# Supplementary material
Source: publisher figshare collection journal article supplement (https://gsajournals.figshare.com/articles/dataset/_/11743566)
Supplement: Supplementary file 1 [file 1]

## Sheet: K.lactis
	Orthologs									2012 RNA-seq data											2016 RNA-seq data																											Genomic location
																					2016 sir2Δ RNA-seq data									2016 sir4Δ RNA-seq data									2016 sum1Δ RNA-seq data
gene_id	S.cer ortholog	K.afr ortholog	N.cas ortholog	V.pol ortholog	E.gos ortholog	L.klu ortholog	C.alb ortholog	A.nid ortholog	S.pom ortholog	sir2Δ_FPKM_12	WT_FPKM_12	sir2Δ_CPM_12	WT_CPM_12	sir2Δ_normcount_12	WT_normcount_12	log2(sir2Δ/WT)_12	DEG by edgeR_12	change in sir2Δ_12	assoc & sir2Δ up_12	assoc & sir2Δ down_12	sir2Δ_FPKM_16	WT_FPKM_16	sir2Δ_CPM_16	WT_CPM_16	sir2Δ_normcount_16	WT_normcount_16	log2(Sir2KO/WT)_16	DEG by edgeR sir2Δ_16	change in sir2Δ_16	sir4Δ_FPKM	WT_FPKM	sir4Δ_CPM	WT_CPM	sir4Δ_normcount	WT_normcount	log2(sir4Δ/WT)	DEG by edgeR sir4Δ	change in sir4Δ	sum1Δ_FPKM	WT_FPKM	sum1Δ_CPM	WT_CPM	sum1Δ_normcount	WT_normcount	log2(sum1Δ/WT)	DEG by edgeR sum1Δ	change in sum1Δ	chromosome	Gene_Start
KLLA0A00110g	NA	NA	NA	NA	NA	NA	XP_709947.1;XP_712986.1	XP_657655.1;XP_657681.1;XP_681222.1	NP_588526.2	0	0	0	0	NA	NA	NA	NA	NA	No	No	0	0	0	0	NA	NA	NA	NA	NA	0	0	0	0	NA	NA	NA	NA	NA	0	0	0	0	NA	NA	NA	NA	NA	Klla0A	2788
KLLA0A00132g	YKL221W	NA	NA	NA	NA	SAKL0G03960g	XP_718716.1;XP_718799.1	XP_661262.1	NA	53.0185	0.193805	44.4254	0.170506	56.3813	0.200061	8.09407	Y	up	No	No	45.9862	0.196452	47.8633	0.183809	58.0266	0.23915	7.75451	Y	up	0.109555	0.179642	0.105442	0.183809	NA	NA	NA	NA	NA	47.4089	0.196958	50.1118	0.183809	59.3282	0.240036	7.79295	Y	up	Klla0A	4628
KLLA0A00143g	NA	NA	NA	NA	NA	NA	NA	NA	NA	0	0	0	0	NA	NA	NA	NA	NA	No	No	0	0	0	0	NA	NA	NA	NA	NA	0	0	0	0	NA	NA	NA	NA	NA	0	0	0	0	NA	NA	NA	NA	NA	Klla0A	6838
KLLA0A00154g	NA	NA	NA	NA	NA	NA	NA	XP_664155.1	NA	0	0	0	0	NA	NA	NA	NA	NA	No	No	0	0	0	0	NA	NA	NA	NA	NA	0	0	0	0	NA	NA	NA	NA	NA	0	0	0	0	NA	NA	NA	NA	NA	Klla0A	8139
KLLA0A00176g	YAR071W;YBR093C;YBR092C;YDL024C	NA	NA	XP_001643599.1	NA	SAKL0B07678g;SAKL0G17028g	XP_713416.1;XP_713442.1;XP_713452.1;XP_713478.1;XP_718284.1;XP_718379.1;XP_722656.1;XP_722801.1	XP_658168.1	NP_595181.1;NP_595928.1;NP_596847.1	35.6851	1.3931	30.5581	1.24976	38.6551	1.46884	4.71526	Y	up	Yes	No	33.8075	3.34642	34.0753	3.05651	41.2694	3.98688	3.35046	Y	up	3.02418	3.05943	2.88967	3.05651	3.61985	3.65975	-0.0355792	N	down	39.249	3.35217	39.9029	3.05651	47.2418	4.00163	3.52582	Y	up	Klla0A	10102
KLLA0A00198g	YGR144W	NA	XP_003676118.1	XP_001647032.1	NP_982405.1	SAKL0G13398g	XP_723050.1;XP_723197.1	XP_661532.1	NP_596642.1	58.9735	31.3729	35.2226	20.1618	44.786	23.6907	0.919419	N	up	No	No	33.6863	33.5512	21.6006	19.8891	26.1971	25.9684	-0.0032402	N	down	35.6675	30.6727	21.9005	19.8891	27.4809	23.8371	0.20426	N	up	26.2618	33.6034	17.3252	19.8891	20.5147	26.0644	-0.344221	N	down	Klla0A	14237
KLLA0A00220g	NA	NA	NA	NA	NA	NA	XP_716454.1	XP_682228.1	NP_595490.2	987.195	877.566	188.403	179.728	238.667	211.206	0.176459	N	up	No	No	517.467	665.718	125.207	148.52	151.761	194.139	-0.35255	N	down	992.053	608.558	228.681	148.52	287.241	178.202	0.690482	N	up	404.207	666.548	99.8572	148.52	118.241	194.856	-0.717056	N	down	Klla0A	17582
KLLA0A00242g	YCR010C;YNR002C	XP_003957879.1;XP_003958844.1;XP_003958845.1	XP_003673798.1;XP_003677558.1	XP_001644050.1	NP_985049.2	SAKL0D09328g	XP_710295.1;XP_710303.1;XP_710650.1;XP_714701.1;XP_714703.1;XP_716688.1;XP_716689.1;XP_716747.1;XP_716748.1;XP_718515.1;XP_718598.1	XP_659443.1;XP_662830.1	NP_593360.1	353.745	23.8112	162.165	11.5393	203.821	13.5529	3.90938	Y	up	Yes	No	81.619	65.2272	42.5871	32.081	51.565	41.8766	0.30962	N	up	34.2592	59.6329	16.789	32.081	21.0318	38.4399	-0.867574	N	down	16.2638	65.3373	8.58584	32.081	10.1598	42.0314	-2.05864	Y	down	Klla0A	18272
KLLA0A00264g	YIR038C	XP_003957297.1	XP_003675656.1	NA	NP_986854.2	SAKL0F16412g	XP_714704.1	XP_658233.1	NP_594063.3	470.182	432.746	179.109	170.427	225.256	200.284	0.169486	N	up	No	No	358.755	386.714	152.257	150.458	184.544	196.564	-0.0893473	N	down	498.809	353.523	200.03	150.458	250.994	180.43	0.477787	N	up	246.425	387.259	106.203	150.458	125.735	197.29	-0.647513	N	down	Klla0A	20634
KLLA0A00286g	YJL074C	XP_003954734.1	XP_003673872.1	XP_001647333.1	NP_982360.1	SAKL0D06116g	XP_719960.1;XP_720093.1	XP_663968.1	NP_593260.1	15.0953	14.6703	41.5982	40.0537	51.8255	47.063	0.138209	N	up	No	No	20.204	9.60236	54.5103	23.9236	66.0393	31.196	1.06996	Y	up	8.78066	8.77934	22.5864	23.9236	28.3521	28.6365	-0.0290593	N	down	12.8281	9.62098	35.3708	23.9236	41.8748	31.3114	0.399944	N	up	Klla0A	22024
KLLA0A00352g	YMR095C;YFL060C;YNL334C	NA	XP_003678020.1	XP_001643363.1	NP_983070.1	SAKL0E03146g	XP_721175.1;XP_721447.1	XP_663745.1	NP_593147.1	423.515	183.897	130.953	60.729	164.629	71.3565	1.20594	Y	up	Yes	No	973.486	595.629	346.302	195.137	419.604	254.496	0.719792	N	up	287.677	544.57	98.2508	195.137	123.181	233.615	-0.924496	N	down	654.835	596.752	237.873	195.137	281.614	255.438	0.138216	N	up	Klla0A	26582
KLLA0A00374g	YNL333W;YFL059W;YMR096W	NA	XP_003678019.1	XP_001643362.1	NP_983069.2	SAKL0E03168g	XP_721174.1;XP_721446.1	XP_680994.1	NP_594982.1	1105.36	446.501	607.542	260.274	766.125	305.773	1.32509	Y	up	Yes	No	1516.63	1141.4	861.925	602.078	1044.47	785.424	0.410755	N	up	557.057	1043.55	304.116	602.078	381.171	720.977	-0.919687	N	down	1017.09	1143.5	590.178	602.078	698.687	788.33	-0.174909	N	down	Klla0A	28198
KLLA0A00396g	YIL156W	XP_003956998.1;XP_003958559.1	XP_003677257.1	XP_001646427.1	NP_985843.2	SAKL0E15136g	XP_717220.1;XP_717296.1	NA	NA	26.5368	24.4246	44.2438	41.9433	55.4323	49.2875	0.168929	N	up	No	No	19.4162	20.5748	43.4022	42.115	52.586	55.0022	-0.0558286	N	down	19.9431	18.8094	42.3296	42.115	53.0959	50.4878	0.0757295	N	up	20.8581	20.6058	47.1345	42.115	55.7995	55.2055	0.018895	N	up	Klla0A	29717
KLLA0A00418g	YIL155C	XP_003956999.1	XP_003677258.1	XP_001645744.1	NP_985842.2	SAKL0E15114g	XP_715442.1;XP_715512.1	XP_659000.1	NP_588348.1	481.402	117.993	611.692	160.106	777.659	188.144	2.04734	Y	up	Yes	No	247.604	372.614	339.918	471.961	412.482	616.443	-0.581027	N	down	459.989	340.639	605.114	471.961	759.657	565.846	0.425136	N	up	81.6102	373.164	114.35	471.961	135.403	618.721	-2.19119	Y	down	Klla0A	33084
KLLA0A00440g	YIL154C	XP_003957000.1	XP_003677259.1	XP_001645743.1	NP_985841.1	SAKL0E15092g	XP_715445.1;XP_715445.1;XP_715445.1;XP_715445.1;XP_715515.1;XP_715515.1;XP_715515.1;XP_715515.1	NA	XP_001713054.1	71.9937	83.1192	43.6295	51.4351	55.2451	60.4456	-0.129346	N	down	No	No	73.3091	107.178	52.6016	69.8216	63.8016	91.1766	-0.523963	N	down	88.4986	97.9815	60.3459	69.8216	75.6866	83.6933	-0.143573	N	down	64.4202	107.34	46.8127	69.8216	55.4263	91.5136	-0.721594	N	down	Klla0A	37134
KLLA0A00462g	YIL153W	XP_003957001.1	XP_003677260.1	XP_001646426.1	NP_985840.1	SAKL0E15070g	XP_719771.1;XP_719888.1	XP_661509.1	NP_594747.1	73.144	58.3326	38.0381	31.0033	48.1885	36.4326	0.404199	N	up	No	No	49.7689	81.2041	36.1558	53.9447	43.8541	70.457	-0.693955	N	down	71.2527	74.2359	48.6229	53.9447	61.0298	64.6741	-0.0817679	N	down	43.3623	81.3247	31.5517	53.9447	37.3595	70.7174	-0.915467	N	down	Klla0A	38766
KLLA0A00484g	YKR097W	XP_003958560.1	XP_003673264.1	XP_001645742.1	NP_985839.1	SAKL0E15048g	XP_718671.1	XP_659522.1	NA	107.348	51.7921	119.403	61.8385	151.241	72.6646	1.05773	Y	up	Yes	No	124.265	208.134	143.826	223.757	174.557	292.123	-0.747057	N	down	189.287	190.279	211.455	223.757	265.486	268.149	-0.0149483	N	down	68.4653	208.468	81.8276	223.757	96.8852	293.203	-1.59757	Y	down	Klla0A	40330
KLLA0A00506g	NA	NA	NA	NA	NA	NA	NA	NA	NA	41.9096	28.239	12.3926	8.8535	15.7428	10.4044	0.599149	N	up	No	No	33.4604	38.6383	10.1605	10.6493	12.3229	13.9076	-0.192086	N	down	34.2095	35.3226	9.84882	10.6493	12.3541	12.7661	-0.0417997	N	down	30.0163	38.6954	8.86042	10.6493	10.4905	13.959	-0.405127	N	down	Klla0A	43949
KLLA0A00528g	YIL151C;YKR096W	XP_003958562.1	XP_003673265.1	XP_001645740.1	NP_985837.2	SAKL0E15004g	XP_722754.1	XP_680983.1	NA	111.199	84.6416	240.533	190.825	306.479	224.23	0.450944	N	up	No	No	54.4348	79.1941	147.341	197.826	178.786	258.487	-0.53422	N	down	83.3795	72.3963	215.807	197.826	270.752	237.269	0.191966	N	up	48.6343	79.3021	134.34	197.826	159.066	259.442	-0.703589	N	down	Klla0A	44587
KLLA0A00539g	YKR095W-A	XP_003958563.1	XP_003673266.1	XP_001645739.1	NP_985836.1	SAKL0E14982g	NA	XP_660449.1	NP_594349.1	107.403	97.9663	16.0248	15.7651	20.2396	18.5254	0.128286	N	up	No	No	149.652	138.359	24.607	21.7986	29.837	28.4709	0.0628311	N	up	90.3767	126.485	15.6044	21.7986	19.5808	26.134	-0.411832	N	down	142.169	138.557	24.6636	21.7986	29.1883	28.5761	0.0338991	N	up	Klla0A	49433
KLLA0A00550g	NA	XP_003958564.1	XP_003673267.1	NA	NP_985835.2	SAKL0E14960g	XP_722749.1;XP_722894.1	XP_659008.1	NA	93.8952	41.8332	58.0418	26.9288	73.6538	31.6407	1.2193	Y	up	No	No	57.0785	51.7801	42.7263	35.6494	51.7894	46.5799	0.16051	N	up	50.0493	47.3355	35.6868	35.6494	44.7988	42.7563	0.0735751	N	up	44.4659	51.8511	33.7678	35.6494	39.9769	46.752	-0.214732	N	down	Klla0A	50099
KLLA0A00572g	YIL150C	XP_003957003.1	XP_003677262.1	XP_001645738.1	NP_985834.1	SAKL0E14938g	XP_713885.1;XP_714087.1	XP_662563.1	NP_596702.1	30.066	30.1965	36.2772	36.5725	45.4467	42.98	0.0797993	N	up	No	No	33.522	30.4465	43.0683	35.7435	52.2275	46.6749	0.154558	N	up	29.3058	27.8344	35.9509	35.7435	45.0999	42.8441	0.0757083	N	up	36.996	30.4943	48.4774	35.7435	57.3893	46.8474	0.294246	N	up	Klla0A	51265
KLLA0A00594g	YKR095W	XP_003957004.1;XP_003957004.1;XP_003958565.1	XP_003677263.1	XP_001645737.1;XP_001645737.1;XP_001645737.1;XP_001645737.1	NP_985833.1	SAKL0E14916g	XP_722752.1;XP_722897.1	XP_663103.1	NP_588236.1	21.9428	26.0216	93.3593	110.318	117.225	129.631	-0.145319	N	down	No	No	24.3755	25.1405	95.8984	90.9475	116.231	118.71	-0.0325116	N	down	25.0479	22.9842	94.5185	90.9475	118.627	108.968	0.120323	N	up	24.8777	25.1823	100.214	90.9475	118.623	119.149	-0.00933468	N	down	Klla0A	53304
KLLA0A00616g	YKR094C;YIL148W	XP_003957005.1;XP_003958566.1	XP_003673268.1;XP_003677264.1	XP_001645736.1	NP_985832.1	SAKL0E14894g	NA	XP_661620.1	NP_593923.1;NP_594398.1	3822.37	4497.59	2185.06	2611.28	2761.04	3068.38	-0.152257	N	down	No	No	3273.18	3891.74	2159.04	2355.26	2617.12	3075.45	-0.232844	N	down	3395.62	3557.86	2151.51	2355.26	2698.87	2823.03	-0.0648707	N	down	3186.51	3897.86	2137.84	2355.26	2530.82	3086.81	-0.286505	N	down	Klla0A	59180
KLLA0A00638g	YIL147C	XP_003957006.1	XP_003677265.1	XP_001646424.1	NP_985831.2	SAKL0E14872g	XP_717880.1;XP_717880.1;XP_717946.1;XP_717946.1	XP_659404.1;XP_659404.1;XP_659404.1;XP_659404.1	NP_588379.1;NP_588379.1;NP_588379.1;NP_588379.1;NP_594410.1;NP_594410.1;NP_594410.1;NP_594410.1;NP_594687.1;NP_594687.1;NP_594687.1;NP_594687.1;NP_594687.1;NP_594687.1;NP_594687.1;NP_594687.1;NP_594687.1	13.7228	28.2735	30.2407	63.9302	37.9656	75.1186	-0.985024	N	down	No	No	17.1723	21.1288	44.1536	49.9389	53.5143	65.1806	-0.288395	N	down	21.7616	19.3166	53.5758	49.9389	67.1955	59.8316	0.164838	N	up	19.4915	21.1642	51.0833	49.9389	60.4611	65.4217	-0.119709	N	down	Klla0A	60378
KLLA0A00660g	YIL146C	XP_003957007.1	XP_003677266.1	NA	NP_985830.1	SAKL0E14850g	NA	NA	NA	68.1744	23.3251	69.8052	25.1081	88.6626	29.5064	1.58771	Y	up	No	No	24.8658	29.4849	28.3254	30.1553	34.3364	39.4258	-0.188443	N	down	33.7214	26.9528	36.3992	30.1553	45.6876	36.189	0.347805	N	up	18.1434	29.5199	21.0431	30.1553	24.9189	39.5713	-0.651012	N	down	Klla0A	64397
KLLA0A00682g	YGL245W	XP_003959488.1	XP_003676456.1	XP_001643704.1	NP_985811.2	SAKL0F00748g	XP_720349.1	XP_681493.1	NP_593483.1	231.405	247.99	373.771	423.348	472.372	497.432	-0.0745296	N	down	No	No	249.897	329.499	378.377	461.205	458.643	602.122	-0.392988	N	down	301.284	301.233	438.384	461.205	550.071	552.706	-0.00703323	N	down	281.477	330.03	435.386	461.205	515.452	604.348	-0.229724	N	down	Klla0A	67685
KLLA0A00715g	YFR048W	XP_003959220.1	XP_003677234.1	XP_001643705.1	NP_985812.2	SAKL0F00770g	XP_720350.1	XP_659600.1	NP_592883.4	32.2078	32.7829	39.0826	41.2463	49.6841	48.462	0.036721	N	up	No	No	30.2862	32.7511	41.3813	43.2701	50.1616	56.4753	-0.178085	N	down	29.1686	29.9421	40.1619	43.2701	50.393	51.8407	-0.0450447	N	down	29.1665	32.8061	41.9746	43.2701	49.6848	56.6841	-0.196881	N	down	Klla0A	69861
KLLA0A00737g	YGL244W	XP_003959487.1	XP_003676457.1	XP_001643706.1	NP_985813.1	SAKL0F00814g	XP_720339.1;XP_720340.1	XP_662174.1	NP_595507.1	70.8513	62.8204	81.7715	74.3922	102.93	87.4095	0.23565	N	up	No	No	82.6608	66.6008	100.338	74.3039	121.662	97.0217	0.323284	N	up	58.773	60.887	68.4858	74.3039	85.9297	89.0589	-0.0513718	N	down	78.4438	66.7054	97.0794	74.3039	114.927	97.3804	0.239185	N	up	Klla0A	72233
KLLA0A00759g	YGL243W	XP_003959486.1	XP_003676458.1	XP_001642746.1	NP_985814.1	SAKL0F00836g	XP_720401.1	XP_661697.1	NP_596783.1	47.7415	54.1189	31.2931	36.7073	39.4747	43.1253	-0.127557	N	down	No	No	57.2876	47.7751	43.5012	33.2395	52.7307	43.4163	0.283522	N	up	39.5232	43.6756	29.3593	33.2395	36.8094	39.8527	-0.10877	N	down	63.6566	47.8469	49.128	33.2395	58.1646	43.5767	0.42304	N	up	Klla0A	74187
KLLA0A00781g	YGL242C	XP_003959221.1	XP_003677233.1	XP_001643707.1	NP_985815.1	SAKL0F00858g	XP_720400.1	XP_661824.1	NP_593466.1	137.499	135.777	32.6161	34.1689	40.8806	40.1439	0.025338	N	up	No	No	170.132	143.353	46.3134	36.8363	56.125	48.0996	0.225854	N	up	142.655	131.055	37.4612	36.8363	47.0163	44.152	0.0905479	N	up	142.949	143.58	40.1767	36.8363	47.5597	48.2774	-0.0213874	N	down	Klla0A	75435
KLLA0A00803g	YGL241W	XP_003959222.1	XP_003677232.1	XP_001642745.1	NP_985816.3	SAKL0F00880g	XP_720377.1	XP_659768.1	NP_593739.2	20.1607	25.1424	32.6373	41.192	40.7284	48.4003	-0.249894	N	down	No	No	22.7478	22.6072	47.7953	43.5361	57.9172	56.812	0.024398	N	up	16.5824	20.6685	33.3129	43.5361	41.7483	52.15	-0.322742	N	down	25.5515	22.6461	54.6296	43.5361	64.677	57.0221	0.173798	N	up	Klla0A	76350
KLLA0A00825g	NA	NA	NA	NA	NP_985817.2	NA	NA	NA	NA	17.161	16.6934	8.64004	8.61526	10.8699	10.1235	0.10224	N	up	No	No	16.3706	13.0804	10.7043	8.14034	12.9636	10.6293	0.312038	N	up	10.6009	11.958	6.63143	8.14034	8.31695	9.75696	-0.227013	N	down	15.8865	13.1	10.6499	8.14034	12.6063	10.6686	0.240117	N	up	Klla0A	79588
KLLA0A00847g	YGL240W	XP_003959485.1	XP_003676459.1	XP_001643242.1	NP_985819.1	SAKL0F00946g	XP_717521.1;XP_717594.1	XP_658515.1	NP_595803.1	10.0512	28.4245	3.93459	11.2377	4.85998	13.2012	-1.44704	Y	down	No	No	22.7068	22.0893	10.728	9.51361	12.9956	12.4152	0.0701418	N	up	20.9168	20.1951	9.35391	9.51361	11.7548	11.3964	0.0288426	N	up	23.7917	22.1279	11.3906	9.51361	13.4832	12.4611	0.0961041	N	up	Klla0A	80886
KLLA0A00869g	YGL238W	XP_003959484.1	XP_003676460.1	XP_001643241.1	NP_985820.2	SAKL0F00968g	XP_716484.1;XP_716539.1	XP_664195.1	NP_595530.1	49.3265	53.2974	77.5396	86.4667	97.4101	101.608	-0.0610483	N	down	No	No	45.1582	45.1922	94.652	87.2475	114.71	113.932	0.0114438	N	up	38.2669	41.3147	76.5241	87.2475	95.9821	104.582	-0.122585	N	down	54.3343	45.2614	116.136	87.2475	137.504	114.354	0.267042	N	up	Klla0A	81975
KLLA0A00891g	YGL237C	XP_003959483.1	XP_003676461.1	XP_001643708.1	NP_985804.1	SAKL0F00990g	XP_716482.1;XP_716536.1	XP_680814.1	NP_595491.1	26.2017	35.3679	14.7733	19.9524	18.5466	23.4429	-0.339115	N	down	No	No	28.1665	35.2107	16.3323	18.7121	19.7961	24.4245	-0.311029	N	down	35.1047	32.1904	19.1125	18.7121	23.975	22.4201	0.0919174	N	up	26.7075	35.2684	15.3628	18.7121	18.1865	24.5148	-0.439408	N	down	Klla0A	85013
KLLA0A00913g	NA	XP_003959223.1	XP_003677231.1	XP_001643240.1	NP_985803.2	SAKL0F01012g	XP_717516.1;XP_717589.1	NA	NA	45.2306	25.4419	21.1135	12.2507	26.5208	14.3951	0.880709	N	up	No	No	53.0494	37.3652	25.5309	16.618	30.9355	21.7064	0.525221	N	up	31.1255	34.1589	13.8889	16.618	17.4078	19.9248	-0.185291	N	down	55.8206	37.4208	26.8864	16.618	31.8289	21.7866	0.555991	N	up	Klla0A	86295
KLLA0A00935g	YGL236C	XP_003959482.1	XP_003676462.1	XP_001643709.1	NP_985802.2	SAKL0F01034g	XP_717515.1;XP_717588.1	XP_664181.1	NP_595531.1	17.7765	21.4877	23.1179	28.7688	29.1176	33.7985	-0.215268	N	down	No	No	34.3489	27.5668	51.5123	37.4653	62.4329	48.8662	0.342707	N	up	19.3753	25.2037	27.8309	37.4653	34.8892	44.8567	-0.368624	N	down	52.4954	27.6188	79.4832	37.4653	94.0976	49.047	0.92706	N	up	Klla0A	87118
KLLA0A00957g	YGL234W	XP_003959481.1	XP_003676463.1	XP_001643239.1	NP_985801.2	SAKL0F01056g	XP_717526.1	XP_664145.1	NP_596304.1	156.476	193.791	251.06	333.967	316.641	392.428	-0.309554	N	down	No	No	136.653	193.576	232.607	303.811	281.973	396.728	-0.492947	N	down	182.397	176.968	298.22	303.811	374.14	364.167	0.0391796	N	up	193.605	193.875	336.695	303.811	398.63	398.195	0.00183797	N	up	Klla0A	89999
KLLA0A00979g	YFR045W	XP_003959224.1	XP_003677230.1	XP_001643238.1	NP_985800.1	SAKL0F01078g	XP_717517.1;XP_717590.1	XP_661065.1	NA	188.142	94.2018	103.836	54.6228	131.88	64.1845	1.03923	Y	up	No	No	207.255	165.097	137.416	101.388	166.585	132.373	0.329999	N	up	145.72	150.935	92.0544	101.388	115.519	121.509	-0.0735013	N	down	194.637	165.364	131.699	101.388	155.92	132.862	0.230359	N	up	Klla0A	92561
KLLA0A01001g	YFR044C	XP_003959226.1	XP_003677229.1	XP_001643237.1	NP_985799.1	SAKL0F01100g	XP_721825.1;XP_721985.1	XP_661063.1	NP_595077.2	542.483	280.034	557.743	306.385	702.649	359.973	0.964901	N	up	No	No	297.946	394.818	334.616	408.07	405.495	532.759	-0.393545	N	down	398.329	360.949	428.824	408.07	538.123	489.036	0.137829	N	up	310.129	395.452	354.504	408.07	419.718	534.729	-0.349536	N	down	Klla0A	94392
KLLA0A01023g	YGL233W	XP_003959480.1	XP_003676464.1	XP_001643236.1	NP_985798.2	SAKL0F01166g	XP_711526.1;XP_711547.1	XP_664097.1	NP_587884.2	25.8755	29.223	39.0932	44.0105	48.9607	51.7145	-0.0796465	N	down	No	No	28.6437	28.4885	54.2015	49.6941	65.6967	64.875	0.015439	N	up	25.9272	26.0447	46.932	49.6941	58.8457	59.5508	-0.0172326	N	down	27.7036	28.5343	53.4676	49.6941	63.3004	65.1148	-0.0431315	N	down	Klla0A	96383
KLLA0A01045g	YGL232W	XP_003959479.1	XP_003676465.1	XP_001643235.1	NP_985797.1	SAKL0F01188g	XP_715231.1	XP_662493.1	NP_001018836.1	58.007	90.8946	33.2111	53.2103	41.6783	62.5266	-0.585819	N	down	No	No	93.0701	93.1256	53.2903	49.2151	64.583	64.2793	0.0118798	N	up	93.7507	85.1345	51.3055	49.2151	64.3644	59.0034	0.128526	N	up	96.4012	93.2644	56.6108	49.2151	67.0112	64.5169	0.0581262	N	up	Klla0A	99292
KLLA0A01067g	YGL231C	XP_003959478.1	XP_003676466.1	XP_001643234.1	NP_985796.1	SAKL0F01210g	XP_715232.1	XP_663555.1	NP_588167.1	107.239	78.1508	28.411	21.8131	35.916	25.6342	0.487076	N	up	No	No	112.006	68.7071	36.1884	20.575	43.8923	26.8849	0.707608	N	up	75.3966	62.8092	23.3767	20.575	29.3418	24.678	0.259944	N	up	111.712	68.7995	37.2543	20.575	44.1138	26.9842	0.725217	N	up	Klla0A	100259
KLLA0A01089g	YFR043C	XP_003959227.1	XP_003677312.1	XP_001643233.1	NP_985795.1	SAKL0F01254g	XP_711527.1;XP_711548.1	XP_659610.1	NP_593781.1	53.706	26.8353	16.0692	8.3045	20.1422	9.75865	1.04402	Y	up	Yes	No	51.766	26.5192	21.7473	10.2812	26.3596	13.4239	0.971246	N	up	24.86	24.2441	10.0445	10.2812	12.5824	12.3222	0.0355481	N	up	57.5866	26.5611	24.4548	10.2812	28.9471	13.4735	1.10088	Y	up	Klla0A	102036
KLLA0A01111g	YFR042W	XP_003959228.1	XP_003677228.1	XP_001643232.1	NP_985794.1	SAKL0F01276g	NA	XP_680883.1	NA	146.008	153.041	40.7593	45.0988	51.3582	52.9884	-0.0452222	N	down	No	No	138.299	152.583	48.4405	49.1722	58.6975	64.2116	-0.12412	N	down	157.796	139.491	52.9621	49.1722	66.4545	58.9415	0.174116	N	up	156.662	152.817	56.4946	49.1722	66.869	64.449	0.0537845	N	up	Klla0A	102802
KLLA0A01133g	YFR041C	XP_003959229.1	XP_003677227.1	XP_001643231.1	NP_985793.1	SAKL0F01298g	XP_711987.1;XP_712007.1	XP_663374.1;XP_663374.1;XP_663374.1;XP_663374.1	NP_594141.1	50.4176	62.9677	22.7286	29.1806	28.4842	34.2916	-0.268387	N	down	No	No	74.3776	74.348	40.413	37.0302	48.9666	48.349	0.0236398	N	up	57.5458	67.9697	29.2283	37.0302	36.6348	44.3809	-0.27441	N	down	79.2909	74.4656	42.9539	37.0302	50.8621	48.5277	0.0683404	N	up	Klla0A	103746
KLLA0A01155g	YFR040W	XP_003959230.1;XP_003959477.1	XP_003676468.1;XP_003677226.1	XP_001643230.1;XP_001643710.1	NP_985792.2	SAKL0F01320g	XP_711988.1;XP_712008.1	XP_663235.1	NA	60.3826	64.1173	97.847	105.512	123.505	124	-0.00563185	N	down	No	No	48.5973	54.0775	105.021	107.814	127.304	140.731	-0.1472	N	down	51.9227	49.4391	107.336	107.814	134.678	129.182	0.0586566	N	up	54.0503	54.167	119.024	107.814	140.907	141.251	-0.00554572	N	down	Klla0A	104687
KLLA0A01177g	YGL228W	XP_003959476.1	XP_003676469.1	XP_001643229.1	NP_985791.1	SAKL0F01342g	XP_711994.1;XP_712015.1	NA	NA	76.0725	68.1975	87.0409	81.5113	110.687	95.7715	0.209148	N	up	No	No	69.9093	85.3271	94.8047	106.25	114.911	138.699	-0.273112	N	down	81.1034	78.0077	106.449	106.25	133.569	127.317	0.0679745	N	up	69.3874	85.4657	96.1664	106.25	113.849	139.212	-0.291735	N	down	Klla0A	108738
KLLA0A01199g	YER043C	XP_003959232.1	XP_003677224.1	XP_001643228.1	NP_985790.1	SAKL0F01364g	XP_721821.1;XP_721980.1	XP_658867.1	NP_595580.1	786.066	1044.03	795.712	1160.52	1004.28	1363.68	-0.441334	N	down	No	No	1196.89	1349.52	1128.41	1176.37	1367.54	1535.3	-0.167065	N	down	1138.26	1233.78	1031.58	1176.37	1295.18	1409.31	-0.122041	N	down	1434.92	1351.81	1382.71	1176.37	1637.09	1540.98	0.0870541	N	up	Klla0A	111159
KLLA0A01221g	YGL227W	XP_003959475.1	XP_003676470.1	XP_001643227.1	NP_985789.1	SAKL0F01386g	XP_720562.1;XP_720689.1	XP_682368.1	NP_588068.2	36.5319	23.651	55.6585	36.7488	70.2207	43.1883	0.701323	N	up	No	No	23.114	28.9569	44.6687	51.5389	54.1797	67.3365	-0.318404	N	down	30.0349	26.4714	55.0919	51.5389	69.1212	61.8092	0.166591	N	up	19.2356	28.997	38.3938	51.5389	45.4656	67.5853	-0.563804	N	down	Klla0A	113308
KLLA0A01287g	YGL226C-A	XP_003959474.1	XP_003676471.1	XP_001643226.1	NP_985788.2	SAKL0F01408g	XP_719076.1;XP_719193.1	NA	NA	213.796	182.247	39.5262	34.2358	49.8292	40.2314	0.308802	N	up	No	No	256.525	254.478	46.0215	44.0979	55.7838	57.574	-0.0481307	N	down	245.395	232.65	43.5436	44.0979	54.646	52.8489	0.0468785	N	up	241.617	254.896	45.149	44.0979	53.4352	57.7868	-0.115706	N	down	Klla0A	115966
KLLA0A01297g	YGL226W	XP_003959473.1	XP_003676472.1	XP_001643225.1	NP_985787.1	SAKL0F01430g	NA	NA	NA	41.0088	48.9168	8.26701	10.328	10.3625	12.135	-0.229684	N	down	No	No	94.6709	74.8821	19.8157	14.6455	23.9974	19.1159	0.339947	N	up	58.7837	68.4609	12.0669	14.6455	15.1259	17.5472	-0.216504	N	down	81.7637	75.0135	18.4554	14.6455	21.8418	19.1866	0.175127	N	up	Klla0A	116612
KLLA0A01309g	YER042W	XP_003959233.1	XP_003677223.1	XP_001643224.1	NP_985786.2	SAKL0F01452g	XP_719477.1;XP_719602.1	XP_662118.1	NP_594563.1	72.4928	96.2075	19.9626	28.4769	25.1729	33.4604	-0.410394	N	down	No	No	124.886	60.2643	37.8362	16.8528	45.8242	22.0019	1.06726	Y	up	45.0596	55.0943	13.1147	16.8528	16.4699	20.1962	-0.299716	N	down	216.016	60.3598	65.9204	16.8528	78.028	22.0832	1.81683	Y	up	Klla0A	117215
KLLA0A01320g	YER041W	XP_003959234.1	XP_003677222.1	XP_001643462.1	NP_985785.1	SAKL0F01474g	XP_711995.1;XP_712017.1	XP_660790.1	NA	14.0608	14.8603	16.078	17.682	20.3401	20.7772	-0.0301043	N	down	No	No	16.7402	14.7621	20.302	16.646	24.6032	21.7444	0.190944	N	up	14.1321	13.4951	16.5591	16.646	20.7863	19.9596	0.0647932	N	up	15.6567	14.7831	19.4818	16.646	23.0602	21.8247	0.0889152	N	up	Klla0A	118369
KLLA0A01342g	YER040W	XP_003959235.1	XP_003677221.1	XP_001643461.1	NP_985784.2	SAKL0F01496g	XP_715773.1;XP_716530.1;XP_716583.1;XP_721822.1;XP_721981.1;XP_723364.1;XP_723364.1;XP_723553.1;XP_723553.1	XP_657780.1;XP_681936.1	NP_588278.2;NP_592936.1	24.85	27.8487	35.3263	40.9211	44.4547	48.0845	-0.113342	N	down	No	No	27.4819	34.6333	46.4236	53.785	56.2707	70.247	-0.318123	N	down	33.6914	31.6613	54.6064	53.785	68.5117	64.4813	0.0900549	N	up	29.0478	34.6841	49.933	53.785	59.1054	70.5066	-0.251519	N	down	Klla0A	120385
KLLA0A01364g	YGL225W;YER039C	XP_003959472.1	XP_003676473.1;XP_003677220.1	XP_001643071.1;XP_001647029.1	NP_985783.2	SAKL0F01518g	XP_716485.1;XP_716540.1	XP_682117.1;XP_682567.1	NP_594679.1	597.115	695.223	323.735	403.917	408.975	474.619	-0.214709	N	down	No	No	625.828	740.299	412.272	448.373	499.617	585.363	-0.228406	N	down	626.717	676.792	396.718	448.373	497.709	537.322	-0.110592	N	down	589.29	741.485	394.334	448.373	466.835	587.527	-0.331966	N	down	Klla0A	124161
KLLA0A01386g	YER038C	XP_003955582.1	XP_003677219.1	XP_001643072.1	NP_985782.1	SAKL0F01540g	NA	NA	NA	43.4548	47.5054	25.3453	27.5302	31.8631	32.3454	-0.0222786	N	down	No	No	43.702	42.1251	32.4662	28.7572	39.33	37.5711	0.0829917	N	up	37.7149	38.5096	27.0092	28.7572	33.887	34.4871	-0.0173205	N	down	42.3735	42.1846	32.1506	28.7572	38.0622	37.7099	0.0246703	N	up	Klla0A	125585
KLLA0A01408g	YGL224C	XP_003959471.1	XP_003676474.1	XP_001647028.1	NP_985781.2	SAKL0F01562g	XP_721832.1;XP_721992.1	XP_663929.1	NP_592842.1	138.998	101.89	60.8039	45.8352	76.9755	53.8582	0.515478	N	up	No	No	70.3414	78.1349	37.3497	38.2879	45.2837	50.1008	-0.137432	N	down	141.303	71.4214	71.5065	38.2879	89.801	45.9867	0.974583	N	up	60.0916	78.2118	32.9396	38.2879	39.0001	50.2856	-0.354036	N	down	Klla0A	126900
KLLA0A01430g	YGL223C	XP_003959470.1	XP_003676475.1	NA	NP_985780.3	SAKL0F01584g	NA	NA	NP_594976.1	47.0259	52.1226	33.7786	39.1574	42.4269	46.0081	-0.117508	N	down	No	No	75.6804	73.6386	57.8379	52.1033	70.0529	68.0622	0.0535803	N	up	59.3923	67.3193	43.6719	52.1033	54.7775	62.4755	-0.185143	N	down	79.8365	73.7467	62.4073	52.1033	73.8872	68.3137	0.118951	N	up	Klla0A	128139
KLLA0A01452g	YER036C	XP_003959469.1	XP_003676479.1	XP_001647027.1	NP_985779.2	SAKL0F01606g	XP_715966.1;XP_716024.1	XP_659814.1	NP_595939.1	356.237	299.047	416.56	375.059	526.723	440.689	0.257325	N	up	No	No	319.482	366.571	409.332	431.815	496.045	563.585	-0.184359	N	down	272.094	335.133	332.417	431.815	416.978	517.336	-0.311465	N	down	328.132	367.193	427.944	431.815	506.728	565.669	-0.159261	N	down	Klla0A	130078
KLLA0A01474g	YER035W;YGL222C	XP_003959468.1;XP_003959468.1;XP_003959468.1;XP_003959468.1	XP_003676481.1;XP_003677217.1	XP_001647026.1	NP_985778.1	SAKL0F01628g	NA	NA	NA	60.3532	38.2213	42.3672	28.887	53.699	33.9396	0.662354	N	up	No	No	53.4852	58.6334	41.3372	41.6931	50.1033	54.4642	-0.115126	N	down	61.338	53.6014	44.8564	41.6931	56.2286	49.9937	0.175061	N	up	47.0727	58.7178	36.9564	41.6931	43.7442	54.6655	-0.315512	N	down	Klla0A	132423
KLLA0A01496g	YER034W	XP_003955584.1	XP_003677216.1	XP_001647025.1	NP_986900.1	SAKL0F01650g	NA	NA	NA	29.6632	27.4079	10.2876	9.95631	12.9481	11.7029	0.146066	N	up	No	No	48.8713	38.047	15.5272	11.4422	18.8114	14.9272	0.326357	N	up	34.4391	34.7852	10.3266	11.4422	12.964	13.7024	-0.0983446	N	down	50.3641	38.1175	16.7001	11.4422	19.7701	14.9825	0.376939	N	up	Klla0A	134214
KLLA0A01518g	YGL221C	XP_003959467.1	XP_003676482.1	XP_001643074.1	NP_986899.1	SAKL0F01672g	XP_711848.1;XP_711854.1	XP_661289.1;XP_661289.1	NP_588455.1	74.5664	65.2309	35.5919	32.2026	44.8909	37.8373	0.246757	N	up	No	No	103.239	94.5801	55.4876	46.9871	67.2405	61.3676	0.13784	N	up	87.1705	86.4646	45.205	46.9871	56.731	56.3307	0.0124185	N	up	113.668	94.723	62.0307	46.9871	73.4312	61.5944	0.256995	N	up	Klla0A	135063
KLLA0A01551g	YGL220W	XP_003958153.1	XP_003676488.1	XP_001643075.1	NP_986898.1	SAKL0F01694g	NA	XP_661290.1	NP_594282.2	181.046	180.976	12.0945	13.1686	15.2558	15.4728	-0.02011	N	down	No	No	287.885	271.423	19.8632	17.5009	24.0805	22.8413	0.0615646	N	up	191.178	248.142	12.1989	17.5009	15.3149	20.9669	-0.462297	N	down	303.755	271.871	21.0452	17.5009	24.9106	22.9258	0.107943	N	up	Klla0A	136238
KLLA0A01573g	YGL219C	XP_003958152.1	XP_003676487.1	XP_001647024.1	NP_985297.1	SAKL0F01716g	XP_710877.1;XP_710886.1	XP_659659.1	NP_595696.1	97.244	64.2672	94.7405	65.595	121.056	77.0774	0.651642	N	up	No	No	72.3853	101.227	81.4928	105.918	98.8732	138.3	-0.491207	N	down	85.0377	92.5427	92.6291	105.918	116.248	126.949	-0.127199	N	down	50.0301	101.386	57.4093	105.918	67.9768	138.811	-1.02913	Y	down	Klla0A	136823
KLLA0A01606g	YGL216W	XP_003958151.1	XP_003676486.1	XP_001643076.1	NP_985296.1	SAKL0F01760g	XP_716594.1	XP_662117.1	NP_595703.1;XP_001713122.1	26.6011	15.3786	37.4842	22.0682	47.36	25.9352	0.869207	N	up	No	No	20.3084	11.4497	33.3446	17.4489	40.3864	22.7742	0.831102	N	up	11.4792	10.4677	18.022	17.4489	22.6384	20.9053	0.105691	N	up	17.7858	11.4691	29.6007	17.4489	35.0464	22.8584	0.607353	N	up	Klla0A	139355
KLLA0A01628g	YGL215W	XP_003958150.1	XP_003676485.1	XP_001643077.1	NP_985295.1	NA	XP_712352.1;XP_712388.1	XP_662588.1	NP_595716.1	769.366	599.5	501.599	416.958	638.785	489.972	0.382686	N	up	No	No	700.363	591.865	593.363	461.496	719.236	602.683	0.255148	N	up	593.054	541.082	480.767	461.496	603.639	553.217	0.125857	N	up	797.745	592.769	688.969	461.496	815.579	604.91	0.431324	N	up	Klla0A	143922
KLLA0A01650g	YGL213C	XP_003958149.1	XP_003676484.1	XP_001647023.1	NP_985294.1	SAKL0F01804g	XP_718033.1;XP_718099.1	XP_658991.1	NP_596145.1	92.8189	88.4809	63.4115	63.1107	80.1315	74.1459	0.112218	N	up	No	No	94.479	107.5	78.611	82.4894	95.2824	107.775	-0.174165	N	down	96.5691	98.2741	77.1206	82.4894	96.7721	98.928	-0.0283418	N	down	91.5037	107.655	77.8097	82.4894	92.1197	108.173	-0.226943	N	down	Klla0A	146030
KLLA0A01672g	YGL212W	XP_003958148.1	XP_003676483.1	XP_001647022.1	NP_985293.2	SAKL0F01826g	XP_712300.1;XP_712444.1	XP_662155.1	NP_587792.1	42.5082	39.5882	26.319	25.3453	33.0532	29.786	0.149609	N	up	No	No	60.8591	45.99	42.2231	29.4017	51.1821	38.3728	0.406329	N	up	40.2389	42.046	26.5257	29.4017	33.2678	35.2238	-0.0867475	N	down	59.8908	46.0691	42.2124	29.4017	49.971	38.5147	0.366644	N	up	Klla0A	147876
KLLA0A01694g	YCR098C	XP_003954862.1	XP_003674483.1;XP_003675386.1	XP_001645508.1	NP_984293.2	SAKL0G04994g	XP_715684.1;XP_715685.1;XP_715686.1;XP_715740.1;XP_715741.1;XP_715742.1	XP_663153.1	NP_595141.1	37.5113	22.7533	36.0006	23.3904	45.47	27.484	0.72642	N	up	No	No	48.5882	53.3562	58.8074	59.5203	71.2778	77.7955	-0.119061	N	down	48.6416	48.7755	56.3344	59.5203	70.7176	71.4091	-0.00859575	N	down	80.2017	53.4258	99.0872	59.5203	117.313	78.0829	0.595561	N	up	Klla0A	149587
KLLA0A01738g	YML008C	XP_003956667.1	XP_003677914.1	XP_001645507.1	NP_984292.1	SAKL0G04972g	XP_721588.1;XP_721708.1	XP_664750.1	NP_595787.1	613.888	835.501	396.994	579.257	500.858	680.621	-0.442424	N	down	No	No	437.773	514.102	322.323	350.44	390.638	457.812	-0.228049	N	down	659.018	469.978	468.39	350.44	587.97	420.234	0.485069	N	up	366.713	514.829	276.654	350.44	327.578	459.504	-0.487222	N	down	Klla0A	152383
KLLA0A01760g	YML007W	XP_003956666.1;XP_003956666.1	XP_003676949.1;XP_003677913.1	XP_001645506.1;XP_001646782.1	NP_984291.2	SAKL0G04950g	XP_721582.1;XP_721582.1;XP_721702.1;XP_721702.1	XP_680782.1;XP_680782.1;XP_680782.1;XP_680782.1	NP_593662.1;NP_593662.1;NP_593662.1;NP_593662.1	279.147	75.4511	313.463	89.9614	399.859	105.706	1.91948	Y	up	No	No	226.507	150.922	281.256	173.317	340.969	226.276	0.590586	N	up	116.167	137.976	138.192	173.317	173.51	207.705	-0.260245	N	down	238.082	151.165	302.259	173.317	357.893	227.112	0.655791	N	up	Klla0A	154859
KLLA0A01782g	YML006C	XP_003956665.1	XP_003676947.1;XP_003677912.1;XP_003677912.1;XP_003677912.1;XP_003677912.1	XP_001646784.1	NP_984294.2;NP_984294.2	SAKL0G04906g	NA	NA	NA	52.7053	100.319	47.5695	90.3364	59.5188	106.143	-0.835207	N	down	No	No	49.9297	47.4979	54.8173	47.629	66.4444	62.2056	0.0972258	N	up	50.8369	43.422	53.5568	47.629	67.2159	57.1	0.237309	N	up	53.04	47.5683	59.6257	47.629	70.5985	62.4355	0.181349	N	up	Klla0A	157216
KLLA0A01804g	YDR421W	XP_003957618.1	XP_003676946.1	XP_001646664.1	NP_984295.2	SAKL0G04884g	XP_721239.1;XP_721510.1	XP_658376.1;XP_659497.1;XP_664493.1;XP_664493.1;XP_664493.1;XP_664493.1	NP_112417.1;NP_593001.1;NP_594923.1;NP_596766.1	13.5027	19.3205	24.9237	36.7963	31.4246	43.2404	-0.460436	N	down	No	No	17.3784	21.374	36.0254	40.6035	43.7012	53.0086	-0.293759	N	down	18.2432	19.5404	36.1399	40.6035	45.343	48.6582	-0.103289	N	down	18.7127	21.4082	39.4447	40.6035	46.6963	53.2046	-0.190918	N	down	Klla0A	159689
KLLA0A01826g	YDR420W	XP_003957619.1	XP_003673467.1	XP_001645186.1	NP_984296.2	SAKL0G04862g	XP_722401.1;XP_722538.1	NA	NA	26.3935	21.3138	72.6945	62.0192	91.6169	72.883	0.330119	N	up	No	No	22.2839	23.7321	73.2596	71.6532	88.7925	93.5323	-0.0772333	N	down	18.9151	21.6964	59.6657	71.6532	74.8632	85.8565	-0.199571	N	down	26.3811	23.771	88.476	71.6532	104.737	93.8782	0.155058	N	up	Klla0A	163010
KLLA0A01848g	YDR419W	XP_003957620.1	XP_003674157.1	XP_001643052.1	NP_982678.2	SAKL0G04752g	XP_720989.1;XP_721110.1	XP_662282.1	NP_596778.1	14.5156	6.64599	15.4008	7.32469	19.4513	8.60817	1.17646	Y	up	No	No	27.3014	12.7344	37.3716	16.1651	45.2938	21.0982	1.09396	Y	up	5.68907	11.6422	7.41322	16.1651	9.29277	19.3668	-1.06123	Y	down	42.2647	12.7558	58.7121	16.1651	69.5106	21.1762	1.70428	Y	up	Klla0A	167886
KLLA0A01870g	NA	NA	NA	NA	NP_982677.1	SAKL0G04730g	XP_721591.1;XP_721711.1	XP_658666.1	NA	19.9707	34.74	9.85829	17.4726	12.4188	20.5294	-0.725493	N	down	No	No	34.6153	37.065	18.9994	18.7074	23.0308	24.4393	-0.0788915	N	down	34.1408	33.8839	17.6819	18.7074	22.1882	22.4332	-0.00722693	N	down	35.8225	37.1178	20.0503	18.7074	23.736	24.5296	-0.0353175	N	down	Klla0A	170104
KLLA0A01903g	YDR418W;YEL054C	XP_003956664.1;XP_003957621.1	XP_003674156.1;XP_003677911.1	XP_001642731.1;XP_001643053.1	NP_982676.1	SAKL0G04708g	XP_721592.1;XP_721712.1	XP_657866.1	NP_587897.1;NP_587923.1	5947.31	7816.86	1863.38	2653.35	2357.36	3117.76	-0.403328	N	down	No	No	8579.42	10549.7	2204.94	2512.58	2672.22	3280.9	-0.296006	N	down	9134.23	9644.63	2268.41	2512.58	2845.43	3011.62	-0.0818687	N	down	8314.81	10566.2	2186.05	2512.58	2587.92	3293.03	-0.347604	N	down	Klla0A	172232
KLLA0A01925g	YEL053C	XP_003956663.1	XP_003677910.1	XP_001642366.1	NP_982675.1	SAKL0G04664g	XP_721583.1;XP_721703.1	XP_663694.1	NP_596720.1	24.6595	34.2976	33.8222	48.4811	42.776	56.9656	-0.412684	N	down	No	No	27.6672	36.1608	47.267	56.699	57.2941	73.9831	-0.376131	N	down	29.3385	33.06	47.3747	56.699	59.501	67.9121	-0.196455	N	down	34.2776	36.2244	59.594	56.699	70.5517	74.2567	-0.0808497	N	down	Klla0A	173617
KLLA0A01947g	YEL052W	XP_003956662.1	XP_003677909.1	XP_001642730.1	NP_982674.1	SAKL0G04642g	XP_715547.1;XP_715603.1	XP_664633.1	NP_595259.1	39.0459	39.7894	33.3432	35.888	41.8763	42.1644	-0.0102837	N	down	No	No	33.977	43.711	35.8355	43.2277	43.407	56.413	-0.373132	N	down	38.4081	39.9621	39.8845	43.2277	50.0448	51.7837	-0.0545143	N	down	32.1218	43.7851	34.9443	43.2277	41.376	56.6216	-0.458983	N	down	Klla0A	176815
KLLA0A01969g	YDR416W	XP_003957622.1	XP_003674155.1	XP_001642367.1	NP_982673.2	SAKL0G04620g	XP_715549.1;XP_715605.1	XP_657715.1	NP_596612.1	13.4399	25.4763	19.2477	36.5931	24.0901	42.9976	-0.837053	N	down	No	No	19.0885	20.8829	33.2484	33.4646	40.2746	43.7069	-0.103838	N	down	20.5956	19.0909	34.4167	33.4646	43.1705	40.1196	0.109951	N	up	24.6634	20.9137	43.3116	33.4646	51.2641	43.8684	0.228331	N	up	Klla0A	178458
KLLA0A01991g	YEL051W	XP_003956661.1	XP_003674154.1	XP_001642729.1	NP_982672.1	SAKL0G04598g	XP_715551.1;XP_715607.1	XP_657714.1	NP_588513.1	186.56	200.098	99.7643	112.344	125.843	132.015	-0.0690559	N	down	No	No	195.238	218.285	101.511	104.026	123.046	135.889	-0.141613	N	down	256.149	199.552	127.666	104.026	160.26	124.735	0.363176	N	up	192.849	218.6	101.241	104.026	119.856	136.391	-0.183571	N	down	Klla0A	181274
KLLA0A02013g	YDR415C	XP_003957623.1	XP_003674153.1	XP_001642728.1	NP_982671.1	SAKL0G04576g	XP_718505.1;XP_718588.1	XP_664639.1	NA	133.238	57.8139	83.1873	37.4225	105.43	43.9689	1.26195	Y	up	No	No	82.7064	60.7947	61.3515	41.6812	74.382	54.4668	0.454588	N	up	67.1141	55.5761	48.4471	41.6812	60.7955	49.9957	0.289318	N	up	64.3755	60.8768	49.2207	41.6812	58.265	54.668	0.101636	N	up	Klla0A	182326
KLLA0A02035g	YEL050C	XP_003956660.1	XP_003677908.1	XP_001642727.1	NP_982670.1	SAKL0G04554g	XP_717698.1;XP_717792.1	XP_661253.1	NP_587925.2	123.842	150.467	93.2671	119.328	117.073	140.181	-0.260174	N	down	No	No	277.407	216.372	222.952	160.058	270.13	208.896	0.370669	N	up	153.518	197.815	118.604	160.058	148.723	191.753	-0.367248	N	down	341.436	216.741	279.916	160.058	331.392	209.669	0.658693	N	up	Klla0A	183620
KLLA0A02057g	YDR414C	XP_003957624.1	XP_003674152.1	XP_001642726.1	NP_982669.1	SAKL0G04488g	XP_717529.1;XP_717603.1	XP_663286.1	NP_592955.2;NP_593018.1	70.1946	72.5946	37.0137	39.9773	46.713	46.9736	-0.00786629	N	down	No	No	88.5998	76.9854	68.5526	55.0784	83.0909	71.9279	0.209391	N	up	66.3864	70.3802	49.3904	55.0784	61.9825	66.0244	-0.0900359	N	down	89.2459	77.1042	70.8659	55.0784	83.8954	72.1937	0.218735	N	up	Klla0A	186220
KLLA0A02079g	YDR412W	XP_003957625.1	XP_003674151.1	XP_001642725.1	NP_982668.1	SAKL0G04466g	XP_717530.1;XP_717604.1	XP_663289.1	NA	29.1538	51.8824	14.6685	27.1565	18.5211	31.9066	-0.78395	N	down	No	No	79.2602	72.6193	35.737	29.7215	43.3004	38.7639	0.151832	N	up	48.3188	66.3942	21.3306	29.7215	26.7469	35.5833	-0.420372	N	down	100.117	72.7565	45.2999	29.7215	53.6315	38.9073	0.447228	N	up	Klla0A	187421
KLLA0A02101g	YDR411C	XP_003957626.1	XP_003674150.1	XP_001642724.1	NP_982667.1	SAKL0G04444g	XP_719430.1	XP_682121.1	NP_596037.1	51.6588	45.8761	23.0651	21.6911	29.2449	25.4876	0.199371	N	up	No	No	77.6039	86.4847	42.3787	43.1253	51.3508	56.295	-0.130977	N	down	69.971	79.0658	36.2206	43.1253	45.4486	51.675	-0.188013	N	down	79.2028	86.6244	43.6408	43.1253	51.6733	56.5031	-0.131812	N	down	Klla0A	188671
KLLA0A02123g	YML042W	XP_003956659.1	XP_003677907.1	XP_001642368.1	NP_982666.1	SAKL0G04422g	XP_722663.1;XP_722808.1	XP_663883.1	NA	30.1062	13.4184	37.023	17.4289	46.9891	20.4789	1.19877	Y	up	No	No	23.7592	30.0244	34.1067	40.2904	41.3429	52.6243	-0.346103	N	down	27.6091	27.448	38.3779	40.2904	48.1857	48.305	-0.00176729	N	down	13.7581	30.0691	20.2709	40.2904	23.9995	52.8188	-1.13178	Y	down	Klla0A	190132
KLLA0A02145g	YML041C	XP_003956683.1	XP_003676478.1	XP_001642723.1	NP_982665.1	SAKL0G04378g	XP_722746.1	NA	NP_595833.1	36.9262	42.7834	17.8737	21.4293	22.5836	25.177	-0.156297	N	down	No	No	55.634	62.8786	25.4961	25.7832	30.9216	33.6529	-0.140828	N	down	54.9727	57.4858	24.0293	25.7832	30.1333	30.8912	-0.0391672	N	down	59.0529	62.9849	27.1805	25.7832	32.1784	33.7773	-0.0778377	N	down	Klla0A	192493
KLLA0A02167g	YDR410C	XP_003957627.1	XP_003674149.1	XP_001642369.1	NP_982664.1	SAKL0G04356g	XP_714050.1;XP_714051.1;XP_714325.1;XP_714326.1	XP_663766.1	NP_593263.1	110.642	100.236	38.0059	37.1478	48.1041	43.6477	0.140714	N	up	No	No	104.498	112.037	49.2793	49.5522	59.7504	64.6927	-0.122216	N	down	92.561	102.426	42.1748	49.5522	52.9083	59.3834	-0.167279	N	down	101.847	112.217	49.0542	49.5522	58.0715	64.9319	-0.163113	N	down	Klla0A	193623
KLLA0A02189g	YOR156C;YDR409W	XP_003956657.1;XP_003957628.1	XP_003674148.1;XP_003677906.1	XP_001642370.1	NP_982663.1	SAKL0G04334g	XP_718168.1;XP_718435.1	XP_664102.1	NP_593123.1	18.2202	30.0985	29.1712	50.3952	36.9596	59.2172	-0.67913	N	down	No	No	24.9508	37.1302	42.2786	58.7641	51.2605	76.7157	-0.589582	N	down	38.082	33.945	62.033	58.7641	77.8517	70.4197	0.142917	N	up	29.7137	37.1897	51.8349	58.7641	61.3447	76.9993	-0.331152	N	down	Klla0A	194500
KLLA0A02211g	YDR408C	XP_003957629.1	XP_003674147.1	XP_001642721.1	NP_982662.2	SAKL0G04312g	XP_715265.1;XP_715330.1	XP_663526.1	XP_001713172.1	137.383	141.053	44.4393	48.0748	56.0195	56.488	-0.0120261	N	down	No	No	154.97	162.68	59.0205	56.3947	71.5659	73.6271	-0.0480975	N	down	114.753	148.726	42.6203	56.3947	53.453	67.5845	-0.338251	N	down	150.476	162.946	58.5112	56.3947	69.2701	73.8993	-0.0947194	N	down	Klla0A	197863
KLLA0A02233g	YOR157C	XP_003956656.1	XP_003677905.1	XP_001642274.1	NP_982661.1	SAKL0G04290g	XP_719367.1	XP_659689.1	NP_594544.1	310.328	282.088	141.738	138.879	178.947	163.184	0.133084	N	up	No	No	340.473	351.836	163.324	155.056	197.972	202.478	-0.0325794	N	down	345.059	321.648	158.418	155.056	198.82	185.86	0.0973721	N	up	331.938	352.375	161.524	155.056	191.212	203.226	-0.0875866	N	down	Klla0A	198766
KLLA0A02255g	YDR407C	XP_003957630.1	XP_003674146.1	XP_001642275.1	NP_982660.1	SAKL0G04268g	XP_719366.1	XP_664137.1;XP_664137.1	NP_594102.1	17.0382	16.8263	36.5901	37.2752	46.1719	43.8018	0.0762722	N	up	No	No	17.0061	17.6103	46.0606	44.0545	55.8335	57.5009	-0.04902	N	down	16.4232	16.0999	42.7457	44.0545	53.6183	52.7821	0.0196353	N	up	16.5186	17.6398	45.7175	44.0545	54.1125	57.7135	-0.0992442	N	down	Klla0A	199863
KLLA0A02277g	YOR158W	XP_003956654.1	XP_003677904.1	XP_001642720.1	NP_982659.1	SAKL0G04246g	XP_711256.1;XP_711279.1	XP_659271.1	NA	122.997	135.614	89.7037	101.728	112.926	119.536	-0.0821765	N	down	No	No	333.615	243.145	195.137	130.903	236.499	170.908	0.46854	N	up	196.211	222.287	108.919	130.903	136.623	156.882	-0.19941	N	down	414.495	243.536	245.644	130.903	290.805	171.54	0.76108	N	up	Klla0A	203818
KLLA0A02299g	YOR159C	XP_003956653.1	XP_003677903.1	XP_001642276.1	NP_982658.1	SAKL0G04224g	NA	XP_664339.1	NP_595724.1	297.838	339.495	24.2226	29.0552	30.3942	34.1402	-0.1686	N	down	No	No	389.636	293.394	33.9099	23.4994	41.0835	30.6654	0.419867	N	up	298.588	268.233	24.5442	23.4994	30.8034	28.1489	0.120634	N	up	416.991	293.897	36.5611	23.4994	43.2851	30.7788	0.479866	N	up	Klla0A	205013
KLLA0A02321g	YOR160W	XP_003956652.1	XP_003677902.1	XP_001642277.1	NP_982657.2	SAKL0G04202g	XP_711171.1	XP_664338.1	NP_595725.2	55.0439	65.1666	90.8897	110.351	114.312	129.656	-0.181849	N	down	No	No	46.6253	53.3153	100.33	105.022	121.64	137.128	-0.175387	N	down	47.2159	48.7415	96.9332	105.022	121.641	125.874	-0.049509	N	down	48.0207	53.3997	104.917	105.022	124.218	137.635	-0.14781	N	down	Klla0A	205567
KLLA0A02343g	YOR161C	XP_003956651.1	XP_003677901.1	NA	NP_982655.1	SAKL0G04180g	XP_718937.1;XP_719039.1	XP_660732.1	NA	95.4744	114.399	78.5687	100.383	99.6731	117.951	-0.242538	N	down	No	No	80.4676	88.4184	94.0143	94.7757	113.952	123.875	-0.116206	N	down	115.174	80.8267	128.407	94.7757	161.195	113.706	0.507082	N	up	58.5462	88.5298	70.1516	94.7757	83.0661	124.333	-0.576308	N	down	Klla0A	208673
KLLA0A02365g	YOR155C	XP_003956649.1	XP_003677900.1	XP_001642719.1	NP_982654.1	SAKL0G04158g	XP_718178.1;XP_718445.1	XP_660826.1	NP_596282.1	89.4618	87.3587	70.4785	72.6746	89.0587	85.3911	0.0608765	N	up	No	No	44.8619	60.7822	39.1369	49.0245	47.4591	64.0966	-0.430645	N	down	87.1531	55.5623	72.3092	49.0245	90.7467	58.8344	0.633275	N	up	40.2865	60.854	35.7529	49.0245	42.3341	64.3333	-0.592872	N	down	Klla0A	211300
KLLA0A02387g	NA	NA	NA	NA	NP_985953.2	SAKL0G04136g	NA	NA	NA	103.677	6.83333	22.4273	1.55714	28.2976	1.82884	3.94573	Y	up	Yes	No	122.366	20.9661	33.802	5.30177	40.9325	6.92094	2.56933	Y	up	9.48814	19.1675	2.43751	5.30177	3.05159	6.35296	-1.0495	Y	down	127.843	20.9992	36.1452	5.30177	42.7873	6.94653	2.61356	Y	up	Klla0A	213276
KLLA0A02431g	NA	NA	NA	NA	NA	NA	NA	XP_661979.1	NA	57.3275	22.609	13.2495	5.71469	16.6648	6.71572	1.3102	Y	up	Yes	No	52.7196	38.232	15.2712	9.81685	18.5142	12.8236	0.532543	N	up	32.5725	34.9508	9.66264	9.81685	12.1156	11.771	0.0539762	N	up	37.0667	38.2865	10.8226	9.81685	12.8159	12.871	0.00953994	N	up	Klla0A	214580
KLLA0A02453g	YLR351C	XP_003955202.1	XP_003677571.1	XP_001643834.1	NP_983214.1	SAKL0B04444g	XP_713955.1;XP_714013.1	XP_663090.1	NP_594154.1	174.028	164.47	87.0072	87.8337	110.287	103.213	0.0960257	N	up	No	No	174.898	198.537	94.8579	98.6093	114.995	128.813	-0.162987	N	down	226.5	181.499	117.842	98.6093	147.933	118.239	0.324858	N	up	160.119	198.824	88.4854	98.6093	104.764	129.288	-0.30012	N	down	Klla0A	215305
KLLA0A02475g	NA	NA	NA	NA	NA	SAKL0B04466g	XP_716783.1;XP_716843.1;XP_721292.1;XP_721563.1	XP_657778.1	NP_588306.1	186.818	147.603	126.644	104.734	158.833	123.067	0.36789	N	up	No	No	92.9532	121.309	68.3104	83.1342	82.8085	108.674	-0.388069	N	down	158.183	110.893	111.847	83.1342	140.395	99.7523	0.497513	N	up	92.0224	121.46	70.8988	83.1342	83.9182	109.075	-0.372544	N	down	Klla0A	216566
KLLA0A02497g	YGR040W	XP_003956412.1;XP_003958121.1	XP_003673161.1;XP_003675012.1	XP_001643833.1;XP_001647320.1	NP_983213.1	SAKL0B04488g	XP_715542.1;XP_715598.1;XP_715894.1;XP_715945.1	XP_661323.1	NP_594009.1	64.7204	77.0437	37.9718	47.0859	47.8645	55.3324	-0.209174	N	down	No	No	54.6449	59.4968	40.444	40.3248	49.002	52.6979	-0.0909603	N	down	59.4089	54.3892	41.6609	40.3248	52.2525	48.372	0.119831	N	up	61.7838	59.5753	46.5864	40.3248	55.1567	52.8926	0.0718211	N	up	Klla0A	218592
KLLA0A02519g	YLR352W	XP_003955201.1	XP_003673302.1	XP_001643832.1	NP_983212.1	SAKL0B04510g	XP_714193.1;XP_714233.1	XP_663172.1	NA	34.5824	44.4801	49.6199	66.0747	62.9599	77.6363	-0.301774	N	down	No	No	32.314	40.5315	54.8144	63.532	66.4768	82.9758	-0.325726	N	down	38.9717	37.0536	63.473	63.532	79.6667	76.1654	0.0662963	N	up	40.7577	40.5926	70.4541	63.532	83.4233	83.2825	0.00577781	N	up	Klla0A	220146
KLLA0A02541g	YLR353W	XP_003955200.1;XP_003958122.1	XP_003673162.1;XP_003673303.1	XP_001643346.1	NP_983211.1	SAKL0B04532g	XP_718481.1;XP_718565.1;XP_719112.1;XP_719229.1	NA	NA	37.6062	64.3821	43.4315	76.8	55.3192	90.2438	-0.705238	N	down	No	No	36.4275	58.4511	41.8283	61.2239	50.6986	79.988	-0.652906	N	down	73.9616	53.434	80.2763	61.2239	100.799	73.4223	0.460101	N	up	52.9506	58.532	61.3356	61.2239	72.6151	80.2836	-0.13864	N	down	Klla0A	223318
KLLA0A02563g	YGR042W	XP_003958123.1	XP_003673163.1	XP_001643345.1	NP_983210.2	SAKL0B04598g	XP_715994.1;XP_716053.1	XP_681028.1	NP_587772.3	11.3977	9.65833	5.00371	4.44764	6.2738	5.22613	0.261553	N	up	No	No	12.2096	16.1625	5.70543	6.95372	6.92088	9.08067	-0.421065	N	down	15.1616	14.7759	7.01995	6.95372	8.8074	8.33537	0.0829667	N	up	9.97242	16.1879	4.96212	6.95372	5.88163	9.11423	-0.614475	N	down	Klla0A	225343
KLLA0A02585g	YPR196W;YBR297W;YOR380W;YMR019W;YGR288W;YFL052W	XP_003954786.1;XP_003956500.1;XP_003957242.1	XP_003674210.1	NA	NP_985040.1	SAKL0B04620g	XP_711432.1;XP_714604.1;XP_714734.1;XP_718000.1;XP_718067.1;XP_719794.1;XP_719911.1;XP_720596.1;XP_720724.1;XP_722407.1;XP_722640.1;XP_722785.1	XP_658439.1;XP_658738.1;XP_661037.1;XP_664351.1;XP_680879.1;XP_681859.1;XP_682154.1	NP_001018765.1;NP_593001.1;NP_593664.2;NP_595543.1;NP_596766.1;XP_004001692.1	27.1249	48.8439	20.1024	37.6137	25.388	44.1945	-0.79923	N	down	No	No	35.6279	36.2774	26.5489	25.4786	32.1701	33.2626	-0.0448728	N	down	42.0087	33.1656	30.2836	25.4786	38.0167	30.5328	0.312613	N	up	31.194	36.3367	24.2711	25.4786	28.7309	33.3856	-0.22093	N	down	Klla0A	226562
KLLA0A02607g	YGR043C;YLR354C	XP_003955199.1;XP_003958124.1	XP_003673164.1;XP_003678431.1	XP_001643344.1;XP_001644939.1	NP_983208.2	SAKL0B04642g	XP_715096.1;XP_715147.1	XP_657844.1	NP_587953.1	1994.63	1220.15	1472.68	982.833	1863.05	1154.94	0.689864	N	up	No	No	1963.57	2070.62	1289.37	1251.09	1562.6	1633.54	-0.0639933	N	down	1871.55	1892.98	1180.94	1251.09	1482.25	1499.47	-0.0166995	N	down	2023.08	2073.88	1360.65	1251.09	1611.03	1639.58	-0.0253291	N	down	Klla0A	231111
KLLA0A02629g	YGR044C	XP_003958125.1	XP_003673165.1	XP_001646057.1	NA	SAKL0B04664g	XP_713882.1;XP_714084.1	XP_659042.1;XP_659104.1;XP_660523.1	NA	74.6675	38.7448	77.9566	41.413	98.3801	48.6605	1.01566	Y	up	No	No	59.9475	27.9814	71.7353	30.8099	86.9639	40.2377	1.11246	Y	up	33.3202	25.5804	37.8317	30.8099	47.4647	36.9351	0.365061	N	up	57.9562	28.0235	71.069	30.8099	84.129	40.3864	1.06239	Y	up	Klla0A	233822
KLLA0A02651g	NA	NA	NA	NA	NP_983207.1	SAKL0B04686g	XP_716935.1;XP_717002.1	XP_659296.1	NA	64.4225	64.6247	22.8961	23.8928	28.8366	28.0711	0.0384762	N	up	No	No	60.6973	66.6473	24.3354	24.7405	29.503	32.308	-0.135401	N	down	55.5321	60.9284	21.7314	24.7405	27.2318	29.6564	-0.118165	N	down	55.8245	66.7472	22.9509	24.7405	27.17	32.4275	-0.252567	N	down	Klla0A	238735
KLLA0A02673g	YLR355C	XP_003955198.1	XP_003678432.1	XP_001646058.1	NP_983206.2	SAKL0B04708g	XP_714020.1;XP_714297.1	XP_660130.1	NP_001018845.2	2839.45	2728.83	2502.97	2672.71	3178.79	3140.5	0.0174929	N	up	No	No	3350.02	3427.69	2688.68	2540.96	3258.89	3318.17	-0.0259914	N	down	3259.3	3133.6	2511.18	2540.96	3151.9	3045.83	0.0493947	N	up	3165.73	3432.97	2596.53	2540.96	3073.89	3330.43	-0.115614	N	down	Klla0A	240153
KLLA0A02695g	YLR356W	XP_003955197.1	XP_003678433.1	XP_001646060.1	NP_984577.1	SAKL0B04730g	XP_714369.1;XP_714409.1	NA	NA	156.972	95.2024	61.7387	40.0124	78.4875	47.0158	0.739777	N	up	No	No	163.262	200.135	69.5658	77.8342	84.336	101.677	-0.269088	N	down	188.173	182.958	75.9778	77.8342	95.4146	93.3311	0.0332472	N	up	146.621	200.419	62.8425	77.8342	74.3981	102.053	-0.451762	N	down	Klla0A	242521
KLLA0A02717g	YGR052W	XP_003958127.1	XP_003673167.1	NA	NP_984576.2	SAKL0B04752g	XP_720819.1;XP_721332.1	NA	NA	84.407	62.2767	52.0376	40.532	65.9065	47.6198	0.469129	N	up	No	No	35.4989	48.7095	32.0716	40.2407	38.8655	52.6131	-0.423951	N	down	61.1361	44.527	52.3703	40.2407	65.7362	48.2936	0.454002	N	up	25.4621	48.7693	23.0895	40.2407	27.3341	52.8073	-0.937707	N	down	Klla0A	245082
KLLA0A02739g	YGR053C	XP_003958128.1	XP_003673168.1	XP_001646061.1	NP_984575.1	SAKL0B04774g	XP_714024.1;XP_714300.1	NA	NP_588461.1	102.868	101.054	28.8212	29.6858	36.3912	34.8828	0.0613692	N	up	No	No	102.718	105.029	35.2224	33.5091	42.6922	43.7907	-0.0268701	N	down	96.8858	96.013	32.1094	33.5091	40.2792	40.196	0.012606	N	up	96.2071	105.17	34.201	33.5091	40.5003	43.9525	-0.104664	N	down	Klla0A	246644
KLLA0A02761g	YGR054W	XP_003955196.1	XP_003678434.1	XP_001646062.1	NP_984574.2	SAKL0B04796g	XP_721158.1;XP_721430.1	XP_660379.1	NP_596421.1	99.771	163.552	107.532	183.686	134.951	215.827	-0.677657	N	down	No	No	163.334	203.695	207.036	237.84	250.912	310.501	-0.307418	N	down	169.789	186.222	206.254	237.84	258.841	285.018	-0.139389	N	down	177.782	204.025	229.439	237.84	271.619	311.648	-0.198816	N	down	Klla0A	247871
KLLA0A02827g	YHR001W;YKR003W	XP_003954754.1;XP_003957131.1	XP_003673440.1;XP_003676935.1	XP_001642611.1	NP_984573.2	SAKL0A08932g	XP_714614.1	XP_661411.1	NP_588124.2	83.1167	77.3596	67.2427	63.6368	84.6381	74.7825	0.178545	N	up	No	No	89.1201	102.266	82.1208	86.2168	99.5486	112.585	-0.178482	N	down	102.81	93.4915	90.677	86.2168	113.806	103.345	0.139342	N	up	77.4519	102.422	72.8731	86.2168	86.2701	113.001	-0.388631	N	down	Klla0A	250872
KLLA0A02849g	YKR004C	XP_003957132.1	XP_003673439.1	XP_001642612.1	NP_984572.1	SAKL0A08954g	XP_717690.1;XP_717784.1	NA	NA	67.5979	53.3684	29.1197	24.1417	36.8468	28.3711	0.377942	N	up	No	No	46.331	44.7067	29.0537	26.1009	35.2056	34.0857	0.0548432	N	up	40.8668	40.871	24.9773	26.1009	31.3536	31.2881	0.00404889	N	up	45.0935	44.7762	28.874	26.1009	34.1835	34.2117	0.00256323	N	up	Klla0A	252275
KLLA0A02871g	NA	NA	XP_003673438.1	NA	XP_002999474.1	SAKL0A08976g	NA	NA	NA	9.01495	9.96591	11.8309	13.4635	14.8861	15.819	-0.0883515	N	down	No	No	9.34293	10.2038	12.6024	12.8377	15.2766	16.755	-0.147685	N	down	9.47871	9.32867	12.1923	12.8377	15.2913	15.38	-0.0150955	N	down	10.1039	10.2211	14.0566	12.8377	16.6397	16.8169	-0.0281339	N	down	Klla0A	253619
KLLA0A02893g	NA	NA	NA	NA	NA	SAKL0A08998g	XP_716307.1;XP_716368.1	XP_663320.1	NP_594030.1	50.2423	62.4906	57.3736	73.4234	72.0228	86.2669	-0.260648	N	down	No	No	70.0595	72.5388	94.5899	90.5455	114.62	118.158	-0.0452976	N	down	62.1005	66.3185	80.2839	90.5455	100.721	108.462	-0.109589	N	down	73.0593	72.6662	100.846	90.5455	119.405	118.595	0.00616714	N	up	Klla0A	256320
KLLA0A02915g	YKR006C	XP_003957134.1	XP_003673437.1	XP_001642170.1	NP_984571.1	SAKL0A09020g	NA	NA	NA	139.016	147.027	59.3661	65.3297	74.4615	76.7501	-0.0441667	N	down	No	No	366.761	230.274	168.207	98.0855	203.85	128.035	0.669962	N	up	139.315	210.523	62.1926	98.0855	77.9958	117.528	-0.592014	N	down	483.278	230.654	227.155	98.0855	268.932	128.509	1.06359	Y	up	Klla0A	258504
KLLA0A02937g	YKR007W	XP_003957135.1	XP_003673436.1	XP_001642169.1	NP_984570.2	SAKL0A09042g	XP_719486.1;XP_719611.1	NA	NA	171.662	128.626	34.8568	27.5047	43.6884	32.313	0.434206	N	up	No	No	225.541	185.625	46.0874	34.9948	55.8522	45.7048	0.295199	N	up	154.457	169.699	30.4052	34.9948	38.1631	41.9534	-0.13435	N	down	196.105	185.914	41.353	34.9948	48.9546	45.8737	0.0983144	N	up	Klla0A	259865
KLLA0A02959g	YKR008W	XP_003957136.1	XP_003673435.1	XP_001642168.1	NP_984569.1	SAKL0A09064g	XP_719490.1;XP_719615.1	NA	NP_595432.1;NP_595432.1	37.5164	51.125	37.869	51.8486	47.3419	60.9255	-0.36477	N	down	No	No	55.4211	50.0615	64.7143	53.9173	78.4476	70.3613	0.149666	N	up	43.6641	45.7684	48.5013	53.9173	60.8834	64.5874	-0.0904127	N	down	53.0077	50.1482	63.0654	53.9173	74.6547	70.6215	0.0733641	N	up	Klla0A	260627
KLLA0A02981g	YPR007C	XP_003955627.1	XP_003673310.1	XP_001647011.1	NP_984568.2	SAKL0B03234g	XP_713586.1;XP_713586.1;XP_713586.1;XP_713586.1;XP_713623.1;XP_713623.1;XP_713623.1;XP_713623.1	NA	NP_596059.1	8.30996	10.5806	9.60948	12.6028	12.1529	14.811	-0.284358	N	down	No	No	7.05238	8.52673	9.77694	11.019	11.8403	14.4074	-0.237029	N	down	7.74411	7.79453	10.2506	11.019	12.8533	13.2246	-0.0161504	N	down	8.71927	8.53706	12.2753	11.019	14.5275	14.4606	0.0345598	N	up	Klla0A	262440
KLLA0A03003g	YFR008W	XP_003956454.1	XP_003673801.1	XP_001643352.1	NP_984567.2	SAKL0B03256g	NA	XP_658614.1	NA	42.1475	40.7422	15.5677	15.6868	19.5612	18.4333	0.0849834	N	up	No	No	55.1706	52.323	20.0141	17.5322	24.2597	22.8826	0.0739478	N	up	46.1518	47.835	15.6595	17.5322	19.6447	21.0048	-0.102911	N	down	53.6135	52.4092	19.6572	17.5322	23.2686	22.9672	0.00774074	N	up	Klla0A	264785
KLLA0A03025g	YER145C	NA	XP_003673336.1	XP_001646295.1	NP_984566.1;NP_986795.1	SAKL0B03322g;SAKL0H18920g	XP_715020.1;XP_715031.1	NA	NP_594493.1	605.305	1012.99	376.059	685.424	475.578	805.571	-0.760264	N	down	No	No	757.942	1008.33	590.242	721.122	715.227	941.34	-0.39619	N	down	775.36	921.838	577.769	721.122	724.701	864.087	-0.253877	N	down	874.103	1009.98	691.561	721.122	818.728	944.821	-0.206889	N	down	Klla0A	266917
KLLA0A03047g	YGL166W;YPR008W	XP_003955628.1	XP_003673457.1;XP_003675028.1	XP_001643351.1;XP_001645645.1	NP_984565.1	SAKL0B03344g	XP_722205.1;XP_722319.1	XP_658262.1	NP_588223.1;NP_592923.1	68.9995	61.7315	74.0942	69.9412	93.2277	82.1746	0.182015	N	up	No	No	60.8705	67.8091	72.5703	74.302	87.9539	96.9713	-0.143832	N	down	65.5633	61.9937	75.1049	74.302	94.2138	89.0136	0.079356	N	up	61.0494	67.9247	73.9018	74.302	87.4818	97.3299	-0.158406	N	down	Klla0A	269553
KLLA0A03069g	YGL163C	XP_003956451.1	XP_003673455.1	XP_001645646.1	NP_984563.2	SAKL0B03388g	XP_722208.1;XP_722322.1	XP_663131.1	NP_594290.1	25.5504	17.5783	43.7059	30.7449	54.3578	36.1228	0.588725	N	up	No	No	17.8805	13.1899	34.7076	23.6548	42.0458	30.8612	0.442542	N	up	12.6137	12.059	23.2874	23.6548	29.1839	28.3289	0.0372452	N	up	12.2628	13.2137	24.2203	23.6548	28.6724	30.9753	-0.126834	N	down	Klla0A	271516
KLLA0A03091g	YPR009W;YGL162W	XP_003956450.1	XP_003675029.1;XP_003675782.1	XP_001645648.1	NP_984562.2	SAKL0B03432g	XP_720647.1;XP_720774.1	XP_658467.1	NA	63.5155	46.4724	52.9804	40.4659	65.8052	47.5528	0.468183	N	up	No	No	187.716	117.353	144.894	84.3842	175.636	109.839	0.672651	N	up	41.4113	107.308	31.1196	84.3842	39.0037	100.831	-1.37299	Y	down	53.2192	117.641	42.3404	84.3842	50.1355	110.246	-1.14114	Y	down	Klla0A	276333
KLLA0A03113g	YGL161C	XP_003956449.1	XP_003675781.1	XP_001643349.1	NP_984561.1	SAKL0B03454g	XP_722133.1;XP_722247.1	XP_661621.1	NP_592960.1	198.573	147.175	74.3495	57.6953	93.8941	67.7904	0.470093	N	up	No	No	172.088	165.943	84.9093	74.9605	102.911	97.9184	0.075023	N	up	179.237	151.703	84.4189	74.9605	105.942	89.8812	0.239715	N	up	132.13	166.186	67.0691	74.9605	79.4019	98.2802	-0.303762	N	down	Klla0A	277880
KLLA0A03135g	YGL169W	XP_003956458.1	XP_003675780.1	XP_001645650.1	NP_984560.1	SAKL0B03498g	XP_720379.1	XP_663683.1	NP_588044.1	25.9923	38.4451	18.1957	27.6085	22.767	32.4375	-0.511903	N	down	No	No	49.4434	46.1699	40.4285	34.4491	48.9843	44.9833	0.129994	N	up	38.6846	42.2082	29.8438	34.4491	37.4429	41.2914	-0.140039	N	down	52.5674	46.2395	43.4656	34.4491	51.4677	45.1496	0.191163	N	up	Klla0A	279951
KLLA0A03157g	YGL167C	XP_003955629.1	XP_003675779.1	XP_001645651.1	NP_984559.2	SAKL0B03520g	XP_720380.1	XP_680733.1	NP_595098.1	72.2953	64.8842	117.669	110.9	148.553	130.309	0.189122	N	up	No	No	75.3426	75.0758	153.752	140.977	186.302	184.104	0.0189974	N	up	60.9757	68.6343	118.459	140.977	148.617	168.993	-0.184672	N	down	83.3202	75.1907	173.372	140.977	205.273	184.784	0.152562	N	up	Klla0A	281313
KLLA0A03179g	YGR023W;YLR332W	XP_003955225.1	XP_003678405.1	XP_001643128.1;XP_001644622.1	NA	SAKL0B03608g	NA	NA	NA	106.145	150.631	69.3681	103.804	87.0475	121.976	-0.487015	N	down	No	No	112.924	145.498	75.638	89.5411	91.6726	116.959	-0.348666	N	down	132.508	133.013	85.6557	89.5411	107.529	107.359	0.00369094	N	up	159.75	145.714	109.753	89.5411	129.92	117.391	0.148902	N	up	Klla0A	285228
KLLA0A03201g	NA	XP_003959175.1	NA	XP_001644368.1	NA	SAKL0B03586g	XP_714381.1;XP_721168.1;XP_721440.1	XP_661331.1	NA	168.823	130.827	115.971	96.3397	144.786	113.188	0.354892	N	up	No	No	267.266	190.061	204.381	134.072	247.474	174.96	0.501268	N	up	152.416	173.763	110.421	134.072	138.718	160.603	-0.213635	N	down	164.782	190.392	128.285	134.072	151.91	175.607	-0.211176	N	down	Klla0A	287031
KLLA0A03223g	YDL199C	XP_003958715.1	NA	NA	NA	SAKL0H12518g	XP_715082.1;XP_715133.1;XP_723067.1;XP_723214.1	XP_660269.1;XP_662708.1	NA	16.3431	6.39572	17.5934	7.31076	22.183	8.59222	1.36855	Y	up	No	No	15.1731	9.18627	22.2285	12.1549	26.9378	15.8709	0.76702	N	up	8.05769	8.39815	11.1303	12.1549	13.9625	14.5683	-0.0602407	N	down	7.61329	9.20064	11.4332	12.1549	13.538	15.9295	-0.232166	N	down	Klla0A	290002
KLLA0A03245g	YDL201W	XP_003957554.1	XP_003675619.1	XP_001642430.1	NP_986858.1	SAKL0H12496g	XP_717203.1;XP_717279.1	XP_661264.1	NP_588028.1	55.8854	100.708	23.851	43.1842	29.6398	50.7321	-0.776702	N	down	No	No	144.867	94.0685	74.7833	44.6635	90.5639	58.2815	0.637394	N	up	60.5233	86.0021	29.9521	44.6635	37.5805	53.4989	-0.515163	N	down	172.78	94.2341	91.2864	44.6635	108.068	58.497	0.8775	N	up	Klla0A	292179
KLLA0A03267g	YDL202W	XP_003958713.1	XP_003675618.1	XP_001642431.1	NP_986859.1	SAKL0H12474g	XP_717202.1;XP_717278.1	XP_661239.1	NP_592915.1	96.479	123.472	45.6793	60.5538	57.2957	71.1615	-0.313092	N	down	No	No	279.81	220.814	127.178	92.1191	154.108	120.229	0.35719	N	up	150.717	201.876	65.334	92.1191	81.9223	110.363	-0.430944	N	down	320.232	221.19	148.298	92.1191	175.546	120.674	0.537518	N	up	Klla0A	293329
KLLA0A03289g	YJR149W	NA	NA	NA	NA	SAKL0C07524g	XP_715252.1	XP_661459.1;XP_661872.1;XP_663458.1;XP_663635.1;XP_682070.1	NA	7.20677	1.4111	5.24027	1.11144	6.59261	1.30684	2.33298	Y	up	No	No	11.8088	5.80345	8.90841	4.13196	10.8011	5.38924	0.957576	N	up	6.05169	5.30596	3.99158	4.13196	5.01341	4.94705	-0.0150024	N	down	10.0578	5.81436	7.53993	4.13196	8.92399	5.40918	0.68334	N	up	Klla0A	294825
KLLA0A03311g	NA	NA	NA	NA	NA	NA	XP_714758.1;XP_714818.1	NA	NA	16.5852	16.8953	9.55585	9.6854	12.0361	11.3832	0.0804043	N	up	No	No	35.2232	25.4895	23.2451	15.7773	28.2076	20.5995	0.432299	N	up	19.7105	23.3031	12.5058	15.7773	15.7238	18.9089	-0.27247	N	down	33.604	25.5313	22.8744	15.7773	27.0768	20.6757	0.386384	N	up	Klla0A	296290
KLLA0A03333g	YAL054C	XP_003958937.1	XP_003673702.1;XP_003675660.1	XP_001645141.1	NP_984503.1	SAKL0D14608g	XP_713668.1;XP_713713.1;XP_714347.1;XP_714389.1	XP_663230.1	NP_588291.2	68.4149	11.8958	98.7018	18.4351	125.744	21.6631	2.53733	Y	up	Yes	No	19.6874	32.0219	30.3072	45.4138	36.7112	59.2678	-0.684487	N	down	24.0123	29.2759	34.9848	45.4138	43.8759	54.4042	-0.313586	N	down	12.9968	32.0776	20.2736	45.4138	23.9998	59.487	-1.31698	Y	down	Klla0A	297542
KLLA0A03355g	YAL053W	XP_003958938.1	XP_003673701.1	XP_001643609.1	NP_984502.2	SAKL0D14586g	XP_710428.1;XP_710432.1;XP_715980.1;XP_716038.1	XP_659554.1	NP_594489.1	108.412	129.877	163.397	206.5	206.16	242.673	-0.235185	N	down	No	No	93.185	105.054	160.167	166.203	194.172	217.083	-0.160999	N	down	90.07	96.0393	147.407	166.203	184.961	199.265	-0.106594	N	down	90.224	105.21	157.702	166.203	186.696	217.885	-0.221613	N	down	Klla0A	301465
KLLA0A03377g	YAL049C	XP_003956625.1	XP_003678040.1	XP_001645139.1	NP_984501.1	SAKL0D14564g	XP_722681.1;XP_722684.1;XP_722827.1;XP_722830.1	XP_661316.1	NP_592786.1;NP_596271.1	452.374	245.227	201.59	119.173	254.085	140.035	0.859516	N	up	No	No	345.267	358.996	152.048	146.394	184.319	191.19	-0.0529055	N	down	327.973	328.194	139.34	146.394	174.862	175.498	-0.00464234	N	down	281.867	359.543	126.994	146.394	150.343	191.897	-0.351021	N	down	Klla0A	304117
KLLA0A03399g	NA	NA	NA	NA	NA	SAKL0B01848g;SAKL0B01870g	NA	NA	NA	26.3959	14.3137	39.7101	21.8563	50.0856	25.6801	0.963728	N	up	No	No	20.9815	13.1116	38.3478	22.3769	46.4649	29.2155	0.67351	N	up	11.3664	11.9867	19.9589	22.3769	25.043	26.8177	-0.0999926	N	down	22.918	13.1323	42.8538	22.3769	50.7257	29.3235	0.787783	N	up	Klla0A	305616
KLLA0A03421g	YOR363C	XP_003956624.1	NA	NA	NA	SAKL0D14542g	XP_710938.1;XP_714604.1;XP_714734.1;XP_715866.1;XP_715916.1;XP_721762.1;XP_723055.1;XP_723202.1;XP_723264.1;XP_723453.1	XP_657752.1;XP_658137.1;XP_658342.1;XP_658457.1;XP_658481.1;XP_658506.1;XP_658633.1;XP_659203.1;XP_659424.1;XP_659424.1;XP_659428.1;XP_659452.1;XP_659740.1;XP_660007.1;XP_660219.1;XP_660389.1;XP_660654.1;XP_660873.1;XP_660960.1;XP_660995.1;XP_661372.1;XP_661504.1;XP_661851.1;XP_662644.1;XP_663412.1;XP_663453.1;XP_663822.1;XP_664392.1;XP_664450.1;XP_664677.1;XP_680492.1;XP_680612.1;XP_680776.1;XP_…	NP_001018765.1;NP_593001.1;NP_593664.2;NP_596766.1	25.0113	21.9153	40.5716	36.4529	51.2587	42.8368	0.259395	N	up	No	No	23.329	24.3149	45.0786	43.2916	54.6428	56.5407	-0.0479617	N	down	23.3861	22.2285	43.3793	43.2916	54.3918	51.9	0.0714596	N	up	26.3304	24.3514	51.907	43.2916	61.453	56.7497	0.119018	N	up	Klla0A	308414
KLLA0A03443g	YAL051W;YOR363C	XP_003956624.1;XP_003958939.1	XP_003673700.1;XP_003678041.1	XP_001645140.1	NP_984498.2	SAKL0D14520g;SAKL0D14542g	NA	XP_657992.1;XP_658137.1;XP_658342.1;XP_658457.1;XP_658481.1;XP_658633.1;XP_658738.1;XP_658972.1;XP_659340.1;XP_659424.1;XP_659424.1;XP_659424.1;XP_659424.1;XP_659620.1;XP_660007.1;XP_660219.1;XP_660389.1;XP_660430.1;XP_660654.1;XP_660989.1;XP_661372.1;XP_661504.1;XP_661700.1;XP_661851.1;XP_663213.1;XP_663412.1;XP_663528.1;XP_664351.1;XP_664392.1;XP_664450.1;XP_664767.1;XP_680601.1;XP_680612.1;XP_…	NP_593664.2;NP_594000.1;NP_595318.2;NP_596766.1	26.3586	16.7811	44.5135	29.3914	56.5747	34.5374	0.712707	N	up	No	No	16.9681	18.6523	36.0986	36.5356	43.7729	47.7182	-0.129661	N	down	19.1183	17.0518	38.8795	36.5356	48.8086	43.8016	0.158144	N	up	16.7174	18.6802	36.3295	36.5356	43.0149	47.8945	-0.149234	N	down	Klla0A	311628
KLLA0A03465g	YAL048C	XP_003958940.1	XP_003673688.1;XP_003673699.1	XP_001643607.1	NP_984497.1	SAKL0D14498g	XP_718876.1;XP_718978.1	XP_661771.1	NP_587725.1	53.3742	36.9144	61.8421	44.5753	78.2065	52.3789	0.578649	N	up	No	No	42.4641	56.5506	59.1845	72.3533	71.768	94.5021	-0.400843	N	down	57.0825	51.6978	76.3635	72.3533	95.7852	86.7455	0.145509	N	up	46.5181	56.6341	66.4271	72.3533	78.6387	94.8513	-0.267423	N	down	Klla0A	314573
KLLA0A03487g	YOR362C	XP_003956626.1	XP_003678039.1	XP_001645138.1	NP_984496.1	SAKL0D14476g	XP_720905.1;XP_721418.1	XP_663397.1	NP_588040.1	248.26	173.962	167.106	126.489	210.829	148.626	0.504394	N	up	No	No	279.412	267.521	186.29	164.83	225.823	215.228	0.0688116	N	up	277.083	244.57	177.329	164.83	222.558	197.564	0.17181	N	up	272.703	267.94	185.754	164.83	219.912	216.024	0.025917	N	up	Klla0A	316951
KLLA0A03509g	YAL047C	XP_003958941.1	XP_003673689.1	XP_001643606.1	NP_984495.2	SAKL0D14454g	XP_720906.1;XP_721419.1	NA	NA	13.3444	13.3461	20.329	20.0999	25.3921	23.6219	0.102968	N	up	No	No	16.6581	14.463	27.6754	22.2724	33.5476	29.0759	0.200008	N	up	13.0173	13.2224	20.7654	22.2724	26.0462	26.6897	-0.0370085	N	down	14.9019	14.4867	25.354	22.2724	30.0139	29.1834	0.0355244	N	up	Klla0A	318067
KLLA0A03531g	YOR361C	XP_003956627.1	XP_003678038.1	XP_001645137.1	NP_984494.1	SAKL0D14432g	XP_720907.1;XP_721420.1	XP_657963.1	NP_594528.1	66.8038	140.498	103.033	224.435	128.491	263.703	-1.0375	Y	down	No	No	124.878	140.864	198.158	206.521	240.154	269.55	-0.167236	N	down	127.353	128.782	194.978	206.521	244.589	247.43	-0.0173872	N	down	155.077	141.1	251.082	206.521	297.266	270.547	0.134688	N	up	Klla0A	320828
KLLA0A03553g	YAL046C	XP_003958942.1	XP_003673690.1	XP_001643605.1	NP_984493.1	SAKL0D14410g	XP_720908.1;XP_721421.1	XP_661290.1	NP_588079.1	436.806	163.757	30.851	13.073	39.0349	15.36	1.34586	Y	up	No	No	449.986	313.286	38.4883	23.792	46.654	31.0582	0.580726	N	up	199.166	286.419	16.8042	23.792	21.0693	28.5093	-0.436854	N	down	468.378	313.827	39.7523	23.792	47.0513	31.173	0.587483	N	up	Klla0A	323382
KLLA0A03575g	YAL044W-A	XP_003959534.1	XP_003673691.1	XP_001643604.1	NP_984492.1	SAKL0D14388g	XP_722220.1;XP_722334.1	NA	NP_595788.1	250.091	176.491	33.3807	24.7367	42.0599	29.067	0.532903	N	up	No	No	342.044	255.058	51.7047	36.448	62.6565	47.5956	0.401054	N	up	217.435	233.18	31.2877	36.448	39.2385	43.6892	-0.152368	N	down	326.265	255.478	51.5784	36.448	61.0524	47.7715	0.354884	N	up	Klla0A	323999
KLLA0A03597g	YAL044C	XP_003959535.1	XP_003673692.1	XP_001645136.1	NP_984491.2	SAKL0D14366g	XP_722210.1;XP_722324.1	XP_658678.1	NP_596169.1	960.093	785.89	294.425	258.087	372.163	303.258	0.295439	N	up	No	No	1011.02	984.447	297.12	266.774	360.106	348.367	0.0481156	N	up	923.149	899.979	263.541	266.774	330.683	319.775	0.0485745	N	up	887.445	985.944	269.749	266.774	319.397	349.655	-0.130182	N	down	Klla0A	324491
KLLA0A03619g	YOR360C	XP_003956628.1	XP_003678037.1	XP_001643603.1	NP_984490.2	SAKL0D14344g	XP_721199.1;XP_721471.1	XP_660344.1	NP_592764.1;NP_592774.1;NP_595031.1;NP_596865.1	98.7774	82.4289	79.7782	66.9442	100.153	78.6725	0.348042	N	up	No	No	76.2222	58.0637	83.0241	58.4319	100.686	76.3218	0.397248	N	up	57.1112	53.0809	59.8073	58.4319	75.0419	70.0574	0.102011	N	up	127.822	58.1488	143.034	58.4319	169.353	76.6038	1.14824	Y	up	Klla0A	326530
KLLA0A03641g	YOR359W	XP_003956629.1;XP_003956629.1;XP_003956629.1;XP_003956629.1	XP_003678036.1	XP_001643602.1	NP_984489.2	SAKL0D14322g	XP_721200.1;XP_721472.1	XP_658010.1	NP_596258.1	100.235	126.648	74.5364	99.4387	93.578	116.84	-0.320486	N	down	No	No	124.291	137.954	118.538	121.027	143.643	157.982	-0.137197	N	down	131.49	126.121	120.5	121.027	151.279	145.017	0.0593696	N	up	155.38	138.183	151.1	121.027	178.868	158.566	0.172112	N	up	Klla0A	328807
KLLA0A03663g	YAL043C	XP_003959536.1	XP_003673693.1;XP_003673693.1	XP_001645135.1	NP_984488.1	SAKL0D14300g	XP_720334.1	XP_659060.1	NP_594351.2	29.5789	32.9492	43.2054	49.7439	54.7074	58.453	-0.0949069	N	down	No	No	25.8356	27.7524	46.6517	46.0097	56.5192	60.0691	-0.0819569	N	down	27.1496	25.3716	46.7486	46.0097	58.7271	55.1392	0.0881862	N	up	29.1386	27.7966	53.708	46.0097	63.5855	60.2911	0.0753206	N	up	Klla0A	331039
KLLA0A03696g	YOR358W	XP_003956630.1	XP_003678035.1	XP_001645134.1	NP_984487.1	SAKL0D14278g	XP_715679.1;XP_715735.1	XP_664096.1	NP_596412.1	127.476	127.619	28.3526	29.8073	35.5825	35.0248	0.0219999	N	up	No	No	135.635	131.565	32.6775	30.3277	39.5961	39.6097	0.00866133	N	up	127.981	120.278	29.7365	30.3277	37.3197	36.3586	0.0405911	N	up	136.05	131.772	33.5359	30.3277	39.7011	39.756	0.00317619	N	up	Klla0A	334065
KLLA0A03718g	YOR357C	XP_003956631.1	XP_003678034.1	XP_001645133.1	NP_984486.2	SAKL0D14256g	XP_717576.1;XP_717650.1	XP_662402.1	NP_596480.1	108.094	107.84	26.3597	28.5768	33.3509	33.5834	-0.00911408	N	down	No	No	114.928	166.521	31.0004	41.0892	37.5473	53.6743	-0.497971	N	down	149.406	152.23	38.5803	41.0892	48.3993	49.2687	-0.0204469	N	down	104.976	166.758	29.1396	41.0892	34.4964	53.8726	-0.636019	N	down	Klla0A	334828
KLLA0A03740g	YHR050W;YOL122C	XP_003956295.1;XP_003959253.1	XP_003675815.1	XP_001644182.1	NP_983937.1	SAKL0C12650g	XP_714798.1;XP_714860.1;XP_719516.1;XP_719640.1;XP_722225.1;XP_722339.1;XP_722757.1;XP_722902.1	XP_663237.1	NP_594537.1	270.252	327.631	261.749	342.57	333.002	402.557	-0.273574	N	down	No	No	165.893	181.283	205.976	206.994	249.698	270.426	-0.114425	N	down	207.474	165.724	246.992	206.994	310.169	248.229	0.322079	N	up	226.754	181.54	287.243	206.994	340.086	271.425	0.327023	N	up	Klla0A	335548
KLLA0A03806g	YDR477W	XP_003956712.1	XP_003673747.1	XP_001643874.1;XP_001647391.1	NP_984631.1	SAKL0G06952g	XP_715642.1;XP_715699.1	NA	NP_588376.1	38.3629	50.2294	43.936	59.5685	55.3295	69.9916	-0.339319	N	down	No	No	53.9686	57.1689	69.2537	67.1728	83.9876	87.6744	-0.0711368	N	down	57.6809	52.2654	71.2805	67.1728	89.3824	80.4795	0.149769	N	up	56.4031	57.2639	73.7916	67.1728	87.3529	87.9986	-0.0147518	N	down	Klla0A	338807
KLLA0A03883g	YAL030W;YOR327C	XP_003956894.1	XP_003678028.1	XP_001643653.1	NP_984451.1	SAKL0B10296g	XP_719535.1;XP_719659.1	XP_682038.1	NP_594120.1	399.441	291.192	97.1002	76.6588	122.189	90.0777	0.439801	N	up	No	No	374.931	374.952	109.587	100.431	132.806	131.158	0.0201291	N	up	313.715	342.781	86.8384	100.431	108.99	120.393	-0.142938	N	down	341.474	375.528	102.09	100.431	120.88	131.643	-0.121424	N	down	Klla0A	344642
KLLA0A03905g	YOR326W	XP_003956895.1	XP_003678027.1	NA	NP_984450.1	SAKL0B10274g	XP_722219.1;XP_722333.1	XP_682131.1	NP_588492.1;NP_596233.1	44.2774	48.8759	137.853	155.879	173.969	183.173	-0.0742854	N	down	No	No	40.8629	48.2143	142.159	154.566	172.311	201.798	-0.228541	N	down	45.7201	44.0783	152.847	154.566	191.803	185.236	0.0498778	N	up	37.4708	48.2919	132.975	154.566	157.413	202.544	-0.364272	N	down	Klla0A	345818
KLLA0A03938g	YAL028W	XP_003956896.1;XP_003959551.1	XP_003677012.1;XP_003678026.1	XP_001643654.1	NP_984449.2	SAKL0B10252g	NA	NA	NA	26.4486	25.0868	19.5027	18.9615	24.6176	22.2806	0.144154	N	up	No	No	25.6166	36.1479	21.5866	28.7099	26.1632	37.4893	-0.517256	N	down	30.572	33.0467	25.0733	28.7099	31.4583	34.4124	-0.128276	N	down	27.8746	36.2045	24.1689	28.7099	28.6027	37.6278	-0.397186	N	down	Klla0A	351240
KLLA0A03960g	YAL027W	XP_003959552.1	XP_003677011.1	XP_001642568.1	NP_984448.2	SAKL0B10230g	NA	NA	NA	33.4139	37.9232	16.5694	19.8823	20.8967	23.3665	-0.160964	N	down	No	No	40.0538	40.0313	24.9951	22.8613	30.29	29.8993	0.0376691	N	up	51.1599	36.5929	30.3492	22.8613	38.0848	27.4445	0.488533	N	up	40.6679	40.0757	25.2836	22.8613	29.9353	30.0097	0.0168267	N	up	Klla0A	352856
KLLA0A03982g	YOR323C	XP_003956897.1	XP_003678053.1	XP_001642569.1	NP_984447.2	SAKL0B10208g	XP_719758.1;XP_719875.1	XP_663403.1	NP_593164.1	195.049	139.766	152.652	113.911	193.494	133.839	0.531959	N	up	No	No	192.814	191.855	174.142	159.684	211.106	208.572	0.0176712	N	up	202.119	175.392	174.262	159.684	218.636	191.452	0.192582	N	up	185.025	192.139	169.668	159.684	200.871	209.343	-0.0581562	N	down	Klla0A	354208
KLLA0A04015g	YAL026C	XP_003959553.1	XP_003677010.1	XP_001643655.1	NP_984446.2	SAKL0B10186g	XP_719757.1;XP_719874.1	XP_663716.1	NP_596486.1	36.1466	35.8938	87.0972	89.2458	110.136	104.87	0.0709281	N	up	No	No	29.4194	36.4102	87.4957	99.7137	106.051	130.2	-0.296145	N	down	30.9583	33.2864	88.5444	99.7137	111.058	119.514	-0.105239	N	down	34.7169	36.4672	105.573	99.7137	124.992	130.682	-0.063901	N	down	Klla0A	355624
KLLA0A04037g	YAL025C	XP_003956898.1	XP_003678054.1	XP_001642570.1	NP_984445.1	SAKL0B10164g	XP_711491.1;XP_711515.1	XP_664216.1	NP_593145.1	47.1132	97.4069	28.846	60.0834	35.8677	70.5926	-0.97769	N	down	No	No	137.628	95.352	80.0669	52.078	97.0478	67.9247	0.505897	N	up	55.1611	87.1785	30.56	52.078	38.3123	62.3515	-0.707057	N	down	206.541	95.5333	122.66	52.078	145.222	68.176	1.08147	Y	up	Klla0A	359981
KLLA0A04059g	YAL024C	XP_003959554.1	XP_003677006.1	XP_001642571.1;XP_001642571.1	NP_983694.1	SAKL0B10142g	XP_714770.1;XP_714830.1	XP_660696.1	NA	19.4809	17.7966	52.7785	49.0191	66.4323	57.5996	0.20567	N	up	No	No	22.7826	21.7963	69.6995	60.9186	84.4946	79.5581	0.0862787	N	up	18.9607	19.9261	55.0254	60.9186	69.0388	73.0283	-0.0792745	N	down	20.3001	21.8295	63.0769	60.9186	74.6727	79.8521	-0.0944655	N	down	Klla0A	361328
KLLA0A04081g	NA	NA	NA	NA	NA	SAKL0B10120g	XP_722226.1;XP_722340.1	XP_658415.1	NP_587688.1	10.9907	3.19879	9.69953	3.01104	12.2956	3.53786	1.79669	Y	up	No	No	11.139	6.18422	11.9051	6.17945	14.4428	8.06519	0.802574	N	up	5.60394	5.65382	5.82114	6.17945	7.29482	7.40333	-0.0255471	N	down	9.48311	6.19462	10.5875	6.17945	12.5299	8.09501	0.612976	N	up	Klla0A	366969
KLLA0A04103g	YOR322C	XP_003956899.1	XP_003678055.1	XP_001642572.1;XP_001643656.1	NP_983693.1	SAKL0B10098g	XP_711201.1;XP_711224.1	XP_657660.1	NP_594331.1;NP_595744.1	21.2161	33.5631	37.3675	61.6837	47.2115	72.4713	-0.61811	N	down	No	No	28.1379	39.2565	47.7532	61.1446	57.8999	79.8252	-0.47086	N	down	36.0594	35.8891	58.7814	61.1446	73.7206	73.274	0.0084654	N	up	31.4302	39.3203	54.2822	61.1446	64.2703	80.1203	-0.319228	N	down	Klla0A	369258
KLLA0A04125g	NA	NA	NA	NA	NA	SAKL0H12980g	XP_720555.1;XP_720682.1	XP_660689.1;XP_663168.1	NP_593238.1	18.8828	7.64247	23.1356	9.98456	29.3693	11.7275	1.32429	Y	up	Yes	No	19.0796	30.4302	24.2791	35.8293	29.4328	46.8103	-0.666359	N	down	33.5346	27.8186	40.7318	35.8293	51.1271	42.9679	0.256625	N	up	4.41888	30.4739	5.7476	35.8293	6.80367	46.9832	-2.7791	Y	down	Klla0A	372826
KLLA0A04147g	YDR214W	XP_003956066.1	XP_003674743.1	XP_001644492.1	NP_986576.1	SAKL0H13002g	XP_719364.1	XP_663206.1	NP_595881.1	98.83	144.155	60.0337	91.8624	75.5138	107.939	-0.515643	N	down	No	No	236.354	200.702	169.722	133.802	205.71	174.649	0.234887	N	up	162.565	183.488	111.899	133.802	140.339	160.316	-0.192714	N	down	290.794	201.039	213.581	133.802	252.837	175.295	0.526745	N	up	Klla0A	374897
KLLA0A04169g	YLR228C;YDR213W	XP_003956065.1;XP_003958725.1	XP_003674744.1;XP_003675629.1	XP_001644493.1;XP_001645999.1	NP_986575.1	SAKL0H13024g	XP_711879.1;XP_711908.1	XP_657968.1;XP_658532.1;XP_658532.1;XP_659433.1;XP_660679.1;XP_661110.1;XP_661110.1;XP_661110.1;XP_661110.1;XP_661472.1;XP_662774.1;XP_662786.1;XP_662786.1;XP_662994.1;XP_663213.1;XP_663453.1;XP_663474.1;XP_663528.1;XP_664441.1;XP_664450.1;XP_681192.1;XP_681372.1;XP_681798.1;XP_682022.1;XP_682242.1;XP_682379.1;XP_682419.1	NP_593001.1;NP_593160.2;NP_595543.1;NP_596242.3	113.933	133.744	185.919	230.203	234.54	270.467	-0.205597	N	down	No	No	64.3968	119.149	108.35	184.343	131.432	240.827	-0.876695	N	down	134.912	108.923	218.255	184.343	273.923	221.06	0.310461	N	up	63.9079	119.318	109.382	184.343	129.514	241.717	-0.898143	N	down	Klla0A	376273
KLLA0A04191g	YDR212W	XP_003956064.1	XP_003674745.1	XP_001645998.1	NP_986574.2	SAKL0H13046g	XP_711889.1;XP_711918.1	XP_659753.1	NP_595949.1	156.956	222.592	167.45	251.485	211.907	295.5	-0.479588	N	down	No	No	202.587	257.943	237.133	278.168	287.471	363.202	-0.33802	N	down	254.721	235.814	286.656	278.168	359.766	333.393	0.109717	N	up	220.344	258.35	263.278	278.168	311.687	364.544	-0.226023	N	down	Klla0A	379492
KLLA0A04213g	YLR229C	XP_003956063.1	XP_003674746.1	XP_001644494.1	NP_986573.1	SAKL0H13068g	XP_711878.1;XP_711907.1	XP_662347.1;XP_680756.1	NP_593536.1	357.5	211.327	102.797	62.9696	129.827	73.9916	0.811287	N	up	No	No	270.167	265.367	89.5168	80.5996	108.495	105.287	0.0465159	N	up	259.582	242.594	82.102	80.5996	103.061	96.645	0.0947995	N	up	233.764	265.754	78.5162	80.5996	92.9525	105.676	-0.181345	N	down	Klla0A	382243
KLLA0A04235g	YDR211W	XP_003956062.1	XP_003674748.1	XP_001645997.1	NP_986572.1	SAKL0H13090g	XP_711895.1;XP_711924.1	NA	NP_594285.1	60.159	102.282	82.9553	145.05	104.499	170.438	-0.705801	N	down	No	No	85.7844	104.355	137.167	153.102	166.291	199.886	-0.267102	N	down	95.9706	95.4025	146.287	153.102	183.564	183.481	0.00028525	N	up	102.02	104.522	166.081	153.102	196.647	200.625	-0.0291429	N	down	Klla0A	383275
KLLA0A04301g	YDR208W	XP_003956060.1	XP_003674750.1	XP_001643104.1;XP_001645452.1	NP_986571.1	SAKL0H13200g	XP_710436.1;XP_710444.1	XP_660370.1	NP_594429.1	18.9943	18.7983	25.1235	25.6128	31.6919	30.0969	0.0746115	N	up	No	No	18.1659	19.2592	28.3074	27.5662	34.3049	36.0082	-0.0602861	N	down	16.9519	17.6064	25.287	27.5662	31.7288	33.0527	-0.0531124	N	down	18.4726	19.2873	29.2785	27.5662	34.6661	36.1413	-0.0508037	N	down	Klla0A	387006
KLLA0A04323g	YOR383C	NA	NA	NA	NA	NA	NA	NA	NA	51.4753	64.4857	24.3166	33.4707	30.7523	39.3362	-0.354392	N	down	No	No	111.821	89.7009	43.5085	32.9553	52.734	43.0174	0.289256	N	up	88.8353	82.0077	33.7489	32.9553	42.4183	39.4872	0.0982236	N	up	106.871	89.8528	42.7135	32.9553	50.5756	43.1765	0.223791	N	up	Klla0A	391590
KLLA0A04345g	YIL169C	NA	NA	NA	NA	NA	NA	NA	NA	23.7246	24.003	17.5465	19.3102	21.5834	22.6878	-0.0733304	N	down	No	No	48.2068	23.8107	29.7495	13.5791	36.0556	17.713	1.00634	Y	up	21.4223	21.769	12.9598	13.5791	16.2823	16.2596	-0.0159094	N	down	44.3285	23.8529	27.907	13.5791	33.037	17.7785	0.870061	N	up	Klla0A	394997
KLLA0A04367g	YOR382W	NA	NA	NA	NA	NA	NA	NA	NA	44.2641	70.8161	9.1984	15.6042	11.6061	18.339	-0.659277	N	down	No	No	53.6372	60.1898	13.396	13.3718	16.2413	17.4501	-0.124809	N	down	52.7785	55.027	12.7831	13.3718	16.0721	16.0181	-0.00741431	N	down	49.9111	60.2889	12.7618	13.3718	15.1067	17.5146	-0.2288	N	down	Klla0A	397648
KLLA0A04389g	YMR063W	XP_003954606.1	XP_003675877.1	XP_001643585.1	NP_984237.1	SAKL0G18854g	XP_714035.1;XP_714310.1	XP_662457.1	NP_588418.1;NP_593706.1	45.9196	58.4281	12.42	16.7771	15.6685	19.7139	-0.331242	N	down	No	No	29.6946	44.3133	11.7264	16.1331	14.2149	21.0804	-0.558679	N	down	55.2034	40.51	21.1206	16.1331	26.4954	19.35	0.466617	N	up	27.4444	44.3759	11.3144	16.1331	13.3956	21.1583	-0.641356	N	down	Klla0A	400113
KLLA0A04411g	YLR290C	XP_003955054.1	XP_003676248.1	XP_001646054.1	NP_986957.1	SAKL0A07810g	XP_720383.1	XP_659464.1	NP_588508.1	75.463	62.0809	36.6556	31.7833	46.2034	37.3412	0.307053	N	up	No	No	110.328	117.973	56.8684	56.2301	68.9123	73.3975	-0.0910915	N	down	98.268	107.854	48.4813	56.2301	60.8126	67.3741	-0.14974	N	down	108.828	118.166	56.619	56.2301	67.0162	73.6689	-0.141049	N	down	Klla0A	400945
KLLA0A04433g	YLR291C	XP_003955053.1	XP_003676883.1	NA	NP_986958.1	SAKL0A07788g	XP_720949.1;XP_721071.1	XP_658948.1	NP_593435.1	56.1599	121.79	32.3314	71.4408	40.4241	83.9488	-1.05515	Y	down	No	No	88.1065	92.4908	61.8325	60.2134	74.9411	78.5977	-0.0713192	N	down	89.8704	84.5576	60.5235	60.2134	75.9112	72.1475	0.0717483	N	up	117.521	92.6438	84.094	60.2134	99.5511	78.8883	0.332057	N	up	Klla0A	402462
KLLA0A04499g	YOR185C;YLR293C	XP_003955051.1	XP_003676884.1	XP_001643721.1	NP_986960.1	SAKL0A07744g	XP_711485.1;XP_711509.1	XP_663086.1	NP_596827.1	0	0	0	0	NA	NA	NA	NA	NA	No	No	0	0	0	0	NA	NA	NA	NA	NA	0	0	0	0	NA	NA	NA	NA	NA	0	0	0	0	NA	NA	NA	NA	NA	Klla0A	404732
KLLA0A04521g	NA	NA	NA	XP_001646056.1	XP_002999451.1	SAKL0A07722g	NA	NA	NA	0	0	0	0	NA	NA	NA	NA	NA	No	No	0	0	0	0	NA	NA	NA	NA	NA	0	0	0	0	NA	NA	NA	NA	NA	0	0	0	0	NA	NA	NA	NA	NA	Klla0A	405802
KLLA0A04543g	YLR295C	XP_003958408.1	XP_003676885.1	XP_001643722.1	NP_986961.2	SAKL0A07700g	NA	XP_662531.1	NP_595838.1	136.358	140.172	13.8668	15.2632	17.44	17.935	-0.0409114	N	down	No	No	174.798	160.201	18.3911	15.9304	22.3055	20.8027	0.0849532	N	up	129.186	146.453	12.9855	15.9304	16.2856	19.0954	-0.225564	N	down	134.015	160.436	14.6417	15.9304	17.3298	20.8796	-0.268534	N	down	Klla0A	406920
KLLA0A04565g	YLR298C	XP_003955049.1	XP_003676251.1	XP_001643723.1	NP_982684.1	SAKL0A07678g	XP_711484.1;XP_711508.1	XP_659555.1	NP_595384.1	14.3395	17.9964	3.68333	4.79346	4.67784	5.63312	-0.263573	N	down	No	No	24.1	23.5435	6.74703	6.07992	8.18751	7.9452	0.0220427	N	up	20.8084	21.5225	5.58081	6.07992	7.00674	7.29299	-0.0396878	N	down	19.1204	23.5751	5.47592	6.07992	6.47753	7.97455	-0.286321	N	down	Klla0A	407581
KLLA0A04587g	YOR187W	XP_003958407.1	XP_003676886.1	XP_001643724.1	NP_982685.1	SAKL0A07656g	XP_718907.1;XP_719009.1	XP_658688.1	NP_595746.1	31.1396	28.722	30.9249	30.4158	38.902	35.7359	0.122068	N	up	No	No	54.5365	56.7921	54.1638	51.1	65.6308	66.684	-0.0249189	N	down	33.8396	51.9225	31.6515	51.1	39.7016	61.2119	-0.628357	N	down	50.2148	56.8935	49.7497	51.1	58.8962	66.9306	-0.191554	N	down	Klla0A	408699
KLLA0A04609g	YPR015C;YPR013C	XP_003954757.1;XP_003955632.1;XP_003955633.1;XP_003956165.1;XP_003956441.1;XP_003958674.1	XP_003674922.1;XP_003674923.1;XP_003675030.1;XP_003675777.1;XP_003678158.1;XP_003678382.1	XP_001644519.1;XP_001644889.1;XP_001645655.1	NP_984045.1;NP_984054.1;NP_984056.2;NP_984404.1;NP_984784.1;NP_986460.1	SAKL0A09438g;SAKL0A10582g;SAKL0D02618g;SAKL0H20394g;SAKL0H20416g	XP_712574.1;XP_712601.1;XP_722740.1;XP_722886.1	XP_660025.1;XP_682010.1	NP_594479.2	1.8567	1.59801	1.60252	1.40827	2.00152	1.6557	0.268402	N	up	No	No	3.22885	6.00957	2.7291	4.89124	3.30541	6.37498	-0.963296	N	down	3.93998	5.49464	3.29244	4.89124	4.13346	5.85201	-0.545351	N	down	3.5971	6.02192	3.31636	4.89124	3.92751	6.39858	-0.75026	N	down	Klla0A	411494
KLLA0A04620g	NA	NA	NA	NA	NA	NA	NA	NA	NA	56.749	30.3004	4.2923	2.43853	5.44472	2.86636	0.929189	N	up	No	No	70.2522	39.2978	5.75262	3.03298	6.96583	3.96312	0.870769	N	up	30.7632	35.9218	2.44606	3.03298	3.06548	3.6378	-0.21801	N	down	76.8428	39.3388	6.20555	3.03298	7.34491	3.97776	0.905999	N	up	Klla0A	413642
KLLA0A04631g	YBR293W;YDR119W	XP_003955975.1;XP_003955975.1	NA	XP_001646072.1	NP_986741.2	SAKL0H16808g	XP_709949.1;XP_712988.1	XP_659370.1;XP_662802.1	NP_593512.1;NP_593548.1;NP_596009.1;NP_596093.1;NP_596772.1	36.8955	56.3687	32.9572	53.8563	41.6031	63.2833	-0.60479	N	down	No	No	37.7672	38.3151	47.16	43.9883	57.1542	57.4438	-0.00384242	N	down	33.7613	35.0278	40.0878	43.9883	50.3495	52.7291	-0.0674249	N	down	39.9417	38.3745	50.8071	43.9883	60.1486	57.6561	0.063178	N	up	Klla0A	415070
KLLA0A04653g	YGR145W	XP_003958094.1	XP_003673135.1	XP_001644835.1	NP_986015.1	SAKL0H20922g	XP_712114.1;XP_712139.1	XP_659681.1	NP_587709.1	21.3348	57.4685	31.5644	86.1461	39.2943	101.21	-1.36578	Y	down	No	No	45.7883	39.0851	69.5579	54.6404	84.2754	71.2861	0.238398	N	up	26.7762	35.734	38.8786	54.6404	48.7175	65.4367	-0.427737	N	down	88.0003	39.1561	135.817	54.6404	160.785	71.5498	1.16013	Y	up	Klla0A	417313
KLLA0A04708g	YGR163W	XP_003959045.1	XP_003675924.1	XP_001644037.1	NP_986620.1	SAKL0H23738g	XP_713239.1;XP_713292.1	XP_658557.1	NP_588251.1	122.421	87.9092	65.6824	48.6762	82.5898	57.1967	0.529801	N	up	No	No	104.825	95.7576	71.4398	60.1979	86.5788	78.6258	0.143339	N	up	96.3109	87.5406	62.4595	60.1979	78.3783	72.1723	0.121399	N	up	91.9289	95.9	64.0889	60.1979	75.8673	78.9164	-0.0534534	N	down	Klla0A	420317
KLLA0A04730g	YGR162W;YGL049C	XP_003958040.1;XP_003959044.1	XP_003673528.1;XP_003675923.1	XP_001644035.1;XP_001644843.1	NP_986622.2	SAKL0H23694g	XP_714443.1;XP_714492.1	XP_663664.1	NP_594602.1	60.6174	93.4539	175.543	280.858	220.549	330.019	-0.581512	N	down	No	No	117.601	131.426	264.897	272.599	321.062	355.715	-0.14889	N	down	112.408	120.156	242.877	272.599	304.674	326.525	-0.100767	N	down	150.374	131.655	345.336	272.599	408.773	357.03	0.193859	N	up	Klla0A	421863
KLLA0A04752g	YGL048C	XP_003958041.1	XP_003673529.1	XP_001644842.1	NP_986623.1	SAKL0H23672g	XP_714440.1;XP_714488.1	XP_664592.1	NP_595870.1	134.005	129.403	105.926	106.744	133.559	125.425	0.0906428	N	up	No	No	145.785	157.241	121.046	121.617	146.742	158.787	-0.11549	N	down	154.142	143.752	122.841	121.617	154.212	145.755	0.0806237	N	up	145.087	157.493	123.652	121.617	146.378	159.374	-0.123233	N	down	Klla0A	425610
KLLA0A04774g	YGL047W	XP_003958042.1	XP_003675922.1	XP_001644034.1	NP_986624.1	SAKL0H23650g	XP_718885.1;XP_718987.1	NA	NP_593269.1	34.1572	31.8079	9.16979	8.88279	11.5263	10.4384	0.142443	N	up	No	No	41.9835	44.6941	13.3201	12.9812	16.1367	16.9534	-0.0511934	N	down	42.3971	40.8601	12.6369	12.9812	15.86	15.5619	0.0309312	N	up	40.7948	44.7662	13.3359	12.9812	15.7901	17.0161	-0.100125	N	down	Klla0A	427263
KLLA0A04796g	YGL020C	XP_003958050.1	XP_003673122.1	XP_001644981.1	NP_985553.1	SAKL0H21670g	XP_719547.1;XP_719672.1	NA	NP_596798.1	138.509	206.643	51.1907	80.0791	64.7407	94.0973	-0.539017	N	down	No	No	193.276	243.708	69.8434	81.1811	84.6242	106.001	-0.3208	N	down	236.12	222.8	80.4387	81.1811	100.909	97.3011	0.0529405	N	up	187.019	244.092	69.0931	81.1811	81.7938	106.393	-0.379296	N	down	Klla0A	427861
KLLA0A04818g	YGL019W	XP_003958051.1	XP_003673121.1	XP_001644980.1	NP_986829.1	SAKL0H21692g	XP_719548.1;XP_719673.1	XP_658876.1;XP_661930.1	NP_594606.1;NP_596063.1	109.153	129.011	58.4829	70.8072	73.4212	83.1981	-0.180675	N	down	No	No	155.567	151.366	86.783	75.6782	105.2	98.8183	0.0890938	N	up	124.05	138.378	65.4689	75.6782	82.0774	90.708	-0.142775	N	down	167.122	151.597	94.531	75.6782	111.938	99.1836	0.17549	N	up	Klla0A	429275
KLLA0A04840g	YGL018C	XP_003958052.1	XP_003673120.1	XP_001644979.1	NP_986830.1	SAKL0H21714g	XP_719550.1;XP_719675.1	XP_659073.1	NP_594669.1	178.288	172.951	56.4555	57.8674	71.3878	68.0004	0.07056	N	up	No	No	191.611	237.831	63.2063	72.0291	76.6286	94.0968	-0.295671	N	down	255.856	217.421	80.6895	72.0291	101.24	86.3731	0.232447	N	up	191.529	238.178	64.1144	72.0291	75.8993	94.4445	-0.310798	N	down	Klla0A	430541
KLLA0A04862g	YGL017W	XP_003958053.1	XP_003673119.1	XP_001646323.1	NP_986831.1	SAKL0H21758g	XP_719556.1;XP_719681.1	XP_663854.1	NP_593608.2	65.1818	66.8091	56.5242	59.6363	71.0607	70.0725	0.0198769	N	up	No	No	54.507	66.0804	56.6341	63.6977	68.6904	83.2161	-0.280861	N	down	68.2542	60.4095	68.5257	63.6977	86.0329	76.3855	0.1744	N	up	51.647	66.1765	55.1638	63.6977	65.3072	83.5236	-0.349261	N	down	Klla0A	431710
KLLA0A04884g	YGL016W	XP_003958054.1	XP_003673118.1	XP_001646324.1	NP_986832.1	SAKL0H21802g	XP_719540.1;XP_719664.1	XP_681000.1	NP_593051.1	30.8478	41.4297	58.6461	80.9219	73.7725	95.0799	-0.366209	N	down	No	No	36.0407	40.2137	83.7981	86.6328	101.532	113.093	-0.153745	N	down	32.9213	36.7642	73.4511	86.6328	92.1667	103.811	-0.173013	N	down	43.4926	40.2792	103.421	86.6328	122.432	113.511	0.107209	N	up	Klla0A	433581
KLLA0A04906g	NA	NA	NA	NA	NP_986833.1	SAKL0H21824g	XP_719544.1;XP_719668.1	XP_662645.1;XP_663942.1	NP_588566.1;NP_593270.1;NP_595128.1	46.4513	3.88668	35.5483	3.13447	44.7677	3.68255	3.6012	Y	up	Yes	No	18.4515	4.32376	18.3029	4.01174	22.1889	5.2435	2.10493	Y	up	2.8976	3.95249	2.91247	4.01174	3.6569	4.81305	-0.370957	N	down	20.1157	4.32908	20.4344	4.01174	24.1857	5.26287	2.23028	Y	up	Klla0A	437523
KLLA0A04928g	YBL008W	XP_003959021.1	XP_003673294.1	XP_001646325.1	NP_986834.2	SAKL0H21846g	XP_719545.1;XP_719670.1	XP_658890.1	NP_596575.1	14.8927	17.5929	26.7099	32.9278	33.6067	38.6874	-0.203511	N	down	No	No	18.0014	18.0625	33.172	30.868	40.2162	40.3061	-0.00816738	N	down	17.6288	16.5128	31.3228	30.868	39.27	36.9981	0.0883898	N	up	18.0584	18.0906	34.1864	30.868	40.4763	40.4551	0.0022401	N	up	Klla0A	439349
KLLA0A04961g	YGL009C	XP_003958075.1	XP_003673117.1;XP_003673295.1	XP_001644978.1	NP_986835.2	SAKL0H21868g	XP_718655.1	XP_663490.1	NP_594576.1	1767.18	1208.63	3020.65	2212.88	3813.37	2600.08	0.552512	N	up	No	No	1191.32	768.728	2026.99	1204.88	2457.41	1573.76	0.642964	N	up	836.387	702.761	1364.65	1204.88	1712.92	1444.59	0.24589	N	up	704.174	769.865	1225.32	1204.88	1450.77	1579.57	-0.122512	N	down	Klla0A	442461
KLLA0A04983g	YBL007C	XP_003959020.1	XP_003673296.1	XP_001644977.1	NP_986836.2	SAKL0H21912g	XP_722384.1;XP_722523.1	XP_659066.1	NP_594213.1	35.4937	37.6829	99.6267	111.729	125.928	131.284	-0.0599136	N	down	No	No	40.1202	43.6449	112.465	112.603	136.296	146.988	-0.109465	N	down	43.9439	39.9012	118.019	112.603	148.144	134.925	0.133234	N	up	46.0598	43.7166	131.754	112.603	155.97	147.532	0.0784379	N	up	Klla0A	445032
KLLA0A05005g	YGL010W	XP_003956338.1	XP_003673116.1	XP_001645479.1	NP_986837.2	SAKL0H21934g	XP_722387.1;XP_722526.1	XP_659126.1	NP_594214.1	171.053	77.1107	41.3334	19.7743	52.4921	23.2398	1.17608	Y	up	No	No	154.15	121.099	45.0573	32.688	54.6056	42.6988	0.362591	N	up	137.71	110.707	38.7617	32.688	48.6429	39.1941	0.316529	N	up	158.384	121.279	47.3996	32.688	56.1011	42.8566	0.394211	N	up	Klla0A	449590
KLLA0A05027g	YGL011C	XP_003958074.1	XP_003673115.1	XP_001645478.1	NP_986577.1	SAKL0H21956g	XP_717661.1;XP_717755.1	XP_662473.1	NP_595374.1	322.736	191.938	131.951	84.8327	166.311	99.6893	0.738421	N	up	No	No	371.261	363.755	169.247	151.681	205.132	198.082	0.0509865	N	up	310.542	332.544	135.949	151.681	170.596	181.824	-0.0915386	N	down	358.947	364.31	166.444	151.681	197.05	198.814	-0.0121801	N	down	Klla0A	450398
KLLA0A05049g	YBL006C	XP_003959019.1	XP_003673297.1	XP_001645477.1	NP_986578.1	SAKL0H21978g	XP_714478.1;XP_714526.1	NA	NA	77.8639	97.22	16.4669	21.9072	20.7175	25.741	-0.313705	N	down	No	No	130.728	138.919	27.982	27.5512	33.9145	35.9785	-0.082628	N	down	139.59	127.001	28.1738	27.5512	35.344	33.0256	0.100305	N	up	122.266	139.138	26.6433	27.5512	31.5422	36.1115	-0.192269	N	down	Klla0A	451480
KLLA0A05071g	YGL012W	XP_003955240.1;XP_003958073.1	XP_003673299.1	XP_001645476.1	NP_986579.1	SAKL0H22000g	XP_717662.1;XP_717756.1	XP_660288.1;XP_662788.1	NP_594742.1	235.579	248.334	173.027	194.28	218.72	228.291	-0.0616845	N	down	No	No	199.908	234.441	195.981	211.665	237.561	276.369	-0.218739	N	down	273.091	214.328	255.831	211.665	321.215	253.687	0.340191	N	up	177.508	234.812	177.496	211.665	210.133	277.391	-0.400642	N	down	Klla0A	452333
KLLA0A05093g	YGR253C	XP_003955875.1	XP_003676078.1	XP_001645153.1	NP_985153.1	SAKL0H02068g	XP_711782.1;XP_711800.1	XP_663476.1	NP_594372.1	346.049	268.338	161.241	131.062	203.357	154.011	0.401021	N	up	No	No	350.04	354.342	178.294	165.368	216.166	216.001	0.000882521	N	up	343.432	323.936	165.396	165.368	207.573	198.272	0.0670057	N	up	352.502	354.871	181.81	165.368	215.232	216.799	-0.00905984	N	down	Klla0A	454423
KLLA0A05115g	YGR252W	XP_003955876.1	XP_003676817.1	XP_001645154.1	NP_985154.1	SAKL0H02101g	XP_711778.1;XP_711796.1	XP_661225.1	NP_594807.1	19.7222	27.4808	21.3964	29.7627	26.7188	34.9728	-0.389701	N	down	No	No	31.9631	30.1241	34.4102	29.6364	41.7231	38.6683	0.0936848	N	up	26.7146	27.5411	27.3521	29.6364	34.3034	35.4952	-0.0562786	N	down	30.6545	30.1779	33.3887	29.6364	39.5249	38.8113	0.0133548	N	up	Klla0A	455456
KLLA0A05137g	YHR171W	XP_003957516.1	XP_003676079.1	XP_001647084.1	NP_985155.1	SAKL0H02112g	XP_711780.1;XP_711798.1	XP_680697.1	NP_596084.1	68.6916	24.8739	78.1179	29.5542	98.785	34.7225	1.50843	Y	up	No	No	43.5148	35.366	56.0535	41.6492	67.9947	54.3858	0.313168	N	up	34.6718	32.3316	42.7799	41.6492	53.7123	49.9221	0.104913	N	up	37.085	35.4206	49.0971	41.6492	58.132	54.5868	0.0925805	N	up	Klla0A	457440
KLLA0A05159g	YHR170W	XP_003955877.1;XP_003957515.1	XP_003676080.1	XP_001645155.1	NP_985156.2	SAKL0H02134g	XP_711779.1;XP_711797.1	XP_659315.1	NP_593077.1	52.0375	102.301	51.5564	106.097	64.636	124.651	-0.947871	N	down	No	No	126.889	102.369	136.492	101.574	165.383	132.502	0.31739	N	up	68.1374	93.5923	69.7853	101.574	87.5035	121.63	-0.47757	N	down	171.502	102.557	187.706	101.574	222.239	132.992	0.736375	N	up	Klla0A	459573
KLLA0A05181g	YGR251W	XP_003955878.1	XP_003676818.1	XP_001647083.1	NP_985157.1	SAKL0H02156g	XP_721879.1;XP_722040.1	NA	NA	8.02918	20.3975	2.35254	6.15799	2.90837	7.23429	-1.32274	Y	down	No	No	41.9751	19.9207	13.6096	5.91912	16.4831	7.72443	1.09851	Y	up	10.6221	18.2122	3.41973	5.91912	4.28908	7.09055	-0.735719	N	down	74.1798	19.9547	24.9891	5.91912	29.5788	7.75299	1.91234	Y	up	Klla0A	461373
KLLA0A05203g	YHR169W	XP_003955879.1	XP_003676819.1	XP_001645156.1	NP_985158.1	SAKL0H02178g	XP_711718.1;XP_712192.1	XP_662507.1	NP_596794.1	10.8177	39.4572	9.02526	33.8725	11.2548	39.7918	-1.82413	Y	down	No	No	40.0071	35.0682	35.3325	28.5002	42.8188	37.1705	0.192845	N	up	20.181	32.0621	16.8707	28.5002	21.1518	34.1207	-0.697778	N	down	59.1442	35.1347	53.0911	28.5002	62.8472	37.308	0.735779	N	up	Klla0A	462167
KLLA0A05225g	YHR168W	XP_003957514.1	XP_003676081.1	XP_001647082.1	NP_985159.1	SAKL0H02200g	XP_711719.1;XP_712193.1	XP_658493.1	NP_594950.1	13.2873	16.6974	14.5971	18.9149	18.3447	22.2259	-0.27761	N	down	No	No	24.5553	17.8519	28.9967	19.151	35.1434	25.0138	0.497751	N	up	15.5248	16.3199	17.5575	19.151	22.0373	22.9607	-0.0547915	N	down	35.2375	17.878	42.6337	19.151	50.4707	25.1062	1.01479	Y	up	Klla0A	463760
KLLA0A05247g	YHR167W	XP_003957513.1	XP_003676082.1	XP_001647081.1	NP_983154.2	SAKL0H02222g	NA	NA	NA	33.7461	42.7729	15.9544	20.5778	20.0315	24.182	-0.272527	N	down	No	No	51.8282	47.9439	25.226	21.4568	30.5714	28.009	0.123962	N	up	44.4528	43.8313	20.7378	21.4568	26.0142	25.7104	0.0134508	N	up	55.0853	48.0219	27.6159	21.4568	32.6949	28.1125	0.211905	N	up	Klla0A	465702
KLLA0A05258g	YHR166C	XP_003957512.1	XP_003676083.1	XP_001647080.1	NP_983155.2	SAKL0H02244g	XP_716192.1;XP_716275.1	XP_681282.1	NP_593300.1	13.3952	16.909	13.6156	17.3515	17.101	20.3882	-0.254531	N	down	No	No	16.2794	18.4902	21.5336	22.3968	26.0987	29.2648	-0.152696	N	down	15.1125	16.9031	19.1685	22.3968	24.0533	26.8625	-0.149058	N	down	13.8946	18.5157	18.7894	22.3968	22.2443	29.3729	-0.386356	N	down	Klla0A	466776
KLLA0A05280g	NA	XP_003957511.1	NA	XP_001647079.1	NP_983156.2	SAKL0H02266g	XP_716196.1;XP_716279.1	XP_662127.1	NP_593861.1	7.66594	7.0914	36.8455	35.304	46.8928	41.4844	0.177659	N	up	No	No	7.81159	8.77832	42.6758	44.4099	51.7387	57.9475	-0.174823	N	down	7.76921	8.02558	40.7119	44.4099	51.0947	53.1924	-0.0647174	N	down	7.0319	8.79377	38.9499	44.4099	46.1107	58.1618	-0.343698	N	down	Klla0A	469130
KLLA0A05302g	NA	NA	NA	XP_001645157.1	NP_983157.1	SAKL0H02288g	NA	NA	NA	20.3398	19.0916	16.1016	15.2675	20.1193	17.9411	0.163695	N	up	No	No	35.9441	28.6964	27.3753	19.8131	33.1921	25.8722	0.352291	N	up	24.1598	26.2341	17.3599	19.8131	21.7802	23.7488	-0.123099	N	down	32.6519	28.7399	25.4534	19.8131	30.139	25.9678	0.218209	N	up	Klla0A	476757
KLLA0A05324g	YHR164C	XP_003957510.1	XP_003676086.1	XP_001647078.1	NP_984643.1	SAKL0H02310g	XP_712310.1;XP_712454.1	XP_661257.1	NP_596499.2	4.78426	6.2058	13.704	18.2732	17.1618	21.4675	-0.32452	N	down	No	No	6.53093	5.81547	21.2326	17.4272	25.7323	22.7377	0.166721	N	up	4.78025	5.31681	14.7514	17.4272	18.5276	20.8719	-0.185719	N	down	6.20912	5.82576	20.5757	17.4272	24.3514	22.8218	0.0756757	N	up	Klla0A	478337
KLLA0A05346g	YGR250C	XP_003955873.1;XP_003955873.1;XP_003955873.1;XP_003955873.1	XP_003676815.1	XP_001645158.1	NP_984644.1	SAKL0H02332g	NA	XP_660676.1;XP_664280.1;XP_680975.1	NP_001018242.1;NP_001018242.1;NP_001018242.1;NP_001018242.1;NP_593427.1;NP_593427.1;NP_593427.1;NP_593427.1;NP_595090.2;NP_596047.1;NP_596047.1;NP_596549.2;XP_001713104.1	40.5434	50.631	64.4908	82.6976	81.5062	97.1577	-0.253195	N	down	No	No	41.2284	45.0435	79.227	79.9034	96.0492	104.326	-0.122163	N	down	39.065	41.1793	71.9958	79.9034	90.391	95.764	-0.0844242	N	down	40.028	45.1152	78.2366	79.9034	92.6256	104.712	-0.177209	N	down	Klla0A	485886
KLLA0A05368g	YGR249W	XP_003955872.1	XP_003676814.1	XP_001645159.1;XP_001647077.1	NP_984645.1	SAKL0H02354g	XP_715888.1;XP_715939.1	XP_664602.1	NA	168.508	181.822	119.699	141.281	153.099	165.996	-0.116445	N	down	No	No	180.356	235.88	151.897	184.181	184.27	240.366	-0.387599	N	down	165.514	215.652	134.612	184.181	169.024	220.641	-0.385998	N	down	139.449	236.287	120.359	184.181	142.504	241.255	-0.761054	N	down	Klla0A	490032
KLLA0A05390g	YGR248W;YHR163W	XP_003957509.1	XP_003676087.1	XP_001647076.1	NP_984646.1	SAKL0H02376g	XP_711777.1;XP_711795.1	XP_657889.1	NP_587920.1	299.898	264.845	137.034	126.657	172.976	148.838	0.216937	N	up	No	No	278.055	327.217	131.799	143.026	159.761	186.835	-0.22479	N	down	363.127	299.135	166.814	143.026	209.403	171.5	0.289118	N	up	234.135	327.692	113.845	143.026	134.782	187.526	-0.474287	N	down	Klla0A	495847
KLLA0A05412g	YGR247W	XP_003955870.1	XP_003676812.1	XP_001647075.1	NP_984647.1	SAKL0H02398g	XP_711776.1;XP_711794.1	NA	NA	169.355	141.949	49.3158	42.7731	61.9902	50.2516	0.302447	N	up	No	No	141.833	135.799	53.1697	47.5804	64.4472	62.1419	0.0546532	N	up	128.873	124.146	46.2519	47.5804	58.0223	57.0415	0.0275151	N	up	119.217	136.002	45.7687	47.5804	54.1766	62.3716	-0.200327	N	down	Klla0A	496866
KLLA0A05434g	YGR246C	XP_003957508.1	XP_003676811.1	XP_001645805.1	NP_984648.1	SAKL0H02420g	XP_711715.1;XP_712189.1	XP_660720.1	NP_596265.2	38.4386	38.3684	45.8068	47.0278	57.5511	55.2612	0.0581935	N	up	No	No	48.7609	47.6978	56.8713	51.6465	68.9643	67.4451	0.0266415	N	up	39.2722	43.6054	43.9749	51.6465	55.1675	61.9096	-0.16456	N	down	49.9792	47.7713	60.2866	51.6465	71.3705	67.6944	0.0782354	N	up	Klla0A	497874
KLLA0A05456g	YGR245C	XP_003955869.1	XP_003676806.1	XP_001645804.1	NP_984649.1	SAKL0H02442g	XP_711714.1;XP_712188.1	XP_658448.1	NP_595163.1	19.6383	72.1723	31.1841	116.859	38.6754	137.299	-1.82846	Y	down	No	No	52.5884	45.0513	85.7006	68.7531	103.796	89.6888	0.210531	N	up	28.2369	41.189	43.9407	68.7531	55.1503	82.3296	-0.583524	N	down	95.8521	45.1345	159.799	68.7531	189.205	90.0206	1.06515	Y	up	Klla0A	500097
KLLA0A05478g	YGR244C	XP_003955868.1	XP_003676807.1	XP_001647073.1	NP_984650.1	SAKL0H02464g	XP_711783.1;XP_711801.1	XP_664604.1	NP_588466.1	566.504	287.092	531.668	292.3	676.721	343.519	0.978227	N	up	No	No	395.434	1003.28	350.645	819.914	425.034	1071.01	-1.33325	Y	down	614.897	917.186	525.181	819.914	658.982	983.1	-0.576872	N	down	225.215	1004.75	202.978	819.914	240.369	1074.97	-2.16039	Y	down	Klla0A	503729
KLLA0A05500g	YHR162W;YGR243W	XP_003955867.1;XP_003957507.1	XP_003676089.1;XP_003676808.1	XP_001645803.1	NP_984651.1	SAKL0H02486g	XP_716190.1;XP_716273.1	XP_682031.1	NP_592846.1	457.131	225.96	90.1205	47.5489	114.693	55.8751	1.03785	Y	up	No	No	713.076	802.743	144.599	148.351	175.197	193.522	-0.144538	N	down	410.086	733.927	77.8996	148.351	97.6665	177.643	-0.864415	N	down	613.503	804.241	127.177	148.351	150.545	194.238	-0.370906	N	down	Klla0A	505579
KLLA0A05511g	NA	NA	NA	NA	NA	NA	NA	NA	NA	15.227	21.8624	0.836718	1.31268	1.04199	1.5429	-0.572917	N	down	No	No	21.5167	12.1047	1.34168	0.742475	1.62213	0.968773	0.825836	N	up	16.3261	11.0671	0.796037	0.742475	NA	NA	NA	NA	NA	18.0864	12.1279	1.13366	0.742475	1.34146	0.972356	0.428663	N	up	Klla0A	506882
KLLA0A05522g	YGR241C;YHR161C	XP_003957506.1	XP_003676090.1;XP_003676809.1	XP_001643141.1	NP_984652.1	SAKL0H02530g	XP_712638.1;XP_712788.1	XP_662828.1	NP_596345.1	42.1296	39.5809	47.6944	46.3197	60.3221	54.4239	0.148707	N	up	No	No	46.2002	48.4938	54.9838	53.262	66.6604	69.5729	-0.0614951	N	down	50.2313	44.3319	57.4401	53.262	72.0917	63.8623	0.177821	N	up	39.9868	48.5633	48.5216	53.262	57.4245	69.83	-0.278948	N	down	Klla0A	507778
KLLA0A05544g	YGR240C	XP_003955865.1	XP_003676889.1	XP_001647072.1	NP_984653.1	SAKL0H02552g	XP_720865.1;XP_721378.1;XP_721876.1;XP_722036.1	XP_660827.1	NP_595946.1	1329.18	1753.54	2713.65	3839.33	3456.53	4511.03	-0.384121	N	down	No	No	610.386	1049.34	1337.31	2120.92	1623.06	2772.02	-0.772468	N	down	1387.92	959.251	2914.61	2120.92	3660.02	2544.46	0.524611	N	up	568.666	1050.7	1273.02	2120.92	1507.48	2782.26	-0.883877	N	down	Klla0A	510371
KLLA0A05566g	YJL133C-A	XP_003957930.1	XP_003678275.1	NA	NA	SAKL0C06490g	NA	NA	NA	1301.27	500.389	86.0605	35.8294	109.386	42.1005	1.37783	Y	up	No	No	1693.63	1291.59	109.106	76.3715	132.377	99.7813	0.405581	N	up	1040.57	1180.73	63.0142	76.3715	79.0749	91.5908	-0.208387	N	down	414.806	1293.38	27.8568	76.3715	32.9899	100.15	-1.59502	Y	down	Klla0A	514368
KLLA0A05621g	YKR054C	XP_003958237.1	XP_003675263.1	NA	NP_983660.1	SAKL0C06446g	XP_723061.1;XP_723208.1	XP_657722.1	XP_001713108.1	5.28204	4.24249	40.9558	33.5258	51.4856	39.3913	0.38591	N	up	No	No	4.32002	4.00211	40.0085	34.3834	48.485	44.8684	0.106405	N	up	3.76633	3.65892	33.6217	34.3834	42.1859	41.1865	0.0277914	N	up	4.00557	4.00912	37.8039	34.3834	44.737	45.0343	-0.0196202	N	down	Klla0A	516514
KLLA0A05643g	YKR055W	XP_003958236.1	XP_003675264.1	XP_001645261.1	NP_983659.1	SAKL0C06424g	XP_718153.1;XP_718422.1	XP_660291.1	NP_001018257.1	37.2082	44.3025	12.0447	14.5595	14.9468	17.1078	-0.197107	N	down	No	No	53.2264	34.3781	20.6714	12.013	25.0519	15.6886	0.682743	N	up	27.9341	31.4285	10.7921	12.013	13.5411	14.4009	-0.0844721	N	down	55.2536	34.4307	22.3602	12.013	26.4738	15.7466	0.755721	N	up	Klla0A	528976
KLLA0A05665g	YKR056W	XP_003958235.1	XP_003675265.1	XP_001646363.1	NP_983658.1	SAKL0C06402g	XP_718150.1;XP_718419.1	XP_657745.1	NP_593067.1	17.3304	48.5378	18.5332	53.2976	23.1591	62.6158	-1.43593	Y	down	No	Yes	38.1336	34.2926	46.4557	38.6224	56.2517	50.3608	0.158551	N	up	21.8553	31.3535	25.5036	38.6224	31.9655	46.229	-0.5383	N	down	64.1867	34.3597	79.7194	38.6224	94.357	50.5472	0.887229	N	up	Klla0A	529964
KLLA0A05687g	NA	NA	NA	NA	NA	NA	NA	NA	NA	72.7129	0.331955	15.7479	0.123917	19.7017	0.145374	7.02233	Y	up	Yes	No	95.3423	0.750754	25.1206	0.145806	30.4343	0.191039	7.40022	Y	up	0.161734	0.686185	0.066495	0.145806	NA	NA	NA	NA	NA	208.626	0.751205	54.7536	0.145806	64.817	0.191743	8.48873	Y	up	Klla0A	531875
KLLA0A05700g	YKR057W;YJL136C	XP_003957929.1	XP_003675266.1;XP_003678277.1	XP_001645260.1;XP_001646364.1	NP_983657.1	SAKL0C06380g	NA	XP_661427.1	NP_595852.1	2205.68	2788.96	1248.6	1606.92	1579.12	1888.11	-0.257809	N	down	No	No	2049.54	2791.4	1330.97	1698.05	1613.41	2217.14	-0.45867	N	down	2415.69	2551.92	1532.47	1698.05	1922.39	2035.17	-0.0822377	N	down	1973.86	2795.8	1336.12	1698.05	1581.75	2225.34	-0.492505	N	down	Klla0A	532965
KLLA0A05709g	YJL137C;YKR058W	XP_003958234.1	XP_003675267.1	XP_001646365.1	NP_983656.1	SAKL0C06358g	XP_716095.1;XP_718148.1;XP_718417.1	XP_661686.1	NP_596296.1;NP_596297.1	38.0819	8.57849	26.4213	6.21758	33.4888	7.30751	2.1967	Y	up	Yes	No	36.1241	26.5579	31.1655	21.3399	37.7794	27.8666	0.437445	N	up	29.1264	24.2792	24.2801	21.3399	30.464	25.5795	0.25391	N	up	33.9125	26.5987	30.0977	21.3399	35.6252	27.9696	0.349883	N	up	Klla0A	534438
KLLA0A05731g	YKR059W;YJL138C	XP_003958233.1	XP_003675268.1	XP_001645259.1	NP_983655.1	SAKL0C06336g	XP_718147.1;XP_718416.1;XP_718509.1;XP_718592.1	XP_660536.1;XP_681285.1	NP_592863.1;NP_594854.1	2044.84	1901.98	1729.71	1729.35	2184.72	2032.04	0.104525	N	up	No	No	2018.95	2547.46	1596.31	1859.03	1934.82	2427.27	-0.327151	N	down	2293.08	2328.92	1743.44	1859.03	2187.64	2228.06	-0.0264234	N	down	2251.49	2551.49	1819.84	1859.03	2154.79	2436.24	-0.177105	N	down	Klla0A	536243
KLLA0A05753g	YKR060W	XP_003958232.1	XP_003675269.1	XP_001645258.1	NP_983654.1	SAKL0C06314g	XP_710591.1;XP_710605.1	XP_664302.1	NP_593953.1	27.2403	78.6734	13.4108	39.0992	16.6302	45.933	-1.4674	Y	down	No	No	87.5415	65.4263	42.9404	29.4627	52.0041	38.4393	0.43686	N	up	51.1466	59.816	23.9524	29.4627	30.0467	35.2851	-0.240199	N	down	126.446	65.5414	63.3204	29.4627	74.9666	38.5815	0.945429	N	up	Klla0A	537889
KLLA0A05775g	YJL139C;YKR061W	XP_003957928.1;XP_003958231.1	XP_003675270.1	XP_001645257.1;XP_001646366.1	NP_983653.1;XP_002999468.1	SAKL0C06292g	XP_710267.1;XP_710275.1;XP_712888.1;XP_712920.1;XP_721621.1;XP_721740.1	XP_660356.1;XP_681388.1	NP_588253.1;NP_595123.2;NP_595938.1;NP_596168.1	138.362	148.357	93.9415	103.626	118.658	121.757	-0.0370447	N	down	No	No	112.239	134.996	102.1	113.353	123.729	148.038	-0.256355	N	down	113.411	123.413	99.1522	113.353	124.389	135.887	-0.126368	N	down	125.169	135.2	116.32	113.353	137.694	148.585	-0.10871	N	down	Klla0A	538934
KLLA0A05797g	YJL140W	XP_003957927.1	XP_003675271.1	XP_001645256.1	NP_983652.1	SAKL0C06270g	XP_710583.1;XP_710584.1;XP_710596.1;XP_710597.1	NA	NP_595415.1	102.288	123.344	34.3432	43.1608	43.1732	50.7104	-0.232513	N	down	No	No	182.537	164.572	61.9499	51.647	75.0711	67.4505	0.159513	N	up	149.31	150.451	48.2239	51.647	60.4968	61.9144	-0.0310242	N	down	177.642	164.822	61.7737	51.647	73.1319	67.6998	0.114261	N	up	Klla0A	540318
KLLA0A05819g	YJL141C	XP_003957926.1	XP_003678278.1	XP_001645255.1;XP_001646367.1	NP_983651.1	SAKL0C06248g	XP_710585.1;XP_710598.1	XP_664708.1	NP_593830.1	31.5996	31.5085	41.8486	43.0691	52.9057	50.611	0.0642615	N	up	No	No	26.7594	35.9517	40.7462	50.5144	49.4176	65.9905	-0.422596	N	down	44.3646	32.8662	64.8903	50.5144	81.4831	60.5738	0.43053	N	up	23.7643	36.0027	36.7957	50.5144	43.5612	66.2343	-0.59785	N	down	Klla0A	541545
KLLA0A05841g	YJL143W	XP_003957925.1	XP_003678279.1	XP_001646368.1	NP_983650.1	SAKL0C06226g	XP_710588.1;XP_710601.1	XP_659496.1	NP_593342.1	888.272	841.637	173.266	180.783	220.107	212.416	0.0514916	N	up	No	No	1094.85	1116.3	250.679	233.449	303.75	304.724	-0.00447765	N	down	992.967	1020.55	216.419	233.449	271.579	279.716	-0.0432492	N	down	1310.86	1118.14	303.58	233.449	359.418	305.85	0.232001	N	up	Klla0A	543975
KLLA0A05852g	NA	NA	NA	NA	NA	NA	NA	NA	NA	77.9509	81.4346	4.96135	5.72188	6.32661	6.72205	-0.0831632	N	down	No	No	142.726	159.136	9.5071	10.1754	11.5283	13.3025	-0.194869	N	down	112.936	145.465	7.38377	10.1754	9.27053	12.2104	-0.377243	N	down	114.257	159.305	7.9131	10.1754	9.36553	13.3516	-0.483933	N	down	Klla0A	544850
KLLA0A05863g	YGR286C	NA	XP_003675795.1	NA	NA	SAKL0C06182g	XP_718258.1;XP_718353.1	XP_664247.1	NP_587728.1	14.5058	31.4151	9.96068	22.217	12.5638	26.1044	-1.05439	Y	down	No	No	15.5425	21.7637	12.0061	15.1336	14.5442	19.7743	-0.413284	N	down	30.8766	19.8955	22.3726	15.1336	28.0816	18.1511	0.641261	N	up	14.5888	21.7933	11.7638	15.1336	13.9261	19.8473	-0.494015	N	down	Klla0A	545949
KLLA0A05885g	YJL145W	XP_003957923.1	XP_003678281.1	XP_001645254.1	NP_983649.1	SAKL0C06094g	XP_723391.1;XP_723579.1	XP_681502.1	NP_594480.1	123.288	123.527	60.506	62.2011	76.3509	73.0877	0.0631629	N	up	No	No	118.711	111.666	70.3937	60.9907	85.3417	79.6455	0.0974236	N	up	117.418	102.085	65.5192	60.9907	82.2232	73.1087	0.170156	N	up	128.196	111.84	77.0495	60.9907	91.2255	79.9399	0.192156	N	up	Klla0A	547338
KLLA0A05907g	YJL146W	XP_003957922.1	XP_003678282.1	XP_001646369.1	NP_983648.1	SAKL0C06072g	NA	NA	NA	107.543	65.2843	58.8045	37.2449	74.6159	43.7625	0.770162	N	up	No	No	70.6088	79.6978	49.3795	50.845	59.8599	66.4314	-0.146387	N	down	86.1719	72.8572	56.2014	50.845	70.5527	60.9784	0.214692	N	up	66.758	79.8088	47.2422	50.845	55.931	66.6769	-0.2456	N	down	Klla0A	548720
KLLA0A05929g	YJL147C	XP_003957921.1	XP_003678283.1	XP_001646370.1	NP_983647.2	SAKL0C06050g	NA	NA	NA	65.0534	56.2821	37.2377	33.5725	47.0158	39.4539	0.253336	N	up	No	No	48.6082	52.9837	34.9867	35.2456	42.4021	46.0407	-0.111333	N	down	52.8442	48.4366	36.0535	35.2456	45.2282	42.2617	0.103647	N	up	44.2231	53.0602	32.6684	35.2456	38.6824	46.2108	-0.247725	N	down	Klla0A	550666
KLLA0A05951g	YKR062W	XP_003958228.1	XP_003675272.1	XP_001645253.1	NP_983646.1	SAKL0C06028g	XP_723375.1;XP_723565.1	XP_663102.1	NP_587879.1	61.7253	108.677	33.7308	61.3111	42.3211	72.0378	-0.768081	N	down	No	No	82.9752	87.5082	44.7931	43.3813	54.294	56.6216	-0.0663727	N	down	78.3093	80.0032	40.1685	43.3813	50.3783	51.975	-0.0477265	N	down	88.5551	87.6566	48.9183	43.3813	57.9077	56.8309	0.0209566	N	up	Klla0A	552438
KLLA0A05973g	YJL148W	XP_003958227.1	XP_003675273.1	XP_001646371.1	NP_983645.1	SAKL0C06006g	XP_723390.1;XP_723578.1	NA	NA	78.6377	163.102	25.6943	54.4004	31.8341	63.9182	-1.00662	Y	down	No	No	229.586	187.743	74.1252	56.0349	89.7798	73.1031	0.296139	N	up	112.301	171.645	34.7844	56.0349	43.6142	67.1046	-0.625362	N	down	315.158	188.078	104.438	56.0349	123.634	73.3735	0.744755	N	up	Klla0A	553403
KLLA0A06017g	YKR063C	XP_003958226.1	XP_003675274.1	XP_001646372.1	NP_983644.1	SAKL0C05940g	XP_714152.1;XP_714290.1	NA	NP_596810.1	6.25711	15.1465	5.22083	12.4154	6.49165	14.5869	-1.17113	Y	down	No	No	19.1764	13.6732	18.0703	11.7622	21.8856	15.3526	0.522039	N	up	9.7801	12.5006	8.94069	11.7622	11.237	14.0927	-0.338704	N	down	22.6933	13.6967	21.7921	11.7622	25.8036	15.4094	0.735466	N	up	Klla0A	555280
KLLA0A06039g	YKR064W	XP_003958225.1	XP_003675275.1	XP_001646373.1	NP_983643.2	SAKL0C05918g	XP_710388.1;XP_710396.1;XP_710938.1;XP_712030.1;XP_712051.1;XP_714604.1;XP_714734.1;XP_715866.1;XP_715916.1;XP_716452.1;XP_716481.1;XP_716535.1;XP_716622.1;XP_718128.1;XP_718397.1;XP_719345.1;XP_720596.1;XP_720724.1;XP_722720.1;XP_722865.1;XP_723055.1;XP_723202.1;XP_723264.1;XP_723272.1;XP_723453.1	XP_657806.1;XP_658137.1;XP_658172.1;XP_658342.1;XP_658457.1;XP_658481.1;XP_658506.1;XP_658633.1;XP_659340.1;XP_659424.1;XP_659433.1;XP_659620.1;XP_659928.1;XP_659958.1;XP_660007.1;XP_660219.1;XP_660389.1;XP_660654.1;XP_660679.1;XP_660712.1;XP_660989.1;XP_661372.1;XP_661504.1;XP_661727.1;XP_662210.1;XP_663412.1;XP_663453.1;XP_663474.1;XP_663528.1;XP_663996.1;XP_664392.1;XP_664450.1;XP_680478.1;XP_…	NP_001018765.1;NP_593001.1;NP_593160.2;NP_593664.2;NP_596766.1	38.8882	22.057	41.1639	23.9491	51.9485	28.1435	0.884496	N	up	No	No	31.348	24.6789	44.721	32.8486	54.168	42.8853	0.344997	N	up	20.499	22.5621	28.2546	32.8486	35.4112	39.3657	-0.151204	N	down	29.4831	24.7198	43.3086	32.8486	51.2582	43.0438	0.248143	N	up	Klla0A	557368
KLLA0A06061g	YJL149W	XP_003957920.1	XP_003678284.1	XP_001646870.1	NP_983642.1	SAKL0C05896g	XP_711092.1;XP_711109.1;XP_713561.1;XP_713596.1;XP_716654.1;XP_716714.1	XP_659964.1	NP_595658.1	42.9828	28.0592	36.2726	24.2444	45.5728	28.4863	0.677213	N	up	No	No	23.8792	29.825	27.172	31.1907	32.9212	40.7585	-0.291218	N	down	25.0083	27.2647	27.355	31.1907	34.308	37.4127	-0.115105	N	down	21.1386	29.8646	25.0033	31.1907	29.5971	40.909	-0.454899	N	down	Klla0A	559396
KLLA0A06083g	YKR065C	XP_003958224.1	XP_003675276.1	XP_001646868.1	NP_984424.1	SAKL0C05808g	XP_719939.1;XP_720069.1	XP_657975.1	NP_593381.2	454.94	427.594	129.243	129.706	162.142	152.399	0.0891678	N	up	No	No	439.315	500.449	152.281	157.498	184.614	205.717	-0.156211	N	down	449.978	457.502	147.309	157.498	184.751	188.832	-0.0302804	N	down	313.744	501.177	109.641	157.498	129.803	206.477	-0.668079	N	down	Klla0A	562140
KLLA0A06105g	YCR030C	XP_003957896.1	XP_003678311.1	XP_001646397.1;XP_001646845.1	NP_984714.1	SAKL0C04620g	XP_713352.1;XP_713399.1	XP_658301.1	NP_596005.1	82.5844	80.3122	44.9154	45.3025	56.8539	53.2318	0.0954774	N	up	No	No	58.659	93.872	34.3156	49.6103	41.6142	64.8244	-0.641904	N	down	92.1839	85.8145	50.9901	49.6103	63.98	59.5032	0.110699	N	up	55.4317	94.0012	33.149	49.6103	39.2512	65.0639	-0.719846	N	down	Klla0A	563147
KLLA0A06127g	NA	NA	NA	NA	NA	NA	NA	NA	NA	250.079	184.173	55.0387	42.9129	70.1979	50.4156	0.478076	N	up	No	No	134.599	188.424	35.5575	46.5202	43.0807	60.8036	-0.483171	N	down	200.17	172.246	51.3444	46.5202	64.4149	55.8121	0.214709	N	up	126.756	188.66	34.7808	46.5202	41.1913	61.0282	-0.556461	N	down	Klla0A	564088
KLLA0A06149g	YCR028C-A	XP_003958197.1	XP_003675299.1	XP_001646847.1	NP_984716.2	SAKL0C04664g	XP_718504.1;XP_718587.1	XP_681011.1	NP_594383.1	991.666	782.7	174.668	147.748	220.964	173.603	0.348128	N	up	No	No	952.753	1063.73	169.588	175.364	205.532	228.981	-0.15544	N	down	922.239	972.466	159.498	175.364	200.153	210.188	-0.0705778	N	down	927.371	1065.38	170.816	175.364	202.248	229.827	-0.18416	N	down	Klla0A	565427
KLLA0A06171g	YJL184W	XP_003957898.1	XP_003678309.1	XP_001646396.1	NP_984717.1	SAKL0C04686g	XP_713748.1;XP_713782.1	NA	NA	193.766	191.651	22.8643	23.7997	28.8467	27.9696	0.0449514	N	up	No	No	241.111	170.816	32.707	21.5556	39.6476	28.1525	0.495605	N	up	162.018	156.158	21.4835	21.5556	26.9442	25.8418	0.0657986	N	up	232.098	171.066	32.3393	21.5556	38.2733	28.2565	0.440948	N	up	Klla0A	566176
KLLA0A06193g	YCR028C	XP_003958198.1	XP_003675298.1	XP_001646848.1	NP_984718.2	SAKL0C04708g;SAKL0E15290g	XP_719099.1;XP_719216.1	XP_660267.1;XP_660836.1	NP_596430.1	76.0048	70.7735	54.756	55.693	69.4442	65.4402	0.0861745	N	up	No	No	99.9758	116.254	89.7817	96.1691	108.798	125.618	-0.203465	N	down	122.647	106.278	104.865	96.1691	131.585	115.308	0.192518	N	up	95.8104	116.426	87.7101	96.1691	103.834	126.083	-0.277265	N	down	Klla0A	566780
KLLA0A06215g	YJL183W	XP_003957899.1	XP_003678308.1	XP_001646849.1	NP_984719.1	SAKL0C04730g	XP_721155.1;XP_721427.1	XP_659573.1	NP_592824.1;NP_592826.1;NP_594832.1;NP_595579.2;NP_596837.1	62.4011	69.6797	47.5764	56.4354	59.7979	66.3071	-0.149272	N	down	No	No	113.698	119.832	95.4358	92.7564	115.658	121.082	-0.0666423	N	down	92.2438	109.554	73.9118	92.7564	92.7105	111.145	-0.262513	N	down	106.611	120.03	91.0716	92.7564	107.814	121.53	-0.17484	N	down	Klla0A	568689
KLLA0A06237g	YJR030C	XP_003958199.1	XP_003675297.1	XP_001646395.1	NP_984720.2	SAKL0C04752g	NA	NA	NA	43.1008	48.525	67.7634	77.8249	83.9421	91.4351	-0.123716	N	down	No	No	43.4648	41.0194	77.0788	66.9357	93.3742	87.3863	0.0997091	N	up	43.645	37.5006	74.267	66.9357	93.2365	80.2146	0.215248	N	up	32.8733	41.0851	59.2553	66.9357	70.16	87.7094	-0.323023	N	down	Klla0A	570630
KLLA0A06259g	YJL180C	XP_003957900.1	XP_003678307.1	XP_001646394.1	NP_984721.1	SAKL0C04774g	XP_713746.1;XP_713780.1	XP_682331.1	NP_593355.2	94.3671	122.929	52.6323	71.1882	66.4251	83.6512	-0.332407	N	down	No	No	165.125	164.451	104.819	96.4954	127.083	125.982	0.00952178	N	up	131.778	150.343	80.0075	96.4954	100.349	115.643	-0.204613	N	down	182.622	164.712	118.723	96.4954	140.581	126.448	0.152522	N	up	Klla0A	573195
KLLA0A06281g	YJL179W	XP_003957901.1	XP_003678306.1	XP_001646850.1	NP_984722.1	SAKL0C04796g	XP_713747.1;XP_713781.1	XP_661277.1	NP_595718.1	234.171	314.592	29.6457	41.4529	37.2207	48.7135	-0.38878	N	down	No	No	284.472	301.121	38.8383	37.0746	47.0874	48.4328	-0.0396586	N	down	318.873	275.274	41.1403	37.0746	51.6116	44.4573	0.221348	N	up	304.213	301.535	41.4545	37.0746	49.0714	48.6118	0.0211455	N	up	Klla0A	574472
KLLA0A06303g	YJL178C	XP_003957902.1	XP_003678305.1	XP_001646851.1	NP_984723.2	SAKL0C04818g	XP_717046.1;XP_717125.1	NA	NA	163.795	116.777	78.9879	59.7645	99.9294	70.228	0.509174	N	up	No	No	145.569	159.934	77.0893	78.6858	93.4676	102.77	-0.13855	N	down	144.265	146.211	73.0207	78.6858	91.6212	94.3353	-0.040252	N	down	131.785	160.175	72.2771	78.6858	85.5734	103.15	-0.266578	N	down	Klla0A	575020
KLLA0A06336g	YJL177W;YKL180W	XP_003957903.1	XP_003675296.1;XP_003678304.1	XP_001646852.1	NP_984724.2	SAKL0C04840g	XP_712884.1;XP_712916.1	XP_658380.1	NP_587841.1;NP_595711.1	2994.87	2939.3	1827.11	1875.06	2313.91	2203.48	0.0705601	N	up	No	No	3381.06	4124.04	2400.98	2698.78	2910.03	3523.63	-0.276035	N	down	3551.99	3770.24	2422.35	2698.78	3039.15	3234.44	-0.0898521	N	down	3372.75	4130.59	2442.13	2698.78	2891.01	3536.66	-0.290832	N	down	Klla0A	576887
KLLA0A06402g	YKL179C	XP_003958200.1	XP_003675295.1	XP_001646853.1	NP_984725.1	SAKL0C04862g	XP_720965.1;XP_721087.1	XP_658366.1	NP_587840.1	36.5816	46.9629	52.0869	66.8303	65.2142	78.5297	-0.268653	N	down	No	No	45.0605	45.912	62.9789	58.9417	76.372	76.9534	-0.0183904	N	down	47.3351	41.9734	63.0275	58.9417	79.1221	70.6378	0.162023	N	up	45.1636	45.9852	64.1657	58.9417	75.9662	77.2379	-0.0250093	N	down	Klla0A	578090
KLLA0A06424g	YJL176C	XP_003957904.1	XP_003678303.1	XP_001646393.1	NP_984726.2	SAKL0C04884g	XP_712883.1;XP_712915.1	NA	NP_594257.1	22.5591	28.8779	52.0714	67.8879	65.3103	79.7676	-0.289	N	down	No	No	33.6443	32.8497	70.6391	63.2916	85.6299	82.6211	0.0474876	N	up	34.4942	30.032	68.9494	63.2916	86.5165	75.8406	0.188062	N	up	32.6508	32.9036	69.413	63.2916	82.1795	82.9266	-0.0155581	N	down	Klla0A	580397
KLLA0A06446g	NA	NA	NA	NA	NA	NA	NA	NA	NA	62.382	128.687	29.5784	62.4063	37.314	73.3411	-0.974827	N	down	No	No	41.8909	56.4163	23.5166	29.1308	28.5226	38.0797	-0.417051	N	down	112.196	51.5725	60.2024	29.1308	75.6328	34.9536	1.12148	Y	up	42.1508	56.4879	24.5284	29.1308	29.0359	38.2203	-0.381076	N	down	Klla0A	583793
KLLA0A06468g	YDL049C;YJL174W	XP_003957905.1	XP_003673186.1;XP_003678302.1	XP_001646392.1	NP_984727.2;NP_986137.2	SAKL0C04906g;SAKL0H03850g	XP_722931.1;XP_723077.1	XP_663422.1	NA	71.0917	218.101	36.1678	119.359	45.1305	140.248	-1.6363	Y	down	No	No	173.927	211.017	91.7569	102.888	111.162	134.243	-0.272139	N	down	127.557	192.922	65.4498	102.888	82.1746	123.227	-0.588245	N	down	193.97	211.388	105.72	102.888	125.163	134.739	-0.110444	N	down	Klla0A	586957
KLLA0A06490g	YJL173C	XP_003957906.1	XP_003678301.1	XP_001646854.1	NP_984728.1	SAKL0C04928g	NA	NA	NA	223.11	309.11	34.8465	49.9148	43.5232	58.6458	-0.431132	N	down	No	No	357.73	234.773	48.7538	29.4469	59.0949	38.4331	0.613051	N	up	205.688	214.636	27.3217	29.4469	34.3052	35.2791	-0.0472929	N	down	318.904	235.163	44.556	29.4469	52.7444	38.5752	0.442702	N	up	Klla0A	588024
KLLA0A06512g	YJL172W	XP_003957907.1	XP_003678300.1	XP_001646258.1;XP_001646673.1	NP_984729.1	SAKL0C00308g;SAKL0C04950g	XP_720209.1;XP_720439.1	XP_662414.1;XP_680972.1	NP_594033.1	360.025	257.582	412.082	314.241	520.14	369.261	0.494276	N	up	No	No	220.942	286.889	284.035	339.088	344.287	442.937	-0.363068	N	down	325.226	262.268	401.64	339.088	504.208	406.58	0.31087	N	up	182.304	287.303	239.749	339.088	283.917	444.574	-0.646006	N	down	Klla0A	589213
KLLA0A06534g	YKL178C	XP_003958201.1	XP_003675294.1	XP_001646391.1	NP_984730.1	SAKL0C04972g	XP_718511.1;XP_718594.1	XP_681012.1	NP_593942.1	42.4974	32.6446	27.527	22.1652	34.9555	26.0461	0.425395	N	up	No	No	11.8722	13.7379	10.6156	11.3308	12.8742	14.8098	-0.199094	N	down	16.0723	12.5582	13.9192	11.3308	17.4828	13.5941	0.377146	N	up	16.1167	13.7548	15.0861	11.3308	17.8655	14.8645	0.292584	N	up	Klla0A	591225
KLLA0A06556g	YJL171C	XP_003958202.1;XP_003958204.1	XP_003675293.1	XP_001646390.1;XP_001646855.1	NP_984731.2	SAKL0C04994g;SAKL0C05016g	XP_710457.1;XP_710476.1	NA	NP_595823.1	237.774	246.783	172.285	191.518	217.388	225.037	-0.0498361	N	down	No	No	170.123	184.146	138.796	139.675	168.199	182.526	-0.114558	N	down	169.22	168.338	132.344	139.675	166.197	167.543	-0.0100743	N	down	172.911	184.393	144.414	139.675	171.002	183.201	-0.0961416	N	down	Klla0A	593187
KLLA0A06578g	YJL170C	XP_003957908.1	XP_003678299.1	XP_001646389.1	NP_984732.1	SAKL0C05038g	NA	NA	NA	11.2363	5.5962	4.15198	2.18636	5.22783	2.56944	1.02394	Y	up	No	No	11.7878	4.74002	4.78534	1.7838	5.80094	2.3318	1.34481	Y	up	3.75721	4.33295	1.66427	1.7838	2.08966	2.14037	-0.00121178	N	down	10.8417	4.74559	4.6419	1.7838	5.49025	2.34041	1.25503	Y	up	Klla0A	594872
KLLA0A06600g	YJL168C	XP_003957909.1	XP_003678298.1	XP_001646388.1	NP_984733.2	Sklu_YGOB_Anc_1.170b	XP_714361.1;XP_714401.1	XP_682094.1	NP_594980.1	28.9183	43.366	42.5326	64.7991	53.3551	76.1383	-0.513524	N	down	No	No	31.5081	35.5728	48.5246	50.2967	58.8164	65.6831	-0.15832	N	down	33.7663	32.5205	49.57	50.2967	62.159	60.2921	0.0464605	N	up	40.4131	35.6269	62.9822	50.2967	74.5369	65.9258	0.17768	N	up	Klla0A	596010
KLLA0A06622g	YKL176C	XP_003958205.1	XP_003675292.1	XP_001646856.1	NP_984734.2	Sklu_YGOB_Anc_1.171	XP_720994.1;XP_720994.1;XP_720994.1;XP_720994.1;XP_721115.1;XP_721115.1;XP_721115.1;XP_721115.1	NA	NA	10.5068	14.9922	15.9706	23.511	19.9544	27.6285	-0.470774	N	down	No	No	11.5844	15.9671	18.0819	22.7921	21.9247	29.7467	-0.458179	N	down	12.6662	14.5977	19.1695	22.7921	24.0292	27.3056	-0.187095	N	down	12.8689	15.9941	20.3727	22.7921	24.1192	29.8567	-0.317203	N	down	Klla0A	598561
KLLA0A06644g	YKL175W	XP_003958206.1	XP_003675291.1	XP_001646387.1	NP_984735.2	SAKL0C05104g	XP_722439.1;XP_722578.1	XP_663726.1	NP_588452.2	171.991	155.797	136.939	132.621	174.262	155.839	0.161443	N	up	No	No	121.48	151.913	120.28	138.083	145.815	180.393	-0.306348	N	down	178.808	138.875	168.803	138.083	211.891	165.586	0.357081	N	up	150.116	152.129	151.563	138.083	179.441	181.06	-0.0105	N	down	Klla0A	601527
KLLA0A06666g	YKL174C	XP_003958207.1	XP_003675290.1	XP_001646857.1	NP_984736.1	SAKL0C05126g	XP_710590.1;XP_710602.1	XP_658665.1	NA	40.7686	29.2025	33.8475	25.4721	42.8086	29.9275	0.516821	N	up	No	No	60.6825	38.6918	70.1951	41.1032	85.0604	53.63	0.659621	N	up	25.6048	35.3742	28.2318	41.1032	35.4126	49.2293	-0.48115	N	down	79.8343	38.761	94.1868	41.1032	111.497	53.8284	1.04101	Y	up	Klla0A	603169
KLLA0A06688g	YKL173W	XP_003958208.1	XP_003675289.1	XP_001646386.1	NP_984737.1	NA	XP_710582.1;XP_710595.1	XP_659012.1	NP_596689.2	6.6226	14.4159	12.0383	26.3611	15.0516	30.976	-1.04301	Y	down	No	No	11.4559	13.1635	23.4022	24.6826	28.3602	32.2106	-0.189053	N	down	11.8137	12.0346	23.0347	24.6826	28.9014	29.5674	-0.0406941	N	down	14.7125	13.1862	30.7569	24.6826	36.414	32.3298	0.160539	N	up	Klla0A	605011
KLLA0A06710g	YKL172W	XP_003958209.1	XP_003678297.1	XP_001646385.1	NP_984738.2	SAKL0C05170g	XP_712886.1;XP_712918.1	XP_657678.1	NP_593575.1	38.1612	99.7352	41.5457	109.234	51.806	128.344	-1.30947	Y	down	No	No	114.463	108.537	98.841	86.647	119.779	113.019	0.0799819	N	up	67.7558	99.2321	56.4664	86.647	70.7913	103.746	-0.554099	N	down	185.404	108.738	163.592	86.647	193.676	113.438	0.766115	N	up	Klla0A	608103
KLLA0A06732g	YJL167W	XP_003958211.1	XP_003675288.1	XP_001646858.1	NP_984739.1	SAKL0C05192g	XP_712885.1;XP_712917.1	XP_681281.1	NP_593299.1	309.506	504.318	210.394	366.299	265.686	430.423	-0.695978	N	down	No	No	352.607	411.832	240.063	256.881	290.941	335.637	-0.204761	N	down	576.307	376.484	372.59	256.881	467.735	308.086	0.603235	N	up	383.861	412.405	266.469	256.881	315.494	336.877	-0.0930548	N	down	Klla0A	609710
KLLA0A06754g	YJL166W	XP_003957910.1	XP_003678296.1	XP_001646859.1	NP_984740.1	SAKL0C05214g	NA	NA	NP_594714.1	8568.72	5395.98	670.7	454.451	846.323	533.964	0.664466	N	up	No	No	11112.5	8300.45	977.791	677.156	1184.99	883.996	0.422692	N	up	5407.49	7588.44	464.283	677.156	582.589	811.448	-0.47816	N	down	9751.78	8313.95	874.94	677.156	1035.95	887.265	0.22336	N	up	Klla0A	611055
KLLA0A06776g	YKL171W	XP_003958212.1	XP_003675287.1	XP_001646384.1	NP_984741.1	SAKL0C05236g	XP_720970.1;XP_720970.1;XP_721092.1;XP_721092.1	XP_658701.1;XP_658701.1	NA	31.1849	16.4986	44.6575	24.574	56.6424	28.8818	0.972474	N	up	No	No	21.1228	25.4121	36.9487	40.6996	44.8269	53.1252	-0.262082	N	down	21.9926	23.2325	37.2209	40.6996	46.6898	48.7654	-0.0654983	N	down	16.2219	25.4545	29.1	40.6996	34.449	53.3216	-0.635902	N	down	Klla0A	612115
KLLA0A06798g	YKL170W	XP_003958213.1	XP_003675286.1	XP_001646860.1	NP_984742.1	SAKL0C05258g	XP_710513.1	XP_663750.1	NP_596481.2	365.325	375.634	69.0653	76.1771	86.6305	89.5161	-0.0476454	N	down	No	No	799.504	531.315	159.602	98.3622	193.402	128.388	0.590315	N	up	414.352	485.743	79.7633	98.3622	100.003	117.852	-0.23746	N	down	1054.79	532.196	214.454	98.3622	253.869	128.863	0.975975	N	up	Klla0A	614979
KLLA0A06820g	YJL165C;YKL168C	XP_003957911.1;XP_003958214.1	XP_003675285.1;XP_003678295.1	XP_001646383.1	NP_984743.1	SAKL0C05280g	NA	NA	NA	39.2837	43.7253	57.1403	66.7395	72.0887	78.4198	-0.121295	N	down	No	No	44.1264	54.5484	73.7938	84.2055	89.4351	109.97	-0.296066	N	down	48.8704	49.8679	77.9708	84.2055	97.8207	100.944	-0.0439086	N	down	40.2133	54.631	68.5699	84.2055	81.1716	110.376	-0.441854	N	down	Klla0A	615686
KLLA0A06842g	NA	NA	NA	NA	NP_984744.2	SAKL0C05302g	XP_714454.1;XP_714503.1	NA	NP_595675.1	19.8551	30.4742	21.0517	33.4086	26.2517	39.2516	-0.581815	N	down	No	No	39.0782	40.8409	54.9262	53.3181	66.541	69.6198	-0.0581143	N	down	25.1783	37.3369	33.8781	53.3181	42.4874	63.906	-0.587295	N	down	31.5174	40.9041	45.5492	53.3181	53.9343	69.8772	-0.372215	N	down	Klla0A	618848
KLLA0A06886g	YKR039W	XP_003954686.1;XP_003956170.1;XP_003956832.1;XP_003956833.1	XP_003675245.1	XP_001645774.1;XP_001646107.1;XP_001646108.1	NP_985777.1;NP_986246.1	SAKL0D00836g;SAKL0D04664g	XP_711412.1;XP_711447.1;XP_711464.1;XP_713900.1;XP_714102.1;XP_714611.1;XP_714699.1;XP_714743.1;XP_720611.1;XP_720739.1	XP_659263.1;XP_663282.1	NP_594316.1;NP_595000.1;NP_595008.3;NP_595051.2;NP_595053.1;NP_596348.1;NP_596769.2;NP_596849.1	44.7161	18.1486	45.2788	20.1853	57.1916	23.7164	1.26989	Y	up	Yes	No	34.4001	27.2547	43.2343	31.5539	52.3862	41.2226	0.358053	N	up	32.0641	24.9156	38.3779	31.5539	48.1857	37.8389	0.353577	N	up	24.0844	27.2937	30.8956	31.5539	36.5809	41.3749	-0.167185	N	down	Klla0A	621646
KLLA0A06930g	YKR039W	XP_003954686.1;XP_003956170.1	XP_003675245.1	XP_001646107.1;XP_001646108.1	NP_985777.1	SAKL0D00836g;SAKL0D04664g	XP_711412.1;XP_711447.1;XP_711464.1;XP_712311.1;XP_712455.1;XP_713900.1;XP_714102.1;XP_714611.1;XP_714699.1;XP_714743.1;XP_720611.1;XP_720739.1	XP_659263.1;XP_663282.1	NP_594316.1;NP_595000.1;NP_595008.3;NP_595051.2;NP_595053.1;NP_596348.1;NP_596769.2;NP_596849.1	15.0137	7.58401	15.307	8.65848	19.4679	10.1733	0.937515	N	up	No	No	14.9926	12.2811	18.7083	14.085	22.6815	18.3991	0.303639	N	up	11.4425	11.2272	13.677	14.085	17.166	16.8889	0.0309653	N	up	16.5705	12.2989	21.0115	14.085	24.8736	18.4671	0.44096	N	up	Klla0A	625498
KLLA0A06952g	YDR338C	XP_003957212.1	XP_003677146.1	XP_001642811.1	NP_984762.2	SAKL0G07832g	XP_712119.1;XP_712144.1;XP_718883.1;XP_718985.1;XP_719407.1;XP_719520.1;XP_719644.1	XP_658185.1	NP_588077.1;NP_592803.1;NP_594377.1	5.01117	7.50795	6.6737	10.1839	8.309	11.9648	-0.528429	N	down	No	No	7.87177	7.37952	12.2803	10.6651	14.892	13.9138	0.0637693	N	up	5.3126	6.74686	7.95087	10.6651	9.99995	12.7721	-0.371761	N	down	7.25952	7.39312	11.5011	10.6651	13.6178	13.9652	-0.0570862	N	down	Klla0A	628173
KLLA0A06974g	YHR090C	XP_003957270.1	XP_003677844.1	XP_001646519.1	NP_984761.1	SAKL0G07810g	XP_721001.1;XP_721122.1	XP_663174.1;XP_682395.1;XP_682395.1;XP_682395.1;XP_682395.1	NP_594080.1;NP_595444.1	25.1708	31.8725	14.89	19.609	18.6782	23.0394	-0.30403	N	down	No	No	51.2893	44.5948	29.2854	23.2328	35.498	30.3232	0.21834	N	up	37.884	40.7707	19.9598	23.2328	25.0189	27.8348	-0.155919	N	down	53.1147	44.6727	30.4737	23.2328	36.0698	30.4353	0.234922	N	up	Klla0A	630572
KLLA0A06996g	NA	NA	NA	NA	NP_984760.1	SAKL0G07788g	NA	XP_657665.1	NA	224.077	18.4151	70.358	6.12103	88.5276	7.19333	3.62085	Y	up	No	No	191.018	26.1338	69.0635	8.78483	83.7397	11.4943	2.90567	Y	up	73.2366	23.8884	25.8503	8.78483	32.4776	10.5505	1.64873	Y	up	156.911	26.1598	57.7007	8.78483	68.3245	11.5367	2.61627	Y	up	Klla0A	631799
KLLA0A07018g	YDR339C	XP_003957211.1	XP_003677147.1	XP_001646520.1	NP_984759.1	SAKL0G07766g	XP_710959.1;XP_710970.1	XP_664543.1	NP_595610.1	63.602	126.579	21.8018	45.0061	27.2063	52.8757	-0.959991	N	down	No	No	201.616	174.845	63.4165	50.981	76.8647	66.5201	0.201457	N	up	88.7359	159.853	26.9722	50.981	33.8268	61.0616	-0.856059	N	down	242.06	175.158	77.9361	50.981	92.2558	66.7662	0.458442	N	up	Klla0A	632523
KLLA0A07040g	YDR341C	XP_003955124.1;XP_003957271.1	XP_003677845.1	XP_001644207.1	NP_985344.1	SAKL0G07722g	XP_718164.1;XP_718431.1	XP_663972.1	NP_596077.1	214.665	147.411	274.891	201.138	348.213	236.324	0.559274	N	up	No	No	187.647	203.421	259.743	259.195	314.804	338.397	-0.10435	N	down	168.969	185.971	223.813	259.195	280.816	310.625	-0.145717	N	down	192.012	203.748	271.57	259.195	321.499	339.648	-0.0795241	N	down	Klla0A	633503
KLLA0A07051g	YHR079C-A	XP_003957259.1	XP_003677833.1	XP_001646506.1	NP_984390.1	SAKL0G08426g	XP_717533.1;XP_717607.1	NA	NP_595453.1	5.13712	3.23694	0.565246	0.419302	NA	NA	NA	NA	NA	No	No	4.63267	3.30156	0.718576	0.315655	NA	NA	NA	NA	NA	1.64575	3.01852	0.283077	0.315655	NA	NA	NA	NA	NA	3.47619	3.30768	0.392939	0.315655	NA	NA	NA	NA	NA	Klla0A	635924
KLLA0A07062g	YOR027W	XP_003956715.1	XP_003677321.1	XP_001647395.1	NP_984637.2	SAKL0G07084g	XP_714740.1	XP_682393.1	NP_588123.1	81.1778	102.067	125.3	163.956	157.175	192.655	-0.293829	N	down	No	No	239.758	228.403	294.938	258.921	357.467	337.916	0.0803122	N	up	211.239	208.815	250.992	258.921	314.889	310.186	0.0209638	N	up	265.941	228.793	334.987	258.921	396.592	339.166	0.224536	N	up	Klla0A	636546
KLLA0A07084g	YDR257C	XP_003958604.1	XP_003673744.1	XP_001647394.1	NP_984636.2	SAKL0G07062g	XP_712036.1;XP_712057.1	XP_664172.1	NP_594072.2	10.5446	22.3824	10.7356	22.693	13.3127	26.6617	-1.00412	Y	down	No	No	29.6061	17.6074	32.4057	17.8848	39.243	23.3312	0.748945	N	up	10.869	16.0976	11.5007	17.8848	14.4109	21.4168	-0.57756	N	down	54.7531	17.6385	61.2185	17.8848	72.4559	23.4175	1.61012	Y	up	Klla0A	638900
KLLA0A07106g	YOR026W	XP_003956714.1	XP_003673655.1	XP_001647393.1	NP_984635.1	SAKL0G07040g	XP_712037.1;XP_712058.1	XP_660043.1	NA	43.6313	51.8499	22.329	28.3131	28.1736	33.266	-0.239468	N	down	No	No	47.7	54.1349	27.8598	29.6724	33.776	38.7581	-0.198789	N	down	48.4662	49.4892	27.9402	29.6724	35.0411	35.5768	-0.0157865	N	down	47.1571	54.2137	29.0293	29.6724	34.3647	38.9013	-0.171809	N	down	Klla0A	640536
KLLA0A07128g	YDR479C	XP_003958605.1	XP_003673745.1	XP_001647392.1	NP_984634.2	SAKL0G07018g	XP_715640.1;XP_715696.1	XP_680946.1	NP_588367.1	24.8387	28.8467	22.7055	27.2699	28.7458	32.0448	-0.155799	N	down	No	No	26.9332	29.908	30.2569	30.7752	36.6795	40.193	-0.132694	N	down	29.7707	27.3418	31.243	30.7752	39.2172	36.894	0.0901028	N	up	28.3478	29.9532	32.2754	30.7752	38.2164	40.3415	-0.0723107	N	down	Klla0A	641974
KLLA0A07150g	YDR478W	XP_003958606.1	XP_003673746.1	XP_001643876.1	NP_984633.1	SAKL0G06996g	XP_715635.1;XP_715691.1	NA	XP_001713162.1	6.43605	16.2556	2.47626	5.70502	3.08861	6.69804	-1.12009	Y	down	No	No	22.2162	13.1497	7.40421	4.34032	8.96065	5.66292	0.687153	N	up	9.80885	12.022	3.31144	4.34032	4.15153	5.19824	-0.339768	N	down	28.9426	13.1721	9.9375	4.34032	11.7645	5.68386	1.02387	Y	up	Klla0A	643679
KLLA0A07172g	YOR025W	XP_003956713.1	XP_003677324.1	XP_001643875.1	NP_984632.2	SAKL0G06974g	XP_715641.1;XP_715697.1	XP_658830.1	NP_593659.1	40.3784	40.1729	32.6953	32.7396	40.7511	38.4659	0.0821141	N	up	No	No	54.0794	45.0656	51.2053	39.9282	62.0278	52.1077	0.253159	N	up	42.4047	41.2007	38.4397	39.9282	48.2732	47.8317	0.00672135	N	up	49.3812	45.1427	48.6799	39.9282	57.6116	52.3004	0.131242	N	up	Klla0A	644634
KLLA0A07194g	YOL121C;YNL302C	XP_003955408.1	XP_003673939.1;XP_003675817.1	XP_001642662.1	NP_983938.1	SAKL0C12584g	NA	XP_661664.1	NP_595221.1;NP_596593.1	2353.57	3156.01	1472.66	2077.53	1863.98	2441.07	-0.389112	N	down	No	No	2300.11	2768.5	1609.76	1792.04	1951.16	2340.13	-0.262243	N	down	2320.01	2530.96	1567.5	1792.04	1966.1	2148.06	-0.127651	N	down	2260.67	2772.73	1621.29	1792.04	1919.44	2348.78	-0.29118	N	down	Klla0A	646573
KLLA0A07227g	YNL301C;YOL120C	XP_003955407.1;XP_003956294.1	XP_003673938.1	XP_001644777.1	NP_983939.1	SAKL0C12562g	XP_723046.1;XP_723193.1	XP_663404.1	NP_001018228.1;NP_596397.1	1967.54	3374.56	1423.61	2626.03	1801.67	3085.71	-0.776252	N	down	No	No	1876.06	3298.06	1442.94	2352.85	1748.38	3071.72	-0.812904	N	down	2735.05	3015.14	2011.54	2352.85	2524.42	2819.63	-0.159583	N	down	1972.36	3303.36	1551.38	2352.85	1837	3083.07	-0.747025	N	down	Klla0A	648431
KLLA0A07249g	YOL119C	XP_003956293.1	XP_003674545.1	XP_001643119.1;XP_001645877.1	NP_983940.2;NP_983941.1	SAKL0B12738g;SAKL0C12540g;SAKL0F00330g	XP_717992.1;XP_718058.1;XP_718765.1;XP_718850.1;XP_720270.1;XP_720501.1;XP_722485.1;XP_722626.1	XP_659962.1;XP_660444.1;XP_661702.1;XP_662085.1;XP_682602.1	NA	136.021	99.2298	111.968	86.4109	140.66	101.533	0.470056	N	up	No	No	147.182	137.399	156.369	134.673	189.497	175.815	0.108223	N	up	117.135	125.613	119.497	134.673	150.033	161.386	-0.106318	N	down	162.701	137.622	175.617	134.673	207.886	176.465	0.235478	N	up	Klla0A	649905
KLLA0A07271g	NA	NA	NA	XP_001644776.1	NP_983942.1	SAKL0C12518g	XP_715859.1;XP_715909.1	XP_661291.1	NP_587706.1	667.415	430.415	228.626	156.88	287.314	184.335	0.640221	N	up	No	No	619.314	692.295	190.297	196.897	230.555	257.091	-0.155653	N	down	588.364	632.901	176.175	196.897	221.028	235.991	-0.0944159	N	down	338.915	693.382	107.949	196.897	127.828	258.042	-1.01291	Y	down	Klla0A	651863
KLLA0A07293g	YOL117W	XP_003956292.1	XP_003675819.1	XP_001644774.1	NP_983943.1	SAKL0C12496g	NA	NA	NA	22.8425	19.4406	22.7521	19.571	28.6066	22.9931	0.31435	N	up	No	No	29.8468	24.3785	36.84	28.3105	44.665	36.9643	0.266595	N	up	20.3912	22.2872	24.6363	28.3105	30.8891	33.9305	-0.133612	N	down	28.4773	24.4176	36.3916	28.3105	43.0857	37.1009	0.21561	N	up	Klla0A	652702
KLLA0A07315g	YNL300W	NA	XP_003673130.1	XP_001644773.1	NA	SAKL0C12474g	NA	NA	NA	769.765	1565.76	100.422	217.322	125.814	255.318	-1.0212	Y	down	No	Yes	1985.05	2209.92	237.248	242.689	287.334	316.629	-0.139551	N	down	1657.64	2020.44	190.622	242.689	239.036	290.648	-0.282936	N	down	2024.8	2213.89	247.745	242.689	293.346	317.8	-0.117108	N	down	Klla0A	655210
KLLA0A07337g	YOL116W	XP_003956290.1	XP_003675820.1	XP_001642661.1;XP_001644772.1	NP_983944.1	SAKL0C12452g	XP_713154.1;XP_713200.1;XP_718151.1;XP_718420.1	NA	NA	15.9397	19.8202	12.6721	16.1844	15.9969	19.0136	-0.249169	N	down	No	No	24.9323	30.8317	20.1854	22.8264	24.4651	29.8203	-0.276294	N	down	23.0716	28.1861	17.964	22.8264	22.5314	27.3726	-0.271582	N	down	19.5245	30.8779	15.8601	22.8264	18.7709	29.9305	-0.665097	N	down	Klla0A	656187
KLLA0A07359g	YNL299W;YOL115W	XP_003955406.1;XP_003956289.1	XP_003673936.1;XP_003675821.1	XP_001642660.1;XP_001644771.1	NP_984654.1	SAKL0C12430g	XP_715864.1;XP_715914.1	XP_663298.1	NP_001018181.1	17.4542	37.8001	25.6792	55.8586	31.942	65.6255	-1.03993	Y	down	No	No	37.9147	33.2291	55.7476	45.5255	67.5353	59.4195	0.186931	N	up	26.7061	30.3791	37.9467	45.5255	47.5874	54.5433	-0.199172	N	down	53.1677	33.2848	79.2164	45.5255	93.7649	59.6392	0.64693	N	up	Klla0A	657936
KLLA0A07381g	YOL114C	XP_003956288.1	XP_003675822.1	XP_001644770.1	NP_984655.1	SAKL0C12408g	XP_715860.1;XP_715910.1	XP_659187.1	NP_594059.1	55.2916	82.13	11.4288	18.3487	14.3565	21.5594	-0.58727	N	down	No	No	86.6819	53.4783	21.0989	12.0254	25.5736	15.6914	0.688042	N	up	40.3075	48.8917	9.38811	12.0254	11.7719	14.4038	-0.300574	N	down	86.721	53.5687	21.5738	12.0254	25.5347	15.7494	0.678007	N	up	Klla0A	660082
KLLA0A07403g	YOL113W;YNL298W	XP_003955405.1	XP_003673935.1	XP_001644336.1	NP_984656.1	SAKL0C12386g	XP_720551.1;XP_720678.1;XP_723385.1;XP_723573.1	XP_682105.1	NP_592864.1	28.3104	39.7711	50.5642	73.4018	63.2416	86.2479	-0.448285	N	down	No	No	33.8146	36.4842	64.3033	64.5964	77.9545	84.294	-0.120295	N	down	37.3747	33.3557	68.3699	64.5964	85.7926	77.3768	0.144658	N	up	33.3717	36.5484	65.1123	64.5964	77.0784	84.6057	-0.140487	N	down	Klla0A	661261
KLLA0A07425g	YNL297C	XP_003955404.1	XP_003673934.1	XP_001644769.1	NP_984657.1	SAKL0C12364g	XP_722150.1;XP_722264.1	XP_661247.1;XP_661247.1	NP_594550.1	41.9573	31.0252	110.965	85.3996	140.164	100.364	0.482041	N	up	No	No	22.9075	25.9746	81.7626	85.8065	99.1009	112.073	-0.175581	N	down	27.0679	23.7457	92.4021	85.8065	115.969	102.875	0.174378	N	up	22.0942	26.0133	80.4978	85.8065	95.2938	112.487	-0.236855	N	down	Klla0A	663956
KLLA0A07447g	YNL295W	XP_003955403.1	XP_003673933.1	XP_001644335.1	NP_984658.1	SAKL0C12342g	NA	NA	NA	26.7418	30.3361	26.979	31.155	33.974	36.6059	-0.107976	N	down	No	No	46.6814	40.4723	46.6752	37.2052	56.6165	48.5598	0.206885	N	up	30.2677	37.001	28.8435	37.2052	36.1633	44.5748	-0.303647	N	down	53.947	40.54	54.9912	37.2052	65.0991	48.7394	0.410772	N	up	Klla0A	669272
KLLA0A07469g	YNL294C	XP_003955402.1	XP_003673932.1	XP_001644334.1	NP_984659.1	SAKL0C12320g	XP_714594.1;XP_714725.1	XP_664490.1	NA	10.9457	10.1243	8.37197	8.01726	10.4911	9.41955	0.153164	N	up	No	No	20.3961	15.6269	22.487	15.4159	27.2488	20.1226	0.436573	N	up	10.2359	14.2866	10.6857	15.4159	13.3938	18.4713	-0.464349	N	down	20.9151	15.6529	23.1116	15.4159	27.3517	20.197	0.427586	N	up	Klla0A	670942
KLLA0A07491g	YNL293W;YOL112W	XP_003955401.1;XP_003956287.1	XP_003673931.1;XP_003675824.1	XP_001644333.1;XP_001644768.1	NP_984660.1	SAKL0C12298g	XP_714163.1;XP_714206.1	XP_660732.1	NP_587829.1	41.6864	47.4389	45.9914	53.8789	57.9866	63.3116	-0.126747	N	down	No	No	31.6887	43.3491	41.9921	52.7095	50.8817	68.8447	-0.427725	N	down	45.734	39.6293	58.7776	52.7095	73.7785	63.194	0.225393	N	up	34.8063	43.4136	47.7225	52.7095	56.4941	69.0991	-0.28656	N	down	Klla0A	673198
KLLA0A07513g	YOL111C	XP_003956286.1	XP_003675825.1	XP_001644332.1	NP_984661.1	SAKL0C12276g	XP_714600.1;XP_714731.1	NA	NA	125.043	113.834	50.4075	49.031	63.6385	57.6049	0.143863	N	up	No	No	145.181	168.333	54.9363	58.3877	66.5773	76.2723	-0.190051	N	down	145.238	153.886	51.3321	58.3877	64.4204	70.0117	-0.116786	N	down	150.393	168.572	57.8444	58.3877	68.4877	76.5541	-0.155035	N	down	Klla0A	675169
KLLA0A07535g	YOL110W	XP_003956285.1	XP_003675826.1	XP_001644331.1	NP_984662.2	SAKL0C12254g	XP_715661.1;XP_715718.1	NA	NA	5.138	7.72341	2.46739	3.69595	3.08407	4.34222	-0.49887	N	down	No	No	7.53767	9.61435	3.61255	4.27595	4.3895	5.59304	-0.397978	N	down	7.33786	8.78844	3.63537	4.27595	4.54983	5.13381	-0.122607	N	down	6.20264	9.6246	3.22282	4.27595	3.81288	5.61368	-0.512301	N	down	Klla0A	676032
KLLA0A07557g	YOR081C;YKR089C	XP_003957015.1;XP_003958572.1	XP_003673272.1;XP_003677274.1	XP_001643487.1;XP_001645729.1	NP_984327.2	SAKL0E14564g	XP_717704.1;XP_717798.1	XP_659317.1	NP_593197.1;XP_001713076.1	34.28	34.9047	51.241	54.9125	64.9089	64.527	0.00903655	N	up	No	No	21.5661	33.3591	36.385	51.8285	44.1326	67.7603	-0.619459	N	down	38.4066	30.4946	62.1821	51.8285	78.0684	62.1973	0.33456	N	up	20.0143	33.3997	34.3785	51.8285	40.7005	68.0105	-0.730529	N	down	Klla0A	677067
KLLA0A07579g	YOR080W	XP_003957016.1	XP_003677275.1	XP_001645728.1	NP_984326.2	SAKL0E14542g	XP_717707.1;XP_717801.1	XP_664603.1;XP_682382.1	NP_588152.1;NP_588152.1;NP_588152.1;NP_588152.1	38.0895	38.4285	52.2414	54.195	66.1087	63.6879	0.0541278	N	up	No	No	31.0679	40.0889	48.0615	56.895	58.2698	74.3171	-0.35197	N	down	46.1713	36.6487	68.5114	56.895	85.9714	68.2172	0.336762	N	up	34.1026	40.1477	53.7362	56.895	63.6192	74.5918	-0.22466	N	down	Klla0A	679469
KLLA0A07601g	YOR079C	XP_003957017.1	XP_003677276.1	XP_001645727.1	NP_984325.1	SAKL0E14520g	XP_717706.1;XP_717800.1	XP_663820.1	NA	228.696	515.72	110.924	271.727	141.384	319.335	-1.17516	Y	down	No	No	97.7668	232.303	63.2458	138.301	76.7164	180.925	-1.23852	Y	down	427.495	212.346	264.119	138.301	331.815	166.069	1.00083	Y	up	129.247	232.545	85.1695	138.301	100.845	181.592	-0.844814	N	down	Klla0A	682057
KLLA0A07623g	YOR078W	XP_003957018.1	XP_003677277.1	XP_001643488.1	NP_984324.2	SAKL0E14498g	NA	NA	NA	19.0136	46.2462	11.3767	28.3538	14.2174	33.3085	-1.22974	Y	down	No	Yes	87.7759	51.3077	40.3355	21.9193	48.8782	28.5588	0.758559	N	up	28.3037	46.9132	12.4725	21.9193	15.6442	26.2161	-0.757763	N	down	119.674	51.4214	55.897	21.9193	66.1904	28.6645	1.18612	Y	up	Klla0A	683112
KLLA0A07645g	NA	NA	NA	NA	NP_984323.2	SAKL0E14476g	XP_717700.1;XP_717794.1	NA	NA	23.8952	0.626676	10.9233	0.297793	13.8422	0.350239	5.29352	Y	up	Yes	No	29.4956	0.348843	15.0843	0.152528	18.272	0.197828	6.27343	Y	up	0.679296	0.319061	0.410368	0.152528	NA	NA	NA	NA	NA	58.1111	0.350053	30.4314	0.152528	36.0221	0.198563	7.23859	Y	up	Klla0A	684223
KLLA0A07667g	YKR088C	XP_003958573.1	XP_003673273.1	XP_001644279.1	NP_984322.1	SAKL0E14432g	XP_719098.1;XP_719215.1	XP_661183.1	NP_595882.2	170.101	93.4592	78.2882	45.5051	99.0582	53.466	0.889848	N	up	No	No	112.491	134.522	67.546	74.4323	81.8573	97.1904	-0.245672	N	down	112.927	122.98	64.4581	74.4323	80.9473	89.2137	-0.141323	N	down	105.651	134.731	64.4265	74.4323	76.2871	97.5497	-0.35364	N	down	Klla0A	685696
KLLA0A07689g	YOR077W	XP_003957019.1	XP_003677278.1	XP_001644280.1	NP_984321.1	SAKL0E14410g	XP_717222.1;XP_717298.1	XP_682629.1	NP_596038.1	8.73447	14.9548	3.75079	6.47356	4.67888	7.60596	-0.705986	N	down	No	No	20.3399	12.8812	9.21668	5.50238	11.1709	7.17706	0.608942	N	up	9.81999	11.7773	4.17397	5.50238	5.23295	6.58818	-0.353184	N	down	30.3148	12.9067	13.7027	5.50238	16.2127	7.20362	1.13648	Y	up	Klla0A	686738
KLLA0A07711g	YKR087C	XP_003958574.1	XP_003673274.1	XP_001647411.1	NA	SAKL0G00506g	XP_717231.1;XP_717307.1	XP_659454.1	NP_593540.1	22.3239	17.9843	15.2223	13.0643	19.222	15.3477	0.325056	N	up	No	No	41.1031	36.3992	28.0789	22.7517	34.0183	29.706	0.204059	N	up	22.4491	33.2767	14.8635	22.7517	18.6457	27.2679	-0.547932	N	down	41.2825	36.4577	28.7527	22.7517	34.0451	29.8158	0.191761	N	up	Klla0A	687735
KLLA0A07733g	YKR086W	XP_003958575.1	XP_003673275.1	XP_001647410.1	NP_984320.1	SAKL0G00528g	XP_715749.1;XP_715799.1	XP_661636.1;XP_663431.1	NP_595686.2;NP_595890.2	10.2492	11.0853	22.2304	24.584	27.811	28.8883	-0.0560223	N	down	No	No	12.6284	10.7496	29.7161	23.3955	36.0254	30.5312	0.224797	N	up	9.35179	9.82762	20.9041	23.3955	26.2203	28.0258	-0.102741	N	down	15.0353	10.7676	35.984	23.3955	42.5958	30.6441	0.463033	N	up	Klla0A	688856
KLLA0A07755g	YKR085C	XP_003958576.1	XP_003673283.1	XP_001647409.1	NP_984319.1	SAKL0G00550g	XP_712022.1;XP_712043.1	XP_661062.1	NP_587969.1	115.261	180.468	38.5293	63.2462	48.4731	74.3077	-0.616617	N	down	No	No	314.524	253.659	102.35	77.2342	124.034	100.769	0.296067	N	up	172.855	231.909	54.0631	77.2342	67.7953	92.5005	-0.451157	N	down	426.273	254.113	143.885	77.2342	170.364	101.142	0.74708	N	up	Klla0A	692606
KLLA0A07777g	NA	NA	NA	XP_001647408.1	NP_984318.1	SAKL0G00572g	NA	NA	NA	4.05464	17.1462	0.888942	4.01774	1.1089	4.71885	-2.09252	Y	down	No	No	31.7062	14.3872	8.08854	3.3096	9.79058	4.31546	1.18121	Y	up	12.5068	13.1544	3.03691	3.3096	3.80788	3.9614	-0.0911771	N	down	45.9512	14.4167	11.659	3.3096	13.7977	4.33143	1.62227	Y	up	Klla0A	693423
KLLA0A07799g	YKR084C	XP_003958577.1	XP_003673285.1	NA	NP_984317.2	SAKL0G00594g	XP_715193.1	XP_659667.1	XP_001713137.1	46.1488	55.4936	83.9257	104.518	105.448	122.818	-0.220223	N	down	No	No	49.5829	51.5902	103.206	98.1447	125.126	128.115	-0.0379282	N	down	54.1397	47.1651	106.788	98.1447	133.966	117.601	0.186792	N	up	50.6618	51.6755	106.674	98.1447	126.276	128.588	-0.0282883	N	down	Klla0A	694308
KLLA0A07821g	YOR075W	XP_003958578.1	XP_003673284.1	XP_001647407.1	NP_984316.2	SAKL0G00616g	XP_715190.1	NA	NP_588045.1	44.3814	33.6995	25.962	20.2983	32.6151	23.8539	0.450715	N	up	No	No	53.3364	42.2108	34.0486	24.6969	41.2507	32.2639	0.370241	N	up	41.1512	38.5877	25.1749	24.6969	31.5723	29.6156	0.101048	N	up	52.181	42.269	34.3218	24.6969	40.6316	32.3831	0.338307	N	up	Klla0A	697189
KLLA0A07843g	YOR074C	XP_003958579.1	XP_003677280.1	XP_001647406.1	NP_984315.1	SAKL0G00638g	XP_714908.1;XP_714971.1	XP_664632.1	NP_594305.1	54.4874	88.962	27.2973	45.9873	34.1867	54.0283	-0.661094	N	down	No	No	88.068	66.8081	52.9704	36.9366	64.174	48.1961	0.410874	N	up	53.9589	61.0792	31.2193	36.9366	39.1658	44.2412	-0.182429	N	down	73.0115	66.925	44.4461	36.9366	52.6197	48.3743	0.111524	N	up	Klla0A	698626
KLLA0A07865g	YOR073W	XP_003957021.1;XP_003957021.1	XP_003677281.1	XP_001647405.1	NP_984314.2	SAKL0G00660g	XP_714909.1;XP_714909.1;XP_714972.1;XP_714972.1;XP_714972.1;XP_714972.1	XP_659003.1	NP_594301.1;NP_595378.1	5.63901	10.8911	7.68354	15.158	9.56532	17.8124	-0.899344	N	down	No	No	10.8796	10.5902	13.8503	12.7216	16.7817	16.5891	0.00112527	N	up	10.2969	9.68243	12.5846	12.7216	15.8007	15.228	0.0314171	N	up	9.92159	10.6105	12.9232	12.7216	15.3025	16.6505	-0.146994	N	down	Klla0A	699725
KLLA0A07887g	YKR083C	XP_003956991.1	XP_003673279.1	XP_001647404.1	NP_984313.1	SAKL0G00682g	XP_714910.1	XP_659002.1	NA	38.3251	43.1773	6.52192	7.9025	8.18604	9.28721	-0.183469	N	down	No	No	42.0229	47.0063	7.86589	7.64087	9.52349	9.97897	-0.0261894	N	down	43.9398	42.9727	7.5937	7.64087	9.52202	9.15993	0.0642136	N	up	40.4521	47.0761	7.39007	7.64087	8.7462	10.0158	-0.192894	N	down	Klla0A	702046
KLLA0A07909g	YKR082W	XP_003958580.1	XP_003673280.1	XP_001647403.1	NP_984312.2	SAKL0G00704g	XP_714911.1;XP_714973.1	XP_661897.1	NP_593915.1	39.1708	49.956	75.3767	98.4354	94.6599	115.668	-0.289351	N	down	No	No	42.152	44.3167	102.601	98.7352	124.38	128.891	-0.0542423	N	down	37.2802	40.5153	86.6189	98.7352	108.633	118.313	-0.123624	N	down	44.8118	44.389	111.271	98.7352	131.724	129.368	0.0242991	N	up	Klla0A	702533
KLLA0A07931g	YKR081C	XP_003957023.1	XP_003677282.1	XP_001647402.1	NP_984311.1	SAKL0G00726g	XP_714912.1;XP_714974.1	NA	NP_594369.1	99.0203	161.314	63.1188	107.513	78.7391	126.317	-0.682451	N	down	No	No	199.169	183.897	135.73	115.094	164.491	150.112	0.1287	N	up	104.72	168.132	69.0966	115.094	86.5893	137.795	-0.671709	N	down	247.156	184.242	171.51	115.094	203.039	150.668	0.426064	N	up	Klla0A	706289
KLLA0A07953g	YKR080W	XP_003958581.1	XP_003673282.1	XP_001643489.1	NP_984310.1	SAKL0G00748g	XP_717215.1;XP_717291.1	XP_659128.1	NP_595877.1	126.906	141.133	65.4777	75.7741	82.0496	89.0354	-0.118366	N	down	No	No	116.162	153.537	74.8305	90.1471	90.6931	117.707	-0.375552	N	down	119.911	140.365	72.6199	90.1471	91.0594	108.047	-0.24576	N	down	150.66	153.78	98.2452	90.1471	116.325	118.142	-0.0219324	N	down	Klla0A	707461
KLLA0A07975g	YOR070C	XP_003957024.1	XP_003677283.1	XP_001647401.1	NP_984309.2	SAKL0G00770g	XP_717216.1;XP_717292.1	XP_680713.1	NP_595314.1	55.0056	32.3669	52.9736	32.3447	67.3218	38.0008	0.82547	N	up	No	No	34.0188	39.7659	38.6978	41.834	46.8982	54.6357	-0.21528	N	down	39.4202	36.3537	43.4771	41.834	54.5636	50.1514	0.123694	N	up	34.2392	39.8257	40.1258	41.834	47.4985	54.8376	-0.204228	N	down	Klla0A	709271
KLLA0A07997g	YJR052W	XP_003959196.1	XP_003674243.1	XP_001646217.1	NP_983316.1	SAKL0D12188g	XP_722404.1;XP_722541.1	XP_661875.1	NP_587702.1	9.13772	16.1443	10.351	18.6998	12.9738	21.9739	-0.761705	N	down	No	No	17.6208	16.867	21.0019	18.5562	25.4699	24.2233	0.0536067	N	up	13.2365	15.4202	15.6244	18.5562	19.5748	22.2354	-0.182295	N	down	19.3652	16.8946	23.7203	18.5562	28.0863	24.3129	0.203907	N	up	Klla0A	711231
KLLA0A08019g	YML046W	XP_003957331.1	XP_003677660.1	XP_001646216.1	NP_983315.3	SAKL0D12210g	XP_722403.1;XP_722540.1	XP_659239.1	NP_596426.1	18.5041	27.1416	18.9992	28.6075	23.8128	33.6154	-0.498555	N	down	No	No	26.0101	26.734	33.8374	32.2134	41.0037	42.0541	-0.0348301	N	down	23.5897	24.4408	29.2168	32.2134	36.6547	38.6027	-0.0765578	N	down	27.2815	26.7777	36.3124	32.2134	42.9921	42.2095	0.0235412	N	up	Klla0A	713019
KLLA0A08041g	YJR053W	XP_003957228.1	XP_003674244.1	XP_001646215.1	NP_983314.1	SAKL0D12232g	XP_718938.1;XP_719042.1	XP_868795.1	NP_593149.1	16.0265	21.9223	19.3613	27.3323	24.2823	32.1181	-0.404404	N	down	No	No	26.8982	28.606	34.3433	33.7105	41.6438	44.0233	-0.086697	N	down	23.3747	26.1514	28.4009	33.7105	35.6617	40.4101	-0.180389	N	down	25.0104	28.6491	32.5234	33.7105	38.4966	44.186	-0.197035	N	down	Klla0A	715347
KLLA0A08063g	YJR054W	XP_003957229.1;XP_003957330.1	XP_003674245.1;XP_003677661.1	XP_001644176.1	NP_985925.2	SAKL0D12276g	XP_720886.1;XP_721399.1	NA	NA	94.1823	64.2924	80.478	57.1872	101.739	67.199	0.598563	N	up	No	No	63.3864	68.9059	66.7485	67.5006	80.914	88.1806	-0.121788	N	down	53.1472	62.9924	53.5444	67.5006	67.183	80.9425	-0.265192	N	down	67.8252	69.0054	73.1679	67.5006	86.6323	88.5064	-0.0257379	N	down	Klla0A	717703
KLLA0A08107g	YML048W	XP_003957329.1	XP_003677572.1	XP_001646214.1	NP_985928.1	SAKL0D12320g	XP_718940.1;XP_719044.1	NA	NA	592.767	379.616	371.178	253.945	469.679	298.409	0.654444	N	up	No	No	318.175	545.989	249.369	394.694	302.343	515.651	-0.770403	N	down	590.605	499.129	444.459	394.694	557.433	473.324	0.236651	N	up	271.226	546.761	216.976	394.694	256.857	517.556	-1.0099	Y	down	Klla0A	719825
KLLA0A08129g	YML049C	XP_003957328.1	XP_003677573.1	XP_001644175.1	NP_985929.2	SAKL0D12342g	XP_717672.1;XP_717766.1	XP_663056.1	NP_594414.1	15.6572	19.3093	34.3904	43.7194	43.3076	51.3738	-0.246553	N	down	No	No	18.5185	23.0117	51.6063	59.5909	62.569	77.8036	-0.32021	N	down	22.6344	21.0377	60.2158	59.5909	75.5648	71.4182	0.0806663	N	up	18.5289	23.0488	52.6587	59.5909	62.3366	78.0912	-0.326178	N	down	Klla0A	722217
KLLA0A08140g	YML050W	NA	XP_003677574.1	NA	NP_985930.1	SAKL0D12364g	XP_714198.1;XP_714238.1	XP_664131.1	NA	24.1722	19.7725	12.9754	11.0744	16.3728	13.0114	0.331419	N	up	No	No	32.0602	32.4026	19.1609	17.8326	23.2191	23.293	0.00844244	N	up	24.5304	29.6218	13.9649	17.8326	17.5185	21.3812	-0.279763	N	down	30.23	32.4495	18.524	17.8326	21.9357	23.3791	-0.0805158	N	down	Klla0A	726017
KLLA0A08162g	YML051W	XP_003957327.1	XP_003674247.1;XP_003677575.1	XP_001644173.1	NA	Sklu_YGOB_Anc_1.500b	NA	XP_662727.1	NP_593980.1	56.2487	40.555	49.3587	37.9793	63.48	44.6297	0.508694	N	up	No	No	44.369	63.2888	41.501	54.134	50.3707	70.6579	-0.504688	N	down	69.3107	57.8605	61.994	54.134	77.8013	64.8594	0.259024	N	up	39.8995	63.3945	37.796	54.134	44.7377	70.9192	-0.670102	N	down	Klla0A	727416
KLLA0A08184g	YML052W	XP_003957326.1	XP_003677576.1	XP_001646213.1	NP_985915.1	SAKL0D12430g	XP_716663.1;XP_716723.1	XP_662219.1	NA	265.144	350.859	124.572	177.955	157.347	209.12	-0.410243	N	down	No	No	376.491	447.109	217.215	235.832	263.239	307.958	-0.225702	N	down	500.65	408.747	274.78	235.832	345.066	282.682	0.287551	N	up	265.969	447.794	155.578	235.832	184.164	309.096	-0.746922	N	down	Klla0A	729440
KLLA0A08206g	NA	NA	NA	NA	NA	SAKL0D12496g	XP_716351.1;XP_716413.1	NA	NA	12.5293	18.8531	4.64294	7.36598	5.85886	8.6553	-0.561564	N	down	No	No	12.1826	14.9563	4.75765	5.50729	5.7713	7.19662	-0.330195	N	down	19.3632	13.6724	7.38377	5.50729	9.27053	6.60586	0.50633	N	up	7.65748	14.976	3.12696	5.50729	3.70366	7.2232	-0.930505	N	down	Klla0A	730940
KLLA0A08316g	NA	NA	NA	NA	NA	SAKL0D09658g	NA	XP_680769.1	NA	79.8174	84.3786	117.316	131.419	147.9	154.443	-0.0623743	N	down	No	No	93.3799	83.5364	140.479	115.637	170.333	150.899	0.170345	N	up	82.5364	76.3727	117.871	115.637	147.879	138.516	0.0920418	N	up	86.5798	83.6814	132.767	115.637	157.134	151.457	0.0497307	N	up	Klla0A	733200
KLLA0A08338g	YHR015W;YFR023W	XP_003954671.1	XP_003673837.1;XP_003675179.1	XP_001643543.1;XP_001647444.1	NP_984845.2	SAKL0D09680g	NA	NA	NA	18.239	21.9944	26.6015	32.2915	33.4936	37.9444	-0.180266	N	down	No	No	17.3793	10.7961	28.881	16.6762	35.0163	21.7749	0.678254	N	up	10.9153	9.86991	17.4292	16.6762	21.8673	19.9878	0.13045	N	up	24.6413	10.8133	41.9206	16.6762	49.6162	21.8554	1.18178	Y	up	Klla0A	736461
KLLA0A08360g	YFR024C-A;YHR016C	XP_003954670.1;XP_003956565.1	XP_003673838.1;XP_003675180.1	XP_001643544.1	NP_984844.1	SAKL0D09702g	XP_710285.1	XP_661772.1	NP_593048.1	209.554	142.286	226.525	164.315	286.57	193.077	0.569806	N	up	No	No	212.939	215.132	254.066	236.927	307.989	309.341	-0.00695845	N	down	207.919	196.675	238.063	236.927	298.836	283.953	0.0733973	N	up	212.825	215.471	261.15	236.927	309.178	310.484	-0.00621895	N	down	Klla0A	739092
KLLA0A08382g	YHR017W	XP_003954669.1	XP_003673839.1	XP_001647445.1	NP_984843.1	SAKL0D09724g	NA	NA	NA	135.076	46.9819	82.9927	30.4034	104.992	35.7259	1.55537	Y	up	Yes	No	84.8087	84.0231	68.0251	61.4077	82.4788	80.2272	0.0406658	N	up	75.8312	76.8123	57.8039	61.4077	72.5165	73.6418	-0.0177112	N	down	63.9454	84.1447	52.3376	61.4077	61.9762	80.5236	-0.371126	N	down	Klla0A	741712
KLLA0A08404g	YHR018C	XP_003954668.1	XP_003673840.1	XP_001647446.1	NP_984842.1	SAKL0D09746g	XP_712117.1;XP_712142.1	XP_660518.1	NP_595129.1;NP_596817.1	148.089	122.327	120.932	105.869	153.089	124.412	0.29949	N	up	No	No	210.216	240.573	201.027	212.152	243.676	277.022	-0.185305	N	down	256.529	219.933	233.35	212.152	292.843	254.286	0.203692	N	up	185.718	240.945	181.106	212.152	214.41	278.046	-0.374767	N	down	Klla0A	743192
KLLA0A08426g	YHR019C	XP_003954667.1	XP_003673841.1	XP_001647447.1	NP_984841.2	SAKL0D09768g	XP_712129.1;XP_712154.1	XP_680748.1	NP_595125.1	129.585	162.716	166.957	222.679	211.094	261.628	-0.309517	N	down	No	No	239.096	256.862	277.129	274.106	335.898	357.907	-0.0915999	N	down	249.118	234.825	276.607	274.106	347.035	328.533	0.0791086	N	up	255.843	257.265	302.517	274.106	358.16	359.23	-0.00423557	N	down	Klla0A	745048
KLLA0A08448g	YHR020W	XP_003954666.1	XP_003673842.1	XP_001643545.1	NP_984840.1	SAKL0D09812g	XP_712128.1;XP_712153.1	XP_659754.1	NP_596162.1	315.826	273.038	461.395	425.071	584.004	499.489	0.225576	N	up	No	No	319.632	400.583	460.146	531.366	557.775	693.543	-0.314837	N	down	362.553	366.226	500.104	531.366	627.62	636.628	-0.0209253	N	down	329.612	401.256	485.124	531.366	574.29	696.108	-0.278029	N	down	Klla0A	747134
KLLA0A08470g	YFR025C	XP_003956564.1	XP_003675181.1	XP_001647448.1	NP_984839.2	SAKL0D09834g	XP_712126.1;XP_712151.1	XP_664648.1	NP_587872.3	109.447	129.935	58.175	71.3672	72.8697	83.8518	-0.203085	N	down	No	No	107.265	147.403	70.1575	86.997	85.098	113.757	-0.418461	N	down	177.305	134.743	108.685	86.997	136.383	104.418	0.390187	N	up	101.764	147.572	66.9428	86.997	79.2672	114.177	-0.520188	N	down	Klla0A	749442
KLLA0A08492g	NA	NA	NA	XP_001647442.1	NA	SAKL0D09856g	XP_721292.1;XP_721563.1	XP_657778.1	NA	656.695	482.807	422.279	321.462	530.03	377.705	0.488754	N	up	No	No	434.96	535.099	317.238	360.121	384.707	471.053	-0.291559	N	down	849.267	489.133	593.244	360.121	744.635	432.376	0.785328	N	up	385.426	535.674	287.351	360.121	340.281	472.792	-0.473093	N	down	Klla0A	751047
KLLA0A08536g	YCL005W	XP_003959143.1	XP_003675833.1	XP_001646667.1	NP_982538.1	SAKL0D08998g	NA	XP_659534.1	NA	20.3844	27.7718	9.64879	13.7156	12.2036	16.1159	-0.400428	N	down	No	No	21.2133	28.5904	12.4776	15.1739	15.1242	19.815	-0.389106	N	down	33.019	26.1378	17.9973	15.1739	22.5727	18.1887	0.314987	N	up	19.049	28.6366	11.2495	15.1739	13.3203	19.8882	-0.57284	N	down	Klla0A	753262
KLLA0A08580g	YCL004W	XP_003959144.1	XP_003675853.1	NA	NP_982539.1	SAKL0D08954g	XP_720364.1	XP_659865.1	NP_595992.2	55.5663	51.3338	52.0191	49.7102	65.7531	58.4089	0.171218	N	up	No	No	65.7139	62.8115	74.8113	65.9756	90.716	86.1102	0.0671515	N	up	48.7932	57.4244	53.5929	65.9756	67.2233	79.0436	-0.235885	N	down	62.5847	62.9177	72.7567	65.9756	86.1237	86.4286	-0.00954993	N	down	Klla0A	754857
KLLA0A08602g	YCL002C	XP_003959145.1	XP_003675854.1	XP_001647004.1	NA	SAKL0D08932g	XP_720365.1	NA	NA	51.2686	51.3691	20.6251	21.6574	25.9547	25.4435	0.0281106	N	up	No	No	44.836	45.2148	27.0929	25.9104	32.83	33.8397	-0.0341944	N	down	42.6386	41.3356	25.4048	25.9104	31.8562	31.0623	0.041629	N	up	43.751	45.2851	27.1269	25.9104	32.1169	33.9648	-0.0746074	N	down	Klla0A	756584
KLLA0A08624g	YCL001W	XP_003958853.1	XP_003675855.1	XP_001647005.1	NP_982540.1	SAKL0D08910g	XP_715250.1	XP_663519.1	NP_594831.1	288.712	216.473	74.6996	58.4316	93.6836	68.6563	0.448054	N	up	No	No	309.141	292.794	92.6582	81.7164	112.258	106.741	0.0786633	N	up	240.682	267.671	70.247	81.7164	88.0616	97.9797	-0.150911	N	down	276.678	293.236	84.9056	81.7164	100.517	107.135	-0.0886199	N	down	Klla0A	758042
KLLA0A08646g	YNL001W	XP_003958852.1	XP_003675856.1;XP_003677566.1	XP_001647006.1	NP_982541.1	SAKL0D08888g	XP_713252.1;XP_713305.1	XP_662134.1	NP_587936.1	128.946	109.92	84.9523	74.2579	106.261	87.2688	0.283716	N	up	No	No	148.523	110.61	115.772	79.4632	140.283	103.818	0.439645	N	up	120.916	101.117	90.8413	79.4632	113.984	95.2964	0.261819	N	up	116.082	110.767	92.2418	79.4632	109.196	104.202	0.0721167	N	up	Klla0A	758933
KLLA0A08690g	NA	NA	NA	NA	NA	NA	NA	XP_868808.1	NA	50.9946	10.7846	27.2894	6.01919	34.358	7.0716	2.27906	Y	up	Yes	No	41.7397	7.32618	25.7594	4.17771	31.2222	5.45491	2.51474	Y	up	9.57324	6.69782	5.82494	4.17771	7.31379	5.00721	0.542632	N	up	26.8535	7.33842	16.8305	4.17771	19.9305	5.47507	1.86572	Y	up	Klla0A	761149
KLLA0A08712g	YGR001C	XP_003958064.1	XP_003673464.1	XP_001645202.1	NP_985547.1	SAKL0H22572g	XP_717240.1;XP_717316.1	NA	NA	91.4349	96.8741	37.2806	41.1338	46.8442	48.3252	-0.0453022	N	down	No	No	163.515	116.402	73.0546	47.4551	88.5187	61.9423	0.514809	N	up	83.2585	106.418	35.3467	47.4551	44.3487	56.859	-0.361479	N	down	168.851	116.595	76.8818	47.4551	91.0122	62.1714	0.545088	N	up	Klla0A	762700
KLLA0A08734g	YAL001C	XP_003955224.1	XP_003678424.1	XP_001644973.1	NP_985546.2	SAKL0H22550g	XP_717237.1;XP_717313.1	XP_680611.1	NP_596127.1	12.7442	11.9317	33.4848	31.9481	41.8649	37.5449	0.156242	N	up	No	No	14.3043	14.341	37.0885	34.0887	44.9398	44.5172	0.0215997	N	up	12.4105	13.1106	30.6835	34.0887	38.4873	40.8634	-0.0834269	N	down	11.8343	14.3631	31.3129	34.0887	37.0562	44.6817	-0.269748	N	down	Klla0A	763946
KLLA0A08756g	YAR002W	XP_003955221.1	NA	XP_001645466.1	NP_985544.1	SAKL0H22462g	XP_715556.1;XP_715612.1	NA	NP_588341.1	56.6899	93.6339	68.6681	118.34	86.5263	139.05	-0.684406	N	down	No	No	114.028	122.96	145.294	144.763	176.139	188.93	-0.103725	N	down	106.84	112.414	130.55	144.763	163.832	173.426	-0.0837133	N	down	125.164	123.168	163.322	144.763	193.33	189.629	0.025755	N	up	Klla0A	767756
KLLA0A08778g	YAR002C-A;YHR110W;YGL002W	XP_003955220.1;XP_003957282.1	XP_003678426.1	XP_001645467.1	NP_985543.1	SAKL0H22440g	NA	XP_662050.1	NP_595791.1	274.708	349.825	82.2501	113.176	104.086	132.986	-0.353164	N	down	No	No	308.092	366.268	115.621	126.644	140.188	165.406	-0.239966	N	down	335.185	334.839	120.397	126.644	151.074	151.83	-0.00609702	N	down	262.043	366.816	101.32	126.644	119.946	166.018	-0.467407	N	down	Klla0A	769697
KLLA0A08800g	YAR003W	XP_003955219.1	XP_003678427.1	XP_001645468.1	NP_985542.1	SAKL0H22418g	XP_717669.1;XP_717763.1	XP_658412.1	NP_593795.1	30.1947	38.5051	20.3288	27.1608	25.584	31.9088	-0.319117	N	down	No	No	41.0966	43.8974	36.2598	35.8254	43.9421	46.8015	-0.0814047	N	down	37.6825	40.1301	31.9137	35.8254	40.0508	42.9599	-0.095685	N	down	36.2423	43.9608	32.4894	35.8254	38.4553	46.9744	-0.281563	N	down	Klla0A	770989
KLLA0A08822g	YGL003C	XP_003955218.1	XP_003678428.1	XP_001645469.1	NP_985541.2	SAKL0H22396g	XP_719530.1;XP_719654.1	XP_660569.1	NP_593161.1;NP_594674.1;NP_595081.1	12.4224	13.0744	13.6052	14.6061	17.1021	17.1625	-0.00597434	N	down	No	No	13.5872	17.3698	16.855	19.8997	20.4187	25.984	-0.33308	N	down	16.7799	15.8794	19.8354	19.8997	24.9064	23.8514	0.0604377	N	up	16.4409	17.3964	20.8927	19.8997	24.7326	26.08	-0.0765094	N	down	Klla0A	772565
KLLA0A08844g	YAR007C	XP_003955217.1	XP_003678429.1	XP_001644975.1	NP_985540.1	SAKL0H22352g	XP_719539.1;XP_719663.1	XP_680692.1	NP_595092.1	75.618	80.2217	101.627	111.054	127.26	130.489	-0.0363296	N	down	No	No	92.3862	57.2291	123.317	70.3733	149.444	91.8651	0.70112	N	up	60.5405	52.32	78.0914	70.3733	98.0679	84.326	0.215354	N	up	59.1782	57.322	80.9952	70.3733	95.8797	92.2047	0.0536967	N	up	Klla0A	774642
KLLA0A08866g	YGL004C	XP_003958065.1	XP_003673591.1	NA	NP_985539.1	SAKL0H22330g	NA	NA	NA	82.3056	76.0348	57.9464	55.8356	73.5798	65.6084	0.166007	N	up	No	No	54.9716	62.4246	47.3178	49.5915	57.3829	64.7859	-0.17813	N	down	70.8025	57.0671	58.636	49.5915	73.5997	59.4681	0.311455	N	up	59.6631	62.5137	52.7838	49.5915	62.4966	65.0253	-0.0500055	N	down	Klla0A	776960
KLLA0A08888g	YGL005C	XP_003958066.1	XP_003673592.1	XP_001645471.1	NP_985538.1	SAKL0H22308g	XP_717678.1;XP_717772.1	NA	NP_587673.1;NP_588572.1;XP_004001704.1	55.5476	67.171	22.3108	27.267	27.98	32.0446	-0.19652	N	down	No	No	74.998	76.081	34.6369	32.7441	41.9879	42.7458	-0.0321633	N	down	74.4524	69.5542	33.7603	32.7441	42.36	39.2377	0.107826	N	up	66.8206	76.2022	31.6897	32.7441	37.515	42.9038	-0.197861	N	down	Klla0A	778534
KLLA0A08910g	YGL006W	XP_003958067.1	XP_003673593.1	XP_001645472.1	NP_985537.1	SAKL0H22286g	XP_721678.1;XP_721798.1	XP_658793.1;XP_660431.1;XP_662524.1;XP_662692.1;XP_681668.1	NP_593890.1	43.1795	30.3806	106.102	77.4705	133.245	91.0316	0.549537	N	up	No	No	33.8891	33.1133	97.1559	87.3988	117.735	114.085	0.0451845	N	up	24.8951	30.273	68.6197	87.3988	86.1089	104.723	-0.284138	N	down	28.8018	33.168	84.105	87.3988	99.5592	114.507	-0.204401	N	down	Klla0A	779526
KLLA0A08932g	YAR008W	XP_003955216.1	XP_003678430.1	XP_001645473.1	NP_985536.2	SAKL0H22264g	XP_712808.1;XP_712837.1	XP_657794.1	NP_596163.1	19.4366	41.0017	11.572	24.6478	14.4622	28.9559	-1.00301	Y	down	No	Yes	43.3913	39.1589	24.1907	20.2668	29.2972	26.4569	0.159535	N	up	33.6607	35.7995	18.23	20.2668	22.8612	24.2856	-0.0886969	N	down	47.0535	39.2211	27.2139	20.2668	32.2097	26.5547	0.271603	N	up	Klla0A	784599
KLLA0A09031g	YGL008C;YPL036W	XP_003958068.1;XP_003958069.1	XP_003673594.1;XP_003674998.1	XP_001644976.1	NP_986581.1	SAKL0H22066g	XP_717665.1;XP_717759.1	XP_657922.1;XP_662463.1	NP_587959.2;NP_594360.1	446.753	605.595	880.104	1302.36	1110.88	1530.31	-0.462105	N	down	No	No	956.175	814.924	1891.12	1485.83	2291.49	1938.74	0.241059	N	up	669.202	745.044	1270.87	1485.83	1595.39	1779.65	-0.157884	N	down	925.733	816.358	1867.25	1485.83	2210.5	1945.91	0.18366	N	up	Klla0A	787768
KLLA0A09075g	YPL171C;YHR179W	XP_003956141.1;XP_003957301.1;XP_003957522.1;XP_003958084.1;XP_003958085.1;XP_003958086.1	XP_003674534.1;XP_003674569.1;XP_003675582.1;XP_003675765.1;XP_003676072.1;XP_003676368.1;XP_003676816.1;XP_003678492.1	XP_001642633.1;XP_001645827.1;XP_001647443.1	NP_986995.1	SAKL0C00396g;SAKL0H22044g	XP_714056.1;XP_714331.1;XP_715292.1;XP_715357.1;XP_716681.1;XP_716690.1;XP_716691.1;XP_716740.1;XP_716749.1;XP_716750.1;XP_717859.1;XP_717925.1;XP_718652.1	XP_661749.1;XP_662832.1;XP_682446.1;XP_682614.1	NP_592817.1;NP_592823.1	1513.47	1310.11	1266.37	1174.8	1602.96	1380.42	0.215646	N	up	No	No	909.033	493.155	747.646	375.868	906.662	491.335	0.884489	N	up	801.254	450.813	635.331	375.868	797.745	450.999	0.823624	N	up	1094.09	493.779	926.504	375.868	1097.04	493.149	1.1548	Y	up	Klla0A	792171
KLLA0A09097g	YGL014W	XP_003958070.1	XP_003673595.1	XP_001645474.1	NP_986580.2	SAKL0H22022g	XP_717664.1;XP_717758.1	XP_657924.1	NP_593062.1;NP_594123.1	118.117	110.083	184.625	183.704	234.273	215.853	0.118302	N	up	No	No	107.563	129.064	189.904	210.317	230.15	274.536	-0.254749	N	down	126.593	117.993	214.459	210.317	269.099	252.006	0.0940379	N	up	117.056	129.276	210.807	210.317	249.543	275.552	-0.144011	N	down	Klla0A	794827
KLLA0A09119g	YGL013C;YBL005W	XP_003955239.1;XP_003958071.1;XP_003958072.1	XP_003673114.1;XP_003673305.1	XP_001645475.1	NP_985040.1	SAKL0D01100g	XP_710938.1;XP_711432.1;XP_714604.1;XP_714607.1;XP_714734.1;XP_714739.1;XP_718000.1;XP_718067.1;XP_720272.1;XP_720503.1;XP_720596.1;XP_720724.1;XP_721642.1;XP_721762.1;XP_722407.1;XP_722408.1;XP_722545.1;XP_722546.1;XP_722640.1;XP_722785.1	XP_658172.1;XP_658439.1;XP_658457.1;XP_658481.1;XP_658532.1;XP_658738.1;XP_659245.1;XP_659620.1;XP_660389.1;XP_660430.1;XP_660821.1;XP_661504.1;XP_661722.1;XP_661851.1;XP_662576.1;XP_663412.1;XP_664450.1;XP_680492.1;XP_680776.1;XP_680879.1;XP_681136.1;XP_681446.1;XP_681660.1;XP_681683.1;XP_681778.1;XP_681804.1;XP_681859.1;XP_681882.1;XP_682004.1;XP_682154.1;XP_682294.1;XP_682419.1	NP_001018765.1;NP_593664.2;NP_594000.1;NP_594923.1;NP_595131.1;NP_595318.2;NP_596537.1	49.7657	30.2802	94.4015	59.3082	119.305	69.687	0.775852	N	up	No	No	29.8647	24.6625	72.4219	54.7764	87.7695	71.5013	0.29381	N	up	21.3987	22.5472	49.6298	54.7764	62.2562	65.6335	-0.0781538	N	down	30.3915	24.7038	74.6936	54.7764	88.4228	71.7657	0.297268	N	up	Klla0A	797533
KLLA0A09141g	YHR172W	XP_003957517.1	XP_003676077.1	XP_001645152.1	NP_985152.1	SAKL0H02046g	XP_711781.1;XP_711799.1	XP_663477.1	NP_596044.1	5.91815	8.11396	8.29244	11.6383	10.3376	13.6745	-0.406581	N	down	No	No	9.01562	7.41291	14.737	11.3258	17.8715	14.7903	0.259554	N	up	6.75512	6.77691	10.6753	11.3258	13.3896	13.5764	-0.015431	N	down	6.75632	7.42441	11.3514	11.3258	13.4428	14.845	-0.135505	N	down	Klla0A	801373
KLLA0A09185g	YGR254W;YMR323W;YHR174W;YPL281C;YOR393W	XP_003955874.1;XP_003957518.1	XP_003675917.1;XP_003676076.1	XP_001642313.1;XP_001647085.1	NP_985151.1	SAKL0H02024g	XP_711883.1;XP_711912.1	XP_663350.1	NP_001018769.2;NP_595903.1	12901.1	16120.7	15109.6	21333.7	19264.6	25069.7	-0.379993	N	down	No	No	10768.7	13125.3	9616.68	10798.6	11658.9	14112.8	-0.275549	N	down	22556.3	11998.5	19321.2	10798.6	24262.9	12954.3	0.905348	N	up	12724.4	13142.5	11611.4	10798.6	13750.6	14164.9	-0.0427876	N	down	Klla0A	804448
KLLA0A09207g	YHR175W	XP_003957519.1	XP_003676075.1	XP_001642312.1	NP_985150.1	SAKL0H02002g	XP_709974.1;XP_723217.1;XP_723407.1	XP_660538.1	NP_594269.1;NP_595861.1	430.721	241.873	70.8726	42.2968	89.5409	49.7015	0.849377	N	up	No	No	454.743	393.551	85.4555	67.8457	103.546	88.5827	0.227589	N	up	288.782	359.789	52.301	67.8457	65.6107	81.3126	-0.309433	N	down	363.267	394.176	69.9785	67.8457	82.8494	88.9101	-0.102181	N	down	Klla0A	806124
KLLA0A09229g	YHR176W	XP_003957520.1	XP_003676074.1	XP_001642311.1	NP_985149.1	SAKL0H01980g	NA	XP_661714.1	NA	26.489	10.2244	20.129	8.46297	25.4551	9.94156	1.35604	Y	up	No	No	25.5722	18.8159	22.2041	15.2047	26.9139	19.8509	0.434967	N	up	16.4501	17.202	13.9373	15.2047	17.4865	18.2218	-0.0610793	N	down	25.1896	18.8471	22.5719	15.2047	26.7181	19.9243	0.419099	N	up	Klla0A	806734
KLLA0A09251g	YHR178W	XP_003957521.1	XP_003676073.1	XP_001642310.1	NP_985148.2	SAKL0H01958g	XP_718131.1;XP_718400.1	XP_661287.1;XP_664793.1;XP_680896.1	NP_595318.2;NP_595321.1	8.9576	25.6978	12.2835	36.4807	15.3405	42.8687	-1.48427	Y	down	No	Yes	20.5168	25.2714	30.5398	34.5393	37.0145	45.0696	-0.291568	N	down	20.8999	23.1042	29.5636	34.5393	37.09	41.3712	-0.164357	N	down	25.7445	25.315	38.6416	34.5393	45.743	45.2363	0.00532439	N	up	Klla0A	808253
KLLA0A09295g	YHR181W	XP_003955597.1	XP_003676071.1	XP_001643887.1	NP_985674.2	SAKL0H01892g	XP_713027.1;XP_713059.1	XP_663392.1	NP_588034.1	240.028	244.407	68.0953	73.3265	86.007	86.1639	-0.00245104	N	down	No	No	220.605	252.337	89.5582	94.716	108.52	123.727	-0.184452	N	down	226.379	230.682	87.1851	94.716	109.387	113.572	-0.0516723	N	down	187.723	252.702	78.5618	94.716	93.0118	124.185	-0.413472	N	down	Klla0A	810967
KLLA0A09317g	YHR182W	XP_003955596.1	XP_003677041.1;XP_003677041.1;XP_003677041.1;XP_003677041.1	NA	NP_985675.2	SAKL0H01870g	XP_712493.1;XP_712523.1	XP_681993.1	NA	12.6517	8.28039	16.1589	11.1897	20.733	13.1484	0.658261	N	up	No	No	7.07611	8.49898	9.66616	10.9833	11.7218	14.3519	-0.292093	N	down	8.57126	7.76942	11.6945	10.9833	14.6873	13.1738	0.167809	N	up	7.54325	8.51043	10.7522	10.9833	12.7359	14.4049	-0.154029	N	down	Klla0A	811860
KLLA0A09339g	YGR256W;YHR183W	XP_003955595.1;XP_003955881.1	XP_003677042.1	XP_001643889.1	NP_985676.2	SAKL0H01848g	XP_722227.1;XP_722341.1	XP_661558.1	NP_595095.1	3435.67	2857.84	3693.99	3321.45	4683.66	3903.05	0.26304	N	up	No	No	2417.26	2421.69	2513.13	2317.94	3045.8	3026.4	0.0092295	N	up	2491.43	2213.94	2476.66	2317.94	3109.73	2778.02	0.1627	N	up	2215.69	2425.54	2351.52	2317.94	2784.46	3037.58	-0.125521	N	down	Klla0A	814960
KLLA0A09361g	YHR184W	XP_003955594.1	XP_003677043.1	XP_001642407.1	NP_985677.1	SAKL0H01826g	NA	NA	NA	20.2896	3.78098	20.9905	4.2805	26.551	5.03087	2.39975	Y	up	Yes	No	22.2578	3.23313	27.1397	4.2682	32.9211	5.57548	2.55805	Y	up	2.83702	2.95571	3.62776	4.2682	4.55028	5.11784	-0.155113	N	down	42.9298	3.23802	52.6599	4.2682	62.3579	5.59608	3.49193	Y	up	Klla0A	816911
KLLA0A09383g	YGR257C	XP_003955882.1	NA	XP_001643890.1	NP_985678.2	SAKL0H01804g	XP_715852.1;XP_715902.1	XP_663691.1	NP_595818.1	48.2213	41.0879	30.7298	27.7305	38.9558	32.5841	0.258527	N	up	No	No	45.5629	50.4901	33.5608	34.0535	40.6611	44.4671	-0.120267	N	down	43.9499	46.1588	30.6037	34.0535	38.3961	40.8175	-0.0870294	N	down	49.2672	50.5711	36.9602	34.0535	43.7643	44.6315	-0.025793	N	down	Klla0A	818752
KLLA0A09405g	YHR185C	XP_003955593.1	NA	XP_001643891.1	NP_985679.1	SAKL0H01782g	XP_720197.1;XP_720427.1	NA	NA	101.601	1.07364	48.7672	0.547553	61.8564	0.643732	6.57987	Y	up	Yes	No	140.778	4.7328	73.1479	2.30731	88.663	3.01132	4.86068	Y	up	1.69994	4.32687	0.89578	2.30731	1.12264	2.7642	-1.30043	Y	down	128.084	4.74072	68.4993	2.30731	81.0902	3.02245	4.72726	Y	up	Klla0A	820161
KLLA0A09427g	YGR258C	XP_003955883.1	XP_003676821.1	XP_001642408.1	NP_985680.1	SAKL0H01760g	XP_709963.1;XP_713000.1	XP_662820.1;XP_662820.1;XP_662820.1;XP_662820.1	NP_596095.1;NP_596095.1;NP_596095.1;NP_596095.1	28.7635	19.7751	62.4154	43.7299	78.5265	51.381	0.611687	N	up	No	No	23.3894	17.5059	51.6593	35.4475	62.6335	46.2787	0.429638	N	up	15.7692	16.0042	32.9757	35.4475	41.3411	42.4806	-0.0384428	N	down	31.9664	17.5341	71.8609	35.4475	85.0714	46.4498	0.870728	N	up	Klla0A	821244
KLLA0A09449g	YGR260W	XP_003956979.1	XP_003676824.1	XP_001643892.1	NP_984426.1	SAKL0H01650g	XP_717857.1;XP_717923.1;XP_720640.1;XP_720768.1	XP_657979.1;XP_658597.1;XP_658714.1;XP_659285.1;XP_659782.1;XP_659886.1;XP_659948.1;XP_660825.1;XP_663254.1;XP_680917.1;XP_682014.1;XP_682224.1;XP_682279.1	NP_592813.1	1010.6	223.377	843.3	198.295	1069.97	232.999	2.19918	Y	up	Yes	No	970.673	233.195	1025.62	224.48	1243.21	293.18	2.08467	Y	up	219.188	213.185	218.774	224.48	274.511	269.116	0.0291533	N	up	1115.83	233.546	1205.12	224.48	1426.77	294.263	2.27827	Y	up	Klla0A	825574
KLLA0A09471g	YHR186C	XP_003955592.1	XP_003677044.1	XP_001644354.1	NP_984427.2	SAKL0H01628g	XP_715853.1;XP_715903.1	XP_662243.1;XP_662243.1;XP_662243.1;XP_662243.1	NP_593370.1	16.2738	19.1572	44.1145	52.7213	55.3609	61.9507	-0.16277	N	down	No	No	16.3754	19.5152	55.0425	60.7118	66.7254	79.2373	-0.254593	N	down	19.1248	17.8416	61.6872	60.7118	77.4307	72.7348	0.0863248	N	up	13.953	19.5486	48.1517	60.7118	56.9931	79.5303	-0.486297	N	down	Klla0A	827264
KLLA0A09493g	YHR187W	XP_003955591.1	XP_003677064.1	XP_001644355.1	NP_984428.1	SAKL0H01606g	XP_720199.1;XP_720429.1	XP_664208.1	NP_595851.1	29.1155	30.1044	15.6649	16.8596	19.7244	19.8042	-0.00596136	N	down	No	No	57.2824	47.9601	32.5331	25.2142	39.4093	32.8788	0.2544	N	up	29.7429	43.849	16.0442	25.2142	20.1162	30.1812	-0.594981	N	down	61.1887	48.0513	35.204	25.2142	41.6771	33.0005	0.318142	N	up	Klla0A	832430
KLLA0A09515g	YHR188C	XP_003955590.1	XP_003677063.1	XP_001643893.1	NP_984429.2	SAKL0H01584g	XP_720200.1;XP_720430.1	XP_659379.1	NP_596625.1	54.2909	63.8267	69.8718	86.5238	88.3028	101.67	-0.203095	N	down	No	No	63.0995	76.0933	86.4769	97.0119	104.806	126.62	-0.274385	N	down	72.546	69.5667	95.0324	97.0119	119.244	116.229	0.0349126	N	up	64.0803	76.2203	89.246	97.0119	105.665	127.089	-0.268866	N	down	Klla0A	833455
KLLA0A09537g	YMR288W	XP_003955589.1	XP_003677062.1	XP_001643894.1	NP_984430.2	SAKL0H01562g	XP_720198.1;XP_720428.1	XP_660024.1	NP_594538.2	18.9907	17.4213	33.9563	32.3198	42.8299	37.977	0.173595	N	up	No	No	17.9852	20.2267	37.6201	38.7537	45.6529	50.5908	-0.164971	N	down	15.9769	18.4916	31.8111	38.7537	39.8841	46.4389	-0.219631	N	down	19.2154	20.2595	41.1352	38.7537	48.6956	50.7778	-0.06444	N	down	Klla0A	835653
KLLA0A09559g	YGR261C	XP_003956978.1	XP_003676825.1	XP_001643895.1	NP_984431.2	SAKL0H01540g	XP_709962.1;XP_712999.1	XP_657769.1	NP_593796.1	35.3497	47.8609	49.0651	69.1949	62.1368	81.3141	-0.387436	N	down	No	No	39.8762	53.1736	68.2496	84.0028	82.7678	109.692	-0.412096	N	down	45.3086	48.6115	74.3012	84.0028	93.2153	100.689	-0.110519	N	down	44.319	53.2561	77.1387	84.0028	91.3101	110.098	-0.269642	N	down	Klla0A	838592
KLLA0A09603g	YMR289W	XP_003955588.1	XP_003677061.1	XP_001643896.1	NP_986996.1	SAKL0H01496g	XP_715312.1;XP_715377.1	XP_680957.1	NP_595968.1	44.2082	29.8127	32.6425	23.4495	41.3838	27.5486	0.58766	N	up	No	No	41.6552	50.356	33.8562	37.1708	41.0271	48.5494	-0.234646	N	down	45.2798	46.0349	34.9667	37.1708	43.8721	44.5645	-0.0186776	N	down	38.2892	50.4307	31.3648	37.1708	37.1345	48.7288	-0.385758	N	down	Klla0A	841883
KLLA0A09625g	YGR262C	XP_003956977.1	XP_003676826.1	XP_001643897.1	NP_986997.1	SAKL0H01474g	XP_720561.1;XP_720688.1	XP_660117.1	NP_593411.1	63.9704	89.2606	24.2758	34.4399	30.3911	40.4716	-0.414268	N	down	No	No	96.9465	86.7759	45.3787	37.7556	54.9983	49.2665	0.151574	N	up	71.3496	79.3347	32.2243	37.7556	40.4019	45.2237	-0.166765	N	down	95.8326	86.9282	45.7615	37.7556	54.19	49.4487	0.124657	N	up	Klla0A	843147
KLLA0A09647g	YGR264C	XP_003955587.1	XP_003677060.1	XP_001643899.1	NP_986998.1	SAKL0H01452g	XP_721864.1;XP_722024.1	XP_658984.1	NP_595586.1	213.617	204.089	310.025	314.167	392.224	369.144	0.0875606	N	up	No	No	178.241	211.846	296.288	323.339	359.084	422.249	-0.233334	N	down	206.157	193.669	327.277	323.339	410.713	387.593	0.0837487	N	up	190.383	212.17	321.642	323.339	380.78	423.809	-0.154146	N	down	Klla0A	844245
KLLA0A09669g	YMR290C	XP_003955586.1	XP_003677059.1	XP_001644357.1	NP_986999.2	SAKL0H01430g	XP_721871.1;XP_722031.1	XP_659553.1	NP_594488.1	76.1626	140.872	74.619	144.228	94.2716	169.446	-0.845689	N	down	No	No	144.629	151.264	149.286	143.852	180.918	187.694	-0.0547404	N	down	86.9151	138.294	85.7327	143.852	107.501	172.292	-0.681792	N	down	199.881	151.533	209.09	143.852	247.54	188.388	0.391164	N	up	Klla0A	847036
KLLA0A09691g	YGR266W	XP_003956975.1	XP_003676828.1	XP_001644358.1	NA	SAKL0H01386g	XP_721892.1;XP_722053.1	XP_661186.1;XP_868848.1	NA	45.1958	43.7431	60.8932	61.814	76.6331	72.6336	0.0771917	N	up	No	No	68.0062	65.2012	101.288	89.8221	122.779	117.262	0.0642626	N	up	60.3884	59.6083	86.0718	89.8221	107.975	107.639	0.00383328	N	up	54.4081	65.3076	82.8511	89.8221	98.0512	117.696	-0.26549	N	down	Klla0A	849221
KLLA0A09713g	YMR291W	XP_003955585.1	XP_003677058.1	XP_001643900.1;XP_001644359.1	NP_987000.1	SAKL0H01364g	XP_722977.1;XP_723124.1	XP_660669.1	NA	270.557	226.293	254.302	222.917	321.027	261.929	0.29355	N	up	No	No	223.838	261.715	262.753	283.302	318.591	369.763	-0.216565	N	down	233.16	239.268	263.751	283.302	330.742	339.419	-0.037707	N	down	130.051	262.156	156.7	283.302	185.522	371.131	-1.00114	Y	down	Klla0A	851952
KLLA0A09735g	YGR267C	XP_003956974.1	XP_003676829.1	XP_001643901.1	NP_987001.1	SAKL0H01342g	XP_721866.1;XP_722026.1	XP_681457.1	NP_593481.1	279.715	352.393	110.503	145.637	139.665	171.133	-0.292965	N	down	No	No	342.766	400.974	160.173	172.091	194.145	224.663	-0.21138	N	down	347.226	366.578	154.745	172.091	194.157	206.225	-0.0874207	N	down	428.88	401.622	203.593	172.091	241.03	225.494	0.0954646	N	up	Klla0A	854163
KLLA0A09757g	YGR268C	XP_003956973.1	XP_003676830.1	XP_001644360.1	NP_987002.1	SAKL0H01320g	XP_721882.1;XP_722043.1	NA	NP_593478.1	14.1385	14.6067	4.49754	5.03219	5.71431	5.91478	-0.0451469	N	down	No	No	26.8061	27.0038	8.8512	8.12689	10.7199	10.6158	0.049648	N	up	20.0488	24.6862	6.57254	8.12689	8.23406	9.74442	-0.2271	N	down	21.625	27.0421	7.26287	8.12689	8.59593	10.655	-0.300894	N	down	Klla0A	855406
KLLA0A09779g	NA	NA	NA	NA	NA	NA	NA	NA	NA	79.2777	16.6378	15.1505	3.25261	19.1769	3.81969	2.32509	Y	up	Yes	No	82.1233	18.3624	18.0795	3.62965	21.9299	4.74085	2.19964	Y	up	17.7735	16.7864	3.63822	3.62965	4.55446	4.35173	0.085858	N	up	87.9147	18.3884	19.5923	3.62965	23.1948	4.75837	2.29524	Y	up	Klla0A	856553
KLLA0A09801g	YMR292W	XP_003959165.1	XP_003677056.1	XP_001643902.1	NP_987003.1	SAKL0H01298g	XP_721881.1;XP_722042.1	NA	NP_588088.1	133.014	136.645	45.969	52.301	58.5449	61.4492	-0.0691244	N	down	No	No	188.061	181.153	72.1927	63.4527	87.491	82.813	0.0764346	N	up	137.323	165.618	51.2922	63.4527	64.3172	76.0171	-0.242951	N	down	167.125	181.464	64.3187	63.4527	76.1528	83.1192	-0.130636	N	down	Klla0A	857479
KLLA0A09823g	YGR270W	XP_003956972.1	XP_003676831.1	NA	NA	SAKL0H01276g	XP_721858.1;XP_722018.1	XP_659044.1	NP_594020.1;NP_595602.1	22.3277	30.4931	64.7056	91.2837	81.1591	107.263	-0.402656	N	down	No	No	31.4358	35.5095	91.529	95.4566	110.932	124.583	-0.16966	N	down	32.8443	32.4641	91.5519	95.4566	114.92	114.359	0.0043471	N	up	33.3015	35.5698	98.9868	95.4566	117.17	125.043	-0.0973085	N	down	Klla0A	858458
KLLA0A09845g	YMR293C	XP_003959164.1	XP_003677055.1	XP_001643903.1	NP_983087.2	SAKL0H01254g	XP_721865.1;XP_722025.1	XP_682669.1	NP_595361.1	34.7528	33.3845	29.2105	29.4686	36.8191	34.6202	0.0887489	N	up	No	No	50.7173	47.338	48.0817	41.3498	58.277	53.9861	0.109018	N	up	36.3224	43.277	33.2094	41.3498	41.6824	49.5555	-0.25143	N	down	50.9381	47.4134	49.5573	41.3498	58.6664	54.1857	0.112912	N	up	Klla0A	862467
KLLA0A09867g	YMR294W	XP_003959163.1	XP_003677054.1	NA	NP_983088.2	SAKL0H01232g	XP_721885.1;XP_722046.1	XP_661193.1	NP_588199.1	19.3914	19.6063	13.7773	14.3501	17.4251	16.864	0.0481227	N	up	No	No	23.0006	24.1214	16.7792	16.4544	20.3332	21.4877	-0.0708075	N	down	22.0776	22.0518	15.3071	16.4544	19.2001	19.7241	-0.0349744	N	down	22.6409	24.1582	16.8896	16.4544	19.9968	21.5671	-0.104436	N	down	Klla0A	864111
KLLA0A09889g	YGR271W	XP_003956971.1	XP_003676832.1	XP_001646657.1	NP_983089.2	SAKL0H01210g	XP_721889.1;XP_722050.1	XP_660086.1	NP_596560.1	10.8667	10.2265	38.368	37.3764	48.3895	43.9149	0.140163	N	up	No	No	11.2479	13.5309	49.6519	54.8459	60.1858	71.625	-0.250847	N	down	10.7499	12.3699	45.4729	54.8459	57.0511	65.7464	-0.202885	N	down	9.78638	13.5515	44.2645	54.8459	52.3938	71.8898	-0.455116	N	down	Klla0A	865422
KLLA0A09911g	YGR271C-A	XP_003956970.1	XP_003676833.1	XP_001644362.1	NP_983090.3	SAKL0H01188g	XP_721887.1;XP_722048.1	XP_662138.1	NP_592896.1	33.6987	81.3755	12.8004	31.9624	16.0833	37.5496	-1.22383	Y	down	No	No	86.6077	70.8585	36.1186	26.2188	43.761	34.1756	0.345319	N	up	43.3239	64.7868	16.7766	26.2188	20.999	31.3719	-0.583158	N	down	117.3	71.0036	48.7174	26.2188	57.6673	34.3021	0.730138	N	up	Klla0A	871390
KLLA0A09933g	YMR295C	XP_003956969.1;XP_003959162.1	XP_003677053.1	XP_001646656.1	NP_983091.1	SAKL0H01166g	XP_715543.1;XP_715599.1	XP_660583.1	NP_596160.1	172.247	182.557	59.3094	68.129	75.1837	80.0487	-0.0899408	N	down	No	No	196.798	274.445	65.1268	84.7621	78.9245	110.741	-0.483185	N	down	263.896	250.891	83.4956	84.7621	104.788	101.651	0.0468648	N	up	164.197	274.839	55.8266	84.7621	66.1118	111.15	-0.744418	N	down	Klla0A	872665
KLLA0A09955g	YMR296C	XP_003956968.1	XP_003677052.1	NA	NP_983092.2	SAKL0H01144g	XP_716193.1;XP_716276.1	XP_661332.1	NP_595848.1	129.135	108.238	140.857	125.423	178.661	147.372	0.277967	N	up	No	No	114.939	156.365	137.093	171.969	166.189	224.535	-0.435106	N	down	131.873	142.951	150.594	171.969	189	206.107	-0.125248	N	down	117.443	156.612	143.915	171.969	170.388	225.365	-0.403439	N	down	Klla0A	873688
KLLA0A09977g	YMR297W;YBR139W	XP_003959166.1	XP_003677051.1	XP_001646655.1;XP_001647130.1	NP_986339.1	SAKL0H01122g	XP_711661.1;XP_711679.1;XP_718495.1;XP_718579.1	XP_663046.1	NP_594425.1	383.981	162.808	368.497	165.962	465.654	195.041	1.25552	Y	up	No	No	194.472	332.264	214.755	339.254	260.319	443.333	-0.767384	N	down	401.452	303.742	424.951	339.254	533.52	406.94	0.391476	N	up	128.75	332.71	145.556	339.254	172.299	444.97	-1.36759	Y	down	Klla0A	876594
KLLA0A09999g	YMR298W	XP_003959167.1	XP_003676834.1;XP_003677050.1	XP_001646654.1	NP_986338.1	SAKL0H01100g	NA	NA	NA	317.661	443.437	58.5072	87.4167	73.6986	102.716	-0.479013	N	down	No	No	385.211	420.885	79.7137	82.3284	96.6088	107.52	-0.152129	N	down	452.189	384.771	89.766	82.3284	112.608	98.6947	0.191847	N	up	425.733	421.523	91.5613	82.3284	108.403	107.917	0.00852578	N	up	Klla0A	878563
KLLA0A10021g	YGR274C	XP_003959168.1	XP_003677049.1	XP_001644363.1	NP_986337.1	SAKL0H01078g	XP_710090.1;XP_710100.1;XP_718700.1;XP_718784.1	XP_661511.1	NP_593094.1	17.4938	23.4664	36.6626	49.9966	46.0215	58.7506	-0.352834	N	down	No	No	20.7117	21.4566	47.4579	44.8101	57.534	58.449	-0.0347966	N	down	19.4306	19.6172	42.3914	44.8101	53.145	53.6531	-0.0192397	N	down	21.9464	21.4966	51.035	44.8101	60.4001	58.6652	0.0311404	N	up	Klla0A	879152
KLLA0A10043g	YGR275W	XP_003956774.1	XP_003676836.1	XP_001646653.1	NP_986336.1	SAKL0H01056g	NA	NA	NA	125.467	142.767	27.2619	32.6767	34.2798	38.3958	-0.164025	N	down	No	No	183.649	167.817	41.4123	34.3692	50.1969	44.8783	0.160782	N	up	143.119	153.417	30.7405	34.3692	38.5415	41.195	-0.0935239	N	down	166.821	168.07	38.2233	34.3692	45.2506	45.0442	0.00738208	N	up	Klla0A	882810
KLLA0A10065g	YGR276C	XP_003956775.1	XP_003676837.1	XP_001644364.1	NP_986335.2	SAKL0H01034g	XP_718702.1;XP_718786.1	XP_680835.1	NP_594627.2	46.5394	107.11	60.5166	142.879	76.0004	167.886	-1.14374	Y	down	No	No	82.9922	93.7074	120.363	124.683	145.884	162.739	-0.159418	N	down	73.8362	85.6701	102.335	124.683	128.318	149.384	-0.219955	N	down	106.122	93.8637	157.164	124.683	186.077	163.341	0.186184	N	up	Klla0A	883467
KLLA0A10087g	YMR299C	XP_003959169.1	XP_003676220.1	NA	NP_986334.1	SAKL0H01012g	NA	NA	NA	7.3533	12.6371	4.65973	8.40872	5.8257	9.87985	-0.765438	N	down	No	No	11.132	9.92653	8.20368	6.72364	9.94487	8.77046	0.149364	N	up	7.4948	9.0756	5.37563	6.72364	6.75016	8.05082	-0.280512	N	down	8.76815	9.94524	6.75116	6.72364	7.99036	8.80291	-0.172021	N	down	Klla0A	885994
KLLA0A10109g	YMR300C	XP_003959170.1	XP_003676186.1	XP_001646652.1	NP_986333.1	SAKL0H00990g	XP_716486.1;XP_716541.1	XP_664241.1	NP_594961.1	212.961	238.731	214.474	254.314	269.312	298.794	-0.149957	N	down	No	No	220.785	314.214	232.325	306.08	281.668	399.721	-0.50563	N	down	257.64	287.254	260.624	306.08	326.968	366.913	-0.165954	N	down	312.762	314.695	336.928	306.08	398.918	401.198	-0.00778147	N	down	Klla0A	887498
KLLA0A10131g	YMR301C	XP_003959172.1	XP_003676185.1	XP_001644365.1	NP_986332.1	SAKL0H00968g	XP_712065.1;XP_712090.1	XP_663132.1	NP_594288.2	25.4574	39.1491	35.3286	57.0009	44.6761	66.9842	-0.583859	N	down	No	No	34.5365	44.9365	54.4414	64.7235	66.0034	84.4808	-0.363242	N	down	45.0769	41.0823	66.812	64.7235	83.8502	77.5479	0.109734	N	up	38.5326	45.0115	61.1717	64.7235	72.4218	84.7932	-0.231179	N	down	Klla0A	889688
KLLA0A10153g	YMR314W	XP_003959186.1	XP_003676173.1	XP_001645207.1	NP_986331.1	SAKL0H00946g	XP_715227.1	XP_664151.1	NP_594101.1	285.204	265.725	121.253	120.154	153.353	141.183	0.11943	N	up	No	No	374.837	364.232	161.25	142.951	195.521	186.652	0.0650877	N	up	356.051	332.984	149.232	142.951	187.223	171.333	0.128039	N	up	352.147	364.805	153.734	142.951	181.972	187.342	-0.0422099	N	down	Klla0A	892398
KLLA0A10175g	YMR313C	XP_003959185.1	XP_003676174.1	XP_001644374.1	NP_986330.1	SAKL0H00902g	XP_722764.1;XP_722910.1	NA	NP_588315.2	20.8178	26.7044	21.9695	28.8707	27.6578	33.9202	-0.294844	N	down	No	No	20.2718	27.1046	24.8304	30.8696	30.096	40.3223	-0.416631	N	down	26.7125	24.7787	31.4577	30.8696	39.502	37.0127	0.0964838	N	up	17.0065	27.1445	21.7068	30.8696	25.694	40.4713	-0.649244	N	down	Klla0A	893626
KLLA0A10197g	YMR312W	XP_003959184.1	XP_003676175.1	XP_001645208.1	NP_986329.1	SAKL0H00880g	XP_722766.1;XP_722912.1	XP_662390.1	NP_595765.1	60.6461	114.644	23.3658	46.6377	29.6042	54.7951	-0.887249	N	down	No	No	98.0808	92.0586	47.6314	40.7769	57.7151	53.2033	0.113154	N	up	66.9326	84.1652	30.7234	40.7769	38.5521	48.8375	-0.348405	N	down	111.542	92.2237	54.8556	40.7769	64.9409	53.4	0.272218	N	up	Klla0A	895418
KLLA0A10219g	YHR206W	XP_003956132.1	XP_003673586.1	XP_001642385.1	NP_983708.1	SAKL0B12408g	XP_716809.1;XP_716809.1;XP_716809.1;XP_716809.1;XP_716869.1;XP_716869.1;XP_716869.1;XP_716869.1	XP_661292.1;XP_661292.1;XP_661292.1;XP_661292.1	NP_594284.1;NP_594284.1;NP_594284.1;NP_594284.1	48.2813	60.4945	42.4922	55.2543	53.4148	64.9166	-0.281669	N	down	No	No	55.7463	55.4526	55.6656	51.3489	67.4765	67.0327	0.00524752	N	up	51.6119	50.6958	49.4588	51.3489	62.0936	61.5315	0.0101877	N	up	55.6034	55.5424	56.8792	51.3489	67.3258	67.2806	-0.00256382	N	down	Klla0A	896931
KLLA0A10241g	YHR207C	XP_003956133.1	XP_003673587.1	XP_001643559.1	NP_983709.2	SAKL0B12430g	XP_715678.1;XP_715734.1	XP_660161.1;XP_663602.1;XP_664433.1;XP_680493.1	NP_588413.1;NP_596514.1	27.7141	25.7487	24.8043	24.7314	31.4676	29.0594	0.115844	N	up	No	No	35.908	44.3833	36.8817	42.3159	44.7285	55.2294	-0.318809	N	down	40.9065	40.5766	40.7261	42.3159	51.1178	50.6971	0.00692709	N	up	36.8253	44.4577	39.2121	42.3159	46.4091	55.4336	-0.263518	N	down	Klla0A	898752
KLLA0A10263g	YER182W	XP_003956134.1	XP_003673588.1	XP_001643558.1	NP_983710.1	SAKL0B12452g	XP_721872.1;XP_722032.1	XP_658800.1	NA	54.0003	53.5011	24.6375	26.2324	31.1369	30.8238	0.0151575	N	up	No	No	75.0608	76.6825	35.3523	33.5104	42.8722	43.7726	-0.0347987	N	down	67.138	70.1016	30.466	33.5104	38.2363	40.1797	-0.0671573	N	down	57.7848	76.7929	27.8107	33.5104	32.9207	43.9343	-0.40971	N	down	Klla0A	900517
KLLA0A10285g	YER183C	XP_003956135.1	XP_003675240.1	XP_001642386.1	NP_983711.1	SAKL0B12474g	XP_712854.1;XP_712948.1	XP_681300.1	NP_596203.1	116.418	128.938	65.4763	79.1309	83.0215	92.9723	-0.162873	N	down	No	No	218.697	252.963	117.703	125.726	142.672	164.153	-0.203199	N	down	218.408	231.262	113.429	125.726	142.273	150.681	-0.0826738	N	down	214.332	253.367	118.14	125.726	139.873	164.759	-0.236395	N	down	Klla0A	901341
KLLA0A10307g	YJR148W;YHR208W	XP_003956136.1;XP_003957733.1;XP_003958921.1	XP_003678540.1	XP_001642387.1;XP_001643557.1	NP_983712.1	SAKL0B12496g	XP_714700.1;XP_720921.1	XP_661927.1;XP_681147.1	NP_595180.2	858.106	1889.31	771.094	1825.57	977.93	2144.98	-1.13312	Y	down	No	No	965.609	1624.99	792.709	1222.94	960.911	1597.95	-0.733586	N	down	2326.89	1485.51	1817.63	1222.94	2282	1466.78	0.637826	N	up	1013.33	1627.21	847.408	1222.94	1003.4	1603.85	-0.676285	N	down	Klla0A	902374
KLLA0A10329g	NA	XP_003955295.1	XP_003677109.1	XP_001642773.1	NA	SAKL0B12518g	XP_723005.1;XP_723152.1	XP_657977.1	NP_588520.1;XP_004001692.1	22.3641	13.7934	25.03	16.0999	31.4183	18.9166	0.731093	N	up	No	No	23.3873	22.6044	31.9265	29.1354	38.7059	38.065	0.0275909	N	up	20.2001	20.6643	27.0301	29.1354	33.9337	34.9404	-0.0363386	N	down	16.8685	22.6363	23.85	29.1354	28.234	38.2056	-0.425436	N	down	Klla0A	903873
KLLA0A10351g	NA	NA	NA	XP_001642406.1	NA	NA	NA	NA	NA	76.2273	58.2402	26.9247	21.9274	34.018	25.7619	0.40138	N	up	No	No	73.4651	83.9237	28.9788	30.7657	35.131	40.1882	-0.192544	N	down	78.5916	76.7215	30.1345	30.7657	37.8	36.8895	0.0414242	N	up	71.9484	84.0454	29.4255	30.7657	34.8408	40.3367	-0.202293	N	down	Klla0A	906401
KLLA0A10373g	YGL254W	XP_003959497.1	XP_003676448.1	XP_001643481.1	NA	SAKL0B12672g;SAKL0F00242g	NA	XP_660352.1	NP_594670.1	39.4643	32.3279	13.6127	11.7685	17.1934	13.8288	0.314706	N	up	No	No	46.6252	47.846	15.9643	14.7851	19.3313	19.3056	0.0260421	N	up	40.6997	43.7409	13.2515	14.7851	16.6154	17.7211	-0.0897204	N	down	51.2327	47.9195	17.6947	14.7851	20.939	19.3769	0.108527	N	up	Klla0A	907244
KLLA0A10395g	YNR064C	NA	NA	NA	NA	NA	XP_719692.1;XP_719809.1	XP_658392.1;XP_662787.1	NA	38.0342	13.5445	19.4234	7.32709	24.7027	8.6116	1.52153	Y	up	No	No	27.9745	18.647	15.5028	9.571	18.7875	12.5072	0.610651	N	up	13.562	17.0462	7.05035	9.571	8.84399	11.4805	-0.357316	N	down	27.7734	18.6715	15.8151	9.571	18.7215	12.5534	0.598918	N	up	Klla0A	908097
KLLA0A10417g	YIL162W	NA	NA	XP_001642290.1;XP_001643480.1	NP_986076.1	SAKL0B00220g;SAKL0D11946g;SAKL0F01122g	NA	XP_662616.1	NP_588300.1;NP_594168.2	1432.03	1055.93	1628.81	1293.57	2073.4	1520.1	0.447849	N	up	No	No	440.163	778.477	566.633	924.495	687.461	1208.8	-0.814486	N	down	1206.26	711.624	1493.47	924.495	1874.99	1109.55	0.757272	N	up	192.468	779.4	253.233	924.495	299.89	1213.26	-2.01572	Y	down	Klla0A	910347
KLLA0A10439g	YCL073C;YHL047C;YHL040C;YKR106W	XP_003959072.1	XP_003674089.1;XP_003676177.1;XP_003678025.1	XP_001642645.1;XP_001642948.1;XP_001642949.1;XP_001644375.1	NA	SAKL0E00132g;SAKL0F00110g;SAKL0F00792g;SAKL0G03300g	XP_715962.1;XP_716020.1	XP_662982.1	NP_588192.1;NP_596109.1	169.086	100.054	194.978	126.661	248.824	148.906	0.740879	N	up	No	No	114.778	183.288	156.246	230.957	189.282	301.462	-0.669974	N	down	120.215	167.567	157.277	230.957	197.338	276.723	-0.488405	N	down	38.1326	183.593	53.0776	230.957	62.8417	302.577	-2.26808	Y	down	Klla0A	913342
KLLA0A10461g	YKL070W	NA	NA	NA	NA	SAKL0A00176g	XP_720389.1	NA	NA	56.1279	21.3268	27.342	11.3525	34.7189	13.3375	1.38067	Y	up	No	No	71.1722	51.2952	33.164	22.7957	40.2209	29.7844	0.432649	N	up	64.4243	46.893	28.778	22.7957	36.172	27.3395	0.406885	N	up	44.8341	51.3689	21.41	22.7957	25.3443	29.8944	-0.225401	N	down	Klla0A	916547
KLLA0A10483g	YDR025W;YBR048W	XP_003957408.1	XP_003673985.1;XP_003678180.1	XP_001645438.1	NP_982856.1	SAKL0D03828g	NA	XP_662826.1	NP_594003.1;NP_594672.1	1177.52	1344.3	594.641	722.274	758.24	848.732	-0.162596	N	down	No	No	1089.22	1713.41	605.216	889.88	733.502	1161.7	-0.663402	N	down	1304.38	1566.43	696.155	889.88	873.389	1066.36	-0.288075	N	down	1042.46	1716.2	598.736	889.88	708.688	1165.99	-0.718545	N	down	Klla0A	917868
KLLA0A10505g	NA	NA	NA	NA	NA	NA	NA	NA	NA	1.31482	3.93544	0.26093	0.74976	NA	NA	NA	NA	NA	No	No	0.975997	3.94029	0.277301	0.725154	NA	NA	NA	NA	NA	1.99269	3.60227	0.304927	0.725154	NA	NA	NA	NA	NA	0.800324	3.94662	0.203541	0.725154	NA	NA	NA	NA	NA	Klla0A	918705
KLLA0A10527g	YBR047W	XP_003956187.1	XP_003678181.1	NA	NA	SAKL0D03850g	NA	NA	NA	133.707	119.192	41.0086	37.0449	51.384	43.5635	0.238171	N	up	No	No	122.506	93.8999	39.3847	27.5933	47.742	36.0697	0.416336	N	up	99.0662	85.8365	30.4062	27.5933	38.139	33.1086	0.216701	N	up	136.698	94.0131	43.9624	27.5933	52.0436	36.2029	0.540538	N	up	Klla0A	919456
KLLA0A10549g	YBR046C	XP_003956188.1	XP_003678183.1	NA	NP_982857.1	SAKL0D03872g	XP_714790.1;XP_714852.1	XP_657762.1	NP_588330.1	250.683	141.776	176.614	107.927	223.207	126.821	0.815684	N	up	No	No	175.823	152.47	122.275	98.5041	148.223	128.633	0.204164	N	up	136.101	139.389	91.7238	98.5041	115.136	118.076	-0.0362455	N	down	147.163	152.707	105.009	98.5041	124.355	129.109	-0.0527546	N	down	Klla0A	921022
KLLA0A10571g	YBR045C	XP_003956189.1	XP_003678184.1	XP_001645322.1	NP_982858.2	SAKL0D03883g	NA	NA	NA	36.3227	1.24584	41.6825	1.63736	52.4709	1.92365	4.76501	Y	up	Yes	No	66.6692	3.33379	79.5413	3.93806	96.3733	5.1399	4.21813	Y	up	2.18994	3.04782	2.79278	3.93806	3.50083	4.7181	-0.435573	N	down	177.968	3.33925	216.563	3.93806	256.414	5.15891	5.6211	Y	up	Klla0A	922516
KLLA0A10593g	YDR023W	XP_003957406.1	XP_003673984.1	XP_001645321.1	NP_982859.1	SAKL0D03894g	XP_719967.1;XP_720099.1	XP_682136.1	NP_594867.1	291.835	399.687	265.795	388.009	335.38	455.922	-0.442973	N	down	No	No	337.52	392.645	316.555	341.201	383.711	445.562	-0.215648	N	down	444.911	358.957	399.813	341.201	501.816	408.992	0.295154	N	up	348.904	393.252	334.971	341.201	396.59	447.209	-0.173009	N	down	Klla0A	924496
KLLA0A10637g	YDR022C	NA	XP_003673983.1	XP_001647118.1	NP_985264.1	SAKL0D03938g	NA	XP_661005.1	NA	33.5195	29.4772	5.60645	5.2925	7.05087	6.21942	0.179856	N	up	No	No	42.3712	36.2791	8.47606	6.26088	10.2707	8.18634	0.371784	N	up	41.0926	33.163	7.51011	6.26088	9.4118	7.51424	0.359796	N	up	40.3545	36.3197	7.87357	6.26088	9.31947	8.21657	0.220948	N	up	Klla0A	926574
KLLA0A10659g	YDR021W	XP_003957405.1	XP_003673982.1	XP_001647119.1	NP_985263.2	SAKL0D03960g	XP_718147.1;XP_718416.1;XP_718509.1;XP_718592.1	XP_660536.1;XP_681285.1	NP_592863.1;NP_594854.1	11.4752	32.4394	8.76155	24.9888	10.9145	29.356	-1.42968	Y	down	No	No	34.5866	25.0844	27.9525	18.658	33.863	24.3359	0.468616	N	up	18.3743	22.9339	14.1102	18.658	17.7162	22.3391	-0.350053	N	down	42.5311	25.1309	35.255	18.658	41.7397	24.4259	0.751932	N	up	Klla0A	927059
KLLA0A10681g	YOL018C	XP_003959114.1	XP_003673829.1	XP_001642445.1	NP_984835.2	SAKL0D10032g	XP_722442.1;XP_722582.1	XP_659652.1	NP_593832.1	30.009	45.9474	20.8214	31.0398	26.1955	36.4689	-0.477908	N	down	No	No	46.5555	53.1544	34.4687	36.4431	41.7691	47.576	-0.186065	N	down	45.1511	48.595	32.3687	36.4431	40.5853	43.6715	-0.105733	N	down	45.4701	53.2417	34.5644	36.4431	40.9099	47.7519	-0.227614	N	down	Klla0A	928563
KLLA0A10703g	YOL019W	XP_003959113.1	XP_003673830.1	XP_001642444.1	NP_984834.2	SAKL0D10054g	XP_722417.1;XP_722556.1	XP_662457.1	NP_588418.1;NP_593706.1	58.4523	74.3941	63.445	84.463	79.6573	99.2599	-0.317642	N	down	No	No	62.1543	80.201	80.885	96.3415	98.0364	125.865	-0.357428	N	down	73.5471	73.3176	91.3809	96.3415	114.681	115.534	-0.0081093	N	down	76.0615	80.3144	101.141	96.3415	119.712	126.33	-0.0744515	N	down	Klla0A	929877
KLLA0A10769g	YFR011C	XP_003956577.1	XP_003676006.1	XP_001642793.1	NP_984833.2	SAKL0D10098g	NA	XP_681959.1	NP_596357.1	150.874	131.514	39.1454	35.8179	48.7259	42.088	0.210605	N	up	No	No	272.933	207.969	64.0369	45.3853	77.5829	59.2245	0.388074	N	up	127.975	190.137	28.7476	45.3853	36.0586	54.3645	-0.596784	N	down	172.047	208.342	40.2956	45.3853	47.7035	59.4435	-0.325494	N	down	Klla0A	933157
KLLA0A10791g	YFR010W	XP_003956578.1	XP_003676005.1	XP_001645402.1	NP_984832.2	SAKL0D10120g	XP_718923.1;XP_719025.1	XP_681968.1	NP_594117.2	92.0679	47.3931	99.7441	52.7592	125.696	61.9931	1.01967	Y	up	Yes	No	119.862	90.1974	131.53	91.2458	159.441	119.162	0.420247	N	up	83.066	82.4584	87.2259	91.2458	109.466	109.382	0.0019221	N	up	113.835	90.3356	126.803	91.2458	150.142	119.603	0.32971	N	up	Klla0A	934135
KLLA0A10813g	YOL020W	NA	XP_003673831.1	XP_001645401.1	NP_984831.3	Sklu_YGOB_Anc_1.368	XP_711412.1;XP_711447.1;XP_711464.1;XP_712311.1;XP_712455.1;XP_713900.1;XP_714102.1;XP_714611.1;XP_714743.1;XP_720611.1;XP_720739.1	XP_659263.1;XP_663282.1	NP_594316.1;NP_595000.1;NP_595008.3;NP_595051.2;NP_595053.1;NP_596348.1;NP_596769.2;NP_596849.1	145.978	186.898	139.714	191.491	176.929	224.996	-0.346543	N	down	No	No	101.316	145.009	125.069	166.475	151.651	217.444	-0.52114	N	down	173.783	132.566	207.519	166.475	260.652	199.597	0.385347	N	up	109.933	145.225	139.142	166.475	164.723	218.248	-0.404534	N	down	Klla0A	936126
KLLA0A10835g	YOL021C	XP_003956579.1	XP_003676004.1	XP_001645710.1	NP_984830.1	SAKL0D10186g	XP_716298.1;XP_716360.1	XP_661261.1	NP_596653.1	39.9007	54.9465	77.8783	110.818	97.9918	130.2	-0.410027	N	down	No	No	56.9691	61.5555	126.401	125.476	153.191	163.701	-0.098296	N	down	44.6394	56.2776	94.8083	125.476	118.854	150.268	-0.33987	N	down	66.4685	61.6663	150.616	125.476	178.283	164.307	0.114159	N	up	Klla0A	938712
KLLA0A10857g	YFR009W	XP_003956580.1	XP_003676003.1	XP_001645711.1	NP_984829.1	SAKL0D10208g	XP_718920.1;XP_719022.1	XP_661919.1	NP_595837.1	39.7799	50.0407	59.665	77.5118	74.7037	91.0747	-0.286408	N	down	No	No	56.31	55.751	90.7966	82.8408	110.046	108.115	0.0226265	N	up	45.4458	50.9697	70.3163	82.8408	88.2255	99.2427	-0.172399	N	down	64.8969	55.8462	106.919	82.8408	126.596	108.515	0.218976	N	up	Klla0A	941784
KLLA0A10901g	YOL022C	XP_003956367.1	XP_003673832.1	XP_001644719.1	NP_984828.2	SAKL0D10252g	XP_716923.1;XP_716990.1	XP_660660.1	NP_596352.1	19.1798	41.8243	17.7493	39.5094	22.1671	46.4161	-1.06754	Y	down	No	No	60.9108	54.0607	53.5219	43.91	64.8563	57.2917	0.174052	N	up	33.0809	49.4255	28.285	43.91	35.4862	52.5905	-0.573729	N	down	76.3045	54.1584	68.2453	43.91	80.7968	57.5036	0.481602	N	up	Klla0A	945121
KLLA0A10923g	YOL023W	XP_003956368.1	XP_003673833.1	XP_001644718.1	NP_984827.1	SAKL0D10274g	XP_716922.1;XP_716989.1	NA	NP_595135.1	10.2637	14.1176	13.9192	19.4356	17.276	22.8392	-0.404646	N	down	No	No	42.693	17.2162	61.2174	22.7331	74.1853	29.6385	1.30638	Y	up	12.586	15.7407	17.4121	22.7331	21.8395	27.2069	-0.330112	N	down	54.6041	17.2501	79.9949	22.7331	94.7046	29.7482	1.64836	Y	up	Klla0A	946489
KLLA0A10945g	NA	NA	NA	NA	NP_984826.2	SAKL0D10296g	XP_720623.1;XP_720750.1	NA	NA	129.316	69.3524	81.7047	45.6445	103.532	53.6412	0.949035	N	up	No	No	87.5682	98.53	71.4907	73.9755	86.6676	96.6998	-0.153701	N	down	125.521	90.0704	98.8084	73.9755	124.035	88.7613	0.487614	N	up	68.3198	98.6553	57.3615	73.9755	67.9243	97.057	-0.507556	N	down	Klla0A	948881
KLLA0A10967g	YFR017C	NA	NA	XP_001644717.1	NP_984825.1	SAKL0D10318g	NA	NA	NA	75.131	47.6547	22.7678	15.6652	29.0151	18.4104	0.657615	N	up	No	No	58.7435	97.2149	16.8627	26.3224	20.4602	34.4019	-0.761378	N	down	103.562	88.8679	29.0174	26.3224	36.4458	31.5778	0.214457	N	up	43.6486	97.337	13.0923	26.3224	15.4934	34.5289	-1.14556	Y	down	Klla0A	950412
KLLA0A10989g	NA	XP_003956369.1	XP_003673834.1	XP_001644716.1	XP_002999482.1	SAKL0D10340g	NA	NA	NP_593286.1	79.7103	55.3183	83.6629	61.3543	106.061	72.0916	0.557319	N	up	No	No	61.4125	78.133	68.8581	80.9877	83.5122	105.757	-0.346866	N	down	73.9536	71.4292	80.5527	80.9877	101.132	97.077	0.0588312	N	up	41.7874	78.2529	48.5208	80.9877	57.4568	106.148	-0.883404	N	down	Klla0A	951316
KLLA0A11011g	YCR012W	XP_003957876.1;XP_003958846.1	XP_003673795.1;XP_003677557.1	XP_001647018.1	NP_984823.2	SAKL0D10384g	XP_711323.1;XP_711371.1	XP_658850.1	NP_596730.1	12307	15916.9	12355.1	17894.7	15802.1	21027.6	-0.412167	N	down	No	No	7103.52	10024.1	6051.14	7844.98	7338.8	10253.2	-0.482473	N	down	16353.4	9163.5	13317.3	7844.98	16724.4	9411.54	0.829483	N	up	7616.2	10037.1	6613.21	7844.98	7831.45	10291.1	-0.393987	N	down	Klla0A	953797
KLLA0A11033g	YCR014C	XP_003957875.1	XP_003673794.1	XP_001647019.1	NP_984822.1	NA	NA	XP_658835.1	NP_592977.1	26.9068	33.8706	24.3029	31.0123	30.4546	36.4338	-0.259782	N	down	No	No	34.5231	33.0195	34.996	30.9911	42.4465	40.4499	0.0530108	N	up	27.0129	30.1875	26.5371	30.9911	33.2863	37.1304	-0.161485	N	down	32.6466	33.075	33.7648	30.9911	39.971	40.5995	-0.030273	N	down	Klla0A	955278
KLLA0A11044g	YCR015C	XP_003958847.1	XP_003677556.1	XP_001644052.1	NP_984821.2	SAKL0D10406g	NA	NA	NP_595901.1	19.9461	33.7749	7.10647	12.7661	8.78908	15.0007	-0.774439	N	down	No	No	37.0567	35.6913	14.6612	12.802	17.786	16.6995	0.0523723	N	up	26.8142	32.6312	10.2003	12.802	12.7843	15.3293	-0.272663	N	down	32.6775	35.7558	13.2112	12.802	15.6372	16.7613	-0.12475	N	down	Klla0A	956792
KLLA0A11066g	YCR016W	XP_003958848.1	XP_003677555.1	XP_001642361.1	NP_984820.2	SAKL0D10428g	XP_719712.1;XP_719829.1	XP_662472.1	NA	17.3692	37.7652	10.0493	22.5825	12.5207	26.5316	-1.08518	Y	down	No	No	62.793	40.7776	32.6309	19.6035	39.524	25.5534	0.618116	N	up	18.1553	37.284	8.98535	19.6035	11.2583	23.4571	-1.06752	Y	down	96.0334	40.8636	51.0676	19.6035	60.4624	25.648	1.21259	Y	up	Klla0A	958239
KLLA0A11088g	NA	NA	NA	NA	NP_983129.1	SAKL0F15598g	NA	NA	NA	14.8237	7.68871	25.8845	13.7737	32.7631	16.1831	1.01797	Y	up	Yes	No	8.78974	9.06505	19.9906	19.1428	24.2467	24.9909	-0.0639791	N	down	6.65383	8.2874	14.4645	19.1428	18.1511	22.9399	-0.34093	N	down	7.63021	9.07955	17.6553	19.1428	20.8958	25.0832	-0.270106	N	down	Klla0A	959342
KLLA0A11110g	YFL040W	XP_003956486.1	XP_003676585.1	XP_001642359.1;XP_001642360.1	NP_984819.1	SAKL0D10450g	XP_712858.1;XP_712952.1;XP_713728.1;XP_713762.1	XP_660070.1;XP_664527.1;XP_682442.1;XP_682453.1	NA	498.679	45.4917	469.903	46.8201	602.394	55.0472	3.45201	Y	up	Yes	No	689.913	570.094	808.087	619.137	980.738	805.402	0.283528	N	up	214.538	521.318	244.044	619.137	305.622	739.362	-1.27479	Y	down	68.9201	571.593	82.8986	619.137	98.1445	808.389	-3.04251	Y	down	Klla0A	964084
KLLA0A11132g	YCR017C	XP_003957874.1	XP_003673792.1	XP_001642971.1	NP_984818.2	SAKL0D10494g	XP_717850.1;XP_717916.1	XP_662615.1	NP_594060.2	60.6562	74.4477	97.2284	126.124	123.84	148.216	-0.258862	N	down	No	No	45.6428	68.0129	98.8789	136.203	119.864	177.847	-0.570413	N	down	76.2076	62.1778	158.743	136.203	199.233	163.251	0.28728	N	up	48.8196	68.119	108.182	136.203	128.07	178.505	-0.478882	N	down	Klla0A	967049
KLLA0A11176g	YEL011W	XP_003958842.1	XP_003677553.1	NA	NP_984817.1	SAKL0D10538g	XP_719182.1;XP_719298.1	XP_659918.1	NP_587976.1;NP_588205.1;NP_594551.1;NP_596776.1	133.716	47.7686	163.585	61.2843	207.62	72.0231	1.52759	Y	up	No	No	54.109	101.341	85.9263	147.605	104.219	192.889	-0.890424	N	down	130.846	92.6414	199.189	147.605	250.151	177.055	0.500098	N	up	28.7005	101.476	46.5301	147.605	55.0935	193.602	-1.80934	Y	down	Klla0A	970974
KLLA0A11198g	YEL012W	XP_003958840.1	XP_003677552.1	XP_001644268.1	NP_984816.1	SAKL0D10560g	XP_712871.1;XP_712965.1	XP_659365.1	NP_596617.1	99.0075	97.7782	41.3684	42.6056	52.4778	50.0675	0.0683732	N	up	No	No	103.64	94.1604	51.675	43.6687	62.6702	57.0238	0.128369	N	up	104.772	86.0812	49.7086	43.6687	62.3715	52.3436	0.253794	N	up	90.8852	94.3037	46.5238	43.6687	55.076	57.2346	-0.0542707	N	down	Klla0A	973755
KLLA0A11209g	YCR020W-B	XP_003957872.1	XP_003673790.1	XP_001644267.1	NP_984815.1	Sklu_YGOB_Anc_1.437	NA	NA	NA	142.446	195.65	7.92303	12.1152	9.94857	14.2332	-0.518166	N	down	No	No	214.688	175.872	12.0877	9.8683	14.6493	12.8853	0.188573	N	up	168.662	160.786	9.54769	9.8683	11.9928	11.8278	0.0157491	N	up	229.511	176.161	14.119	9.8683	16.7161	12.9329	0.371158	N	up	Klla0A	974831
KLLA0A11220g	YCR020C-A	XP_003957873.1	XP_003673789.1	XP_001644266.1	NP_984814.1	SAKL0D10582g	NA	NA	NP_595273.2	77.4605	95.319	6.37229	8.56915	8.00705	10.0695	-0.331698	N	down	No	No	131.766	120.365	11.2002	9.79281	13.5676	12.7945	0.116482	N	up	87.5743	110.035	7.6241	9.79281	9.55861	11.7442	-0.280508	N	down	180.904	120.54	15.8264	9.79281	18.7353	12.8417	0.561929	N	up	Klla0A	975454
KLLA0A11242g	YCR019W	NA	XP_003673787.1	XP_001644264.1	NA	SAKL0D10626g	XP_712879.1;XP_712973.1	XP_658602.1;XP_659523.1	NP_593074.2	43.5318	42.1662	26.6307	27.0585	33.6594	31.7943	0.0828144	N	up	No	No	55.3988	41.2014	39.303	26.7216	47.6369	34.8926	0.449863	N	up	36.4978	37.6665	24.9327	26.7216	31.2939	32.0288	-0.0336715	N	down	55.6597	41.2654	40.0874	26.7216	47.4737	35.0215	0.441613	N	up	Klla0A	975786
KLLA0A11286g	YEL013W	XP_003958838.1	XP_003677564.1	XP_001644689.1	NP_984813.1	SAKL0D10736g	XP_710979.1;XP_710992.1	NA	NP_595238.1	113.269	118.562	122.016	133.688	153.668	157.098	-0.0318349	N	down	No	No	99.5839	103.337	121.495	116.771	147.282	152.433	-0.0519228	N	down	116.953	94.4733	137.637	116.771	172.837	139.923	0.303347	N	up	108.53	103.506	135.982	116.771	160.992	152.996	0.0721565	N	up	Klla0A	978095
KLLA0A11308g	YEL015W	XP_003958837.1	XP_003677565.1;XP_003677565.1	XP_001644688.1;XP_001644688.1	NP_984812.2	SAKL0D10758g	XP_712216.1;XP_712246.1	XP_664497.1;XP_664497.1	NP_595858.1	61.5514	90.0755	57.0724	87.0943	71.9034	102.327	-0.50915	N	down	No	No	90.5645	93.4357	86.0976	81.9432	104.34	106.985	-0.0354867	N	down	91.5757	85.42	82.9066	81.9432	104.035	98.2043	0.0825128	N	up	94.3129	93.584	91.4648	81.9432	108.284	107.38	0.0113234	N	up	Klla0A	980616
KLLA0A11330g	YCR027C	NA	XP_003673786.1	XP_001644687.1	NA	SAKL0D10780g	XP_723057.1;XP_723204.1	XP_682137.1	NP_595194.1	132.639	196.388	38.4774	59.3745	48.4322	69.7658	-0.526712	N	down	No	No	181.137	179.655	58.6492	53.4773	71.0953	69.8245	0.023541	N	up	154.219	164.241	47.1514	53.4773	59.1639	64.0938	-0.115671	N	down	185.176	179.933	61.1695	53.4773	72.4287	70.0826	0.0479211	N	up	Klla0A	982552
KLLA0A11352g	NA	NA	NA	NA	NA	SAKL0D10802g	XP_710493.1	XP_659281.1;XP_659781.1;XP_662295.1;XP_662621.1;XP_663152.1	NP_593247.1	591.83	101.412	330.988	60.472	416.666	71.0528	2.55182	Y	up	No	No	562.149	352.071	331.832	191.669	401.908	250.084	0.684239	N	up	206.02	321.882	116.609	191.669	146.365	229.563	-0.651017	N	down	195.515	352.696	118.25	191.669	140.003	251.009	-0.844215	N	down	Klla0A	983428
KLLA0A11374g	YCR026C;YEL016C	NA	XP_003673785.1;XP_003673785.1	XP_001644686.1	NP_984811.1	SAKL0D10824g	XP_711857.1;XP_723597.1	XP_680819.1	NP_595485.1	30.5313	27.6283	29.7176	27.7958	37.5885	32.6616	0.20327	N	up	No	No	27.3338	38.7935	35.7191	46.4923	43.288	60.7025	-0.486029	N	down	36.6502	35.4656	46.003	46.4923	57.7203	55.7206	0.0504111	N	up	27.0687	38.8554	36.2191	46.4923	42.8818	60.9269	-0.506928	N	down	Klla0A	985471
KLLA0A11396g	YEL017W	XP_003958836.1;XP_003958836.1;XP_003958836.1;XP_003958836.1	XP_003677570.1	XP_001645480.1	NP_984810.1	SAKL0D10846g	NA	XP_868871.1	NA	226.948	259.523	109.086	130.805	137.97	153.711	-0.155651	N	down	No	No	264.033	308.327	153.405	164.091	185.817	214.171	-0.203365	N	down	295.663	281.883	163.627	164.091	205.312	196.595	0.0614853	N	up	233.256	308.848	137.88	164.091	163.265	214.963	-0.398036	N	down	Klla0A	987998
KLLA0A11440g	YEL018W	XP_003958835.1;XP_003958835.1	XP_003677569.1	XP_001644685.1	NP_984809.1	SAKL0D10868g	NA	NA	NA	16.1308	22.546	7.6921	11.5019	9.6191	13.5153	-0.492855	N	down	No	No	29.1671	24.9284	15.0826	11.9918	18.2691	15.6575	0.240135	N	up	23.0933	22.7897	11.5587	11.9918	14.5178	14.3724	0.0101229	N	up	31.0882	24.9673	16.5195	11.9918	19.5626	15.7153	0.318101	N	up	Klla0A	990779
KLLA0A11462g	YEL019C	XP_003958834.1	XP_003677634.1	XP_001644684.1	NP_984808.1	SAKL0D10890g	XP_716078.1	NA	XP_001713077.3	24.3966	30.0152	11.161	14.3021	14.0497	16.8073	-0.258714	N	down	No	No	38.9859	39.3758	18.1397	16.7359	21.9787	21.8595	0.0241364	N	up	30.2233	35.9966	13.5431	16.7359	16.9868	20.0653	-0.23274	N	down	46.7356	39.4331	22.3407	16.7359	26.455	21.9403	0.279919	N	up	Klla0A	991845
KLLA0A11484g	YCR024C	XP_003957870.1	XP_003673783.1	XP_001644683.1	NP_984807.1	SAKL0D10912g	XP_712125.1;XP_712150.1	XP_660677.1	NP_595079.1	43.6529	63.3113	37.0537	55.4638	46.5767	65.1683	-0.484994	N	down	No	No	71.3306	66.8896	68.4158	59.3153	82.9456	77.3988	0.0911979	N	up	56.7044	61.1539	52.8263	59.3153	66.2082	71.0475	-0.103684	N	down	91.7667	67.0077	89.8962	59.3153	106.435	77.6851	0.448108	N	up	Klla0A	992734
KLLA0A11506g	YNL149C	XP_003959433.1	XP_003677461.1	XP_001644116.1	NP_985602.1	SAKL0E11704g	XP_715760.1;XP_715810.1	NA	NP_595656.1	251.671	339.125	38.7501	54.4591	48.784	63.994	-0.39162	N	down	No	No	419.075	384.092	72.4512	61.0954	87.802	79.8194	0.144001	N	up	336.782	351.13	54.7214	61.0954	68.6345	73.2675	-0.089431	N	down	429.162	384.65	75.598	61.0954	89.4886	80.1143	0.165213	N	up	Klla0A	994478
KLLA0A11528g	YNL151C	XP_003959432.1	XP_003677462.1	XP_001646432.1	NP_985603.1	SAKL0E11682g	XP_715762.1;XP_715812.1	NA	NA	35.8749	83.4623	15.666	37.2674	19.431	43.7829	-1.17364	Y	down	No	No	77.4664	58.277	35.4515	24.6749	42.9517	32.1931	0.411068	N	up	48.868	53.2795	21.3942	24.6749	26.8247	29.5514	-0.146943	N	down	101.63	58.3783	47.3358	24.6749	56.0456	32.3122	0.78047	N	up	Klla0A	995143
KLLA0A11550g	NA	XP_003959431.1	NA	XP_001644115.1	NA	SAKL0E11660g	NA	NA	NA	12.6344	13.3929	7.91869	8.53745	9.89177	10.0321	-0.022941	N	down	No	No	15.4596	15.803	10.7672	10.0762	13.0453	13.1536	-0.00495291	N	down	9.80351	14.4473	6.44239	10.0762	8.07381	12.0741	-0.579102	N	down	12.944	15.8284	9.26179	10.0762	10.9643	13.2022	-0.274946	N	down	Klla0A	996087
KLLA0A11572g	YNL152W	XP_003959430.1	XP_003677463.1	XP_001644114.1	NP_985604.2	SAKL0E11638g	XP_715763.1;XP_715813.1	XP_662254.1	NP_595651.1	19.7795	31.1592	14.5523	24.3606	18.2903	28.6207	-0.646261	N	down	No	No	33.4854	42.2012	26.0269	30.0395	31.5394	39.231	-0.306856	N	down	31.9424	38.5803	23.6199	30.0395	29.6345	36.011	-0.277939	N	down	33.4132	42.2658	26.2588	30.0395	31.0869	39.376	-0.336582	N	down	Klla0A	997457
KLLA0A11594g	YNL139C	XP_003959429.1	XP_003677464.1	XP_001646433.1	NP_985605.2	SAKL0E11616g	XP_710282.1	XP_659830.1	XP_001713043.1	23.7887	28.3799	65.2987	78.8765	81.925	92.6918	-0.178431	N	down	No	No	28.2564	29.5461	96.7698	93.1672	117.323	121.662	-0.0542776	N	down	29.804	27.0111	97.7074	93.1672	122.618	111.677	0.135228	N	up	28.3387	29.5918	99.0727	93.1672	117.291	122.112	-0.0572279	N	down	Klla0A	998888
KLLA0A11605g	YNL138W-A	XP_003959428.1	XP_003677465.1	XP_001644113.1	NP_985606.1	SAKL0E11594g	NA	XP_661694.1	NP_596615.1	85.947	90.4215	11.1083	12.1508	13.971	14.2761	-0.0319996	N	down	No	No	112.575	73.2747	14.4907	9.61857	17.5724	12.5601	0.470301	N	up	76.7015	66.9889	10.093	9.61857	12.6611	11.5292	0.137904	N	up	115.328	73.3921	16.0161	9.61857	18.9634	12.6065	0.59269	N	up	Klla0A	1003776
KLLA0A11616g	YHR127W	XP_003957795.1	XP_003675164.1	XP_001644112.1	NP_985607.1	SAKL0E11550g	NA	NA	NA	115.302	119.36	46.7518	50.1867	58.6351	58.9669	-0.00875363	N	down	No	No	168.67	149.084	64.1058	51.2269	77.7032	66.8998	0.217153	N	up	142.136	136.291	50.4838	51.2269	63.3621	61.4089	0.0462932	N	up	173.583	149.307	66.3455	51.2269	78.5478	67.147	0.228872	N	up	Klla0A	1004255
KLLA0A11638g	YNL138W	XP_003959427.1	XP_003677467.1	XP_001644111.1	NP_985608.2	SAKL0E11528g	XP_717368.1;XP_717457.1	XP_658603.1	NP_587817.1	74.6148	87.559	92.4435	115.568	116.859	135.798	-0.216524	N	down	No	No	102.457	118.536	119.151	126.708	144.442	165.465	-0.196777	N	down	126.182	108.365	141.052	126.708	177.069	151.885	0.221433	N	up	106.377	118.717	126.273	126.708	149.491	166.077	-0.151036	N	down	Klla0A	1005270
KLLA0A11660g	YNL137C	XP_003959426.1	XP_003677468.1	XP_001644110.1	NP_985609.1	SAKL0E11506g	XP_717361.1;XP_717450.1	XP_662768.1	NP_596550.1	104.786	131.407	106.076	135.853	132.755	159.63	-0.266289	N	down	No	No	284.415	196.72	286.597	183.24	347.488	239.105	0.536997	N	up	134.806	179.85	130.801	183.24	164.009	219.484	-0.421162	N	down	377.262	197.063	389.209	183.24	460.727	239.989	0.938884	N	up	Klla0A	1007120
KLLA0A11682g	YNL136W	XP_003959425.1	XP_003677469.1	XP_001644109.1	NP_985610.1	SAKL0E11484g	NA	NA	NP_596770.1	20.0339	32.2169	17.5188	28.6325	21.9384	33.6432	-0.617995	N	down	No	No	26.3665	25.3193	21.3304	18.6829	25.847	24.4047	0.0972693	N	up	23.2193	23.1461	18.3554	18.6829	23.0265	22.4016	0.0477091	N	up	32.1054	25.3547	26.5561	18.6829	31.4465	24.4949	0.371609	N	up	Klla0A	1008960
KLLA0A11704g	YNL135C	XP_003959424.1	XP_003677470.1	XP_001644108.1	NP_985611.1	SAKL0E11462g	XP_710751.1;XP_710770.1;XP_720786.1;XP_721295.1	XP_661202.1;XP_681612.1	NP_595257.1	2994.35	3318.34	397.599	465.76	501.455	547.298	-0.126191	N	down	No	No	2563.99	3108.07	349.14	388.195	423.286	506.941	-0.260591	N	down	3064.15	2841.38	394.921	388.195	495.646	465.334	0.0911433	N	up	2483.87	3112.77	345.111	388.195	408.58	508.815	-0.316243	N	down	Klla0A	1010467
KLLA0A11748g	NA	NA	NA	XP_001644107.1	NA	SAKL0E11440g	NA	NA	NA	9.58106	3.24047	8.68789	3.28672	10.9411	3.86049	1.5001	Y	up	Yes	No	13.1119	5.36961	11.4728	4.44089	13.9125	5.79367	1.22264	Y	up	4.57637	4.90914	3.82155	4.44089	4.78834	5.31827	-0.165851	N	down	27.5207	5.37895	24.5878	4.44089	29.1064	5.8151	2.29437	Y	up	Klla0A	1012732
KLLA0A11770g	YGR191W;YKR039W	XP_003957474.1	XP_003673650.1;XP_003675245.1;XP_003676130.1	XP_001645774.1;XP_001646108.1	NP_986985.1	SAKL0G14014g	XP_711412.1;XP_711447.1;XP_711464.1;XP_712311.1;XP_712455.1;XP_713900.1;XP_714102.1;XP_714611.1;XP_714699.1;XP_714743.1;XP_720611.1;XP_720739.1;XP_722151.1;XP_722265.1	XP_659263.1;XP_663282.1	NP_594316.1;NP_595000.1;NP_595008.3;NP_595051.2;NP_595053.1;NP_596348.1;NP_596769.2;NP_596849.1	246.656	313.43	240.72	330.091	303.749	387.86	-0.35263	N	down	No	No	276.951	292.575	342.45	333.81	415.179	435.816	-0.070761	N	down	283.725	267.476	335.762	333.81	421.209	400.048	0.0742908	N	up	367.901	293.043	463.879	333.81	549.153	437.427	0.327935	N	up	Klla0A	1014918
KLLA0A11792g	NA	NA	NA	NA	NA	SAKL0G14036g	XP_711446.1;XP_711463.1	XP_664194.1	NP_592909.1	20.011	4.87845	44.764	11.1301	56.3318	13.0791	2.1062	Y	up	Yes	No	16.9834	5.91593	50.5064	16.3321	61.1911	21.3204	1.52221	Y	up	7.63008	5.40845	21.9936	16.3321	27.581	19.5707	0.492642	N	up	17.3791	5.9255	52.4579	16.3321	62.0976	21.3992	1.53062	Y	up	Klla0A	1017064
KLLA0A11814g	YJR007W	XP_003956745.1	XP_003673652.1;XP_003676129.1	XP_001645775.1	NP_986986.2	SAKL0G14058g	XP_718720.1;XP_718803.1	XP_660760.1	NP_594081.1	274.347	321.122	172.648	213.897	216.864	251.314	-0.212786	N	down	No	No	365.658	384.891	217.682	212.232	263.829	277.035	-0.0710392	N	down	311.018	351.877	178.703	212.232	224.175	254.3	-0.182375	N	down	383.531	385.525	233.897	212.232	276.892	278.059	-0.00701241	N	down	Klla0A	1021526
KLLA0A11836g	YJR008W	XP_003957475.1	XP_003676128.1	XP_001645243.1	NP_986987.2	SAKL0G14080g	XP_715011.1	XP_661393.1	NP_594340.1	41.068	18.2224	20.7894	9.72381	26.1786	11.4262	1.19555	Y	up	No	No	28.3092	21.3192	17.8748	12.2074	21.6753	15.9433	0.435068	N	up	18.5775	19.49	12.0042	12.2074	15.0625	14.6347	0.0467387	N	up	17.8034	21.3517	11.5658	12.2074	13.6902	16.0022	-0.22005	N	down	Klla0A	1023063
KLLA0A11858g	YGR192C;YJR009C;YJL052W	XP_003956746.1;XP_003957440.1;XP_003957476.1	XP_003673653.1;XP_003674020.1;XP_003676127.1;XP_003677248.1	XP_001645242.1	NP_984891.2	SAKL0C10186g;SAKL0G14102g;SAKL0G17204g	XP_719792.1;XP_719909.1	XP_660187.1;XP_681310.1	NP_595236.1;NP_596154.1	33158.8	35903.1	25326.7	30675.7	32202.3	36046.4	-0.162691	N	down	No	No	22451.1	24829.6	14948.6	15295.3	18124.9	19985.3	-0.140961	N	down	37682.4	22698.3	24163.1	15295.3	30340.2	18344.8	0.725872	N	up	25274.5	24863.7	17273.9	15295.3	20454.4	20059.2	0.0281805	N	up	Klla0A	1024297
KLLA0A11913g	NA	NA	NA	NA	NA	NA	NA	NA	NA	7.18313	4.18228	1.47423	0.860715	1.82416	1.01197	0.840226	N	up	No	No	8.55666	8.30757	1.69569	1.48159	2.0531	1.93415	0.126249	N	up	5.39085	7.59477	0.950877	1.48159	1.18655	1.77542	-0.552271	N	down	8.30592	8.32026	1.58044	1.48159	1.87177	1.9413	-0.0525786	N	down	Klla0A	1029032
KLLA0A11935g	YAR050W;YAL063C	NA	XP_003672965.1;XP_003672965.1;XP_003672965.1;XP_003672965.1;XP_003677075.1;XP_003677075.1;XP_003677093.1;XP_003677093.1;XP_003677093.1;XP_003677093.1;XP_003677101.1;XP_003677101.1;XP_003677101.1;XP_003677101.1	XP_001642148.1;XP_001642148.1;XP_001642148.1;XP_001642148.1;XP_001642148.1;XP_001642148.1;XP_001642148.1;XP_001642148.1;XP_001642148.1;XP_001642279.1;XP_001642279.1;XP_001642279.1;XP_001642279.1;XP_001642279.1;XP_001642279.1;XP_001642279.1;XP_001642279.1;XP_001642279.1;XP_001642279.1;XP_001642279.1;XP_001642279.1;XP_001642279.1;XP_001642279.1;XP_001642279.1;XP_001642279.1;XP_001642328.1;XP_001642…	NP_985455.2;NP_985456.2	SAKL0A02200g;SAKL0H00176g;SAKL0H00286g;SAKL0H00286g;SAKL0H00286g;SAKL0H00286g;SAKL0H21362g;SAKL0H21362g;SAKL0H21362g;SAKL0H21362g	NA	NA	NA	10.1403	4.9499	23.5842	12.2982	30.0977	14.4511	1.05947	Y	up	No	No	6.50775	7.55121	16.7466	17.4293	20.2949	22.7593	-0.159849	N	down	7.26294	6.90331	17.6002	17.4293	22.1067	20.8913	0.0793474	N	up	7.19776	7.56277	18.6396	17.4293	22.0679	22.8434	-0.0473559	N	down	Klla0A	1031062
KLLA0A11957g	YML132W;YAR033W;YAR031W;YGL051W;YNR075W;YHL042W;YNL336W;YAR027W;YAR028W;YHL048W;YDL248W;YKL219W;YFL062W;YGL053W;YGL263W;YBR302C;YJR161C;YAR023C;YGR295C;YCR007C;YHL044W	XP_003955830.1;XP_003956144.1;XP_003958923.1	XP_003674000.1;XP_003675659.1;XP_003677756.1;XP_003678042.1	NA	NA	SAKL0C10868g;SAKL0D15290g;SAKL0H05522g;SAKL0H20614g;SAKL0H20636g	NA	NA	NA	56.4058	49.6177	15.1292	14.3934	19.083	16.9139	0.17441	N	up	No	No	45.9891	38.7724	16.9301	13.4682	20.5123	17.601	0.248269	N	up	51.668	35.4442	18.5786	13.4682	23.3252	16.1561	0.543251	N	up	27.1926	38.825	10.3447	13.4682	12.2474	17.666	-0.506156	N	down	Klla0A	1041208
KLLA0A11979g	NA	XP_003957299.1;XP_003957736.1	NA	NA	NA	NA	NA	NA	NA	29.4373	23.3609	20.3809	17.3491	25.7217	20.3847	0.335638	N	up	No	No	20.4245	17.6932	16.6732	13.0587	20.2042	17.0658	0.267824	N	up	24.2491	16.1743	19.0982	13.0587	23.9903	15.6649	0.625402	N	up	12.2505	17.7167	10.6221	13.0587	12.5811	17.1288	-0.420998	N	down	Klla0A	1041901
KLLA0A12001g	NA	NA	NA	NA	NA	NA	NA	NA	NA	66.5569	163.381	9.18042	22.8121	11.6007	26.8003	-1.20661	Y	down	No	Yes	82.9047	98.482	12.2746	13.1448	14.8915	17.1722	-0.222914	N	down	121.956	90.0308	17.1062	13.1448	21.4833	15.7627	0.452859	N	up	66.0364	98.6263	10.2286	13.1448	12.108	17.2356	-0.496593	N	down	Klla0A	1044941
KLLA0A12045g	YGL262W	XP_003954583.1;XP_003955756.1;XP_003956788.1	XP_003675371.1	NA	NP_986308.2	NA	NA	XP_868923.1	NA	135.439	140.449	93.9784	104.47	120.227	122.742	-0.0295407	N	down	No	No	58.2719	65.1136	46.4795	46.9773	56.3871	61.4549	-0.121945	N	down	85.1246	59.5195	65.2589	46.9773	82.018	56.4089	0.545448	N	up	43.0938	65.1804	34.6625	46.9773	41.0574	61.6818	-0.576948	N	down	Klla0A	1048618
KLLA0A12067g	NA	NA	NA	NA	NA	NA	NA	XP_660911.1	NA	279.835	271.277	34.5967	35.5258	43.8859	41.7381	0.0730935	N	up	No	No	166.992	207.713	26.1194	30.3207	31.6917	39.6318	-0.328627	N	down	197.638	189.876	30.3644	30.3207	38.1223	36.3783	0.0766597	N	up	104.351	207.962	17.9244	30.3207	21.2217	39.7782	-0.891461	N	down	Klla0A	1050804
KLLA0A12089g	YEL066W	XP_003957011.1	XP_003676206.1	XP_001647363.1	NA	NA	XP_722734.1	XP_658230.1;XP_658573.1;XP_661429.1;XP_662934.1;XP_681365.1;XP_682473.1	NP_593494.1;NP_595143.1	529.326	562.048	110.815	121.075	138.79	142.273	-0.0360306	N	down	No	No	513.951	430.559	140.654	109.335	170.544	142.787	0.254967	N	up	387.623	393.615	102.349	109.335	128.341	131.068	-0.0288529	N	down	393.053	431.212	110.636	109.335	130.989	143.315	-0.128279	N	down	Klla0A	1052066
KLLA0B00143g	YKL221W	NA	NA	NA	NA	SAKL0G03960g	XP_718716.1;XP_718799.1	XP_661262.1	NA	0	0	0	0	NA	NA	NA	NA	NA	No	No	0	0	0	0	NA	NA	NA	NA	NA	0	0	0	0	NA	NA	NA	NA	NA	0	0	0	0	NA	NA	NA	NA	NA	Klla0B	4365
KLLA0B00166g	NA	NA	NA	NA	NA	NA	NA	NA	NA	0	0	0	0	NA	NA	NA	NA	NA	No	No	0	0	0	0	NA	NA	NA	NA	NA	0	0	0	0	NA	NA	NA	NA	NA	0	0	0	0	NA	NA	NA	NA	NA	Klla0B	6575
KLLA0B00187g	NA	NA	NA	NA	NA	NA	NA	XP_664155.1	NA	0	0	0	0	NA	NA	NA	NA	NA	No	No	0	0	0	0	NA	NA	NA	NA	NA	0	0	0	0	NA	NA	NA	NA	NA	0	0	0	0	NA	NA	NA	NA	NA	Klla0B	7994
KLLA0B00220g	NA	NA	NA	NA	NA	NA	NA	NA	NA	0	0	0	0	NA	NA	NA	NA	NA	No	No	0	0	0	0	NA	NA	NA	NA	NA	0	0	0	0	NA	NA	NA	NA	NA	0	0	0	0	NA	NA	NA	NA	NA	Klla0B	8804
KLLA0B00242g	YBR299W;YJL216C;YGR287C;YGR292W;YOL157C;YIL172C;YJL221C	NA	NA	XP_001646218.1	NA	SAKL0A00154g;SAKL0A05654g;SAKL0A05698g;SAKL0C00176g;SAKL0C02112g	XP_719427.1;XP_721891.1;XP_722052.1	XP_661120.1;XP_662447.1	NP_595063.1	0	0	0	0	NA	NA	NA	NA	NA	No	No	0	0	0	0	NA	NA	NA	NA	NA	0	0	0	0	NA	NA	NA	NA	NA	0	0	0	0	NA	NA	NA	NA	NA	Klla0B	9894
KLLA0B00264g	YBR298C;YDL247W;YGR289C;YJR160C	NA	NA	NA	NA	SAKL0A05676g;SAKL0E05258g	XP_721890.1;XP_722051.1	XP_661119.1;XP_662908.1;XP_663521.1;XP_664438.1;XP_664723.1;XP_680613.1	NA	0	0	0	0	NA	NA	NA	NA	NA	No	No	0	0	0	0	NA	NA	NA	NA	NA	0	0	0	0	NA	NA	NA	NA	NA	0	0	0	0	NA	NA	NA	NA	NA	Klla0B	12844
KLLA0B00286g	YBR093C;YAR071W	NA	NA	NA	NA	SAKL0B07678g;SAKL0G17028g	XP_713416.1;XP_713442.1;XP_713452.1;XP_713478.1;XP_718284.1;XP_718379.1;XP_722656.1;XP_722801.1	XP_658168.1;XP_682014.1	NP_595181.1;NP_595928.1;NP_596847.1	3.92762	3.82207	3.96475	4.18588	5.06462	4.91944	0.0473634	N	up	No	No	3.48519	2.06414	3.92484	1.99605	4.75695	2.61426	0.965939	N	up	2.27524	1.88667	2.14968	1.99605	2.69914	2.39954	0.260723	N	up	3.43674	2.06564	3.69242	1.99605	4.37355	2.6239	0.850324	N	up	Klla0B	15257
KLLA0B00308g	YKR102W;YHR213W	NA	XP_003672965.1;XP_003672965.1;XP_003672965.1;XP_003672965.1;XP_003677075.1;XP_003677075.1;XP_003677075.1;XP_003677075.1;XP_003677093.1;XP_003677093.1;XP_003677093.1;XP_003677093.1;XP_003677093.1;XP_003677093.1;XP_003677093.1;XP_003677093.1;XP_003677093.1;XP_003677094.1;XP_003677094.1;XP_003677101.1;XP_003677101.1;XP_003677101.1;XP_003677101.1	NA	NA	NA	NA	NA	NP_588212.1	14.5998	2.55153	12.2495	2.1854	15.6412	2.56807	2.60603	Y	up	Yes	No	14.7879	1.54029	13.8577	1.2771	16.8041	1.66925	3.34802	Y	up	3.01596	1.40807	2.5686	1.2771	3.22618	1.53222	1.09941	Y	up	48.79	1.54238	45.6204	1.2771	54.0271	1.67541	5.04448	Y	up	Klla0B	18349
KLLA0B00352g	YOR378W	XP_003954855.1;XP_003955824.1;XP_003955825.1;XP_003956612.1	XP_003673203.1;XP_003673513.1;XP_003674490.1;XP_003675399.1	XP_001645631.1	NA	SAKL0D01386g	XP_713954.1;XP_714012.1;XP_719999.1;XP_720131.1	XP_660229.1;XP_682639.1	NP_595059.1	103.473	158.034	90.3614	147.93	114.62	173.843	-0.600615	N	down	No	No	73.7542	104.601	76.9858	99.9448	93.3524	130.585	-0.485101	N	down	136.133	95.6233	134.856	99.9448	169.331	119.865	0.50055	N	up	163.528	104.747	171.819	99.9448	203.425	131.067	0.638003	N	up	Klla0B	22476
KLLA0B00385g	YNR056C	NA	NA	NA	NA	SAKL0H11484g	XP_718253.1;XP_718348.1	NA	NA	42.2931	20.935	39.3087	20.2396	49.6034	23.782	1.06069	Y	up	Yes	No	20.2259	21.2956	24.8909	23.7951	30.1829	31.0905	-0.0425764	N	down	16.9036	19.4676	19.7822	23.7951	24.7943	28.5384	-0.191996	N	down	23.1739	21.3246	28.3614	23.7951	33.5624	31.2054	0.114328	N	up	Klla0B	25847
KLLA0B00407g	YNR057C	NA	NA	NA	NA	SAKL0H11506g	XP_718255.1;XP_718350.1	NA	NA	30.2182	28.3653	11.1223	10.8064	14.1236	12.6958	0.155433	N	up	No	No	43.4228	35.3681	17.179	13.2622	20.8253	17.3199	0.264834	N	up	35.7289	32.3334	14.0465	13.2622	17.6384	15.8984	0.150603	N	up	52.2387	35.4216	21.4278	13.2622	25.3784	17.3839	0.553397	N	up	Klla0B	27872
KLLA0B00429g	YNR058W	NA	NA	NA	NA	SAKL0H09504g;SAKL0H11528g	XP_718256.1;XP_718351.1	XP_664248.1	NA	44.1081	27.6439	32.7497	21.4802	41.7371	25.2378	0.726575	N	up	No	No	29.5624	19.3157	29.4095	17.6782	35.6585	23.108	0.637171	N	up	22.6332	17.6573	21.4721	17.6782	26.964	21.211	0.358677	N	up	23.5875	19.3402	24.2174	17.6782	28.6679	23.1933	0.327048	N	up	Klla0B	29147
KLLA0B00451g	NA	NA	NA	NA	NA	NA	XP_720595.1;XP_720723.1	XP_662144.1;XP_681675.1;XP_682383.1	NP_595070.1	150.257	62.3108	102.501	45.4277	130.341	53.3634	1.28849	Y	up	Yes	No	118.659	89.7949	92.7724	65.8062	112.486	85.8954	0.383101	N	up	67.755	82.0927	51.7909	65.8062	64.9739	78.8463	-0.281247	N	down	83.8248	89.9424	67.6447	65.8062	80.1108	86.213	-0.107776	N	down	Klla0B	31822
KLLA0B00473g	NA	NA	NA	NA	NP_986136.1	SAKL0A06556g	XP_714049.1;XP_714324.1;XP_722144.1;XP_722258.1	XP_658641.1	NA	59.4283	156.571	37.4438	105.468	47.0303	123.911	-1.39794	Y	down	No	Yes	146.127	146.714	124.117	114.364	150.324	149.204	0.011385	N	up	78.5533	134.135	64.3223	114.364	80.7009	136.961	-0.765965	N	down	237.309	146.981	203.87	114.364	241.351	149.756	0.68482	N	up	Klla0B	35614
KLLA0B00495g	YGL117W	XP_003955026.1;XP_003958510.1	XP_003677793.1	XP_001647312.1	XP_002999491.1	SAKL0A06578g	NA	NA	NA	30.3858	34.0402	15.2553	16.6378	19.128	19.5466	-0.0322965	N	down	No	No	131.72	88.2315	72.6811	44.4159	88.0725	58.041	0.612033	N	up	84.2194	80.6581	44.2969	44.4159	55.5371	53.2766	0.0674225	N	up	134.548	88.3524	75.9936	44.4159	89.9535	58.2555	0.635829	N	up	Klla0B	37797
KLLA0B00517g	NA	NA	NA	XP_001646822.1	NP_982725.1	SAKL0A06666g	XP_716881.1;XP_716949.1;XP_719801.1;XP_719918.1	XP_658892.1	NP_594554.1	118.414	12.621	35.7358	3.90442	44.9918	4.58858	3.29275	Y	up	Yes	No	172.391	30.1383	62.8249	9.85873	76.1218	12.8805	2.58149	Y	up	23.6095	27.551	8.38784	9.85873	10.5307	11.8232	-0.156447	N	down	221.686	30.1782	81.1124	9.85873	96.0389	12.9281	2.90965	Y	up	Klla0B	39267
KLLA0B00539g	YGL119W	XP_003955027.1	XP_003676273.1	XP_001645414.1	NP_982724.1	SAKL0A06688g	XP_718154.1;XP_718424.1	XP_664176.1	NP_596237.1	92.5737	89.9522	95.8406	96.6512	121.049	113.578	0.092118	N	up	No	No	82.2902	81.6909	97.5421	88.9346	118.25	116.142	0.0251109	N	up	89.9558	74.6816	101.835	88.9346	127.839	106.61	0.262338	N	up	90.7251	81.8153	110.25	88.9346	130.497	116.572	0.163661	N	up	Klla0B	40064
KLLA0B00561g	YGL120C	XP_003955028.1	XP_003676272.1	XP_001645415.1	NP_982723.1	SAKL0A06710g	XP_721644.1;XP_721764.1	XP_657737.1	NP_595937.1	45.9951	114.003	63.1513	162.676	79.4186	191.139	-1.26723	Y	down	No	Yes	90.1578	92.3073	149.765	141.261	181.409	184.347	-0.0222349	N	down	53.9924	84.3912	85.7612	141.261	107.547	169.219	-0.654923	N	down	130.463	92.4667	219.992	141.261	260.454	185.029	0.491004	N	up	Klla0B	42284
KLLA0B00583g	YER027C;YGL208W	XP_003959152.1	XP_003676493.1;XP_003677210.1	XP_001642216.1	NP_985217.1	SAKL0F02002g	XP_714117.1;XP_714255.1	XP_664174.1	NP_588485.1	63.5728	50.2163	60.4396	49.5844	76.3323	58.2608	0.389941	N	up	No	No	87.3213	84.0781	90.0765	79.8853	109.192	104.264	0.0625376	N	up	70.8544	76.8668	70.7343	79.8853	88.7766	95.7078	-0.111291	N	down	79.9386	84.2187	83.4941	79.8853	98.8328	104.65	-0.0863141	N	down	Klla0B	44819
KLLA0B00627g	YER029C	XP_003959154.1	XP_003677212.1	XP_001643082.1	NP_985287.2	SAKL0F01958g	XP_710386.1;XP_710394.1	NA	NP_594151.1	34.6643	47.607	10.2553	14.6114	12.866	17.1661	-0.417649	N	down	No	No	50.8209	49.1504	17.2662	15.2114	20.9309	19.8577	0.0661255	N	up	44.5214	44.9337	14.7286	15.2114	18.4906	18.2281	0.0148395	N	up	45.9406	49.2276	15.8231	15.2114	18.7223	19.9312	-0.0991691	N	down	Klla0B	48523
KLLA0B00649g	YER030W	XP_003959155.1	XP_003677213.1	XP_001643081.1	NP_985288.1	SAKL0F01936g	XP_712353.1;XP_712389.1	XP_662732.1	NA	120.938	159.088	39.9955	53.6935	50.2937	63.0981	-0.327485	N	down	No	No	238.472	228.475	66.4246	58.7747	80.5075	76.7312	0.067955	N	up	239.347	208.875	63.8407	58.7747	80.1104	70.434	0.184273	N	up	228.129	228.838	64.8947	58.7747	76.8237	77.0149	-0.0056024	N	down	Klla0B	49535
KLLA0B00671g	YGL210W;YER031C	XP_003958146.1	XP_003676491.1	XP_001643080.1	NP_985289.2	SAKL0F01914g	XP_710387.1;XP_710395.1	XP_657951.1;XP_664578.1	NP_593667.1	91.8101	102.115	61.7955	72.387	77.7246	85.0592	-0.130302	N	down	No	No	109.124	105.725	91.9041	80.1695	111.381	104.663	0.0895131	N	up	103.855	96.6545	80.6458	80.1695	101.194	96.0733	0.0739071	N	up	99.7415	105.89	86.2796	80.1695	102.143	105.05	-0.0418288	N	down	Klla0B	50393
KLLA0B00693g	YER032W	XP_003959156.1	XP_003677214.1	XP_001643079.1	NP_985290.2	SAKL0F01892g	NA	NA	NA	8.76302	13.1179	16.5054	25.1546	20.5237	29.5571	-0.527794	N	down	No	No	17.6695	16.3079	32.9563	28.1626	39.9143	36.7517	0.124105	N	up	16.3933	14.9092	29.2216	28.1626	36.6496	33.7358	0.113641	N	up	18.199	16.3356	34.5136	28.1626	40.8501	36.8876	0.135802	N	up	Klla0B	52711
KLLA0B00715g	YER033C	XP_003959157.1	XP_003677215.1	XP_001643078.1	NP_985291.1;NP_985291.1	SAKL0F01870g	XP_722424.1;XP_722563.1	NA	NA	17.0064	23.8306	26.8682	38.1426	33.5736	44.8194	-0.417881	N	down	No	No	26.9109	32.0077	48.4259	52.6707	58.6907	68.7569	-0.230055	N	down	26.5996	29.2623	45.7085	52.6707	57.3442	63.1142	-0.140046	N	down	30.1741	32.0607	55.2023	52.6707	65.3349	69.0111	-0.0829086	N	down	Klla0B	55372
KLLA0B00737g	YGL211W	XP_003958147.1	XP_003676490.1	XP_001647021.1	NP_985292.1	SAKL0F01848g	XP_722706.1;XP_722852.1	XP_658054.1	NP_596064.1	16.9929	34.6124	11.0781	23.5508	13.8509	27.6656	-0.999987	N	down	No	No	37.1515	35.6969	27.6695	24.6715	33.528	32.1897	0.0526327	N	up	28.7665	32.6363	20.8271	24.6715	26.1337	29.5483	-0.187257	N	down	62.4677	35.7614	48.0136	24.6715	56.8376	32.3087	0.800103	N	up	Klla0B	58094
KLLA0B00759g	YKL079W;YBL063W	XP_003959916.1	XP_003676693.1	XP_001645509.1	NP_983630.1;NP_984241.1	SAKL0G05016g	XP_713072.1;XP_713095.1;XP_713727.1;XP_713761.1;XP_716334.1;XP_716396.1	XP_662947.1;XP_664467.1;XP_680816.1	NP_594686.1;NP_596620.1	38.6453	40.8116	33.1048	35.2685	41.5866	41.4455	0.00439572	N	up	No	No	46.3026	42.1784	46.4438	39.5071	56.2779	51.6094	0.134708	N	up	42.6195	38.5591	40.065	39.5071	50.274	47.3732	0.0909352	N	up	46.2476	42.241	48.0175	39.5071	56.8591	51.8001	0.142394	N	up	Klla0B	59965
KLLA0B00781g	YDR424C	XP_003957615.1	XP_003676950.1	XP_001645510.1	NP_984289.1	SAKL0G05038g	NA	NA	NP_594368.1	146.259	139.242	44.2866	41.1694	55.6499	48.372	0.201848	N	up	No	No	157.201	148.341	58.4501	49.5677	70.8411	64.7279	0.131951	N	up	122.411	135.615	42.5225	49.5677	53.3196	59.4154	-0.15383	N	down	154.648	148.574	57.4399	49.5677	68.0051	64.9671	0.0676687	N	up	Klla0B	61451
KLLA0B00803g	YDR425W	XP_003956668.1	XP_003677915.1	XP_001645511.1	NP_984288.1	SAKL0G05060g	XP_719444.1;XP_719573.1	XP_663955.1	NP_596737.1	23.4191	23.8241	25.9936	26.7944	32.7402	31.4842	0.056268	N	up	No	No	24.3706	30.9385	28.9469	34.1422	35.0847	44.6004	-0.339944	N	down	32.0741	28.2833	36.7877	34.1422	46.1781	40.9396	0.178202	N	up	22.2087	30.9831	27.1496	34.1422	32.1458	44.7652	-0.468628	N	down	Klla0B	62255
KLLA0B00825g	YDR427W	XP_003957614.1	XP_003676951.1	XP_001646781.1	NP_984287.1	SAKL0G05082g	XP_719443.1;XP_719572.1	XP_661320.1	NP_593594.1	226.733	202.443	144.421	131.519	182.219	154.553	0.237619	N	up	No	No	250.96	230.159	197.854	167.747	239.839	219.026	0.130368	N	up	224.142	210.413	170.305	167.747	213.731	201.05	0.0880759	N	up	238.475	230.52	192.722	167.747	228.143	219.835	0.0533756	N	up	Klla0B	64284
KLLA0B00847g	YDR429C	XP_003956669.1	XP_003677916.1	XP_001646780.1	NP_984285.1	SAKL0G05126g	XP_715036.1	NA	NP_595727.1	235.352	330.513	128.067	189.74	160.631	222.917	-0.472887	N	down	No	No	408.654	408.816	213.789	198.583	259.111	259.164	-0.00137099	N	down	315.69	373.757	158.286	198.583	198.516	237.896	-0.26182	N	down	464.163	409.521	247.541	198.583	293.083	260.122	0.170668	N	up	Klla0B	65983
KLLA0B00869g	YML009C	XP_003956670.1	XP_003677917.1	XP_001646779.1	NP_984284.1	SAKL0G05148g	NA	NA	NP_596108.1	575.892	697.881	21.8255	27.7771	27.4662	32.6388	-0.249216	N	down	No	No	1810.62	948.173	76.2325	36.715	92.3831	47.8799	0.93729	N	up	789.999	866.894	30.6189	36.715	38.3951	43.9515	-0.203088	N	down	2293.87	949.964	96.0856	36.715	113.727	48.0571	1.22921	Y	up	Klla0B	67723
KLLA0B00891g	YML010W	XP_003956671.1	XP_003677918.1	NA	NP_984283.2	SAKL0G05170g	XP_722364.1;XP_722503.1	XP_659302.1	NP_593191.1	33.4327	47.9476	73.7607	110.009	92.5642	129.273	-0.482168	N	down	No	No	47.0771	49.83	106.26	103.954	128.849	135.704	-0.0792498	N	down	44.3556	45.5557	96.1885	103.954	120.649	124.567	-0.0467409	N	down	49.9646	49.9116	114.933	103.954	136.066	136.205	-0.00300956	N	down	Klla0B	68242
KLLA0B00913g	YML011C	XP_003956672.1	XP_003677919.1	XP_001645514.1	NP_984282.1	SAKL0G05192g	XP_716070.1	NA	NA	44.6623	32.7264	10.8557	8.36931	13.6315	9.8315	0.469516	N	up	No	No	59.218	34.1075	17.8152	9.62813	21.5993	12.5649	0.759259	N	up	31.433	31.1825	8.99484	9.62813	11.2866	11.5338	-0.0430168	N	down	69.9618	34.166	21.0062	9.62813	24.8731	12.6114	0.966223	N	up	Klla0B	71670
KLLA0B00935g	YML012W	XP_003957613.1	XP_003676952.1;XP_003677920.1	XP_001645515.1;XP_001646778.1	NP_984281.1	SAKL0G05214g	XP_716074.1	XP_661769.1	NP_593403.1	316.798	429.341	131.047	187.329	164.331	220.118	-0.42183	N	down	No	No	414.934	465.804	154.773	158.573	187.6	207.085	-0.142242	N	down	428.338	425.838	151.907	158.573	190.635	190.088	0.0045228	N	up	383.445	466.518	144.536	158.573	171.113	207.85	-0.279858	N	down	Klla0B	72528
KLLA0B00957g	YDR430C	XP_003957612.1	XP_003676953.1	XP_001645516.1	NP_984280.2	SAKL0G05236g	XP_716075.1	XP_661457.1	NP_595299.2	41.2694	16.4129	76.2768	31.6195	96.2756	37.1547	1.3737	Y	up	No	No	53.9439	29.9267	116.956	59.5451	141.742	77.7379	0.865918	N	up	23.0898	27.3596	47.7252	59.5451	59.8785	71.358	-0.253988	N	down	77.4874	29.9751	170.707	59.5451	202.081	78.0253	1.37126	Y	up	Klla0B	73661
KLLA0B00979g	YDR432W	XP_003957611.1	XP_003676954.1	XP_001646777.1	NP_984279.1	SAKL0G05258g	NA	XP_662582.1	NP_594570.1	714.001	961.608	559.996	831.352	707.611	976.826	-0.465119	N	down	No	No	782.181	1053.24	539.549	669.477	653.755	873.688	-0.418342	N	down	945.932	962.918	628.613	669.477	788.929	801.991	-0.0240564	N	down	826.045	1055.06	578.783	669.477	685.175	876.918	-0.356463	N	down	Klla0B	77439
KLLA0B01001g	YML013W	XP_003956673.1	XP_003677921.1	XP_001645517.1	NP_984278.1	SAKL0G05280g	XP_715444.1;XP_715514.1	NA	NA	26.1414	27.9776	30.3974	33.4769	38.0958	39.3411	-0.0471682	N	down	No	No	27.4214	29.1111	36.3025	35.1585	44.0166	45.9235	-0.0635178	N	down	32.9329	26.6131	41.4756	35.1585	52.0284	42.1542	0.308656	N	up	26.8971	29.1545	35.829	35.1585	42.4203	46.0932	-0.11263	N	down	Klla0B	79432
KLLA0B01023g	YML014W	XP_003956674.1	XP_003677922.1	XP_001646776.1	NP_984277.2	SAKL0G05302g	XP_716134.1;XP_716218.1	XP_662723.1	NP_593681.1	28.4264	55.1948	14.5294	29.2339	18.1321	34.3519	-0.923674	N	down	No	No	56.288	48.8429	29.8708	23.8215	36.1832	31.1123	0.233527	N	up	52.2219	44.6515	26.254	23.8215	32.9672	28.5587	0.208691	N	up	66.1907	48.915	35.3766	23.8215	41.8838	31.2273	0.42999	N	up	Klla0B	81664
KLLA0B01045g	YDR434W	XP_003957610.1	XP_003676955.1	XP_001645518.1;XP_001646775.1	NP_984276.1	SAKL0G05324g	XP_712304.1;XP_712448.1;XP_716135.1;XP_716219.1	XP_662754.1	NP_594335.1	104.784	90.6897	93.4635	83.2039	117.973	97.7622	0.271172	N	up	No	No	74.0052	92.2141	80.5155	92.1139	97.5878	120.302	-0.300422	N	down	86.6904	84.3014	89.4098	92.1139	112.221	110.428	0.0241253	N	up	77.1015	92.3521	85.2688	92.1139	100.967	120.746	-0.255783	N	down	Klla0B	82972
KLLA0B01067g	YML015C	XP_003957609.1	XP_003676956.1	XP_001645519.1	NP_984275.1	SAKL0G05346g	XP_712687.1;XP_712724.1	XP_681499.1	NP_593491.1	52.3768	57.384	34.2678	38.3683	43.19	45.0865	-0.0619952	N	down	No	No	58.5254	59.4541	40.6336	38.1733	49.2771	49.8246	-0.0296223	N	down	51.6733	54.3552	34.2429	38.1733	42.9649	45.7358	-0.0944277	N	down	58.0276	59.5555	40.9604	38.1733	48.4971	50.0088	-0.0498402	N	down	Klla0B	84876
KLLA0B01089g	YDR435C	XP_003957608.1	XP_003676957.1	XP_001646774.1	NP_984274.2	SAKL0G05368g	XP_716133.1;XP_716217.1;XP_718126.1;XP_718395.1	XP_868820.1	NP_596515.1	39.747	49.8517	21.5978	28.389	27.1163	33.3547	-0.299529	N	down	No	No	56.4717	53.7884	37.0185	31.9417	44.8738	41.7213	0.107651	N	up	50.1032	49.1728	31.5603	31.9417	39.5919	38.2968	0.0530859	N	up	65.9807	53.8685	44.0445	31.9417	52.1417	41.8754	0.322971	N	up	Klla0B	85996
KLLA0B01111g	YML016C;YDR436W	XP_003956675.1	XP_003677923.1	XP_001646773.1	NP_985190.2	SAKL0G05390g	XP_711124.1;XP_711142.1;XP_713085.1;XP_713108.1;XP_718028.1;XP_718094.1	XP_658014.1;XP_661397.1	NP_587898.1;NP_593373.1;NP_596317.1	63.9636	58.5249	85.7633	82.4023	108.246	96.8267	0.16093	N	up	No	No	59.9616	75.0574	85.5346	98.4035	103.722	128.566	-0.310741	N	down	76.7359	68.6151	105.479	98.4035	132.364	118.013	0.168392	N	up	56.4811	75.162	82.3927	98.4035	97.548	129.041	-0.399442	N	down	Klla0B	88088
KLLA0B01133g	YDR437W	XP_003957607.1	XP_003676958.1	XP_001645520.1	NP_985189.1	SAKL0G05412g	XP_714916.1;XP_714979.1	XP_681339.1	NP_593243.2	217.053	157.898	34.679	26.6167	43.8806	31.2778	0.489074	N	up	No	No	290.247	210.442	49.3906	33.1495	59.8418	43.3011	0.47767	N	up	187.185	192.385	30.9334	33.1495	38.8036	39.7469	-0.0289634	N	down	371.307	210.763	64.0442	33.1495	75.8236	43.4611	0.810071	N	up	Klla0B	90746
KLLA0B01155g	YML017W	XP_003956676.1	XP_003677924.1	XP_001645521.1	NA	SAKL0G05434g	XP_721587.1;XP_721707.1	NA	NA	66.1358	121.423	80.7861	152.21	101.185	178.846	-0.822075	N	down	No	No	94.3176	119.022	112.351	130.669	136.248	170.653	-0.327509	N	down	116.761	108.809	133.833	130.669	167.976	156.646	0.101292	N	up	117.866	119.202	143.186	130.669	169.533	171.283	-0.0135034	N	down	Klla0B	91522
KLLA0B01177g	YML018C	XP_003956677.1	XP_003677925.1	XP_001645522.1	NP_985187.1	SAKL0G05456g	XP_716091.1	XP_657692.1	NP_596306.1	167.9	247.926	109.509	172.464	138.809	202.649	-0.545685	N	down	No	No	155.769	212.577	130.623	163.867	158.363	213.959	-0.435711	N	down	192.988	194.34	155.264	163.867	194.976	196.399	-0.0110317	N	down	177.53	212.911	151.768	163.867	179.673	214.75	-0.257355	N	down	Klla0B	94268
KLLA0B01199g	YML019W	XP_003956678.1	XP_003677926.1	XP_001645523.1	NP_985186.2	SAKL0G05478g	XP_716090.1	XP_680695.1	NP_001018226.1	67.7791	67.1638	32.7497	33.523	41.1217	39.3912	0.0614978	N	up	No	No	57.7822	70.4826	37.2459	41.9708	45.1304	54.8273	-0.269993	N	down	63.4213	64.4342	39.4399	41.9708	49.5145	50.327	-0.0201036	N	down	58.0054	70.5865	38.3286	41.9708	45.3861	55.0299	-0.269887	N	down	Klla0B	95848
KLLA0B01221g	YDR439W	XP_003959003.1	XP_003676960.1	XP_001645524.1	NP_985185.2	SAKL0G05500g	NA	NA	NA	61.9881	78.6965	23.6628	31.1243	29.6587	36.5659	-0.302976	N	down	No	No	92.312	77.5839	36.6718	28.7352	44.4462	37.5003	0.237878	N	up	75.1368	70.9297	28.4294	28.7352	35.6696	34.4229	0.0446199	N	up	97.1096	77.714	39.6792	28.7352	46.9724	37.6389	0.309019	N	up	Klla0B	97172
KLLA0B01243g	YML020W	XP_003956679.1	XP_003677927.1	XP_001645525.1	NP_985184.1	SAKL0G05522g	XP_716068.1	XP_657697.1	NA	18.8392	13.8061	23.2521	18.1359	29.4463	21.3108	0.467245	N	up	No	No	17.383	21.9039	23.334	27.3035	28.3161	35.6749	-0.346112	N	down	22.1981	20.0238	28.7989	27.3035	36.142	32.7465	0.150739	N	up	13.9536	21.9341	18.9876	27.3035	22.4831	35.8067	-0.657746	N	down	Klla0B	97985
KLLA0B01265g	YML021C	XP_003956680.1	XP_003677928.1	XP_001645526.1	NP_985183.1	SAKL0G05544g	XP_716089.1	XP_680704.1	NP_587889.1	49.8406	46.973	28.2089	27.6272	35.4266	32.4603	0.125606	N	up	No	No	64.6695	63.2036	42.3608	37.7755	51.3384	49.3158	0.0572671	N	up	51.8495	57.7815	32.6413	37.7755	40.9771	45.2685	-0.146889	N	down	66.159	63.3041	44.202	37.7755	52.3146	49.4981	0.0758058	N	up	Klla0B	100414
KLLA0B01287g	YDR440W	XP_003959004.1	XP_003676961.1	XP_001645527.1	NP_985182.2	SAKL0G05566g	XP_716067.1	XP_657695.1	NA	34.0981	44.6072	40.7323	54.4	51.2127	63.9215	-0.320102	N	down	No	No	43.0978	48.0981	52.1183	54.0463	63.1634	70.5353	-0.162745	N	down	40.4106	43.9729	46.686	54.0463	58.5868	64.747	-0.148479	N	down	46.1264	48.1791	56.962	54.0463	67.438	70.7962	-0.0756855	N	down	Klla0B	101771
KLLA0B01309g	YML022W;YDR441C	XP_003956681.1	XP_003677929.1	XP_001645528.1	NP_985181.1	SAKL0G05588g	XP_722359.1;XP_722498.1	XP_682352.1	NP_594433.1	369.4	459.906	114.253	155.077	144.629	182.225	-0.333138	N	down	No	No	540.014	717.943	170.971	210.203	207.169	274.387	-0.404962	N	down	551.633	656.361	167.466	210.203	210.065	251.869	-0.262243	N	down	586.08	719.122	188.812	210.203	223.517	275.401	-0.3021	N	down	Klla0B	103734
KLLA0B01331g	YML023C	XP_003956682.1	XP_003677930.1	XP_001646772.1	NP_985180.2	SAKL0G05610g	NA	NA	NA	52.05	44.2935	43.4211	38.2752	54.8857	44.9771	0.287625	N	up	No	No	39.7271	50.3905	41.7494	48.6355	50.6264	63.5528	-0.328254	N	down	44.3778	46.0648	44.4109	48.6355	55.7607	58.336	-0.0604099	N	down	40.4248	50.4581	43.2932	48.6355	51.2652	63.7876	-0.305949	N	down	Klla0B	104649
KLLA0B01353g	YDR443C	XP_003959005.1	XP_003676962.1	XP_001645529.1	NP_985179.1	SAKL0G05632g	XP_722362.1;XP_722362.1;XP_722362.1;XP_722362.1;XP_722501.1;XP_722501.1;XP_722501.1;XP_722501.1	XP_659682.1	NA	19.9812	19.7476	54.8232	55.9504	69.4555	65.7447	0.0796892	N	up	No	No	18.1261	20.1278	55.514	56.8399	67.3054	74.2178	-0.14555	N	down	20.6376	18.401	60.3183	56.8399	75.6931	68.1265	0.151858	N	up	18.6199	20.1594	58.1717	56.8399	68.8642	74.4921	-0.113334	N	down	Klla0B	106220
KLLA0B01375g	YDR444W	XP_003959006.1	XP_003676963.1	XP_001645530.1	NP_985178.2	SAKL0G05654g	XP_710647.1;XP_721899.1;XP_722060.1	XP_682679.1	NP_593822.2	17.781	16.5657	22.2296	21.7579	28.0945	25.5672	0.136575	N	up	No	No	23.7975	28.1902	32.0776	35.0049	38.9041	45.7149	-0.242532	N	down	29.1041	25.7715	37.4631	35.0049	47.0066	41.9628	0.166161	N	up	24.4653	28.2335	33.6602	35.0049	39.8468	45.8839	-0.200262	N	down	Klla0B	110709
KLLA0B01397g	NA	NA	NA	NA	NP_985177.1	SAKL0G05676g	XP_715281.1;XP_715346.1;XP_718903.1;XP_719005.1;XP_719735.1;XP_719852.1	XP_662396.1;XP_681586.1;XP_682335.1	NA	31.3201	67.0935	35.1291	78.0248	44.4715	91.6849	-1.04322	Y	down	No	No	27.2733	43.3967	33.1798	48.5473	40.1924	63.4249	-0.642781	N	down	55.4338	39.6718	64.8922	48.5473	81.4734	58.2188	0.488528	N	up	41.5633	43.4565	51.9915	48.5473	61.5471	63.6592	-0.0414964	N	down	Klla0B	112771
KLLA0B01452g	YDR446W	XP_003959038.1	XP_003676966.1	XP_001645531.1	NP_985176.1	SAKL0G05742g	NA	XP_664679.1	NP_594964.1	3.16658	1.04273	1.73902	0.577328	2.17601	0.67836	1.66901	Y	up	No	No	3.82911	0.94881	2.15573	0.496104	2.61307	0.64698	1.95472	Y	up	1.61379	0.867592	0.868231	0.496104	NA	NA	NA	NA	NA	3.55597	0.951128	1.85188	0.496104	2.19366	0.649374	1.71377	Y	up	Klla0B	115562
KLLA0B01474g	YDR447C;YML024W	XP_003959037.1	XP_003676967.1;XP_003677931.1	XP_001646771.1	NP_985175.1	SAKL0G05764g	NA	XP_663583.1	NP_588012.1;NP_595245.1	2654.57	3362.68	2039.21	2634.65	2568.46	3095.79	-0.269406	N	down	No	No	2461.44	2946.28	1922.66	2121.22	2330.34	2769.77	-0.249223	N	down	2538.51	2693.51	1908.42	2121.22	2394	2542.45	-0.086776	N	down	2373	2950.88	1894.06	2121.22	2242.2	2780.01	-0.310173	N	down	Klla0B	116705
KLLA0B01496g	YDR448W	XP_003959036.1	XP_003676968.1	XP_001646770.1	NP_985174.1	SAKL0G05786g	XP_713936.1;XP_713994.1	XP_663578.1	NP_588011.1	36.5718	54.4847	30.3932	47.3405	38.2508	55.6288	-0.540546	N	down	No	No	38.9814	56.8774	34.3546	45.9913	41.6448	60.0992	-0.52379	N	down	58.2577	51.9949	49.0332	45.9913	61.5814	55.1657	0.163035	N	up	43.4036	56.9537	39.2553	45.9913	46.4739	60.3212	-0.36661	N	down	Klla0B	118526
KLLA0B01518g	YDR449C	XP_003959035.1	XP_003676969.1	XP_001646769.1	NP_985173.2	SAKL0G05830g	XP_713935.1;XP_713993.1	XP_662614.1	NP_596813.1	29.2427	74.0641	24.989	62.8518	31.1459	73.8394	-1.24645	Y	down	No	No	79.9198	62.3517	74.868	54.5895	90.6556	71.2298	0.350518	N	up	39.3923	57.0048	35.3828	54.5895	44.3946	65.3848	-0.563575	N	down	128.304	62.4607	122.981	54.5895	145.584	71.4933	1.01875	Y	up	Klla0B	119927
KLLA0B01540g	YML025C	XP_003956684.1	XP_003677932.1	XP_001645532.1	NP_985172.2	SAKL0G05852g	XP_720313.1	XP_664447.1	NP_596227.1	83.4784	115.69	46.955	70.1266	59.1134	82.396	-0.479178	N	down	No	No	262.874	176.882	177.749	110.058	215.449	143.586	0.582019	N	up	124.784	161.717	79.1734	110.058	99.2754	131.804	-0.410951	N	down	367.081	177.205	250.986	110.058	297.108	144.117	1.0398	Y	up	Klla0B	121864
KLLA0B01562g	YML026C;YDR450W	XP_003956685.1;XP_003959034.1	XP_003676970.1;XP_003677933.1	XP_001646768.1	NP_985171.1	SAKL0G05874g	XP_720312.1	XP_663045.1	NP_588057.2;NP_596506.1	3649.69	4307.63	2368.36	2917.49	2989.48	3428.24	-0.197569	N	down	No	No	3210.26	3884.81	2301.15	2576.77	2789.2	3364.69	-0.270625	N	down	3383.69	3551.52	2334.34	2576.77	2928.31	3088.54	-0.0768393	N	down	3251.16	3890.87	2388.35	2576.77	2827.58	3377.13	-0.256213	N	down	Klla0B	123623
KLLA0B01584g	YML027W;YDR451C	XP_003956686.1	XP_003677934.1	XP_001645533.1;XP_001646767.1	NP_985170.1	SAKL0G05896g	XP_720311.1	XP_662652.1	NP_593776.1;NP_595674.1	19.9636	41.5797	19.5013	41.317	24.3854	48.555	-0.994487	N	down	No	No	22.7801	26.1858	21.9271	23.6754	26.5332	30.9502	-0.194415	N	down	38.6106	23.9376	35.7694	23.6754	44.9331	28.4093	0.671007	N	up	20.7679	26.2194	20.2311	23.6754	23.9478	31.0645	-0.358199	N	down	Klla0B	125027
KLLA0B01606g	YDR452W	XP_003959033.1	XP_003676971.1	NA	NP_985169.2	SAKL0G05918g	XP_720310.1	XP_658752.1	NP_595346.1	87.7074	120.952	110.145	155.33	138.249	182.519	-0.400988	N	down	No	No	117.614	118.308	172.494	160.314	209.071	209.291	-0.00208421	N	down	106.189	108.16	149.34	160.314	187.347	192.115	-0.0365618	N	down	131.389	118.499	196.662	160.314	232.792	210.065	0.147384	N	up	Klla0B	127978
KLLA0B01628g	YML028W;YDR453C	XP_003956687.1;XP_003959032.1	XP_003676972.1;XP_003677936.1	XP_001645534.1;XP_001646766.1	NP_985168.1	SAKL0G05940g	XP_716082.1	NA	NP_588430.1	2471.4	1827.63	848.92	685.566	1073.5	805.574	0.414252	N	up	No	No	3183.59	3470.54	1040.51	1044.94	1260.99	1364.05	-0.113372	N	down	2956.02	3172.85	932.981	1044.94	1170.92	1252.1	-0.0968424	N	down	3739.52	3476.22	1248.04	1044.94	1477.43	1369.09	0.109695	N	up	Klla0B	130395
KLLA0B01650g	YML029W	XP_003956688.1	XP_003677937.1	XP_001645535.1;XP_001646765.1	NP_985167.2	SAKL0G05962g	NA	NA	NA	13.9272	18.029	22.9435	30.5854	28.7089	35.9385	-0.325199	N	down	No	No	16.8226	18.8898	31.7671	33.0978	38.4742	43.2051	-0.15733	N	down	16.33	17.2695	29.6025	33.0978	37.1405	39.6594	-0.0976854	N	down	17.8467	18.9208	34.2965	33.0978	40.6038	43.3648	-0.0996573	N	down	Klla0B	131822
KLLA0B01672g	YML030W	XP_003956689.1	XP_003677938.1	XP_001646764.1	NP_985166.1	SAKL0G05984g	XP_711166.1;XP_711187.1	XP_661435.1	NP_594467.1	427.031	347.781	97.1037	84.5996	121.74	99.3961	0.292171	N	up	No	No	642.435	425.413	158.926	95.4409	192.632	124.576	0.626661	N	up	301.356	388.924	71.3717	95.4409	89.5306	114.353	-0.354374	N	down	930.601	426.115	235.252	95.4409	278.516	125.037	1.15323	Y	up	Klla0B	134909
KLLA0B01694g	YDR454C	XP_003959031.1	XP_003676973.1	XP_001646763.1	NP_985165.1	SAKL0G06006g	XP_711167.1;XP_711188.1	XP_658999.1	NP_595074.1	389.47	598.7	130.185	212.17	164.287	249.303	-0.601602	N	down	No	No	672.752	703.402	218.999	212.192	265.447	277.057	-0.0619614	N	down	567.464	643.055	177.03	212.192	221.956	254.319	-0.195965	N	down	827.074	704.502	273.711	212.192	324.014	278.082	0.220428	N	up	Klla0B	135778
KLLA0B01738g	YDR456W	XP_003959030.1	XP_003676974.1	XP_001646762.1	NP_985164.1	SAKL0G06028g	XP_711253.1;XP_711276.1	XP_659892.1	NP_594293.2	117.744	96.6535	111.512	97.2879	141.51	114.313	0.308174	N	up	No	No	75.5501	100.126	98.5672	119.984	119.469	156.69	-0.390598	N	down	97.4312	91.5348	121.906	119.984	153	143.829	0.0896292	N	up	74.4925	100.278	99.5495	119.984	117.838	157.269	-0.415721	N	down	Klla0B	137171
KLLA0B01760g	YML031W	XP_003956690.1	XP_003677939.1	XP_001645536.1;XP_001646761.1	NP_985163.2	SAKL0G06050g	XP_711255.1;XP_711278.1	XP_662021.1	NP_594025.2	110.317	140.522	109.853	146.807	138.744	172.516	-0.314181	N	down	No	No	94.9769	128.092	124.404	155.216	150.864	202.785	-0.427848	N	down	138.414	117.098	173.523	155.216	217.807	186.14	0.228013	N	up	110.181	128.273	147.197	155.216	174.267	203.535	-0.221673	N	down	Klla0B	139684
KLLA0B01782g	YML032C	XP_003956691.1	XP_003677940.1	XP_001646760.1	NP_985162.1	SAKL0G06072g	XP_711260.1;XP_711283.1	XP_662011.1	NP_593207.1;NP_595296.1	20.8803	22.9471	17.2609	19.888	21.7456	23.3629	-0.10396	N	down	No	No	33.1441	25.082	29.2944	20.3914	35.5042	26.6168	0.41046	N	up	23.1634	22.9307	20.0377	20.3914	25.1583	24.4325	0.0350327	N	up	33.6467	25.1238	30.443	20.3914	36.0401	26.7152	0.424079	N	up	Klla0B	142413
KLLA0B01804g	YDR457W	XP_003959029.1	XP_003676975.1	XP_001646759.1	NP_985161.2	SAKL0G06094g	XP_715253.1;XP_715318.1	XP_659570.1	NP_594902.1	21.7028	20.8926	131.816	129.563	166.36	152.25	0.127972	N	up	No	No	15.9026	17.939	117.291	122.387	142.214	159.783	-0.171148	N	down	17.4491	16.4002	123.494	122.387	154.941	146.67	0.0787154	N	up	14.5114	17.9679	109.68	122.387	129.844	160.374	-0.305417	N	down	Klla0B	144223
KLLA0B01826g	YDR458C	XP_003956692.1	XP_003677941.1	XP_001646758.1	NP_985160.2	SAKL0G06116g	XP_719131.1;XP_719248.1	XP_661514.1	NP_593673.1	36.3565	54.1746	68.9916	103.726	86.165	121.876	-0.500732	N	down	No	No	54.3579	49.149	103.739	85.8663	125.766	112.031	0.161097	N	up	46.6151	44.9343	84.683	85.8663	106.243	102.839	0.0433234	N	up	46.2591	49.235	90.3864	85.8663	106.986	112.446	-0.0772134	N	down	Klla0B	155830
KLLA0B01848g	YPL222W	XP_003957857.1	XP_003673044.1	XP_001647244.1	NP_985427.2	SAKL0A03762g	XP_713951.1;XP_714009.1	XP_662714.1	NP_594740.1	42.0842	23.3808	52.5362	29.8991	66.2146	35.1321	0.914294	N	up	No	No	28.5439	24.1099	40.9517	31.5071	49.6641	41.1462	0.263867	N	up	28.3945	22.0412	38.6106	31.5071	48.5127	37.7691	0.360244	N	up	19.1424	24.1467	28.3197	31.5071	33.526	41.2982	-0.297465	N	down	Klla0B	159037
KLLA0B01870g	NA	NA	NA	NA	NA	NA	NA	NA	NA	80.968	2.20829	46.683	1.29539	58.7306	1.52215	5.26538	Y	up	Yes	No	81.065	2.35772	56.0081	1.45419	67.8874	1.90161	5.20487	Y	up	2.63416	2.15525	1.65002	1.45419	2.0665	1.74548	0.30301	N	up	100.704	2.36052	71.7778	1.45419	84.9549	1.90863	5.525	Y	up	Klla0B	161382
KLLA0B01892g	NA	XP_003957858.1	NA	NA	NP_985429.2	SAKL0A03806g	XP_714679.1	XP_657726.1	NA	17.0399	8.38951	32.8883	16.5936	41.4537	19.4993	1.08803	Y	up	Yes	No	11.5446	12.3631	25.3083	25.0939	30.6684	32.7963	-0.0799281	N	down	12.6434	11.3017	26.8088	25.0939	33.6253	30.104	0.172056	N	up	10.1697	12.3791	22.9648	25.0939	27.1826	32.9174	-0.261492	N	down	Klla0B	162844
KLLA0B01914g	YPL221W;YGL139W	XP_003955271.1;XP_003957859.1	XP_003673045.1;XP_003676345.1	XP_001647245.1	NP_985430.1	SAKL0A03828g	XP_718519.1;XP_718602.1	XP_659554.1	NP_594489.1	46.9316	61.8371	67.0866	92.851	84.7679	109.11	-0.363889	N	down	No	No	53.5824	55.3668	93.3121	87.8075	113.11	114.644	-0.0209023	N	down	51.371	50.6172	84.7381	87.8075	106.346	105.235	0.0144876	N	up	66.033	55.4557	117.041	87.8075	138.545	115.068	0.267088	N	up	Klla0B	166552
KLLA0B01936g	YGL138C	XP_003955270.1	XP_003676346.1	XP_001647246.1	NP_985431.1	SAKL0A03850g	XP_718521.1;XP_718604.1	NA	NA	107.05	3.33122	75.5885	2.5293	95.1819	2.9723	4.99925	Y	up	Yes	No	90.9044	3.69843	73.788	2.80341	89.4156	3.6583	4.59184	Y	up	3.1539	3.38137	2.40236	2.80341	3.02009	3.3581	-0.180174	N	down	144.386	3.70532	119.331	2.80341	141.25	3.67183	5.24352	Y	up	Klla0B	169003
KLLA0B01958g	YGL137W	XP_003955269.1	XP_003676347.1	XP_001647247.1	NP_985432.1	SAKL0A03872g	XP_712507.1;XP_712537.1	XP_663576.1	XP_001713153.1	76.1407	107.85	143.791	211.773	181.218	248.83	-0.457458	N	down	No	No	83.7874	96.4209	177.316	187.779	214.908	245.158	-0.190191	N	down	106.946	88.1495	216.768	187.779	272.058	225.038	0.273326	N	up	85.8533	96.5756	185.681	187.779	219.836	246.064	-0.162932	N	down	Klla0B	170646
KLLA0B01980g	YGL136C	XP_003955268.1	XP_003676348.1	XP_001647248.1	NP_985433.2	SAKL0A03894g	XP_719363.1	XP_680696.1	NP_596444.1	25.1947	67.3422	11.8981	33.1166	14.9295	38.9056	-1.38312	Y	down	No	No	51.5911	55.2179	27.6156	27.3312	33.4526	35.6785	-0.0846377	N	down	45.267	50.4814	23.505	27.3312	29.4733	32.7504	-0.15309	N	down	71.1285	55.3079	38.3842	27.3312	45.4365	35.8104	0.337781	N	up	Klla0B	173710
KLLA0B02002g	YGL135W;YPL220W	XP_003959507.1	XP_003673046.1	XP_001647249.1	NP_985434.1	SAKL0A03916g	XP_712505.1;XP_712535.1	XP_658726.1	NP_587891.1;NP_596267.1	7728.45	8573.68	3471.28	4218.28	4396.06	4956.37	-0.173065	N	down	No	No	7747.97	10575.8	3051.87	3844.17	3698.35	5019.78	-0.440689	N	down	9071.83	9668.46	3426.22	3844.17	4298.95	4607.79	-0.10008	N	down	7529.64	10592.3	3032.45	3844.17	3590.42	5038.33	-0.488772	N	down	Klla0B	175242
KLLA0B02024g	YGL134W;YPL219W	XP_003959508.1;XP_003959729.1	XP_003673047.1;XP_003676349.1	XP_001642296.1	NP_985435.1	SAKL0A03938g	NA	NA	NA	156.835	123.858	130.138	108.219	166.59	127.164	0.389847	N	up	No	No	115.319	102.538	129.168	106.834	156.712	139.469	0.163034	N	up	111.263	93.7422	119.207	106.834	149.575	128.023	0.223535	N	up	97.5826	102.704	112.024	106.834	132.579	139.984	-0.0801265	N	down	Klla0B	176585
KLLA0B02046g	YPL218W	XP_003959509.1	XP_003673048.1	XP_001647250.1	NP_985436.1	SAKL0A03960g	XP_712502.1;XP_712532.1	XP_658015.1	NP_596568.1	772.618	728.377	250.809	247.704	315.995	291.052	0.118623	N	up	No	No	737.298	908.588	238.691	273.495	289.256	357.174	-0.303408	N	down	858.398	830.63	267.898	273.495	336.188	327.859	0.036472	N	up	688.695	909.975	228.981	273.495	271.117	358.494	-0.402428	N	down	Klla0B	178646
KLLA0B02068g	YPL217C	XP_003959510.1	XP_003673049.1	XP_001647251.1	NP_985437.2	SAKL0A03982g	XP_718522.1;XP_718605.1	XP_663938.1	NP_595102.2	17.2444	47.8466	44.1545	124.873	55.1034	146.709	-1.41322	Y	down	No	No	35.8662	31.9077	92.0371	75.3056	111.464	98.194	0.181424	N	up	17.9521	29.1729	44.3311	75.3056	55.5543	90.1377	-0.70095	N	down	56.1605	31.97	146.946	75.3056	173.978	98.5574	0.813028	N	up	Klla0B	179493
KLLA0B02090g	YGL133W	XP_003959728.1	XP_003676350.1	XP_001647252.1	NP_985438.2	SAKL0A04004g;SAKL0A04004g	XP_719075.1;XP_719192.1	XP_680572.1;XP_680572.1;XP_680572.1	NA	25.8131	36.8366	54.3894	78.5656	68.3537	92.319	-0.433913	N	down	No	No	26.6957	27.725	65.7605	62.5858	79.6847	81.7186	-0.0331359	N	down	25.4719	25.3464	59.8595	62.5858	75.0628	75.0118	0.00196906	N	up	27.7318	27.7684	69.6362	62.5858	82.4418	82.0207	0.00740926	N	up	Klla0B	183718
KLLA0B02112g	YPL215W	XP_003959512.1	XP_003673051.1	XP_001647253.1	NP_985439.2	SAKL0A04026g	XP_719080.1;XP_719197.1	XP_663417.1	NP_588073.1	283.298	221.142	157.664	129.973	198.692	152.701	0.379808	N	up	No	No	356.701	310.22	231.308	185.826	280.36	242.583	0.208117	N	up	216.885	283.612	133.768	185.826	167.845	222.674	-0.408328	N	down	458.033	310.734	301.941	185.826	357.487	243.479	0.55336	N	up	Klla0B	187461
KLLA0B02134g	YPL214C	XP_003959513.1	XP_003673052.1	XP_001647254.1	NP_985440.1	SAKL0A04048g	XP_719975.1;XP_720107.1	NA	NP_593396.1	17.3967	22.2313	17.3364	23.3266	21.805	27.4125	-0.330694	N	down	No	No	17.8949	20.0222	19.6171	20.0654	23.8005	26.2243	-0.146602	N	down	21.9291	18.3033	23.0556	20.0654	28.9481	24.0715	0.277159	N	up	19.8733	20.0483	21.7861	20.0654	25.7904	26.3212	-0.0113377	N	down	Klla0B	188671
KLLA0B02156g	YPL213W	XP_003959514.1	XP_003673053.1	XP_001647255.1	NP_985441.1	SAKL0A04070g	XP_716513.1;XP_716568.1	XP_657815.1	NP_596725.1	36.6833	39.2286	14.2526	15.6349	17.959	18.3711	-0.0329319	N	down	No	No	54.0486	50.3382	24.5065	20.6662	29.6894	26.9819	0.146969	N	up	40.8064	46.0202	17.4102	20.6662	21.8108	24.7675	-0.180034	N	down	55.2138	50.42	25.1336	20.6662	29.7561	27.0816	0.134194	N	up	Klla0B	190619
KLLA0B02178g	YGL131C	XP_003959727.1	XP_003676351.1	XP_001647256.1	NP_985442.2	SAKL0A04092g	XP_716512.1;XP_716512.1;XP_716512.1;XP_716512.1;XP_716567.1;XP_716567.1;XP_716567.1;XP_716567.1	XP_868899.1	NP_593554.1	12.1952	13.1539	36.1798	39.7108	45.2946	46.6601	-0.0437047	N	down	No	No	13.0197	12.652	44.0769	39.4535	53.4178	51.5262	0.0566298	N	up	10.7293	11.5663	35.2004	39.4535	44.175	47.2971	-0.0963595	N	down	12.3813	12.671	42.8063	39.4535	50.6775	51.7166	-0.0255442	N	down	Klla0B	191448
KLLA0B02200g	YGL130W	XP_003959726.1	XP_003676352.1	XP_001642298.1	NP_985443.1	SAKL0A04114g	XP_716514.1;XP_716569.1	XP_680742.1	NP_595708.1	72.0415	59.038	57.5145	49.1108	72.7532	57.699	0.334695	N	up	No	No	68.612	62.5361	66.4377	56.0297	80.5304	73.1757	0.139679	N	up	55.1666	57.1698	50.4106	56.0297	63.2561	67.1697	-0.0846606	N	down	62.4824	62.6288	61.4002	56.0297	72.6833	73.4462	-0.0124708	N	down	Klla0B	196341
KLLA0B02222g	YGL129C	XP_003959725.1	XP_003676353.1	XP_001642299.1	NP_985444.2	SAKL0A04136g	XP_712519.1;XP_712549.1	XP_661348.1	NP_595843.1	78.0273	101.478	57.2481	77.9844	71.9538	91.6312	-0.349036	N	down	No	No	219.017	137.397	195.671	112.823	237.112	147.22	0.685759	N	up	94.3517	125.615	81.002	112.823	101.619	135.139	-0.413608	N	down	289.58	137.639	264.209	112.823	312.768	147.764	1.07854	Y	up	Klla0B	197850
KLLA0B02244g	YPL212C	XP_003959515.1	XP_003673054.1	XP_001642300.1	NP_985445.2	SAKL0A04158g	XP_712516.1;XP_712546.1	XP_663769.1	NP_588446.1	35.7252	70.1499	41.3465	83.6553	51.9009	98.2885	-0.921727	N	down	No	No	73.1437	76.3061	85.6448	82.8351	103.783	108.119	-0.059563	N	down	53.4838	69.7613	60.6698	82.8351	76.0849	99.2461	-0.384524	N	down	91.1622	76.4335	108.423	82.8351	128.372	108.519	0.239607	N	up	Klla0B	199514
KLLA0B02266g	YPL211W	XP_003959516.1	XP_003673055.1	XP_001644847.1	NP_985446.1	SAKL0A04180g	XP_712517.1;XP_712547.1	XP_681760.1	NP_587718.1	146.664	283.402	35.9852	74.9334	45.2835	88.0364	-0.959147	N	down	No	No	300.361	279.222	91.1358	78.3789	110.452	102.261	0.107108	N	up	153.593	255.279	44.1193	78.3789	55.2741	93.8699	-0.76464	N	down	399.573	279.716	124.122	78.3789	146.958	102.639	0.512605	N	up	Klla0B	201752
KLLA0B02288g	YPL210C	XP_003959517.1	XP_003673056.1	XP_001644848.1	NP_985447.1	SAKL0A04202g	XP_719081.1;XP_719198.1	XP_659618.1	NP_587719.1	96.4185	139.386	119.481	177.282	149.958	208.301	-0.474323	N	down	No	No	126.213	133.501	171.055	167.735	207.41	219.005	-0.0803678	N	down	122.124	122.049	158.708	167.735	199.163	201.031	-0.0136747	N	down	129.464	133.714	179.568	167.735	212.59	219.814	-0.0483624	N	down	Klla0B	202601
KLLA0B02310g	YGL064C	XP_003959723.1	XP_003676355.1	XP_001647257.1	NP_985448.1	SAKL0A04224g	XP_712520.1;XP_712550.1	XP_663753.1	NA	12.009	30.7066	14.2311	36.8923	17.836	43.3459	-1.28237	Y	down	No	No	34.6666	22.7152	42.5295	25.6531	51.53	33.4681	0.615793	N	up	21.5721	20.7675	25.1293	25.6531	31.5366	30.7218	0.0267499	N	up	50.7782	22.7558	63.1986	25.6531	74.8183	33.5919	1.1405	Y	up	Klla0B	205046
KLLA0B02332g	YPL209C	XP_003959518.1	XP_003674905.1	XP_001644849.1	NP_985449.1	SAKL0A04246g	XP_712513.1;XP_712543.1	XP_663419.1	NP_001018849.1	11.3707	12.0184	7.23993	7.73151	9.00698	9.08646	-0.0156834	N	down	No	No	16.7892	14.0073	12.0795	9.5666	14.635	12.493	0.244744	N	up	14.8433	12.8054	10.6069	9.5666	13.3169	11.4677	0.216256	N	up	14.0814	14.0283	10.537	9.5666	12.4757	12.5392	-0.00155745	N	down	Klla0B	206863
KLLA0B02354g	YPL208W	XP_003959519.1	XP_003673057.1	XP_001647258.1	NP_985450.2	SAKL0A04268g	XP_716460.1	XP_663234.1	NP_595446.1	10.5758	18.5171	10.8027	18.7353	13.4146	22.0168	-0.71709	N	down	No	No	17.4113	16.7725	21.7976	19.3628	26.3912	25.2909	0.0861442	N	up	15.3159	15.3332	18.1474	19.3628	22.7653	23.215	-0.0215307	N	down	18.689	16.7974	23.9463	19.3628	28.3517	25.3843	0.168459	N	up	Klla0B	208684
KLLA0B02376g	NA	NA	XP_003673058.1	XP_001647259.1	NA	SAKL0A04290g	NA	NA	NA	1100.8	703.007	185.463	126.285	233.097	148.39	0.651438	N	up	No	No	727.269	941.332	130.808	153.81	158.63	200.976	-0.341932	N	down	967.509	860.525	167.652	153.81	210.265	184.479	0.190791	N	up	748.704	942.593	136.848	153.81	162.041	201.719	-0.313197	N	down	Klla0B	210877
KLLA0B02398g	NA	NA	NA	NA	NA	SAKL0A04312g	XP_719162.1;XP_719276.1	XP_658062.1	NA	44.2496	48.8849	32.6398	36.4433	40.9918	42.827	-0.0637161	N	down	No	No	52.0133	48.6722	43.9825	38.5474	53.3279	50.3386	0.0785656	N	up	47.1129	44.4962	39.0885	38.5474	49.0074	46.2071	0.0879784	N	up	58.7874	48.7472	51.3972	38.5474	60.8336	50.5247	0.268883	N	up	Klla0B	211618
KLLA0B02420g	YGL065C	XP_003959722.1	XP_003676356.1	XP_001647260.1	NP_985452.1	SAKL0A04334g	XP_710571.1;XP_710581.1	XP_664478.1	NP_595621.3	90.8095	57.832	77.4758	51.5537	98.3051	60.5834	0.698769	N	up	No	No	61.2305	63.1932	64.4926	61.5339	78.1915	80.34	-0.0440465	N	down	55.6847	57.7723	56.1434	61.5339	70.4458	73.7465	-0.0666003	N	down	59.0441	63.2948	63.4532	61.5339	75.1216	80.637	-0.10295	N	down	Klla0B	213115
KLLA0B02442g	YGL066W	XP_003959721.1	XP_003676357.1	XP_001647261.1	NP_985453.1	SAKL0A04356g	XP_712512.1;XP_712542.1	NA	NP_588447.1	23.2757	18.3436	23.8565	19.5374	30.0819	22.953	0.389996	N	up	No	No	34.5672	32.9666	34.9777	30.9104	42.3959	40.3684	0.0730383	N	up	26.4991	30.1379	25.7686	30.9104	32.3193	37.0551	-0.193285	N	down	36.8035	33.0166	37.8786	30.9104	44.8456	40.5176	0.151008	N	up	Klla0B	214743
KLLA0B02464g	YPL206C	XP_003959521.1	XP_003673059.1	XP_001647262.1	NP_985454.1	SAKL0A04378g	XP_712522.1;XP_712552.1	NA	NP_594955.2	51.2761	28.6451	28.5062	16.5696	35.8938	19.4729	0.882105	N	up	No	No	51.9807	38.851	32.4469	21.9945	39.3337	28.7417	0.462385	N	up	48.1783	35.5157	29.1285	21.9945	36.5495	26.3824	0.482011	N	up	44.4516	38.9023	28.2044	21.9945	33.398	28.8479	0.228021	N	up	Klla0B	216794
KLLA0B02519g	YKL189W	XP_003958509.1	XP_003673218.1	XP_001643974.1	NP_984953.1	SAKL0G16324g	XP_720920.1;XP_721041.1	XP_660699.1	NP_594685.1	23.6538	29.6014	15.2638	19.8242	19.1737	23.2953	-0.281733	N	down	No	No	37.0255	37.0583	26.7792	25.4959	32.4787	33.285	-0.0516345	N	down	29.6008	33.8799	20.9382	25.4959	26.2759	30.5533	-0.220486	N	down	42.6727	37.1206	31.8818	25.4959	37.7391	33.4081	0.171301	N	up	Klla0B	219931
KLLA0B02541g	YLR417W	XP_003955146.1	XP_003678488.1	XP_001646554.1	NP_984952.1	SAKL0G16302g	XP_720919.1;XP_721040.1	NA	NP_596667.1	30.7654	25.7785	27.425	23.1302	34.5327	27.1833	0.345109	N	up	No	No	32.537	26.226	34.8874	25.7886	42.3037	33.6779	0.322854	N	up	25.6553	23.9756	26.5314	25.7886	33.2771	30.9137	0.109806	N	up	34.3579	26.2654	37.3127	25.7886	44.1672	33.8023	0.388302	N	up	Klla0B	221104
KLLA0B02563g	YKL188C	XP_003958508.1	XP_003673217.1	XP_001646555.1	NP_984951.1	SAKL0G16280g	XP_716324.1;XP_716386.1	XP_658618.1	NA	15.4846	2.13886	21.2763	2.94908	26.7779	3.46517	2.94802	Y	up	Yes	No	9.55788	2.44082	16.8348	3.96314	20.4115	5.17982	1.99763	Y	up	1.52014	2.23123	2.5154	3.96314	3.15255	4.7546	-0.558143	N	down	10.7886	2.44381	19.5955	3.96314	23.2036	5.19895	2.19121	Y	up	Klla0B	222951
KLLA0B02585g	YLR414C	XP_003955145.1	XP_003678487.1	XP_001646556.1	NA	SAKL0G16258g	XP_719722.1;XP_719839.1	XP_662817.1	NP_594296.1	206.248	214.804	84.5556	92.4156	106.351	108.58	-0.0301353	N	down	No	No	222.409	213.017	108.604	96.5952	131.604	126.136	0.0633788	N	up	173.831	194.741	82.5124	96.5952	103.613	115.784	-0.160772	N	down	193.641	213.346	97.4938	96.5952	115.446	126.602	-0.131927	N	down	Klla0B	226764
KLLA0B02607g	YLR413W;YKL187C	XP_003955144.1;XP_003958507.1	XP_003673216.1;XP_003678486.1	XP_001646557.1	NP_984950.1	SAKL0G16236g	NA	NA	NA	242.025	734.899	311.039	1005.75	392.401	1181.83	-1.59058	Y	down	No	Yes	205.796	304.135	307.582	418.049	372.788	545.469	-0.549811	N	down	343.415	278.056	490.97	418.049	616.452	500.709	0.299272	N	up	398.903	304.674	606.039	418.049	717.485	547.487	0.389184	N	up	Klla0B	228049
KLLA0B02629g	YKL186C	XP_003958506.1	XP_003673215.1	XP_001643975.1	NP_984949.1	SAKL0G16214g	NA	NA	NA	86.113	146.216	24.7398	43.2626	30.9095	50.8321	-0.718991	N	down	No	No	137.774	140.64	40.4922	37.9166	49.077	49.5215	-0.00887047	N	down	123.214	128.571	33.9266	37.9166	42.5661	45.4569	-0.0913192	N	down	156.633	140.847	45.616	37.9166	53.9957	49.7046	0.123138	N	up	Klla0B	231874
KLLA0B02651g	YKL185W	XP_003958505.1	XP_003673214.1;XP_003673214.1;XP_003673214.1;XP_003673214.1	XP_001646558.1;XP_001646558.1	NP_984948.2	SAKL0G16192g	XP_717067.1;XP_717146.1	XP_661211.1	NA	30.2612	19.571	26.9811	18.5403	34.1516	21.7817	0.649108	N	up	No	No	16.5905	26.3621	16.2948	23.1292	19.7493	30.2234	-0.601013	N	down	24.3526	24.0989	22.4306	23.1292	28.1117	27.7424	0.0304276	N	up	23.801	26.3965	23.1403	23.1292	27.3925	30.335	-0.132923	N	down	Klla0B	233553
KLLA0B02673g	YKL184W	XP_003958504.1	XP_003673213.1	XP_001646559.1	NP_984947.2	SAKL0G16170g	XP_718892.1;XP_718994.1	XP_661450.1	NP_594665.1	114.872	138.037	88.4988	110.868	110.454	130.256	-0.238224	N	down	No	No	93.0723	80.8003	82.974	66.5653	100.505	86.8468	0.210534	N	up	57.7767	73.8728	49.3172	66.5653	61.9532	79.7205	-0.369121	N	down	94.5849	80.948	85.7045	66.5653	101.488	87.168	0.213876	N	up	Klla0B	235478
KLLA0B02695g	YKL183W	XP_003958503.1	XP_003673212.1	XP_001646560.1	NP_984946.2	SAKL0G16148g	XP_721221.1;XP_721493.1	XP_868863.1	NA	18.2614	25.8843	8.72045	12.8444	10.9313	15.0928	-0.466849	N	down	No	No	30.6177	20.9276	17.6559	10.9533	21.3867	14.2924	0.581858	N	up	19.4596	19.1331	10.6952	10.9533	13.4221	13.1196	0.0185193	N	up	38.8266	20.9645	22.7333	10.9533	26.9125	14.3453	0.888767	N	up	Klla0B	237221
KLLA0B02717g	YKL182W	XP_003955143.1	XP_003678485.1	XP_001646561.1	NP_984945.2	SAKL0G16104g	XP_716817.1;XP_716877.1	XP_682677.1	NP_594370.1	188.72	405.082	837.673	1921.18	1058.12	2257.65	-1.0933	Y	down	No	No	172.596	225.777	802.249	968.873	972.244	1264.28	-0.379128	N	down	180.744	206.416	804.964	968.873	1011.32	1160.54	-0.198846	N	down	222.564	226.171	1053.52	968.873	1247.15	1268.96	-0.0254071	N	down	Klla0B	240125
KLLA0B02739g	YLR412W	XP_003955142.1	XP_003676480.1	XP_001646562.1	NP_984944.1	SAKL0G16082g	XP_716808.1;XP_716868.1	XP_659986.1	NP_595916.1	16.9669	22.1421	8.30446	11.1018	10.375	13.0426	-0.331927	N	down	No	No	45.4945	25.0664	25.217	12.7808	30.5652	16.6684	0.850705	N	up	14.9267	22.918	7.93378	12.7808	9.93376	15.3008	-0.629465	N	down	43.5015	25.115	24.8281	12.7808	29.3901	16.73	0.78507	N	up	Klla0B	246730
KLLA0B02783g	YKL181W	XP_003958502.1	XP_003673211.1	XP_001643976.1;XP_001646563.1	NP_984943.1	SAKL0G16060g	XP_716807.1;XP_716867.1	XP_664315.1	NP_593826.1	183.289	293.418	162.139	270.668	203.118	318.013	-0.64687	N	down	No	No	309.117	299.184	266.683	238.927	323.15	311.711	0.0511279	N	up	208.699	273.533	173.038	238.927	217.02	286.133	-0.399899	N	down	407.184	299.73	359.618	238.927	425.764	312.864	0.442737	N	up	Klla0B	248299
KLLA0B02805g	YLR410W	XP_003955141.1	XP_003678483.1	XP_001646564.1	NP_984942.1	SAKL0G16016g	XP_716818.1;XP_716878.1	XP_663401.1;XP_663401.1;XP_663401.1;XP_663401.1	NP_587877.1	56.6418	40.014	130.565	95.4018	165.291	112.098	0.560433	N	up	No	No	44.6311	64.3014	111.362	148.616	134.988	194.095	-0.523726	N	down	69.775	58.7839	168.127	148.616	210.986	178.165	0.244572	N	up	41.8518	64.3978	107.217	148.616	126.912	194.813	-0.617411	N	down	Klla0B	250482
KLLA0B02827g	YLR409C	XP_003955150.1	XP_003678482.1	XP_001646565.1	NP_984941.2	SAKL0G15994g	XP_722467.1;XP_722608.1	XP_681562.1	NP_587878.1	28.3203	45.2581	47.1457	79.0507	59.8053	92.8815	-0.634453	N	down	No	No	42.9369	47.4601	87.5632	89.7025	106.104	116.996	-0.14417	N	down	23.7861	43.3917	46.8399	89.7025	58.7216	107.396	-0.873508	N	down	58.7653	47.5495	121.938	89.7025	144.353	117.428	0.292103	N	up	Klla0B	254447
KLLA0B02849g	YDL077C	XP_003958501.1	XP_003673210.1	XP_001646566.1	NP_984940.1	SAKL0G15972g	XP_722469.1;XP_722610.1	NA	NP_593392.1	26.9468	28.755	44.7917	49.4529	56.5483	58.1123	-0.0391413	N	down	No	No	19.6798	23.5662	43.2078	47.1952	52.4057	61.607	-0.246652	N	down	18.591	21.5448	38.4216	47.1952	48.1927	56.5511	-0.232432	N	down	19.8852	23.605	44.1924	47.1952	52.332	61.8348	-0.242833	N	down	Klla0B	257299
KLLA0B02871g	YLR408C	XP_003955151.1	XP_003678481.1	XP_001646567.1	NP_984939.1	SAKL0G15950g	XP_714930.1;XP_714993.1	NA	NA	83.4882	86.0631	9.20178	9.40442	11.4955	11.053	0.0547449	N	up	No	No	117.015	118.202	13.0942	12.4807	15.8639	16.2923	-0.0304752	N	down	129.881	108.068	13.7103	12.4807	17.2072	14.9552	0.196212	N	up	141.384	118.415	16.1119	12.4807	19.0712	16.3525	0.213446	N	up	Klla0B	260566
KLLA0B02893g	YLR407W	XP_003955152.1	XP_003678480.1	XP_001643977.1	NP_984938.1	SAKL0G15928g	XP_714928.1;XP_714991.1	XP_663866.1	XP_002742505.1	67.3251	38.7048	30.3838	18.4836	38.647	21.7206	0.832287	N	up	No	No	109.638	105.926	46.2108	41.2001	56.0208	53.7863	0.0527829	N	up	77.8502	96.8398	32.06	41.2001	40.2245	49.3722	-0.297323	N	down	106.39	106.097	46.1113	41.2001	54.5912	53.9852	0.013462	N	up	Klla0B	261089
KLLA0B02915g	YDL076C	XP_003958500.1	XP_003673201.1	XP_001646568.1	NP_984937.1	SAKL0G15906g	XP_714927.1;XP_714990.1	XP_663884.1	NP_588063.1	51.8882	70.7882	30.6537	43.3702	38.6923	50.962	-0.397115	N	down	No	No	60.8672	84.4649	39.3049	49.9586	47.6588	65.2588	-0.456491	N	down	82.0084	77.2161	50.992	49.9586	63.9703	59.9024	0.0989487	N	up	45.8102	84.5869	30.5896	49.9586	36.2063	65.5	-0.850891	N	down	Klla0B	262455
KLLA0B02937g	YLR406C;YDL075W	XP_003958499.1	XP_003673202.1	XP_001646569.1;XP_001647214.1	NP_984936.2	SAKL0G15884g	NA	NA	NP_594826.1	2045.63	3217.92	1219.69	1948.03	1538.87	2289.02	-0.572852	N	down	No	No	1825.3	2093.85	1438.13	1524.12	1742.53	1990.04	-0.191457	N	down	1819.87	1914.21	1397.33	1524.12	1752.6	1826.72	-0.0597277	N	down	1815.6	2097.11	1475.23	1524.12	1746.44	1997.4	-0.193708	N	down	Klla0B	264277
KLLA0B02959g	YLR405W	XP_003955153.1	XP_003678478.1	XP_001646570.1	NP_984935.1	SAKL0G15840g	XP_716804.1;XP_716864.1	NA	NP_588262.1	18.6067	21.1685	11.3002	13.1143	14.0419	15.4072	-0.135766	N	down	No	No	36.9567	27.0958	25.6858	17.1656	31.1123	22.4151	0.487727	N	up	19.2235	24.7708	12.8221	17.1656	16.0842	20.5754	-0.352544	N	down	42.5679	27.1368	30.2166	17.1656	35.7691	22.498	0.670046	N	up	Klla0B	266267
KLLA0B02981g	YDL074C	XP_003958498.1	XP_003673204.1	XP_001646571.1	NP_984934.1	SAKL0G15818g	XP_716814.1;XP_716874.1	XP_664178.1	NP_587845.1;NP_588497.1	21.027	34.8978	32.8599	54.5993	40.9788	64.1548	-0.647667	N	down	No	No	51.2197	39.1968	72.8671	51.6837	88.3037	67.4536	0.385629	N	up	31.7579	35.8352	44.0053	51.6837	55.2041	61.9181	-0.169018	N	down	62.5692	39.2635	91.549	51.6837	108.374	67.703	0.673096	N	up	Klla0B	267798
KLLA0B03003g	YDL073W	XP_003958497.1	XP_003673205.1	XP_001647215.1	NP_984933.2	SAKL0G15796g	XP_711138.1;XP_711156.1	XP_663543.1	NA	86.2468	56.9669	149.908	100.59	189.288	118.176	0.679626	N	up	No	No	74.5729	57.0123	164.425	116.038	199.334	151.348	0.392996	N	up	33.7615	52.125	71.4069	116.038	89.4469	138.93	-0.636101	N	down	63.1935	57.1192	141.889	116.038	167.954	151.908	0.140527	N	up	Klla0B	270824
KLLA0B03025g	YLR404W	XP_003955154.1	XP_003678477.1	XP_001647216.1	NP_984932.2	SAKL0G15774g	XP_711882.1;XP_711911.1;XP_714676.1;XP_714676.1	NA	NA	73.7551	30.3112	26.7707	11.1239	33.7461	13.0702	1.36803	Y	up	No	No	54.462	42.1685	23.0986	16.0565	27.9799	20.9788	0.439646	N	up	38.4223	38.5484	15.196	16.0565	19.0579	19.2568	-0.00224544	N	down	45.6028	42.2241	19.6744	16.0565	23.2928	21.0563	0.16209	N	up	Klla0B	274064
KLLA0B03047g	YLR403W	XP_003955155.1	XP_003673206.1;XP_003678476.1	XP_001646572.1	NP_984931.2	SAKL0G15752g	XP_723017.1;XP_723164.1	XP_658421.1	NP_594573.1	111.938	110.942	133.004	139.473	169.507	163.887	0.0488948	N	up	No	No	64.5891	89.607	95.4684	122.499	115.78	160.032	-0.469138	N	down	94.9885	81.9163	134.522	122.499	168.89	146.897	0.202662	N	up	70.6625	89.7335	106.91	122.499	126.579	160.624	-0.340663	N	down	Klla0B	275298
KLLA0B03069g	YLR401C	XP_003955156.1	XP_003678475.1	XP_001643460.1	NP_984930.1	SAKL0G15730g	XP_722466.1;XP_722607.1	XP_658422.1	NP_594572.1	20.9557	48.1035	28.456	67.4873	35.5091	79.2903	-1.15985	Y	down	No	No	61.6375	49.1799	88.9571	65.7359	107.798	85.7952	0.327605	N	up	39.1106	44.9619	54.1628	65.7359	67.919	78.7545	-0.215268	N	down	91.8638	49.2625	134.457	65.7359	159.209	86.1124	0.88305	N	up	Klla0B	278510
KLLA0B03091g	YDL072C	XP_003958496.1	XP_003673207.1	XP_001646573.1	NP_984929.1	SAKL0G15708g	XP_722465.1;XP_722606.1	XP_658423.1	NP_594577.1	322.659	234.984	106.428	80.4212	133.84	94.5107	0.501863	N	up	No	No	222.619	186.887	96.7776	75.0771	117.299	98.1529	0.263056	N	up	250.443	170.838	104.117	75.0771	130.665	90.0948	0.541769	N	up	173.591	187.112	77.2072	75.0771	91.4012	98.5153	-0.101129	N	down	Klla0B	280664
KLLA0B03113g	YLR399C	XP_003955157.1	XP_003678474.1	XP_001646574.1	NP_984928.2	SAKL0G15686g	XP_716816.1;XP_716876.1	XP_659588.1	NP_588301.2;NP_593620.3	41.7905	60.3322	56.7472	85.9023	72.0452	100.94	-0.486053	N	down	No	No	44.038	59.1099	62.7542	77.5666	76.0639	101.324	-0.41096	N	down	66.7055	54.0372	90.6209	77.5666	113.766	93.0072	0.292582	N	up	47.6071	59.1958	69.6684	77.5666	82.452	101.698	-0.300145	N	down	Klla0B	282503
KLLA0B03135g	YOR320C	XP_003955793.1	XP_003674556.1;XP_003675428.1	XP_001643797.1	NA	SAKL0B06248g	XP_714895.1;XP_714958.1	XP_681252.1;XP_682156.1;XP_682156.1;XP_682156.1;XP_682156.1	NP_592825.1;NP_596296.1;NP_596297.1	64.0372	108.184	60.8386	105.561	76.1185	124.039	-0.704919	N	down	No	No	99.1157	119.192	95.3296	105.093	115.51	137.199	-0.246611	N	down	102.494	108.967	94.9469	105.093	119.144	125.94	-0.0809157	N	down	102.877	119.385	100.536	105.093	118.999	137.707	-0.212093	N	down	Klla0B	285346
KLLA0B03157g	YEL004W	NA	NA	NA	NA	SAKL0F04928g	XP_714554.1;XP_714650.1	XP_682144.1	NP_595426.1	181.1	191.821	88.9216	98.3336	112.485	115.55	-0.0385849	N	down	No	No	117.637	111.22	80.5477	69.1668	97.5879	90.3303	0.117127	N	up	115.174	101.677	74.078	69.1668	92.955	82.9164	0.166255	N	up	179.574	111.389	125.208	69.1668	148.2	90.6642	0.710422	N	up	Klla0B	287677
KLLA0B03179g	YLR398C	XP_003955158.1	XP_003678473.1	XP_001646575.1	NP_984927.2	SAKL0H02706g	XP_716180.1;XP_716263.1	XP_663611.1	NP_588095.1	15.6127	16.8811	30.8569	33.5153	38.618	39.3841	-0.0292456	N	down	No	No	18.8416	17.9975	42.0689	37.0108	50.9972	48.3051	0.0697516	N	up	16.3236	16.4538	35.0855	37.0108	44.0139	44.341	-0.0149735	N	down	17.9127	18.0276	40.8526	37.0108	48.3627	48.4837	-0.0109515	N	down	Klla0B	289199
KLLA0B03212g	NA	XP_003958495.1	XP_003673208.1	XP_001646576.1	NP_984926.1	SAKL0H02728g	NA	NA	NA	37.9011	63.5139	9.85061	16.7579	12.2651	19.6944	-0.68546	N	down	No	No	67.0925	56.655	21.8052	17.2584	26.4327	22.5283	0.220772	N	up	46.7114	51.7961	14.1083	17.2584	17.6875	20.6795	-0.226783	N	down	66.9307	56.7515	21.9728	17.2584	26.0126	22.6116	0.194989	N	up	Klla0B	293080
KLLA0B03234g	YLR397C	XP_003955159.1	XP_003678472.1	XP_001643459.1	NP_984925.2	SAKL0H02750g	XP_716187.1;XP_716270.1	NA	NP_596710.1	6.52248	14.0589	11.2408	24.7617	14.1988	29.0947	-1.0338	Y	down	No	No	19.8418	16.3675	35.0339	26.1785	42.4471	34.1348	0.304376	N	up	8.64317	14.9647	14.6165	26.1785	18.3341	31.3343	-0.784249	N	down	23.0419	16.3994	41.2507	26.1785	48.8264	34.2612	0.492175	N	up	Klla0B	293919
KLLA0B03267g	YLR396C	XP_003955160.1	XP_003678471.1	XP_001643458.1	NP_984924.1	SAKL0H02772g	XP_710907.1;XP_710922.1	XP_660022.1	NP_596210.1	37.2303	39.3722	43.5552	46.1747	54.8364	54.2563	0.0151038	N	up	No	No	41.283	38.5125	57.5016	49.1212	69.6997	64.1553	0.121451	N	up	35.5784	35.208	47.4402	49.1212	59.5691	58.8896	0.0174041	N	up	37.8738	38.5709	53.2607	49.1212	63.0467	64.3924	-0.0271928	N	down	Klla0B	296600
KLLA0B03289g	YDL067C	XP_003958494.1	XP_003673209.1	XP_001646577.1	NP_984923.1	SAKL0H02794g	NA	NA	NP_588061.1	11552.5	8583.56	220.519	173.555	277.865	203.947	0.446202	N	up	No	No	8689.33	7805.44	218.135	181.25	264.481	236.642	0.159042	N	up	6991.75	7135.76	166.688	181.25	209.108	217.221	-0.0549631	N	down	8124	7817.54	208.136	181.25	246.399	237.517	0.0526492	N	up	Klla0B	299377
KLLA0B03311g	YLR395C	XP_003955161.1	XP_003678470.1	XP_001646578.1	NP_984922.1	SAKL0H02816g	NA	NA	NP_594028.1	4340.03	2544.59	262.606	166.612	330.711	195.788	0.756282	N	up	No	No	7068.27	5252.71	334.342	231.204	405.327	301.892	0.424558	N	up	4110.42	4802.04	189.955	231.204	238.361	277.115	-0.217324	N	down	6746.54	5260.85	330.39	231.204	391.145	303.008	0.368412	N	up	Klla0B	300590
KLLA0B03333g	YLR394W	XP_003955162.1	XP_003678469.1	XP_001643457.1	NA	SAKL0H02838g	XP_710905.1;XP_710920.1	XP_661910.1	NP_593782.1	10.5441	4.7811	5.79454	2.73006	7.32859	3.20768	1.19112	Y	up	No	No	6.32044	3.68901	3.78291	2.07826	4.58399	2.71188	0.744277	N	up	1.86975	3.37274	1.2178	2.07826	1.53065	2.48935	-0.728368	N	down	4.49658	3.6958	2.7791	2.07826	3.28991	2.72191	0.250336	N	up	Klla0B	301536
KLLA0B03355g	YLR174W;YDL066W;YNL009W	XP_003958493.1;XP_003958861.1;XP_003959128.1	XP_003673200.1;XP_003673811.1;XP_003677601.1	XP_001646497.1;XP_001646579.1	NP_982520.1;NP_984921.1	SAKL0D08426g;SAKL0H02860g	XP_710904.1;XP_710919.1;XP_713421.1	XP_660603.1	NP_594105.2	389.259	60.2709	327.809	54.0719	414.426	63.532	2.7055	Y	up	Yes	No	167.106	94.7359	146.771	76.643	177.912	100.08	0.82968	N	up	82.8272	86.608	69.5507	76.643	87.2631	91.8659	-0.0736291	N	down	64.1554	94.8832	57.9216	76.643	68.5458	100.45	-0.552124	N	down	Klla0B	303444
KLLA0B03377g	YPR183W	XP_003955466.1	XP_003674459.1	XP_001646219.1	NP_984585.1	SAKL0F16104g	XP_717537.1;XP_717611.1	XP_662551.1	NP_594017.1	676.081	514.689	329.197	274.038	416.773	322.001	0.372264	N	up	No	No	514.836	686.153	253.13	311.363	306.841	406.661	-0.406254	N	down	709.464	627.275	334.823	311.363	420.17	373.283	0.171068	N	up	451.232	687.179	227.549	311.363	269.457	408.164	-0.598315	N	down	Klla0B	305323
KLLA0B03432g	YPR185W	XP_003955464.1	XP_003674462.1	XP_001642327.1	NP_984583.1	SAKL0F16148g	XP_715779.1;XP_715830.1	XP_659680.1	NP_594750.1	26.8501	24.4928	33.8956	32.413	42.8194	38.0903	0.169209	N	up	No	No	25.3438	26.9924	37.2854	36.6819	45.2182	47.9146	-0.0892332	N	down	26.4702	24.6762	37.1487	36.6819	46.6366	43.9818	0.08769	N	up	27.9701	27.0324	41.7593	36.6819	49.4232	48.0916	0.0439242	N	up	Klla0B	311810
KLLA0B03454g	YPR186C	XP_003955463.1	XP_003674463.1	XP_001647107.1	NP_984582.2	SAKL0F16170g	XP_710284.1	XP_658869.1;XP_660352.1	NP_594670.1	12.3841	26.5373	10.8291	23.4101	13.5212	27.5081	-1.0264	Y	down	No	No	19.9781	19.2886	19.4356	16.9303	23.5397	22.1143	0.113634	N	up	22.5472	17.6332	20.6979	16.9303	25.9878	20.2991	0.360513	N	up	33.6131	19.3164	32.8997	16.9303	38.9469	22.196	0.82009	N	up	Klla0B	314015
KLLA0B03476g	YPR187W	XP_003955462.1	XP_003674464.1	XP_001647108.1	NP_984581.1	SAKL0F16192g	XP_712026.1;XP_712047.1	XP_660351.1	NP_587956.1	124.414	284.628	48.1277	114.319	60.446	134.323	-1.15236	Y	down	No	No	268.539	272.087	100.417	94.3274	121.726	123.126	-0.0195143	N	down	227.414	248.75	81.6147	94.3274	102.346	113.021	-0.143914	N	down	333.247	272.541	129.302	94.3274	153.102	123.581	0.307126	N	up	Klla0B	315833
KLLA0B03498g	YPR188C	XP_003955461.1	XP_003674465.1	XP_001647109.1	NP_984580.1	SAKL0F16214g	XP_712025.1;XP_712046.1	NA	NP_594364.1	79.1708	88.7348	16.4754	19.6882	20.5719	23.1328	-0.170898	N	down	No	No	113.186	83.5557	25.9593	17.9406	31.4682	23.4071	0.409553	N	up	85.7543	76.3908	19.3709	17.9406	24.2668	21.4864	0.170685	N	up	96.2434	83.7029	22.7275	17.9406	26.9035	23.4936	0.177634	N	up	Klla0B	316552
KLLA0B03520g	YPR189W	XP_003955460.1	XP_003674466.1	XP_001647110.1	NP_984579.2	SAKL0F16236g	XP_723344.1;XP_723534.1	XP_660618.1	NP_588487.1	36.698	33.9218	93.0158	89.0489	117.694	104.644	0.169849	N	up	No	No	27.5407	30.7434	86.5633	88.802	104.9	115.93	-0.14372	N	down	30.3523	28.1062	90.8689	88.802	114.015	106.416	0.0985357	N	up	29.5746	30.7931	94.8476	88.802	112.266	116.359	-0.0534633	N	down	Klla0B	317409
KLLA0B03542g	YPR190C	XP_003955459.1	XP_003674467.1	XP_001647112.1	NP_984578.1	SAKL0F16258g	XP_715778.1;XP_715829.1	XP_681541.1	NP_594129.1	16.1406	32.2734	22.8056	46.301	28.6853	54.3972	-0.923377	N	down	No	No	42.3034	31.5208	59.5728	41.1125	72.1557	53.6005	0.423678	N	up	21.2626	28.8194	29.2036	41.1125	36.6075	49.203	-0.433192	N	down	54.2078	31.5833	77.7978	41.1125	92.0961	53.7989	0.762766	N	up	Klla0B	321676
KLLA0B03564g	YPR191W	XP_003955458.1	XP_003674468.1	XP_001647113.1	NP_983205.2	SAKL0F16280g	XP_712027.1;XP_712048.1	XP_681542.1	NP_587698.1	1016.55	571.474	813.568	493.481	1023.76	579.81	0.820207	N	up	No	No	1456.01	983.709	1059.38	662.388	1284.06	864.626	0.57029	N	up	674.238	899.333	471.415	662.388	591.4	793.67	-0.424564	N	down	1383.9	985.337	1030.17	662.388	1219.73	867.823	0.490808	N	up	Klla0B	324536
KLLA0B03586g	YHR205W	XP_003956131.1	XP_003673585.1	XP_001642384.1	NP_983707.1	SAKL0B12364g	XP_720953.1;XP_721075.1	XP_661842.1	NP_593754.1;NP_594840.1	83.7617	103.977	121.091	156.708	152.835	184.144	-0.26879	N	down	No	No	81.4785	91.5131	129.619	133.698	157.097	174.515	-0.152772	N	down	80.205	83.6637	121.245	133.698	152.118	160.193	-0.0757091	N	down	117.306	91.6645	189.191	133.698	224.022	175.16	0.353703	N	up	Klla0B	326871
KLLA0B03608g	YHR204W	XP_003956130.1	XP_003673584.1	XP_001643561.1	NP_983706.2	SAKL0B12342g	XP_720958.1;XP_721080.1	XP_682353.1	NP_594434.1	27.2307	49.0728	39.6904	74.2643	49.9842	87.2468	-0.803571	N	down	No	No	37.3498	51.3853	60.7508	77.0289	73.6138	100.528	-0.449925	N	down	41.9514	46.9784	65.8877	77.0289	82.7197	92.2784	-0.161375	N	down	48.4813	51.4728	80.6335	77.0289	95.4548	100.9	-0.0843469	N	down	Klla0B	329891
KLLA0B03652g	YHR203C;YJR145C	XP_003956128.1;XP_003957732.1	XP_003673582.1;XP_003678541.1	XP_001644658.1	NP_983705.1	SAKL0B12320g	XP_717065.1;XP_717144.1;XP_718177.1;XP_718444.1	XP_662398.1	NP_594174.1;NP_595677.1;NP_596350.1	3105.14	3959.45	2579.56	3501.96	3276.17	4114.73	-0.328776	N	down	No	No	3244.92	4271.41	2799.9	3406.77	3394.03	4448.42	-0.390323	N	down	3773.91	3904.94	3148.41	3406.77	3950.83	4083.32	-0.0475874	N	down	3227.02	4278.06	2847.72	3406.77	3371.66	4464.86	-0.40514	N	down	Klla0B	332993
KLLA0B03674g	YHR202W	XP_003956127.1	XP_003673581.1	XP_001643562.1	NP_983704.1	SAKL0B12298g	XP_717066.1;XP_717145.1	XP_682671.1	NP_594993.1;NP_596852.1	53.7186	24.9645	62.0705	29.9611	78.9663	35.2087	1.16578	Y	up	Yes	No	41.9463	40.1502	56.5939	49.7996	68.6107	65.0885	0.0816712	N	up	39.9707	36.7033	51.6683	49.7996	64.8516	59.7453	0.124981	N	up	30.0129	40.2026	41.7911	49.7996	49.4728	65.3289	-0.391424	N	down	Klla0B	334364
KLLA0B03718g	NA	NA	NA	NA	NP_982860.1	SAKL0B12232g	NA	NA	NA	102.349	64.6715	44.055	28.3713	55.7469	33.3411	0.74196	N	up	No	No	108.199	60.3136	59.145	30.2621	71.6802	39.4947	0.853583	N	up	58.4255	55.1411	31.072	30.2621	39.0162	36.2537	0.0985725	N	up	124.428	60.4172	70.2782	30.2621	83.205	39.6407	1.06124	Y	up	Klla0B	336976
KLLA0B03740g	YJR144W	XP_003956126.1	XP_003673580.1	XP_001643563.1	NP_982861.1	SAKL0B12210g	XP_721183.1;XP_721455.1	XP_663658.1	NP_596277.2	217.906	177.053	87.7335	75.2833	111.047	88.4647	0.328323	N	up	No	No	196.094	184.496	96.2008	82.4734	116.582	107.671	0.115005	N	up	187.961	168.67	87.7968	82.4734	110.253	98.8344	0.156017	N	up	223.984	184.797	112.029	82.4734	132.657	108.069	0.295039	N	up	Klla0B	337996
KLLA0B03762g	YJR143C	XP_003957731.1	XP_003678542.1	XP_001643564.1	NP_982862.2	SAKL0B12188g	XP_714142.1;XP_714280.1	XP_659063.1	NP_596807.1	214.741	240.355	291.169	347.862	368.815	408.772	-0.148307	N	down	No	No	205.727	255.711	342.943	395.263	415.704	516.138	-0.312339	N	down	233.505	233.772	372.6	395.263	467.701	473.776	-0.0186463	N	down	213.643	256.107	364.65	395.263	431.625	518.045	-0.263271	N	down	Klla0B	339424
KLLA0B03784g	YJR142W	XP_003957730.1	XP_003678543.1	XP_001643565.1	NP_982863.2	SAKL0G18766g	XP_440420.1;XP_714282.1	XP_657797.1	NP_593291.1	54.4746	39.143	31.4861	24.4063	39.9822	28.6819	0.48023	N	up	No	No	55.91	53.1222	36.5038	32.4931	44.2464	42.4387	0.063283	N	up	47.4981	48.5642	30.2456	32.4931	37.9422	38.9554	-0.0337224	N	down	48.7146	53.2032	32.7383	32.4931	38.7525	42.5956	-0.131928	N	down	Klla0B	341886
KLLA0B03806g	YHR201C	XP_003956125.1	XP_003673579.1	XP_001643566.1	NP_982864.1	SAKL0G18744g	XP_714140.1;XP_714278.1	XP_661383.1	NP_594390.1	98.2225	97.3204	63.6683	64.9653	80.36	76.3362	0.0742946	N	up	No	No	86.0215	83.8549	66.3765	59.3297	80.4515	77.4864	0.0564978	N	up	81.0879	76.6593	60.4551	59.3297	75.8769	71.1265	0.0947594	N	up	82.7526	83.9799	66.2409	59.3297	78.4236	77.7728	0.0151208	N	up	Klla0B	343108
KLLA0B03828g	YJR141W	XP_003957729.1	XP_003678544.1	XP_001643567.1	NP_982865.1	SAKL0G18722g	XP_714139.1;XP_714277.1	XP_660565.1	NP_595427.1	84.4792	79.1297	49.5182	47.5604	62.1142	55.8837	0.152136	N	up	No	No	77.2378	56.2103	54.2456	36.2709	65.755	47.3632	0.472602	N	up	52.3731	51.3875	35.0598	36.2709	43.9722	43.476	0.0184856	N	up	80.5069	56.2969	57.705	36.2709	68.308	47.5383	0.523842	N	up	Klla0B	344307
KLLA0B03850g	YJR140C	XP_003957728.1	XP_003678545.1	XP_001643569.1	NP_982866.2	SAKL0G18700g	XP_719701.1;XP_719818.1	XP_660727.1	NP_596576.1	10.8125	13.207	33.4712	41.1739	41.8369	48.3901	-0.210684	N	down	No	No	11.635	11.8463	42.807	40.356	51.8836	52.676	-0.0261478	N	down	11.955	10.8303	42.2479	40.356	53.0528	48.3531	0.129049	N	up	10.8756	11.866	40.9342	40.356	48.4537	52.8708	-0.131827	N	down	Klla0B	345635
KLLA0B03872g	YJR139C	XP_003956124.1	XP_003673578.1	XP_001644708.1	NP_982867.1	SAKL0G18678g	XP_721178.1;XP_721450.1	XP_660486.1	NP_596318.1	499.786	567.794	385.185	470.528	488.524	552.922	-0.178569	N	down	No	No	514.963	693.723	417.848	519.586	506.396	678.421	-0.421739	N	down	698.287	634.208	543.711	519.586	682.498	622.742	0.132095	N	up	513.649	694.817	425.294	519.586	503.582	680.929	-0.435201	N	down	Klla0B	350966
KLLA0B03894g	YJR138W	XP_003957727.1	XP_003678546.1	NA	NP_982868.2	SAKL0G18656g	XP_721176.1;XP_721448.1	XP_680775.1;XP_680775.1	NP_596645.1;NP_596645.1;NP_596645.1;NP_596645.1	15.3973	11.9278	48.5292	38.826	60.951	45.6217	0.4175	N	up	No	No	15.3988	12.9739	54.9763	43.6165	66.6379	56.9224	0.220338	N	up	11.8406	11.8613	41.1622	43.6165	51.6727	52.2512	-0.0217746	N	down	13.8288	12.9965	50.532	43.6165	59.8081	57.1329	0.0584254	N	up	Klla0B	352195
KLLA0B03916g	YHR200W	XP_003956123.1	XP_003673577.1	XP_001644709.1	NP_982869.1	SAKL0G18634g	XP_714135.1;XP_714273.1	XP_680848.1	NP_594628.1	263.917	200.229	101.621	79.9768	128.39	93.9749	0.450351	N	up	No	No	246.507	257.322	111.993	107.612	135.743	140.58	-0.0482116	N	down	262.841	235.238	114.86	107.612	144.151	129.041	0.161797	N	up	224.951	257.689	104.283	107.612	123.455	141.099	-0.189642	N	down	Klla0B	357312
KLLA0B03927g	NA	NA	NA	NA	NA	NA	NA	NA	NA	100.064	94.3296	5.69207	5.99712	7.14309	7.04795	0.0183565	N	up	No	No	101.026	117.254	6.0618	6.44702	7.34662	8.41812	-0.193022	N	down	105.193	107.193	6.19921	6.44702	7.7811	7.72722	0.00884691	N	up	73.5727	117.433	4.08255	6.44702	4.83503	8.44923	-0.798103	N	down	Klla0B	358538
KLLA0B03938g	YJR137C	XP_003957724.1;XP_003957726.1	XP_003678547.1	NA	NP_982870.2	SAKL0G18590g	XP_714132.1;XP_714270.1	XP_680869.1	NP_593252.1	72.1811	124.846	180.393	328.533	228.093	386.007	-0.758897	N	down	No	No	38.1644	64.615	104.933	164.625	127.253	215.251	-0.758044	N	down	79.6273	59.066	210.346	164.625	264.016	197.579	0.420505	N	up	28.2247	64.6916	79.5945	164.625	94.2464	216.045	-1.19337	Y	down	Klla0B	359757
KLLA0B03982g	YHR199C;YHR198C	XP_003956122.1	XP_003673576.1	XP_001643570.1	NP_982871.1	SAKL0G18568g	XP_710945.1	XP_661820.1	NP_593665.1	159.916	168.56	91.565	99.6114	115.434	117.063	-0.0201346	N	down	No	No	139.611	182.358	84.7256	101.447	102.674	132.579	-0.363644	N	down	218.185	166.703	126.066	101.447	158.172	121.695	0.38187	N	up	128.403	182.6	79.4754	101.447	94.1011	133.068	-0.494859	N	down	Klla0B	364575
KLLA0B04004g	NA	NA	NA	NA	NA	SAKL0G18546g	XP_710941.1	XP_680740.1	NP_596722.1	13.4432	15.5257	18.2329	21.2896	22.8366	25.0169	-0.13284	N	down	No	No	19.2833	17.8626	31.017	26.3741	37.595	34.4346	0.124629	N	up	16.5277	16.3302	25.2063	26.3741	31.6232	31.6086	4.91e-05	N	up	20.6961	17.8909	33.813	26.3741	40.0306	34.5619	0.210435	N	up	Klla0B	365687
KLLA0B04026g	YJR136C	XP_003957723.1	XP_003678539.1	XP_001643571.1	NP_982872.1	SAKL0G18524g	NA	NA	NA	17.7845	19.8847	13.8204	15.2804	17.336	17.9518	-0.0517242	N	down	No	No	23.8041	20.4145	23.3738	18.4701	28.3386	24.1169	0.224919	N	up	15.9632	18.6626	14.7742	18.4701	18.5263	22.1376	-0.254263	N	down	23.5371	20.4444	23.5733	18.4701	27.913	24.206	0.20752	N	up	Klla0B	368180
KLLA0B04048g	YJR135W-A	XP_003957722.1	XP_003678538.1	XP_001644710.1	NP_982873.1	SAKL0G18502g	XP_710939.1	NA	NP_592830.2	685.119	630.4	46.6992	43.7718	58.7559	51.4367	0.191844	N	up	No	No	1434.85	1319.57	110.544	92.5625	133.981	120.833	0.147737	N	up	853.878	1206.39	64.8305	92.5625	81.3091	110.916	-0.448399	N	down	1819.49	1321.76	142.996	92.5625	169.288	121.279	0.479427	N	up	Klla0B	369643
KLLA0B04070g	YJR135C	XP_003957721.1	XP_003678537.1	XP_001644711.1	NP_982874.2	SAKL0G18480g	NA	NA	NA	15.9927	20.9698	6.13361	8.30113	7.71116	9.75385	-0.340283	N	down	No	No	25.719	25.8335	10.4239	9.90863	12.6425	12.926	-0.0720085	N	down	24.0897	23.6182	10.0046	9.90863	12.556	11.8654	0.0620205	N	up	29.4018	25.8784	12.7847	9.90863	15.1384	12.9738	0.200369	N	up	Klla0B	370262
KLLA0B04092g	YHR197W	XP_003956121.1	XP_003673575.1	XP_001644712.1	NP_982875.2	SAKL0G18458g	XP_712220.1;XP_712250.1	XP_659862.1	NP_587820.1	41.2213	68.8916	57.0977	98.5953	72.1585	115.845	-0.682614	N	down	No	No	67.7387	69.3605	112.606	107.167	136.477	139.81	-0.038203	N	down	44.093	63.4138	70.1985	107.167	87.9829	128.338	-0.546011	N	down	85.3607	69.4872	146.034	107.167	172.879	140.327	0.296675	N	up	Klla0B	370977
KLLA0B04136g	YJR134C	XP_003957720.1	XP_003678536.1	XP_001643908.1	NP_982876.1	SAKL0G18414g	XP_719695.1;XP_719812.1	XP_658814.1	NP_596036.1	27.8775	38.5848	38.8615	53.7299	48.809	63.1345	-0.371772	N	down	No	No	32.7392	38.9862	47.3812	51.2807	57.4374	66.9541	-0.224855	N	down	40.1603	35.6416	54.425	51.2807	68.3066	61.4591	0.151374	N	up	34.5682	39.0481	50.9035	51.2807	60.2678	67.2016	-0.157463	N	down	Klla0B	373969
KLLA0B04158g	YJR133W	XP_003957719.1	XP_003678535.1	NA	NP_982877.2	SAKL0G18392g	XP_715307.1;XP_715372.1	XP_664597.1	NP_593644.1	182.67	321.451	62.0393	115	78.0825	135.121	-0.791196	N	down	No	No	288.33	288.195	111.331	103.948	134.934	135.644	-0.0104086	N	down	181.878	263.483	67.5065	103.948	84.6201	124.513	-0.558141	N	down	360.135	288.705	142.772	103.948	169.015	136.146	0.308316	N	up	Klla0B	376098
KLLA0B04180g	YHR196W	XP_003957718.1	XP_003678534.1	XP_001643907.1	NP_982878.2	SAKL0G18370g	XP_719693.1;XP_719810.1	NA	NA	45.4744	104.728	47.201	111.24	59.2153	130.716	-1.14287	Y	down	No	No	90.849	97.4129	103.33	101.874	125.222	133.044	-0.0851371	N	down	77.4495	89.0546	84.227	101.874	105.618	122.124	-0.207825	N	down	119.714	97.5612	138.308	101.874	163.732	133.536	0.295363	N	up	Klla0B	377179
KLLA0B04202g	YJR132W	XP_003957717.1	XP_003678533.1	XP_001643906.1	NP_982879.2	SAKL0G18348g	XP_712642.1;XP_712793.1	XP_663610.1	NP_588103.1	50.7085	59.914	89.9543	109.948	113.746	129.186	-0.183376	N	down	No	No	46.2227	50.5842	107.459	108.046	130.241	141.063	-0.115538	N	down	43.2159	46.2447	95.5653	108.046	119.88	129.486	-0.111379	N	down	51.0906	50.6646	120.791	108.046	143.003	141.584	0.013707	N	up	Klla0B	379105
KLLA0B04224g	YHR195W	NA	XP_003673574.1	NA	NA	SAKL0G18326g	NA	NA	NA	31.995	30.9309	14.4477	14.2339	18.1592	16.7296	0.117843	N	up	No	No	50.2967	52.909	26.5303	25.5311	32.1658	33.3351	-0.0596372	N	down	41.1374	48.3698	20.3977	25.5311	25.6025	30.5992	-0.258814	N	down	40.8445	52.9919	21.9587	25.5311	25.9971	33.4583	-0.364353	N	down	Klla0B	382676
KLLA0B04246g	YHR194W	XP_003956119.1	XP_003673573.1	XP_001643904.1	NP_982881.1	SAKL0G18304g	XP_721213.1;XP_721485.1	XP_663390.1	NP_593546.1	73.8244	66.3829	73.8372	69.1142	93.8383	81.2146	0.208897	N	up	No	No	41.024	56.4854	51.5968	65.2936	62.5899	85.2657	-0.455724	N	down	55.113	51.6388	66.2877	65.2936	83.1519	78.2676	0.0887858	N	up	50.5821	56.5716	64.8617	65.2936	76.7994	85.5809	-0.154151	N	down	Klla0B	383847
KLLA0B04290g	YHR193C	XP_003956118.1;XP_003957716.1	XP_003673571.1	XP_001646658.1	NP_985026.1	SAKL0G18260g	XP_722928.1;XP_723074.1	XP_664234.1	NP_596361.1	835.439	1221.37	290.171	458.853	366.435	539.164	-0.557109	N	down	No	No	1221.06	1565.1	353.313	420.513	428.13	548.974	-0.358407	N	down	1431.59	1430.84	399.384	420.513	501.016	503.921	-0.00846741	N	down	1283.44	1567.61	380.793	420.513	450.824	551.004	-0.289756	N	down	Klla0B	386351
KLLA0B04312g	YHR192W	XP_003956117.1	XP_003673570.1	XP_001646659.1	NP_985025.1	SAKL0G18238g	XP_722927.1;XP_723073.1	XP_660794.1	NA	93.9473	82.343	40.7332	36.8357	51.4143	43.2887	0.248383	N	up	No	No	79.1371	70.7946	41.2436	34.5657	50.0053	45.1546	0.147902	N	up	70.8495	64.7197	35.625	34.5657	44.7113	41.4482	0.114586	N	up	73.0721	70.9001	38.8708	34.5657	46.0172	45.3214	0.0303966	N	up	Klla0B	386963
KLLA0B04334g	YHR191C	XP_003956116.1	XP_003673569.1	XP_001646660.1	NP_985024.1	SAKL0G18216g	XP_714161.1;XP_714204.1	XP_659581.1	NA	62.089	84.0037	8.93928	12.1344	11.2336	14.2567	-0.344585	N	down	No	No	76.393	94.3304	14.0428	15.7342	17.0244	20.5608	-0.263289	N	down	81.9561	86.2332	13.8414	15.7342	17.3818	18.873	-0.108973	N	down	64.3238	94.4586	12.2702	15.7342	14.5312	20.6367	-0.485112	N	down	Klla0B	388079
KLLA0B04356g	YJR131W	XP_003957715.1	XP_003678532.1	XP_001646661.1	NP_985023.1	SAKL0G18194g	XP_713641.1;XP_713686.1	XP_658155.1;XP_663352.1	NP_594139.2	53.7647	44.2797	51.6006	43.8269	65.3808	51.4919	0.344968	N	up	No	No	52.8209	59.517	61.1214	63.3136	74.0925	82.692	-0.157946	N	down	57.1195	54.4101	63.3002	63.3136	79.437	75.9048	0.0675173	N	up	51.4514	59.6067	60.9421	63.3136	72.1392	82.9976	-0.199644	N	down	Klla0B	388545
KLLA0B04378g	YML082W;YJR130C	XP_003956115.1	XP_003673568.1	XP_001646662.1	NP_985022.2	SAKL0G18172g	XP_713638.1;XP_713683.1	XP_661060.1	NP_596249.1	73.4933	58.714	91.9151	76.495	116.211	89.8833	0.370809	N	up	No	No	64.1056	61.6317	93.9615	83.6476	113.907	109.28	0.0616262	N	up	67.4408	56.3422	94.7911	83.6476	118.903	100.31	0.248699	N	up	58.7613	61.7192	87.9505	83.6476	104.121	109.684	-0.0708375	N	down	Klla0B	390701
KLLA0B04400g	YML081C-A	XP_003956114.1	XP_003673567.1	XP_001643572.1	NP_985021.2	SAKL0G18150g	NA	NA	NP_593183.1	15470.3	11918.4	318.745	267.994	401.39	314.906	0.350077	N	up	No	No	15835.1	14998.3	351.221	311.909	425.647	407.135	0.0638656	N	up	12653.8	13711.9	276.092	311.909	346.48	373.723	-0.109718	N	down	12120.3	15023.2	282.109	311.909	333.978	408.64	-0.291759	N	down	Klla0B	393246
KLLA0B04422g	YIR029W	NA	XP_003676435.1	NA	NP_985020.1	SAKL0G18128g	XP_719512.1;XP_719636.1	XP_660708.1	NP_594495.1	23.1336	20.0884	14.3508	13.4817	18.1533	15.8411	0.197435	N	up	No	No	23.0692	19.7709	16.2851	13.0543	19.7512	17.0516	0.201726	N	up	16.6276	18.0744	11.0533	13.0543	13.8759	15.652	-0.1682	N	down	22.4561	19.8007	15.9736	13.0543	18.9114	17.1146	0.15496	N	up	Klla0B	394524
KLLA0B04444g	YJR129C	XP_003957714.1	XP_003678531.1	XP_001646663.1	NP_985019.1	SAKL0G18106g	XP_719513.1;XP_719637.1	XP_682367.1	NP_594200.2	40.452	94.4335	18.9729	46.8155	23.9744	55.0133	-1.19762	Y	down	No	No	53.4917	51.0943	30.5852	27.3009	37.0375	35.6479	0.0704887	N	up	60.8504	46.7104	34.5231	27.3009	43.3178	32.7222	0.404912	N	up	60.9844	51.1726	35.5631	27.3009	42.1032	35.7797	0.235437	N	up	Klla0B	395811
KLLA0B04455g	NA	NA	NA	NA	XP_002999484.1	NA	NA	NA	NA	24.5316	57.045	13.5829	31.5225	17.0534	37.0438	-1.12013	Y	down	No	No	34.3665	47.5828	19.4065	24.4445	23.5263	31.9118	-0.448787	N	down	50.4078	43.501	27.0178	24.4445	33.9393	29.2928	0.20736	N	up	40.2632	47.6598	22.9313	24.4445	27.1498	32.0298	-0.241679	N	down	Klla0B	396805
KLLA0B04466g	NA	NA	NA	NA	NP_985018.1	Sklu_YGOB_AER160C	NA	NA	NA	1991.5	3619.92	84.4193	166.56	107.168	195.725	-0.868694	N	down	No	No	1367.1	2117.13	66.6811	93.0627	80.8619	121.712	-0.588186	N	down	3170.08	1935.26	145.122	93.0627	182.107	111.719	0.709535	N	up	452.436	2119.39	23.0227	93.0627	27.2727	122.162	-2.15648	Y	down	Klla0B	398179
KLLA0B04477g	YML081W;YJR127C	XP_003956113.1	XP_003673566.1	XP_001643947.1	NP_985017.2	SAKL0G18062g	XP_722229.1;XP_722343.1	XP_868874.1;XP_868874.1;XP_868874.1;XP_868874.1	NP_593288.1;NP_593553.1;NP_595073.1;NP_596183.1	18.1824	15.3228	48.6085	42.474	61.2565	49.9072	0.29566	N	up	No	No	16.5454	19.3082	49.1804	53.0986	59.6057	69.3252	-0.218187	N	down	14.226	17.6518	40.4573	53.0986	50.7835	63.6357	-0.327144	N	down	19.7537	19.339	59.9807	53.0986	70.9988	69.5815	0.027263	N	up	Klla0B	400019
KLLA0B04499g	YML080W	XP_003956112.1	XP_003673565.1	NA	NP_985016.2	SAKL0G18040g	XP_714575.1;XP_714669.1	XP_658560.1	NP_595986.1	26.8453	43.3337	20.6533	33.5095	25.7257	39.372	-0.615446	N	down	No	No	58.8871	40.85	50.6286	32.1371	61.3297	41.9235	0.545036	N	up	24.3919	37.3477	19.9142	32.1371	24.9833	38.4835	-0.631928	N	down	75.0866	40.9249	65.027	32.1371	76.9702	42.0786	0.85755	N	up	Klla0B	404546
KLLA0B04521g	YML079W	XP_003956104.1	XP_003673564.1	NA	NA	SAKL0G18018g	NA	XP_681414.1	NA	118.035	123.391	37.4423	41.5263	47.4209	48.7908	-0.0404239	N	down	No	No	134.387	164.444	49.8162	55.789	60.3416	72.8499	-0.26199	N	down	136.593	150.335	48.1042	55.789	60.3407	66.8709	-0.146919	N	down	133.477	164.697	50.6549	55.789	59.9762	73.1192	-0.284197	N	down	Klla0B	406174
KLLA0B04543g	YJR126C	XP_003957712.1	XP_003678529.1	XP_001646786.1	NP_985015.1	SAKL0G17996g	NA	XP_661622.1	NP_595233.1	21.6487	19.8377	30.9188	29.0148	38.9975	34.0944	0.193926	N	up	No	No	18.1109	24.1549	29.8852	36.9118	36.2552	48.1905	-0.427884	N	down	23.6171	22.0829	37.6218	36.9118	47.1748	44.2355	0.0930544	N	up	16.1656	24.194	27.2369	36.9118	32.2429	48.3686	-0.587672	N	down	Klla0B	407088
KLLA0B04565g	YML078W;YDR155C	XP_003956012.1;XP_003956105.1	XP_003673563.1;XP_003674800.1	XP_001642547.1;XP_001644458.1	NP_985014.1;NP_986490.1	SAKL0G17974g;SAKL0H15268g	XP_720801.1;XP_721313.1;XP_722455.1;XP_722595.1	XP_661418.1;XP_662071.1;XP_681874.1	NP_595437.1;NP_595664.1;NP_596532.1	1221.44	1074.93	402.145	383.897	510.108	451.084	0.177472	N	up	No	No	1332	1690.24	423.677	499.321	513.297	651.975	-0.344304	N	down	1365.69	1545.24	418.285	499.321	524.917	598.466	-0.189205	N	down	1400.74	1692.92	456.034	499.321	539.964	654.385	-0.277188	N	down	Klla0B	409720
KLLA0B04587g	YJR125C	XP_003956106.1	XP_003673562.1	XP_001643948.1	NP_985013.1	SAKL0G17952g	XP_722456.1;XP_722596.1	XP_661425.1	NP_587759.1	66.5441	66.0465	58.8095	60.0657	74.2216	70.5791	0.0726499	N	up	No	No	87.9444	96.3895	70.6188	72.4001	85.6227	94.5785	-0.14389	N	down	106.083	88.1179	82.0393	72.4001	102.997	86.8154	0.248713	N	up	81.2095	96.5314	67.0211	72.4001	79.3466	94.928	-0.254131	N	down	Klla0B	411097
KLLA0B04609g	YML077W	XP_003958943.1	XP_003673561.1	XP_001644459.1	NP_985012.1	SAKL0G17930g	XP_719998.1;XP_720130.1	XP_682097.1	NP_594073.1	39.5879	43.0896	10.3662	11.6412	13.0263	13.6786	-0.0714095	N	down	No	No	58.9421	51.7732	17.2442	14.1432	20.9017	18.4676	0.17756	N	up	44.6966	47.3312	12.5419	14.1432	15.7312	16.9519	-0.105655	N	down	57.1423	51.853	17.2935	14.1432	20.468	18.5358	0.141265	N	up	Klla0B	412600
KLLA0B04620g	YML076C	XP_003958944.1	XP_003673560.1	XP_001643949.1	NP_985011.1	SAKL0G17908g	XP_713640.1;XP_713685.1	XP_658284.1;XP_659203.1;XP_659203.1;XP_660245.1;XP_660256.1;XP_664363.1;XP_664366.1;XP_664394.1;XP_682416.1;XP_682416.1;XP_682416.1;XP_682416.1;XP_682451.1	NP_594923.1	13.9662	10.8524	22.4321	18.1272	28.2375	21.2985	0.406645	N	up	No	No	14.8682	17.517	29.3548	31.6048	35.5911	41.2789	-0.216945	N	down	16.9144	16.0138	31.5185	31.6048	39.5752	37.8908	0.0644919	N	up	13.5453	17.5429	27.155	31.6048	32.1477	41.4315	-0.360106	N	down	Klla0B	413129
KLLA0B04642g	YLR450W;YML075C	XP_003957711.1;XP_003958945.1	XP_003673559.1	XP_001643950.1;XP_001644460.1	NP_985010.2	SAKL0G17886g	XP_713636.1;XP_713681.1	XP_661421.1	NP_588235.1	155.098	341.195	317.136	735.873	400.176	864.727	-1.11158	Y	down	No	No	121.469	195.55	286.914	424.944	347.742	555.177	-0.674222	N	down	258.124	178.767	584.905	424.944	734.528	509.606	0.527796	N	up	167.296	195.826	403.398	424.944	477.616	557.228	-0.221547	N	down	Klla0B	417088
KLLA0B04664g	YLR449W;YML074C	XP_003957710.1	XP_003673558.1	NA	NP_985009.2	SAKL0G17864g	XP_713635.1;XP_713680.1	NA	NP_594535.1;NP_596694.1	96.5493	220.959	110.9	260.66	138.921	306.285	-1.14083	Y	down	No	No	194.711	210.587	165.206	164.898	200.229	215.186	-0.105438	N	down	162.955	192.529	133.405	164.898	167.306	197.528	-0.240599	N	down	300.028	210.955	260.737	164.898	308.688	215.982	0.513194	N	up	Klla0B	421574
KLLA0B04686g	YML073C;YLR448W	XP_003958946.1	XP_003673557.1;XP_003678526.1	XP_001643951.1;XP_001644462.1	NP_985008.1	SAKL0G17842g	XP_710523.1	XP_658770.1	NP_588190.1	2641.15	3607.15	2011.62	2900.22	2535.72	3407.64	-0.426375	N	down	No	No	2198.55	2720.16	1966.07	2256.49	2382.79	2945.91	-0.306069	N	down	2412.25	2486.81	2086.12	2256.49	2617.06	2704.14	-0.0472438	N	down	2189.36	2724.52	2016.44	2256.49	2387.16	2956.8	-0.308788	N	down	Klla0B	423406
KLLA0B04708g	YML072C	XP_003958947.1	XP_003673556.1	XP_001643952.1	NP_985007.1	SAKL0G17820g	XP_721230.1;XP_721501.1	XP_682418.1	NP_593974.1	57.7805	60.7685	190.153	210.538	240.174	247.405	-0.042708	N	down	No	No	44.1498	53.5131	147.664	165.146	178.994	215.674	-0.268914	N	down	63.1584	48.9215	201.683	165.146	253.257	197.972	0.35539	N	up	33.8996	53.5944	115.628	165.146	136.879	216.471	-0.660544	N	down	Klla0B	425404
KLLA0B04730g	YML071C	XP_003958948.1	XP_003673555.1	XP_001643953.1	NP_985006.2	SAKL0G17798g	XP_711823.1;XP_711843.1	NA	NP_595623.2	36.1095	45.9189	29.2365	37.9384	36.9089	44.5753	-0.271983	N	down	No	No	47.7556	51.5541	40.8985	40.438	49.5805	52.8026	-0.0941979	N	down	49.7329	47.1308	40.5514	40.438	50.8594	48.4689	0.070922	N	up	48.5619	51.6336	42.3085	40.438	50.0845	52.9977	-0.0812293	N	down	Klla0B	430341
KLLA0B04752g	YLR447C	XP_003957708.1	XP_003678525.1	XP_001644463.1	NP_985005.2	SAKL0G17776g	XP_710332.1;XP_710349.1	XP_660772.1	NP_594237.1	345.161	328.626	192.121	190.682	242.122	224.05	0.111918	N	up	No	No	283.51	339.141	195.544	214.904	236.984	280.745	-0.243001	N	down	336.789	310.036	221.566	214.904	278.19	257.701	0.111036	N	up	270.707	339.631	190.497	214.904	225.556	281.782	-0.319515	N	down	Klla0B	432210
KLLA0B04774g	NA	NA	NA	NA	NP_985004.1	SAKL0G17754g	XP_713409.1;XP_713445.1	XP_662114.1;XP_662114.1;XP_662114.1;XP_662114.1	NA	36.4353	62.9193	75.8603	137.803	95.8614	161.925	-0.756135	N	down	No	No	36.605	66.0383	89.5503	147.47	108.544	192.656	-0.826221	N	down	68.7664	60.3706	159.956	147.47	200.692	176.842	0.184103	N	up	38.081	66.1324	95.0047	147.47	112.48	193.368	-0.779087	N	down	Klla0B	433472
KLLA0B04796g	NA	NA	NA	XP_001644464.1	NP_985003.1	SAKL0G17732g	XP_712798.1;XP_713639.1;XP_713684.1	XP_658558.1	NA	110.514	144.809	28.114	40.9567	35.574	48.1314	-0.435304	N	down	No	No	121.373	123.725	37.1644	35.3852	45.0444	46.2303	-0.0294573	N	down	144.518	113.106	43.2007	35.3852	54.1912	42.4356	0.360071	N	up	115.727	123.899	36.2551	35.3852	42.912	46.4012	-0.104653	N	down	Klla0B	438316
KLLA0B04818g	NA	NA	NA	NA	NP_985001.1	SAKL0G17666g	XP_716319.1;XP_716381.1	XP_663789.1	NA	95.6317	142.259	23.6708	36.8155	29.8589	43.2599	-0.534639	N	down	No	No	116.592	154.502	29.003	35.5724	35.1358	46.4729	-0.387649	N	down	165.208	141.241	39.0638	35.5724	49.0185	42.6583	0.206834	N	up	121.222	154.719	30.5304	35.5724	36.1401	46.6446	-0.359501	N	down	Klla0B	438908
KLLA0B04840g	NA	NA	NA	NA	NP_985000.2	SAKL0G17622g	XP_716320.1;XP_716382.1	XP_660367.1	NP_595543.1	20.7799	27.0193	28.2763	37.9898	35.8417	44.6408	-0.315771	N	down	No	No	18.4468	29.3375	30.4023	44.5599	36.8773	58.1816	-0.672884	N	down	30.2989	26.8206	47.8905	44.5599	60.1086	53.4066	0.169748	N	up	16.6149	29.3835	27.975	44.5599	33.121	58.3967	-0.817626	N	down	Klla0B	439864
KLLA0B04862g	NA	NA	XP_003678524.1	XP_001644465.1	NP_984999.1	SAKL0G17600g	NA	NA	NP_596001.1	12.3562	4.08815	8.59846	2.91642	10.8289	3.42643	1.65786	Y	up	No	No	13.5947	2.45972	10.8612	1.96089	13.1814	2.56416	2.37178	Y	up	3.19368	2.24851	2.56005	1.96089	3.21229	2.35364	0.494785	N	up	21.7499	2.46275	17.7998	1.96089	21.0716	2.57363	3.08346	Y	up	Klla0B	442398
KLLA0B04884g	YML070W	XP_003958949.1	XP_003673554.1	XP_001644466.1	NP_984998.2	SAKL0G17578g	XP_723274.1;XP_723463.1	XP_657638.1	NP_592787.1;NP_593241.1	108.147	83.3035	112.999	91.9537	143.243	108.05	0.40704	N	up	No	No	46.9175	71.8598	58.2433	81.9731	70.6298	107.234	-0.600014	N	down	119.357	65.6865	142.058	81.9731	178.435	98.4288	0.862415	N	up	38.9408	71.9351	48.8199	81.9731	57.8011	107.629	-0.890517	N	down	Klla0B	443932
KLLA0B04906g	YML069W	XP_003958950.1	XP_003673553.1	XP_001644467.1	NP_984997.1	SAKL0G17556g	XP_722461.1;XP_722602.1	XP_664291.1	NP_596315.1	67.1841	83.7217	77.0169	98.5133	97.122	115.759	-0.253232	N	down	No	No	89.7716	92.4971	103.896	98.3391	125.976	128.433	-0.0296551	N	down	95.7931	84.5603	105.967	98.3391	132.978	117.891	0.174829	N	up	84.5234	92.6363	99.701	98.3391	118.046	128.907	-0.125023	N	down	Klla0B	446132
KLLA0B04928g	YLR445W	XP_003957706.1	XP_003678523.1	XP_001643954.1	NP_984996.1	SAKL0G17534g	NA	NA	NA	13.3269	10.8982	4.20967	3.50959	5.30366	4.12347	0.362595	N	up	No	No	9.12512	11.5289	3.6459	4.13971	4.41963	5.4068	-0.28836	N	down	7.94187	10.5396	3.14805	4.13971	3.95006	4.96302	-0.320841	N	down	8.74426	11.546	3.54537	4.13971	4.19884	5.42678	-0.354488	N	down	Klla0B	449470
KLLA0B04950g	YML067C	XP_003958952.1	XP_003673551.1;XP_003678522.1	XP_001643955.1	NP_984995.1	SAKL0G17512g	XP_723006.1;XP_723153.1	XP_680948.1	NP_596065.1	97.4942	96.0369	65.3208	66.6901	82.3355	78.3649	0.0713704	N	up	No	No	100.871	113.673	79.8124	81.9414	96.7344	106.997	-0.144985	N	down	98.1438	103.92	74.2594	81.9414	93.1986	98.2157	-0.0756643	N	down	98.3586	113.849	79.537	81.9414	94.1634	107.393	-0.189108	N	down	Klla0B	450251
KLLA0B04972g	YML066C	XP_003958953.1	XP_003673550.1	XP_001644469.1	NP_984994.1	SAKL0G17490g	XP_713325.1;XP_713372.1	NA	NA	47.7888	51.5659	26.6808	29.4269	33.7623	34.5763	-0.0339339	N	down	No	No	21.9989	33.7171	16.6194	23.4751	20.1478	30.6651	-0.60462	N	down	34.0237	30.8235	24.3513	23.4751	30.5413	28.1481	0.125547	N	up	34.2587	33.7657	26.3862	23.4751	31.2414	30.7784	0.0320318	N	up	Klla0B	451695
KLLA0B04994g	YLR443W	XP_003957705.1	XP_003678519.1	XP_001643956.1	NP_984993.2	SAKL0G17468g	XP_713324.1;XP_713371.1	NA	NA	39.7353	50.6535	23.5876	30.8875	29.5586	36.291	-0.296959	N	down	No	No	25.6165	37.5067	20.829	28.2081	25.2616	36.8463	-0.554175	N	down	30.3623	34.2878	23.4641	28.2081	29.4326	33.8219	-0.194092	N	down	34.5999	37.5605	28.5092	28.2081	33.7513	36.9824	-0.123589	N	down	Klla0B	453048
KLLA0B05016g	YML065W	XP_003958954.1	XP_003673549.1	XP_001643957.1	NP_984992.2	SAKL0G17446g	XP_721227.1;XP_721498.1	XP_658811.1	NP_596060.1	20.8129	27.8495	36.7555	49.9802	46.0859	58.7312	-0.350457	N	down	No	No	23.3305	23.4047	45.0199	41.4054	54.5778	54.0277	0.00380996	N	up	22.3835	21.3977	41.4205	41.4054	51.9261	49.5942	0.0625024	N	up	28.6082	23.4458	56.3762	41.4054	66.7351	54.2275	0.289957	N	up	Klla0B	454717
KLLA0B05038g	YML064C	XP_003958955.1	XP_003673548.1;XP_003678517.1	XP_001644471.1	NP_984991.1	SAKL0G17424g	XP_721228.1;XP_721499.1	XP_664810.1	NP_593285.1	28.0837	32.4271	10.7719	12.8803	13.5399	15.1324	-0.16082	N	down	No	No	40.1065	41.3387	16.497	15.5421	19.9901	20.2987	-0.00912291	N	down	31.3149	37.7919	12.0033	15.5421	15.0481	18.6326	-0.30026	N	down	31.8243	41.4024	13.0365	15.5421	15.4401	20.3737	-0.389385	N	down	Klla0B	457608
KLLA0B05060g	YLR441C;YML063W	XP_003957703.1;XP_003958956.1	XP_003673547.1;XP_003678516.1	XP_001643958.1	NP_984990.1	SAKL0G17402g	XP_721229.1;XP_721500.1	XP_682139.1	NP_592828.1;NP_593116.1	4794.52	6166.8	2729.13	3767.65	3448.84	4427.16	-0.360263	N	down	No	No	6593.21	8164.6	3086.15	3520.53	3740.37	4596.33	-0.297304	N	down	7132.6	7464.21	3197.71	3520.53	4012.08	4219.11	-0.072597	N	down	6597.66	8177.7	3156.77	3520.53	3737.32	4613.32	-0.303819	N	down	Klla0B	459171
KLLA0B05082g	YML062C	XP_003958957.1	XP_003673546.1	XP_001644472.1	NP_984989.1	SAKL0G17380g	NA	NA	NA	23.0538	37.1283	13.8865	22.695	17.4314	26.6685	-0.614448	N	down	No	No	35.5932	34.6301	25.6419	22.3844	31.0731	29.1987	0.0791375	N	up	33.9826	31.6613	22.7023	22.3844	28.4508	26.8029	0.0787324	N	up	41.5397	34.6943	29.813	22.3844	35.3021	29.3068	0.252467	N	up	Klla0B	460262
KLLA0B05115g	YLR440C	XP_003957702.1	XP_003678515.1	XP_001644473.1	NP_984988.1	SAKL0G17358g	XP_712341.1;XP_712377.1	XP_661792.1	NA	39.5623	36.4198	44.7796	42.1277	56.5688	49.5074	0.19279	N	up	No	No	30.7171	40.6737	44.2345	54.47	53.6275	71.1238	-0.411766	N	down	34.3101	37.1838	48.1451	54.47	60.4199	65.2865	-0.111888	N	down	27.8442	40.7358	40.9567	54.47	48.4784	71.3867	-0.55903	N	down	Klla0B	461624
KLLA0B05137g	YML061C	XP_003958958.1	XP_003673236.1	XP_001643959.1;XP_001644474.1	NP_984987.1	SAKL0G17336g	XP_712340.1;XP_712376.1;XP_718694.1	XP_664499.1	NP_596488.1	15.432	19.0227	26.9949	33.6488	33.6585	39.5393	-0.233521	N	down	No	No	19.0466	16.3886	36.2402	28.706	43.9077	37.4805	0.23489	N	up	17.2493	14.9827	31.2164	28.706	39.1996	34.4044	0.18577	N	up	21.7035	16.4149	41.8505	28.706	49.5433	37.619	0.396141	N	up	Klla0B	463716
KLLA0B05159g	YML060W	XP_003958959.1	XP_003673235.1	XP_001643960.1	NP_984986.1	SAKL0G17314g	XP_715239.1	XP_664286.1	NA	15.1351	24.1545	11.7471	19.1844	14.6509	22.5396	-0.623441	N	down	No	No	27.62	20.1361	22.5701	14.94	27.3377	19.496	0.490761	N	up	18.7727	18.4095	14.3876	14.94	18.0645	17.8962	0.00115038	N	up	24.1267	20.1717	20.1098	14.94	23.8094	19.5681	0.269131	N	up	Klla0B	466882
KLLA0B05181g	YLR439W	XP_003957701.1	XP_003678514.1	XP_001643961.1	NP_984985.2	SAKL0G17292g	XP_712343.1;XP_712379.1	XP_663501.1	NP_587832.1	159.219	205.002	91.4231	121.535	115.043	142.807	-0.312009	N	down	No	No	411.854	252.262	267.926	151.116	324.704	197.19	0.717904	N	up	183.659	230.63	114.68	151.116	143.845	181.009	-0.332984	N	down	548.449	252.706	364.101	151.116	431.059	197.919	1.12058	Y	up	Klla0B	468267
KLLA0B05203g	YLR438C-A	XP_003957700.1	XP_003678512.1	XP_001643962.1	NP_984984.1	SAKL0G17270g	NA	XP_657651.1	NP_595747.1	658.804	665.471	35.2389	39.2723	44.3091	46.1484	-0.0588915	N	down	No	No	641.739	704.255	44.9177	46.3507	54.4274	60.4913	-0.153387	N	down	658.859	643.873	44.6769	46.3507	56.0521	55.5272	0.00921794	N	up	614.87	705.53	43.6121	46.3507	51.6325	60.715	-0.24024	N	down	Klla0B	469929
KLLA0B05225g	YML059C	XP_003958960.1	XP_003673234.1	XP_001643963.1	NP_984983.1	SAKL0G17248g	XP_716153.1;XP_716236.1	XP_660085.1	NP_588086.1	11.592	14.7348	33.0924	42.73	41.3559	50.2096	-0.280736	N	down	No	No	12.0209	13.8089	38.931	40.9419	47.1744	53.4671	-0.173844	N	down	13.963	12.624	43.0896	40.9419	54.049	49.0788	0.141687	N	up	11.281	13.8299	37.0723	40.9419	43.8822	53.6647	-0.288498	N	down	Klla0B	470465
KLLA0B05247g	YLR438W	XP_003957699.1	XP_003678511.1	XP_001644475.1	NP_984982.1	SAKL0G17182g	XP_713322.1;XP_713369.1	XP_659414.1	NP_596588.1	2007.22	895.102	1647.87	796.726	2075.19	936.101	1.1485	Y	up	Yes	No	1537.37	1173.85	1369.23	965.116	1659.53	1259.64	0.397554	N	up	883.696	1073.17	754.355	965.116	946.511	1156.27	-0.28897	N	down	1599.1	1175.84	1453.23	965.116	1720.53	1264.3	0.444238	N	up	Klla0B	475265
KLLA0B05269g	NA	NA	NA	NA	NA	NA	NA	NA	NA	220.25	152.46	39.2464	28.5336	49.3243	33.5295	0.556534	N	up	No	No	163.428	166.923	34.3645	32.1687	41.662	41.9992	-0.018447	N	down	142.981	152.603	29.2111	32.1687	36.6838	38.5523	-0.0748879	N	down	154.481	167.187	33.493	32.1687	39.6434	42.1544	-0.0917942	N	down	Klla0B	477175
KLLA0B05379g	NA	NA	NA	NA	NA	NA	NA	NA	NA	27.1772	8.1818	2.97161	0.93419	3.7547	1.09717	1.77	Y	up	No	No	19.6108	11.6705	2.68427	1.32906	3.25523	1.73632	0.898216	N	up	10.2811	10.6684	1.28145	1.32906	1.60846	1.5938	0.0293994	N	up	14.4601	11.6852	2.03557	1.32906	2.40992	1.74274	0.48649	N	up	Klla0B	482011
KLLA0B05423g	YLR437C;YML058W	XP_003955126.1;XP_003958963.1	XP_003673232.1;XP_003678509.1;XP_003678521.1	XP_001644476.1	NP_984981.1	SAKL0G17160g	XP_713323.1;XP_713370.1	NA	NA	1357.28	997.842	295.844	231.278	374.077	271.752	0.461101	N	up	No	No	1413.48	1219.86	340.057	271.166	412.17	354.063	0.219165	N	up	1137.64	1115.21	260.506	271.166	326.98	325.004	0.00859431	N	up	1198.9	1221.77	294.832	271.166	349.092	355.372	-0.0256269	N	down	Klla0B	483167
KLLA0B05445g	YLR436C	XP_003955127.1	XP_003678508.1;XP_003678508.1	XP_001643965.1	NP_984980.2	SAKL0G17138g;SAKL0G17138g	XP_721222.1;XP_721494.1	XP_682078.1	NP_593417.1;NP_593484.1	28.676	38.8781	47.138	67.3351	59.4487	79.1163	-0.412305	N	down	No	No	29.1327	35.4614	65.9253	73.0107	79.8978	95.312	-0.255162	N	down	30.7026	32.4195	65.1867	73.0107	81.7727	87.4899	-0.0984326	N	down	31.8514	35.5192	73.1465	73.0107	86.5795	95.6644	-0.146493	N	down	Klla0B	484297
KLLA0B05467g	YLR435W	XP_003955128.1	XP_003678507.1	XP_001643966.1	NP_984979.1	SAKL0G17116g	XP_721224.1;XP_721496.1	XP_659683.1	NP_595465.1	76.9269	119.97	26.6992	43.2693	33.658	50.8377	-0.594761	N	down	No	No	187.18	162.158	68.7554	54.4403	83.3046	71.0354	0.227661	N	up	95.707	148.253	33.672	54.4403	42.2165	65.2063	-0.629947	N	down	210.97	162.444	78.9033	54.4403	93.4066	71.2981	0.382281	N	up	Klla0B	487353
KLLA0B05489g	YML057W;YLR433C	XP_003958964.1	XP_003673231.1;XP_003678506.1	XP_001643967.1	NP_984978.1	SAKL0G17094g	XP_718893.1;XP_718995.1	XP_682089.1	NP_596178.1	72.4515	98.1946	66.2841	92.6491	83.0661	108.858	-0.390589	N	down	No	No	73.6008	79.8228	84.761	85.5307	102.746	111.697	-0.120558	N	down	75.2888	72.9739	83.6343	85.5307	104.923	102.53	0.0345491	N	up	73.0904	79.945	86.1319	85.5307	101.956	112.11	-0.135898	N	down	Klla0B	488386
KLLA0B05511g	YLR432W;YML056C;YHR216W	XP_003958965.1	XP_003673230.1	XP_001643968.1	NP_984977.2	SAKL0G17050g	XP_711803.1;XP_711825.1	NA	NP_595702.1	579.281	564.479	731.414	763.781	924.311	897.495	0.0424956	N	up	No	No	610.259	645.591	874.422	852.467	1060.05	1112.58	-0.0702095	N	down	578.271	590.223	792.71	852.467	994.467	1021.28	-0.0385813	N	down	676.054	646.688	988.482	852.467	1170.28	1116.7	0.0672827	N	up	Klla0B	490221
KLLA0B05533g	YLR431C	XP_003955129.1	XP_003678505.1	XP_001644477.1	NP_984976.1	SAKL0G17006g	NA	NA	NA	25.0615	11.2649	19.0325	8.60514	23.8665	10.109	1.23752	Y	up	No	No	21.7405	20.0304	18.7784	16.2344	22.7666	21.1876	0.0861153	N	up	17.1183	18.3129	14.1206	16.2344	17.7204	19.4489	-0.143157	N	down	16.9638	20.0661	15.0575	16.2344	17.8261	21.266	-0.266088	N	down	Klla0B	493517
KLLA0B05555g	YLR430W	XP_003955130.1	XP_003678504.1	XP_001644478.1	NP_984975.2	SAKL0G16984g	XP_723003.1;XP_723150.1	XP_681940.1	NP_594119.1;NP_596055.1	13.1011	17.8695	50.6342	70.3303	63.5844	82.6434	-0.378461	N	down	No	No	19.3791	19.0264	88.052	79.3587	106.723	103.615	0.0422223	N	up	16.3275	17.3942	70.9243	79.3587	89.0341	95.1116	-0.0962032	N	down	19.3053	19.0567	89.4593	79.3587	105.893	103.999	0.0252663	N	up	Klla0B	494997
KLLA0B05577g	YOR151C	XP_003957533.1	XP_003677897.1	XP_001642238.1	NP_985951.1	SAKL0G04092g	XP_718172.1;XP_718439.1	XP_682389.1	NP_593101.2	88.3679	92.3464	199.512	218.332	251.823	256.542	-0.0267255	N	down	No	No	80.6525	89.9072	219.083	225.449	265.546	294.352	-0.148859	N	down	88.3205	82.1945	230.078	225.449	288.818	270.195	0.0958252	N	up	86.1241	90.0509	238.936	225.449	282.834	295.441	-0.063218	N	down	Klla0B	501690
KLLA0B05599g	YDR405W	XP_003957635.1	XP_003674144.1	XP_001642237.1	NP_985952.1	SAKL0G04114g	XP_718173.1;XP_718440.1	XP_657727.1	NP_592920.1	169.421	181.051	80.5641	90.8735	100.967	106.78	-0.0811455	N	down	No	No	499.932	307.42	220.083	125.231	266.788	163.453	0.704799	N	up	212.575	281.054	89.5115	125.231	112.22	150.04	-0.419369	N	down	630.046	307.938	284.774	125.231	337.11	164.058	1.03705	Y	up	Klla0B	506136
KLLA0B05621g	YGR038W;YLR350W	XP_003955203.1;XP_003958119.1	XP_003673160.1	XP_001643835.1	NP_983215.1	SAKL0B04356g	XP_718021.1;XP_718087.1	XP_659537.1	NP_595290.1	293.151	327.452	87.6704	102.084	110.479	119.958	-0.11876	N	down	No	No	238.197	307.585	88.1921	102.883	106.874	134.379	-0.327088	N	down	307.592	281.191	107.064	102.883	134.416	123.349	0.124842	N	up	250.206	308.044	92.8259	102.883	109.869	134.875	-0.294239	N	down	Klla0B	507613
KLLA0B05643g	YGR037C	XP_003958118.1	XP_003673159.1	XP_001643836.1	NP_983216.1	SAKL0B04334g	NA	XP_663508.1	NP_596820.1	1322.47	2566.29	189.32	394.453	238.207	463.547	-0.960526	N	down	No	No	1288.79	1553.97	197.169	220.24	239.036	287.987	-0.267389	N	down	3028.88	1420.51	446.838	220.24	560.915	264.343	1.08706	Y	up	1143.27	1555.76	179.273	220.24	212.228	289.051	-0.4434	N	down	Klla0B	509019
KLLA0B05665g	YLR347C	XP_003955205.1	XP_003673300.1	XP_001643837.1	NP_983217.2	SAKL0B04312g	XP_713741.1;XP_713775.1	XP_658510.1	NP_594233.1	111.081	127.178	177.67	213.978	224.546	251.434	-0.163088	N	down	No	No	140.695	171.581	264.782	296.322	320.973	386.718	-0.270026	N	down	135.393	156.866	244.565	296.322	306.968	354.983	-0.210516	N	down	137.807	171.876	264.306	296.322	312.94	388.148	-0.311664	N	down	Klla0B	510167
KLLA0B05687g	YGR036C	XP_003958117.1	XP_003673158.1	XP_001643838.1	NP_983218.1	SAKL0B04290g	XP_713742.1;XP_713776.1	XP_664214.1	NP_595325.2	157.444	240.27	47.4426	76.9447	59.9369	90.4227	-0.592959	N	down	No	No	116.492	176.056	49.2035	68.0587	59.6649	88.9048	-0.578827	N	down	232.65	160.948	92.5588	68.0587	116.185	81.6074	0.512133	N	up	155.494	176.314	66.0342	68.0587	78.1742	89.2333	-0.186451	N	down	Klla0B	513579
KLLA0B05709g	YLR345W	XP_003955206.1	XP_003673306.1	XP_001643839.1	NP_983219.1	SAKL0B04268g	XP_713749.1;XP_713750.1;XP_713783.1;XP_713784.1	NA	NP_594678.2	33.1464	8.30504	33.7944	8.92938	42.6762	10.4931	2.02398	Y	up	No	No	50.9232	39.7306	58.2438	42.3412	70.6027	55.2404	0.343701	N	up	27.8021	36.3241	30.9305	42.3412	38.799	50.7076	-0.392666	N	down	34.1735	39.8023	39.9872	42.3412	47.3344	55.4447	-0.238625	N	down	Klla0B	514421
KLLA0B05742g	YLR344W;YGR034W	XP_003958116.1	XP_003673155.1;XP_003678392.1	XP_001643840.1	NP_983220.1	SAKL0B04246g	NA	XP_658174.1	NP_595654.1	1593.32	2386.46	1049	1624.27	1325.79	1908.6	-0.52564	N	down	No	No	1606.39	2135.29	1189.27	1462.45	1441.47	1909.76	-0.405819	N	down	1827.01	1952.08	1306.39	1462.45	1638.85	1753.02	-0.0971039	N	down	1585.52	2138.55	1198.91	1462.45	1419.25	1916.82	-0.433537	N	down	Klla0B	516562
KLLA0B05786g	YGR033C	XP_003958115.1	XP_003673154.1	XP_001643841.1	NP_983221.1	SAKL0B04202g	XP_713751.1;XP_713785.1	XP_663638.1	NP_596833.1	118.481	155.024	51.6371	68.5666	64.9049	80.5669	-0.312141	N	down	No	No	160.252	161.045	67.9078	63.1109	82.3488	82.3511	-0.0102465	N	down	120.609	147.235	48.9763	63.1109	61.3735	75.5934	-0.301962	N	down	134.588	161.326	58.4771	63.1109	69.2274	82.6556	-0.262118	N	down	Klla0B	519156
KLLA0B05808g	YLR343W	XP_003955207.1	XP_003678393.1	XP_001642213.1	NP_983222.1	SAKL0B04180g	XP_713753.1;XP_713787.1;XP_717233.1;XP_717309.1;XP_718939.1;XP_719043.1	XP_661334.1;XP_680780.1;XP_682215.1	NP_594765.1;NP_594938.1;NP_596053.1	18.3638	8.54668	18.55	8.97886	23.4462	10.5519	1.15242	Y	up	No	No	16.4945	5.07352	18.1592	5.47704	21.994	7.16607	1.67931	Y	up	3.50556	4.63764	3.92984	5.47704	4.92589	6.57764	-0.368338	N	down	20.5502	5.07873	23.2451	5.47704	27.5209	7.19251	1.9969	Y	up	Klla0B	520133
KLLA0B05841g	YGR032W;YLR342W	XP_003955208.1;XP_003958114.1	XP_003673153.1;XP_003678394.1	XP_001643842.1	NP_983223.2	SAKL0B04158g	XP_721157.1;XP_721429.1	XP_661333.1	NP_588501.1;NP_594032.1;NP_594766.1;NP_595971.1	273.007	240.684	964.601	901.502	1219.82	1059.4	0.203436	N	up	No	No	210.403	231.801	898.123	913.345	1088.78	1192.36	-0.131382	N	down	186.346	211.917	762.176	913.345	956.826	1094.5	-0.194096	N	down	203.092	232.178	884.003	913.345	1046.45	1196.77	-0.193796	N	down	Klla0B	522241
KLLA0B05863g	YGR031W	XP_003958113.1	XP_003673152.1	XP_001642801.1	NP_983224.2	SAKL0B04136g	XP_713956.1;XP_714014.1	XP_657929.1	NP_593115.1	35.8027	33.4327	24.2826	23.6349	30.4235	27.7699	0.130528	N	up	No	No	79.9921	58.7257	56.7136	37.6281	68.7355	49.1086	0.479481	N	up	34.4468	53.6893	23.6114	37.6281	29.5822	45.0786	-0.607607	N	down	87.8243	58.8262	62.4652	37.6281	73.9308	49.2902	0.577013	N	up	Klla0B	529188
KLLA0B05885g	NA	NA	NA	NA	NP_983225.2	SAKL0B04114g	NA	NA	NA	24.981	1.41048	28.9279	1.65658	36.3016	1.94714	4.2182	Y	up	Yes	No	27.709	0.45244	39.0633	0.603391	47.3492	0.784523	5.75726	Y	up	0.593071	0.413732	0.768489	0.603391	NA	NA	NA	NA	NA	54.9706	0.453637	78.6344	0.603391	93.0836	0.787433	6.72898	Y	up	Klla0B	530762
KLLA0B05918g	YLR340W	XP_003958112.1	XP_003673151.1	XP_001642798.1	NP_983226.2	SAKL0B04092g	XP_720309.1	XP_660338.1	NP_588393.1	1208.77	1671.41	879.206	1349.72	1120.65	1586.04	-0.50106	N	down	No	No	1760.35	2397.1	1071.01	1350.62	1298.08	1762.29	-0.441294	N	down	1983.37	2191.55	1158.96	1350.62	1454.38	1617.68	-0.153736	N	down	1800.03	2401.35	1119.56	1350.62	1325.42	1768.81	-0.416623	N	down	Klla0B	533071
KLLA0B05973g	YGR030C	XP_003958111.1	XP_003673150.1	XP_001643843.1	NP_983227.1	SAKL0B04026g	NA	NA	NA	35.0458	54.8469	7.83937	12.6042	9.77863	14.8091	-0.601278	N	down	No	No	66.4219	69.0061	15.2368	14.3001	18.454	18.6795	0.0107581	N	up	46.7932	63.0831	10.1794	14.3001	12.776	17.1463	-0.41746	N	down	83.3512	69.1016	19.6948	14.3001	23.3272	18.7486	0.327611	N	up	Klla0B	534679
KLLA0B05995g	NA	NA	NA	NA	NA	SAKL0B04004g	XP_710539.1;XP_710550.1;XP_719135.1;XP_719252.1	XP_658471.1;XP_660485.1;XP_661726.1	NA	308.972	115.559	253.963	97.4082	318.823	114.469	1.4777	Y	up	Yes	No	428.284	325.037	422.878	296.694	512.953	387.687	0.403815	N	up	331.218	297.137	314.047	296.694	393.928	355.863	0.147679	N	up	243.025	325.481	245.178	296.694	290.256	389.119	-0.421482	N	down	Klla0B	535752
KLLA0B06039g	YLR337C	XP_003955210.1	XP_003678400.1	XP_001643844.1	NP_982984.2;NP_982984.2	SAKL0B03938g;SAKL0B03938g	XP_715972.1;XP_716030.1	NA	NP_596264.1;NP_596264.1	9.16749	10.3011	10.6973	13.2324	13.688	15.5483	-0.181476	N	down	No	No	11.3635	17.2236	14.8813	20.2115	18.0392	26.3864	-0.556065	N	down	14.9943	15.7461	18.496	20.2115	23.2293	24.2209	-0.0655308	N	down	12.5598	17.2511	17.2344	20.2115	20.4017	26.484	-0.380728	N	down	Klla0B	538539
KLLA0B06061g	YGR029W	XP_003955211.1;XP_003958110.1	XP_003673149.1;XP_003678399.1	XP_001642797.1	NP_982983.3	SAKL0B03916g	NA	XP_660631.1	NP_594974.1	50.9589	46.9381	23.5487	23.2483	29.9029	27.3165	0.131704	N	up	No	No	111.876	86.8104	49.962	34.8118	60.5775	45.4421	0.405338	N	up	52.465	79.3632	22.3289	34.8118	27.9978	41.7128	-0.575824	N	down	142.375	86.9488	64.0416	34.8118	75.8247	45.6101	0.729094	N	up	Klla0B	540386
KLLA0B06094g	YGR028W	XP_003958109.1	XP_003673148.1	XP_001642796.1	NP_982982.2	SAKL0B03894g	XP_715087.1;XP_715138.1	XP_664651.1	NP_588013.1	68.5768	64.3331	39.8532	38.9374	50.1193	45.7493	0.131364	N	up	No	No	97.5195	86.9213	70.4855	57.5188	85.4178	75.0931	0.18646	N	up	68.3816	79.4651	47.4212	57.5188	59.4742	68.9303	-0.212948	N	down	123.97	87.0621	90.8519	57.5188	107.567	75.3707	0.511873	N	up	Klla0B	541408
KLLA0B06116g	YLR336C	XP_003955212.1	XP_003678398.1	XP_001643845.1	NP_982981.3	SAKL0B03872g	XP_715088.1;XP_715139.1	XP_662185.1	NP_594036.1	4.94222	14.8004	11.2263	33.5642	14.0397	39.4344	-1.49109	Y	down	No	No	10.7514	10.4933	25.1718	22.3854	30.4769	29.2095	0.0701817	N	up	7.12656	9.59354	15.9996	22.3854	20.0565	26.8126	-0.423927	N	down	17.9812	10.5119	42.4901	22.3854	50.3104	29.3175	0.766336	N	up	Klla0B	543019
KLLA0B06138g	YLR335W	XP_003955213.1	XP_003678397.1	XP_001642795.1	NP_982980.2	SAKL0B03850g	XP_711417.1	XP_663089.1	NP_587937.2	27.6617	46.3201	41.4256	72.3538	52.1711	85.0158	-0.704649	N	down	No	No	41.2984	54.1085	57.999	69.6652	70.2874	90.9699	-0.369336	N	down	49.8314	49.4661	66.3656	69.6652	83.3296	83.5037	-0.00354084	N	down	45.4534	54.1922	65.28	69.6652	77.2917	91.3062	-0.239087	N	down	Klla0B	546274
KLLA0B06182g	YGR027C;YLR333C	XP_003955214.1;XP_003958105.1	XP_003678396.1	XP_001644625.1;XP_001645644.1	NP_982979.1	SAKL0B03806g	XP_711416.1	XP_658559.1	NP_594485.1;NP_595515.1	12189.1	16176.8	1574.99	2321.53	1989.49	2727.94	-0.4554	N	down	No	No	15370.9	18418.8	1744.87	1940.22	2114.96	2533.38	-0.260455	N	down	16019.5	16838.6	1759.74	1940.22	2207.55	2325.46	-0.0750546	N	down	14309.4	18447.7	1672.92	1940.22	1980.37	2542.74	-0.360625	N	down	Klla0B	549795
KLLA0B06215g	YGR026W	XP_003958106.1	XP_003673147.1	XP_001645643.1	NP_982978.2	SAKL0B03718g	XP_713497.1;XP_713538.1	NA	NA	412.074	407.993	156.735	162.623	196.786	191.095	0.0422157	N	up	No	No	309.036	367.853	157.439	172.002	190.812	224.685	-0.234236	N	down	375.421	336.284	183.639	172.002	230.582	206.243	0.161612	N	up	258.326	368.385	134.176	172.002	158.864	225.515	-0.503617	N	down	Klla0B	551524
KLLA0B06237g	YGR024C	XP_003958107.1	NA	XP_001644624.1	NP_982977.1	SAKL0B03696g	XP_720355.1	XP_658408.1	NP_587981.1	96.3701	152.871	26.5848	43.6094	33.5185	51.2444	-0.61219	N	down	No	No	138.499	129.234	58.0126	50.0305	70.2831	65.312	0.109619	N	up	92.8968	118.147	37.3634	50.0305	46.8446	59.952	-0.35577	N	down	150.449	129.44	65.0336	50.0305	76.9934	65.5534	0.229341	N	up	Klla0B	552909
KLLA0B06259g	NA	XP_003958108.1	XP_003673146.1	XP_001645642.1	NP_982976.2	SAKL0B03674g	NA	XP_664661.1	NA	39.4689	40.4626	26.4907	27.5681	33.1822	32.3878	0.0338412	N	up	No	No	58.7219	44.7703	44.6669	31.5591	54.1578	41.2132	0.389858	N	up	39.1499	40.9288	28.4731	31.5591	35.6766	37.8307	-0.0802432	N	down	63.628	44.8379	49.3228	31.5591	58.3903	41.3656	0.499979	N	up	Klla0B	553658
KLLA0B06303g	YPR010C	XP_003956459.1	XP_003675778.1	XP_001645652.1	NP_982975.2	SAKL0B03542g	XP_720354.1	XP_661537.1	NP_595819.2	82.3728	129.545	186.694	307.025	234.188	360.73	-0.623314	N	down	No	No	113.808	101.683	304.149	250.842	368.506	327.232	0.170669	N	up	61.6429	92.965	158.132	250.842	198.266	300.382	-0.600156	N	down	147.025	101.869	399.927	250.842	473.478	328.443	0.525872	N	up	Klla0B	555780
KLLA0B06347g	YKL096W	XP_003957107.1	XP_003673714.1;XP_003673715.1	XP_001643423.1	NP_982971.2;NP_982972.1;NP_982974.2;NP_983674.1;NP_983675.1;NP_983698.1;XP_002999506.1	SAKL0E02640g;SAKL0E02706g;SAKL0E02728g	NA	XP_681602.1	NP_594617.1	210.437	146.695	98.8822	74.9717	124.345	88.1104	0.496951	N	up	No	No	384.669	216.589	178.043	93.2411	215.709	121.737	0.826649	N	up	185.305	198.009	81.7258	93.2411	102.603	111.746	-0.124283	N	down	253.557	216.936	120.42	93.2411	142.556	122.187	0.221756	N	up	Klla0B	561565
KLLA0B06369g	YKL095W	XP_003957108.1	XP_003673472.1	XP_001643422.1	NP_982970.1	SAKL0E02618g;SAKL0E02684g	XP_717742.1;XP_717836.1	XP_681270.1	XP_001713052.1	8.98206	14.1672	4.55719	7.18536	5.71331	8.44083	-0.565918	N	down	No	No	30.2934	19.314	15.058	8.91772	18.2261	11.6139	0.635618	N	up	14.82	17.6602	7.20518	8.91772	9.03157	10.6613	-0.265662	N	down	29.0947	19.3586	14.8795	8.91772	17.6175	11.6569	0.55341	N	up	Klla0B	562846
KLLA0B06391g	YKL094W	XP_003957109.1	XP_003673474.1	XP_001643421.1	NA	SAKL0E02596g	XP_723360.1;XP_723549.1	XP_664687.1	NP_587904.1	127.613	101.712	75.2211	62.1825	94.8751	73.0767	0.376674	N	up	No	No	142.891	132.951	86.0491	73.5169	104.33	96.0324	0.1194	N	up	156.979	121.542	90.6808	73.5169	113.748	88.15	0.370876	N	up	114.076	133.146	70.2975	73.5169	83.2195	96.3872	-0.208085	N	down	Klla0B	563851
KLLA0B06413g	YKL093W;YMR081C	XP_003957110.1	XP_003673475.1;XP_003673713.1	NA	NP_982969.1	SAKL0E02574g	NA	NA	NA	529	676.622	300.162	405.164	382.647	476.056	-0.315001	N	down	No	No	406.723	563.891	264.326	338.423	321.039	442.144	-0.463423	N	down	521.094	515.494	327.192	338.423	410.473	405.851	0.0171277	N	up	235.047	564.688	157.122	338.423	186.042	443.777	-1.25296	Y	down	Klla0B	566429
KLLA0B06435g	YMR080C	XP_003954768.1	XP_003673712.1	XP_001642437.1	NP_982968.4	SAKL0E02552g	XP_716778.1;XP_716838.1	XP_658250.1	NP_593080.1	47.2445	62.2483	87.467	118.554	109.737	139.289	-0.34412	N	down	No	No	58.1274	57.289	125.423	114.098	151.979	148.838	0.0279186	N	up	39.0039	52.3775	80.8405	114.098	101.408	136.626	-0.432967	N	down	64.2793	57.3943	141.678	114.098	167.721	149.389	0.162725	N	up	Klla0B	567908
KLLA0B06457g	YKL092C	XP_003957111.1	XP_003673476.1	XP_001642362.1	NP_982967.2	SAKL0E02530g	XP_716779.1;XP_716839.1	XP_661339.1	NP_595370.1	27.2209	29.0146	51.8724	55.6603	65.5673	65.4054	0.00396895	N	up	No	No	28.9799	30.7024	69.533	68.0525	84.2787	88.8402	-0.0781092	N	down	26.3373	28.0689	60.8237	68.0525	76.2582	81.5492	-0.0967227	N	down	29.8508	30.7529	73.8387	68.0525	87.3912	89.1686	-0.0316838	N	down	Klla0B	570933
KLLA0B06479g	YMR079W;YKL091C	XP_003954767.1	XP_003676923.1	XP_001642363.1	NP_982966.2	SAKL0E02508g	XP_716780.1;XP_716840.1	XP_662601.1	NP_593003.1	254.778	250.034	151.827	158.434	191.422	186.163	0.0402308	N	up	No	No	242.578	295.382	146.418	164.289	177.418	214.492	-0.272744	N	down	277.917	270.042	160.446	164.289	201.411	196.889	0.0321871	N	up	246.164	295.854	151.364	164.289	179.247	215.285	-0.264284	N	down	Klla0B	575030
KLLA0B06501g	YJR059W;YKL198C	XP_003957233.1;XP_003957322.1	XP_003674159.1;XP_003677581.1	XP_001644496.1;XP_001644677.1	NA	SAKL0D12628g	XP_716664.1;XP_716724.1	NA	NA	51.1321	51.1513	90.4288	95.5108	114.393	112.226	0.0277779	N	up	No	No	52.0943	71.5305	92.4312	116.565	112.04	152.284	-0.440928	N	down	87.6062	65.3913	147.887	116.565	185.576	139.784	0.410816	N	up	47.0728	71.6316	85.1776	116.565	100.848	152.846	-0.596622	N	down	Klla0B	576636
KLLA0B06523g	YKL197C	XP_003957323.1	XP_003677580.1	XP_001644678.1	NP_985918.2	SAKL0D12606g	XP_720794.1;XP_721303.1	XP_663595.1	NP_587770.1	7.74785	10.2739	16.7012	22.8698	21.0706	26.8707	-0.350905	N	down	No	No	11.7276	18.8033	25.9259	38.376	31.4381	50.1023	-0.684534	N	down	16.8144	17.1903	35.5652	38.376	44.6525	45.9904	-0.0453946	N	down	10.9283	18.8335	24.5091	38.376	29.0214	50.2875	-0.793202	N	down	Klla0B	579869
KLLA0B06545g	YJR058C	XP_003957324.1	XP_003677579.1	XP_001643598.1	NP_985917.1	SAKL0D12584g	XP_713006.1;XP_713040.1	XP_658326.1;XP_680951.1	NP_593410.1;NP_596138.1	149.529	121.121	25.2947	21.1421	31.9703	24.8418	0.364228	N	up	No	No	122.164	121.938	24.8444	21.9863	30.1299	28.7188	0.062714	N	up	128.544	111.473	24.1661	21.9863	30.3172	26.3616	0.208456	N	up	96.8593	122.113	19.8634	21.9863	23.5096	28.8249	-0.287912	N	down	Klla0B	583095
KLLA0B06556g	YJR057W	XP_003957232.1	XP_003677578.1	XP_001644495.1	NP_985916.1	SAKL0D12562g	XP_713007.1;XP_713041.1	XP_681482.1	NP_588542.1	72.1209	79.5541	22.5293	25.878	28.3501	30.4084	-0.1015	N	down	No	No	84.6342	85.0086	28.4247	26.317	34.4349	34.3769	0.0188559	N	up	82.2804	77.7135	26.2977	26.317	33.0126	31.5552	0.0696724	N	up	74.7381	85.1326	25.9219	26.317	30.6812	34.504	-0.162646	N	down	Klla0B	583538
KLLA0B06622g	YFR028C	XP_003954665.1	XP_003673843.1;XP_003675183.1	XP_001643547.1	NP_984836.2	SAKL0D09988g	XP_711244.1;XP_711268.1	XP_662661.1	NP_594716.1	49.3184	69.7341	44.8382	65.0767	56.6455	76.4637	-0.432572	N	down	No	No	67.2852	71.2065	71.7721	70.0196	87.0188	91.4058	-0.0766091	N	down	61.8837	65.0981	63.6706	70.0196	79.8854	83.9043	-0.0722595	N	down	67.0974	71.3207	73.3566	70.0196	86.8434	91.7437	-0.0814475	N	down	Klla0B	584889
KLLA0B06644g	YFR027W	XP_003956563.1	XP_003675182.1	XP_001643546.1	NP_984837.2	SAKL0D09966g	XP_717518.1;XP_717591.1	XP_660362.1	NA	14.7559	19.307	7.93894	10.4568	10.0065	12.2912	-0.296452	N	down	No	No	18.855	16.7146	10.3674	8.79905	12.5532	11.4843	0.148528	N	up	19.6659	15.2815	10.6753	8.79905	13.3896	10.5419	0.336947	N	up	16.8069	16.7447	10.0252	8.79905	11.8687	11.5268	0.0302911	N	up	Klla0B	586591
KLLA0B06710g	YDR020C	XP_003957404.1	XP_003673981.1	XP_001647120.1	NP_985262.1	SAKL0D03982g	XP_718508.1;XP_718591.1	NA	NA	52.1982	47.9864	14.1643	13.1066	17.7985	15.4002	0.20776	N	up	No	No	49.3108	55.2943	17.8575	18.5885	21.6356	24.2754	-0.151999	N	down	48.0921	50.5499	16.9505	18.5885	21.243	22.283	-0.0628552	N	down	43.3021	55.3784	16.0559	18.5885	19.0151	24.3651	-0.350074	N	down	Klla0B	588821
KLLA0B06732g	YBR044C	XP_003956190.1	XP_003678185.1	XP_001645320.1	NP_985261.1	SAKL0D04004g	NA	NA	NA	43.6271	41.8553	42.0741	41.7208	53.1569	49.0173	0.117265	N	up	No	No	85.1873	59.7253	107.642	69.5292	130.467	90.7548	0.520895	N	up	37.578	54.6024	45.643	69.5292	57.2377	83.307	-0.542418	N	down	125.748	59.8239	161.759	69.5292	191.494	91.0904	1.06874	Y	up	Klla0B	589699
KLLA0B06754g	YDR019C	XP_003957403.1	XP_003673980.1	XP_001647121.1	NA	SAKL0D04026g	XP_719084.1;XP_719201.1	XP_658802.1	NP_594015.1	114.383	68.9753	89.333	55.5272	111.939	65.2431	0.778399	N	up	No	No	98.8417	72.205	77.9172	52.1514	94.4734	68.1204	0.471557	N	up	61.3518	66.0084	46.6936	52.1514	58.6247	62.5291	-0.0911106	N	down	86.3994	72.3095	69.3672	52.1514	82.1159	68.3722	0.26877	N	up	Klla0B	592003
KLLA0B06776g	YLL061W;YPL274W	XP_003955457.1;XP_003958171.1	NA	NA	NP_985260.2	SAKL0D04048g	XP_711412.1;XP_711447.1;XP_711464.1;XP_713900.1;XP_714102.1;XP_714611.1;XP_714743.1;XP_720611.1;XP_720739.1;XP_722151.1;XP_722265.1	XP_659263.1;XP_663282.1	NP_594316.1;NP_595000.1;NP_595008.3;NP_595051.2;NP_595053.1;NP_596348.1;NP_596849.1	36.8121	89.0279	34.9871	90.0052	44.5793	105.769	-1.24546	Y	down	No	No	51.7548	67.9626	65.1082	78.9709	78.9202	103.18	-0.383345	N	down	108.557	62.1295	130.896	78.9709	164.253	94.7105	0.797869	N	up	96.0533	68.0581	123.424	78.9709	146.134	103.561	0.501712	N	up	Klla0B	594172
KLLA0B06798g	YBR043C	NA	NA	NA	NP_983232.1	SAKL0D04070g	XP_714064.1;XP_714342.1	XP_663260.1;XP_663260.1;XP_663260.1;XP_663260.1	NA	82.1353	31.9408	84.7504	33.8909	107.026	39.8218	1.42639	Y	up	Yes	No	40.7171	42.1634	57.7911	55.2275	70.0461	72.1223	-0.0407319	N	down	36.1412	38.5458	48.9696	55.2275	61.4652	66.2029	-0.106455	N	down	38.3694	42.2281	55.4517	55.2275	65.6391	72.3889	-0.139792	N	down	Klla0B	596500
KLLA0B06820g	YBR042C	XP_003956191.1	XP_003673979.1;XP_003678186.1	XP_001645319.1;XP_001647122.1	NP_983231.1	SAKL0D04092g	XP_714065.1;XP_714343.1	NA	NP_595192.1	58.0675	27.8227	37.915	18.9591	48.1716	22.2772	1.11329	Y	up	Yes	No	43.8999	54.7638	35.2813	40.3434	42.7762	52.7021	-0.301482	N	down	51.1003	50.0636	39.6717	40.3434	49.7886	48.3763	0.0461746	N	up	38.5438	54.8414	31.7039	40.3434	37.5333	52.8969	-0.487272	N	down	Klla0B	598869
KLLA0B06842g	YBR041W	XP_003956192.1	XP_003678187.1	XP_001647123.1	NP_983230.2	SAKL0D04114g	XP_711325.1;XP_711373.1	XP_662796.1;XP_664253.1	NP_588549.1	50.4652	58.6674	60.4912	74.0369	76.3786	87.0007	-0.187691	N	down	No	No	48.6172	64.9102	70.1329	86.4267	85.055	112.938	-0.410361	N	down	69.8327	59.3383	96.6169	86.4267	121.243	103.667	0.229783	N	up	49.2436	64.9979	72.4266	86.4267	85.7455	113.355	-0.397407	N	down	Klla0B	600154
KLLA0B06864g	YBR040W	XP_003956193.1	XP_003678188.1	XP_001645318.1	NP_983229.2	SAKL0D04136g	XP_714066.1;XP_714344.1	NA	NP_594007.2	44.2712	29.8	16.1109	11.1816	20.3886	13.1407	0.634706	N	up	No	No	28.4012	22.817	16.6112	12.5554	20.1334	16.4066	0.312844	N	up	18.573	20.8589	10.7199	12.5554	13.4494	15.0598	-0.14753	N	down	26.6961	22.8502	15.617	12.5554	18.4842	16.4672	0.184468	N	up	Klla0B	602511
KLLA0B06886g	YBR039W	XP_003956194.1	XP_003678189.1	XP_001647124.1	NP_983228.2	SAKL0D04158g	XP_717849.1	XP_657856.1	NP_595430.1	1018.38	776.261	629.749	524.201	793.671	615.944	0.365741	N	up	No	No	1188.86	1348.59	660.966	695.919	800.883	908.322	-0.181562	N	down	930.324	1232.93	498.9	695.919	626.022	833.781	-0.413706	N	down	832.239	1350.86	474.381	695.919	561.714	911.68	-0.698946	N	down	Klla0B	604332
KLLA0B06952g	YDR017C	XP_003957402.1	XP_003673978.1	XP_001645317.1	NA	SAKL0D04246g	XP_710265.1;XP_710272.1	XP_664484.1	NP_587847.1	20.1726	31.1278	34.9538	55.8433	44.0693	65.6194	-0.574309	N	down	No	No	23.7444	25.9528	46.258	46.4874	56.0657	60.6829	-0.117292	N	down	24.8173	23.7267	46.1673	46.4874	57.9361	55.7029	0.0537264	N	up	23.6609	25.9953	47.0838	46.4874	55.7411	60.9073	-0.131789	N	down	Klla0B	606694
KLLA0B06974g	YDR016C	XP_003957401.1	XP_003673977.1	XP_001645316.1	NP_982728.1	SAKL0D04268g	NA	XP_660290.1	NP_594045.2	126.981	115.199	11.8818	11.4818	14.9135	13.4944	0.143446	N	up	No	No	207.848	129.789	19.4309	11.8013	23.5502	15.4115	0.616389	N	up	142.217	118.655	12.2531	11.8013	15.3645	14.1466	0.124921	N	up	208.682	129.994	19.2417	11.8013	22.7794	15.4685	0.562725	N	up	Klla0B	610375
KLLA0B07040g	YOR390W;YPL279C	XP_003957399.1	XP_003673975.1	XP_001647126.1	NA	SAKL0D04378g	XP_720386.1	XP_659736.1	NP_001018767.1;NP_592783.1	103.616	112.734	52.488	60.6973	66.403	71.3231	-0.10277	N	down	No	No	91.0166	123.431	62.4567	76.7094	75.7223	100.234	-0.403114	N	down	135.789	112.835	88.2974	76.7094	110.785	92.0065	0.272225	N	up	100.523	123.597	69.3677	76.7094	82.1259	100.605	-0.286915	N	down	Klla0B	613103
KLLA0B07062g	YBR035C	XP_003956196.1	XP_003678191.1	XP_001644128.1	NP_982729.1	SAKL0D04400g	XP_717413.1;XP_717507.1	XP_659914.1	NP_594650.1	598.777	565.845	230.985	232.334	293.323	273.031	0.103553	N	up	No	No	371.533	564.045	147.91	203.372	179.462	265.898	-0.568172	N	down	847.998	515.606	320.324	203.372	402.117	244.068	0.722095	N	up	278.058	564.714	112.67	203.372	133.405	266.88	-0.997755	N	down	Klla0B	614589
KLLA0B07084g	YDR014W	XP_003957398.1	XP_003673974.1	XP_001644127.1	NP_982730.1	SAKL0D04422g	NA	NA	NA	8.35201	7.20232	11.2338	9.73629	14.1214	11.4401	0.302728	N	up	No	No	11.075	8.03065	16.0816	12.2449	19.4612	15.986	0.309557	N	up	7.85619	7.3419	14.9965	12.2449	18.8106	14.6741	0.356357	N	up	11.3216	8.04425	16.4852	12.2449	19.5156	16.0451	0.277995	N	up	Klla0B	615326
KLLA0B07095g	YDR013W	XP_003957397.1	XP_003673973.1	XP_001644126.1	NP_982731.1	SAKL0D04444g	XP_712482.1	XP_661270.1	NP_595821.1	20.424	27.6322	7.55556	10.767	9.44368	12.6514	-0.423607	N	down	No	No	29.3795	27.249	11.6734	9.84994	14.1504	12.8522	0.117553	N	up	26.1547	24.9127	9.97327	9.84994	12.5051	11.7975	0.072483	N	up	36.5247	27.2982	14.4753	9.84994	17.1405	12.8997	0.39299	N	up	Klla0B	617330
KLLA0B07117g	YBR034C	XP_003956197.1	XP_003673972.1;XP_003678190.1	XP_001645315.1	NP_982733.1	SAKL0D04466g	XP_718114.1;XP_718383.1	XP_660700.1	NP_594825.2	153.458	244.167	84.8587	141.116	106.281	165.799	-0.641841	N	down	No	No	168.747	179.828	118.767	115.663	143.884	150.984	-0.0677316	N	down	145.083	164.403	97.3179	115.663	122.113	138.593	-0.183826	N	down	212.829	180.124	151.862	115.663	179.782	151.542	0.244973	N	up	Klla0B	618368
KLLA0B07139g	YBR031W;YDR012W	XP_003957396.1	XP_003673971.1	XP_001644125.1	NP_982734.1	SAKL0D04488g	XP_715018.1	XP_681445.1	NP_595879.1;NP_596510.1	2794.42	3611.52	2354.3	3441.51	2990.66	4043.84	-0.435251	N	down	No	No	4826.05	6093.25	3439.56	4000.77	4167.32	5219.97	-0.32493	N	down	4992.12	5570.79	3416.08	4000.77	4286.32	4791.63	-0.160846	N	down	4963.78	6104.12	3599.41	4000.77	4261.57	5239.27	-0.298079	N	down	Klla0B	620003
KLLA0B07161g	YBR030W	XP_003957395.1	XP_003673970.1	XP_001644124.1	NP_982736.1	SAKL0D04532g	XP_715024.1	XP_680609.1	NP_596799.2	5.05628	17.5239	5.53928	19.2842	6.93699	22.6507	-1.70953	Y	down	No	No	21.9707	17.2741	25.8833	18.5743	31.3636	24.2221	0.358772	N	up	9.92386	15.7935	10.7997	18.5743	13.5406	22.2348	-0.726865	N	down	30.808	17.3073	36.6394	18.5743	43.3644	24.3118	0.811674	N	up	Klla0B	621391
KLLA0B07183g	YKL167C	XP_003958215.1	XP_003675284.1	XP_001646861.1	NP_984745.1	SAKL0C05346g	XP_720828.1;XP_721341.1	XP_661305.1	XP_002788951.1	148.889	143.719	24.6299	25.4428	30.8591	29.8976	0.0446717	N	up	No	No	453.123	279.153	82.0977	46.4246	99.4894	60.566	0.709206	N	up	174.703	255.215	30.0689	46.4246	37.6935	55.5962	-0.564463	N	down	519.108	279.641	96.5482	46.4246	114.304	60.79	0.901717	N	up	Klla0B	623544
KLLA0B07205g	YJL164C;YKL166C;YPL203W	XP_003957912.1;XP_003958216.1;XP_003959523.1	XP_003673061.1;XP_003675283.1;XP_003678294.1	XP_001645602.1;XP_001646862.1	NP_984746.2;NP_985458.1	SAKL0A04466g;SAKL0C05368g	XP_714804.1;XP_714866.1;XP_723386.1;XP_723574.1	XP_663909.1	NP_595159.1	115.686	59.003	91.8466	48.3929	116.231	56.871	1.03153	Y	up	Yes	No	93.5388	99.312	88.0622	86.8026	106.779	113.313	-0.0908344	N	down	85.3551	90.793	77.8027	86.8026	97.6627	104.014	-0.0928108	N	down	101.728	99.4733	98.9426	86.8026	117.136	113.732	0.0406277	N	up	Klla0B	624606
KLLA0B07227g	YJL163C	XP_003958217.1	XP_003675282.1	XP_001646382.1	NP_984747.1	SAKL0C05412g	XP_714682.1	XP_663948.1	NP_594912.1	26.2539	31.4298	27.3758	34.1536	34.2987	40.1338	-0.227258	N	down	No	No	31.0573	31.4188	41.0778	38.5953	49.7813	50.3626	-0.022133	N	down	28.0605	28.7247	35.8901	38.5953	45.0267	46.2299	-0.0443534	N	down	34.1066	31.4744	46.4644	38.5953	55.0041	50.5489	0.112324	N	up	Klla0B	627833
KLLA0B07249g	YKL165C	XP_003958218.1	XP_003675281.1	NA	NP_984748.2	SAKL0C05434g	XP_716313.1;XP_716375.1	XP_664653.1	NP_595248.1	34.2909	46.1371	47.4824	65.9759	59.7553	77.5345	-0.37585	N	down	No	No	24.5867	30.8314	49.1893	57.123	59.6119	74.6058	-0.318811	N	down	31.4891	28.1859	60.1692	57.123	75.5532	68.4824	0.142516	N	up	28.243	30.8778	57.7676	57.123	68.3887	74.8815	-0.127564	N	down	Klla0B	630336
KLLA0B07271g	YJL162C	XP_003957913.1	XP_003678293.1	XP_001646381.1	NP_984749.1	SAKL0C05456g	NA	XP_658496.1;XP_663837.1	NP_587977.2;NP_587986.1;NP_595124.1;NP_595625.1	8.78712	10.5142	13.0089	15.865	16.3361	18.6444	-0.191386	N	down	No	No	16.8389	16.9347	23.47	21.8906	28.4504	28.5444	-0.0236217	N	down	16.7106	15.4832	22.5446	21.8906	28.297	26.2024	0.0952841	N	up	14.7287	16.9673	20.9208	21.8906	24.7635	28.65	-0.230218	N	down	Klla0B	633724
KLLA0B07337g	YJL161W	NA	NA	NA	NA	SAKL0C05522g	NA	NA	NA	72.7221	43.5031	19.2321	11.7377	24.1601	13.7928	0.807765	N	up	No	No	67.3686	59.932	19.6887	15.8526	23.8693	20.7193	0.216538	N	up	65.1346	54.7866	18.2804	15.8526	22.9302	19.0184	0.286376	N	up	64.8691	60.0093	18.6992	15.8526	22.1427	20.7958	0.113177	N	up	Klla0B	637267
KLLA0B07370g	YKL163W;YJL160C	XP_003957914.1;XP_003958219.1;XP_003958220.1	XP_003675279.1;XP_003675280.1;XP_003678291.1	XP_001646378.1;XP_001646863.1;XP_001646864.1;XP_001646865.1	NP_984750.1;NP_984751.1	NA	XP_712576.1;XP_712603.1	NA	NA	146.293	82.6791	114.435	71.2241	145.527	83.6868	0.79847	N	up	No	No	377.479	468.074	218.757	251.741	265.099	328.379	-0.309905	N	down	267.436	427.945	148.227	251.741	185.91	301.434	-0.698336	N	down	255.498	468.936	150.816	251.741	178.558	329.594	-0.886074	N	down	Klla0B	638135
KLLA0B07392g	YJL159W;YKL164C;YKL163W	XP_003957914.1;XP_003958219.1;XP_003958220.1	XP_003675279.1;XP_003675280.1;XP_003678291.1	XP_001646379.1;XP_001646864.1;XP_001646865.1	NP_984750.1	SAKL0C05544g;SAKL0C05566g	XP_712576.1;XP_712603.1	NA	NA	1876.45	1493.75	2249.5	2024.4	2858.86	2378.71	0.265276	N	up	No	No	2423.55	3167.52	1793.85	2174.85	2173.61	2838.79	-0.385147	N	down	2511.48	2895.84	1797.54	2174.85	2257.65	2605.83	-0.207012	N	down	2489.14	3172.81	1882.03	2174.85	2228.81	2849.29	-0.354384	N	down	Klla0B	641481
KLLA0B07447g	YJL158C;YJL160C	XP_003957914.1;XP_003957915.1	XP_003678292.1	XP_001646378.1;XP_001646380.1;XP_001646863.1	NP_984751.1;NP_984758.1	NA	XP_711725.1;XP_711747.1	NA	NA	36.9952	118.643	25.1786	86.3471	31.565	101.465	-1.68537	Y	down	No	No	175.886	340.015	93.3726	166.053	113.113	216.654	-0.936236	N	down	183.885	310.861	94.2231	166.053	118.313	198.876	-0.75156	N	down	146.408	340.624	79.3452	166.053	93.9435	217.455	-1.21321	Y	down	Klla0B	643757
KLLA0B07469g	YJL157C	XP_003957916.1;XP_003957916.1;XP_003957916.1;XP_003957916.1	XP_003678289.1	XP_001646377.1;XP_001646377.1;XP_001646377.1;XP_001646377.1	NP_984757.2;NP_984757.2;NP_984757.2;NP_984757.2	SAKL0C05698g;SAKL0C05698g;SAKL0C05698g;SAKL0C05698g	XP_712259.1;XP_720396.1;XP_720396.1;XP_720396.1;XP_720396.1;XP_720396.1;XP_720396.1;XP_720396.1;XP_720396.1;XP_720396.1	XP_662241.1;XP_662771.1;XP_662771.1	NA	7.49965	5.27171	13.122	9.58163	16.4378	11.2587	0.544462	N	up	No	No	6.90252	6.05159	13.2459	10.786	16.054	14.0992	0.212627	N	up	5.17123	5.53194	9.5211	10.786	11.9368	12.9417	-0.093645	N	down	7.89812	6.05897	15.5463	10.786	18.3999	14.1513	0.404099	N	up	Klla0B	645646
KLLA0B07491g	YJL156C	NA	XP_003678288.1	NA	NP_984756.1	SAKL0C05720g	XP_716177.1;XP_716260.1	XP_663736.1	NA	188.27	85.2988	240.389	114.957	303.443	135.06	1.16782	Y	up	Yes	No	217.959	162.689	327.362	226.404	396.91	295.575	0.424191	N	up	116.044	148.733	168.322	226.404	211.123	271.317	-0.361938	N	down	141.768	162.952	217.584	226.404	257.574	296.667	-0.204364	N	down	Klla0B	649247
KLLA0B07513g	YJL155C	XP_003957917.1	XP_003678287.1	XP_001646376.1	NP_984755.2	SAKL0C05742g	XP_716178.1;XP_716261.1	XP_664324.1	NP_593601.1	109.808	74.5915	94.2577	66.0632	118.721	77.6198	0.612909	N	up	No	No	140.517	122.7	131.295	106.729	159.219	139.358	0.18912	N	up	104.933	112.173	95.0096	106.729	119.207	127.921	-0.101689	N	down	126.063	122.894	120.983	106.729	143.228	139.873	0.0342107	N	up	Klla0B	652357
KLLA0B07535g	YJL154C	XP_003958222.1	XP_003675278.1	XP_001646375.1;XP_001646866.1	NP_984754.1	SAKL0C05764g	XP_712805.1;XP_712833.1	XP_662555.1	NP_588260.2	49.5354	24.1505	83.0567	41.8755	104.762	49.2066	1.09026	Y	up	Yes	No	34.5692	39.2622	65.8481	68.8172	79.8285	89.8509	-0.174135	N	down	36.814	35.8941	67.1179	68.8172	84.2064	82.4767	0.0297565	N	up	25.9305	39.325	50.3521	68.8172	59.6119	90.183	-0.597619	N	down	Klla0B	654189
KLLA0B07557g	YKR066C	XP_003958223.1	XP_003675277.1	XP_001646867.1	NA	SAKL0C05786g	XP_714170.1;XP_714211.1;XP_719937.1;XP_720067.1	XP_659234.1;XP_663044.1	NA	664.22	320.055	453.966	230.726	572.395	271.047	1.07842	Y	up	Yes	No	555.338	335.602	381.531	213.466	462.606	279.045	0.730565	N	up	346.389	306.786	229.763	213.466	288.218	256.137	0.172091	N	up	364.714	336.022	256.816	213.466	304.109	280.075	0.121084	N	up	Klla0B	657789
KLLA0B07579g	YJL187C	XP_003957895.1	XP_003678312.1	XP_001646399.1	NP_984712.1	SAKL0C04576g	XP_723363.1;XP_723552.1	XP_663426.1	NA	22.3102	31.5535	31.6972	45.9687	39.6931	54.0173	-0.445094	N	down	No	No	22.3683	24.553	34.8314	35.5762	42.1872	46.4817	-0.12196	N	down	26.7732	22.4457	39.8722	35.5762	50.0503	42.6662	0.236345	N	up	17.9876	24.5877	28.7101	35.5762	33.9917	46.6534	-0.446029	N	down	Klla0B	659591
KLLA0B07601g	YJL190C;YLR367W	XP_003957894.1;XP_003958471.1	XP_003673179.1;XP_003678315.1	XP_001643338.1;XP_001646401.1	NP_984710.1;NP_986126.1	SAKL0C04488g;SAKL0H04092g	XP_718767.1;XP_718852.1	XP_658511.1	NP_593234.1;NP_593367.1	5921.52	8915.61	1003.56	1606.4	1264.93	1887.57	-0.577465	N	down	No	No	6256.13	9084.06	1051.56	1399.19	1274.58	1826.63	-0.51926	N	down	7213.4	8304.82	1159.82	1399.19	1454.82	1676.72	-0.204822	N	down	6852.8	9098.77	1176.61	1399.19	1392.79	1833.39	-0.396634	N	down	Klla0B	664026
KLLA0B07623g	YJL191W;YCR031C	XP_003957893.1	XP_003675302.1;XP_003678316.1	XP_001646402.1;XP_001646843.1	NP_984709.1	SAKL0C04466g	NA	XP_663564.1	NP_594187.1;NP_595737.1	3326.02	3328.29	2319.33	2361.51	2939.46	2774.78	0.0831907	N	up	No	No	2933.06	3594.71	2364.46	2682	2865.44	3501.86	-0.289326	N	down	2878.44	3286.32	2209.16	2682	2771.44	3214.46	-0.213932	N	down	2822.71	3600.37	2303.45	2682	2727.25	3514.81	-0.365995	N	down	Klla0B	664788
KLLA0B07645g	YJL192C	XP_003957892.1	XP_003678319.1	XP_001646842.1	NP_986166.1	SAKL0C04444g	NA	NA	NA	182.291	143.043	61.2573	50.3385	77.252	59.1442	0.385383	N	up	No	No	161.027	166.276	68.1208	64.3802	82.5334	84.066	-0.0213871	N	down	142.234	152.01	57.3783	64.3802	72.0042	77.1664	-0.0997331	N	down	150.269	166.533	64.3327	64.3802	76.1668	84.3767	-0.146834	N	down	Klla0B	666889
KLLA0B07667g	YCR032W	XP_003958194.1	XP_003675303.1	XP_001646841.1	NP_986167.2	SAKL0C04422g	XP_718763.1;XP_718848.1	XP_657843.1	NP_595759.2	23.4096	18.5633	81.7252	66.7013	103.406	78.3965	0.399763	N	up	No	No	11.8113	11.4565	52.993	47.3491	64.2603	61.8499	0.0527043	N	up	13.1504	10.4733	56.6003	47.3491	71.0858	56.7732	0.326123	N	up	9.25569	11.4731	42.4243	47.3491	50.221	62.0784	-0.300356	N	down	Klla0B	667863
KLLA0B07689g	YJL193W	XP_003957891.1	XP_003678320.1	XP_001646840.1	NA	SAKL0C04400g	NA	XP_661891.1	NP_595643.2	372.428	290.466	189.198	156.621	241.382	184.052	0.391351	N	up	No	No	158.767	263.098	116.706	176.828	141.559	231.14	-0.70833	N	down	344.667	240.508	241.006	176.828	302.351	212.165	0.513189	N	up	153.054	263.431	114.484	176.828	135.545	231.994	-0.772376	N	down	Klla0B	673884
KLLA0B07711g	NA	NA	NA	XP_001642643.1	NP_982894.1;NP_984805.1	SAKL0G10120g	NA	NA	NA	19.9993	1.47515	21.1372	1.63881	26.4866	1.92571	3.77759	Y	up	Yes	No	23.9434	1.09967	24.8563	1.03693	30.1037	1.34886	4.3641	Y	up	1.40443	1.00557	1.41444	1.03693	1.77334	1.23826	0.4004	N	up	48.5578	1.10252	51.4322	1.03693	60.8933	1.35386	5.35692	Y	up	Klla0B	675600
KLLA0B07733g	YOL097C	XP_003956269.1	XP_003675850.1	XP_001643885.1	NP_984213.1	SAKL0C09680g	XP_716295.1;XP_716357.1	XP_661482.1	NP_592983.1	106.566	201.266	79.051	158.077	99.4549	185.744	-0.901322	N	down	No	No	150.971	190.12	135.175	156.913	163.869	204.879	-0.323399	N	down	176.558	173.81	152.53	156.913	191.366	188.064	0.0251205	N	up	174.039	190.421	160.279	156.913	189.76	205.636	-0.115944	N	down	Klla0B	677879
KLLA0B07755g	YDR487C	XP_003956270.1;XP_003958298.1	XP_003678258.1	XP_001643886.1	NP_984214.1	SAKL0C09658g	XP_716359.1	XP_663101.1	NP_596606.1	400.655	234.094	124.94	79.205	158.464	93.074	0.767937	N	up	No	No	467.736	370.247	172.445	125.026	209.023	163.373	0.357871	N	up	337.789	338.465	119.998	125.026	150.503	149.962	0.00809727	N	up	518.118	370.747	196.403	125.026	232.549	163.976	0.507346	N	up	Klla0B	679506
KLLA0B07777g	YLR372W	XP_003955184.1;XP_003958181.1	XP_003673183.1;XP_003678445.1	XP_001643331.1	NP_986133.1	SAKL0H03938g	XP_711561.1;XP_711629.1;XP_721027.1;XP_721147.1	XP_664039.1;XP_681386.1	NP_592859.3;NP_593930.1	497.736	614.129	267.212	352.955	338.549	414.762	-0.292817	N	down	No	No	462.3	577.331	323.059	371.483	391.54	484.979	-0.308845	N	down	559.295	527.805	375.004	371.483	470.62	445.177	0.0799425	N	up	561.301	578.257	399.763	371.483	473.27	486.772	-0.0408492	N	down	Klla0B	681163
KLLA0B07799g	YLR371W	XP_003958475.1	XP_003673182.1	XP_001643332.1	NP_986132.2	SAKL0H03960g	XP_721025.1;XP_721146.1	XP_662323.1	NP_588116.1;NP_594853.1	42.1378	35.863	95.4448	84.3784	120.862	99.1549	0.285913	N	up	No	No	31.8689	38.49	87.1324	97.387	105.66	127.208	-0.269956	N	down	38.5963	35.1871	101.206	97.387	127.022	116.767	0.123112	N	up	34.5293	38.5469	96.5565	97.387	114.311	127.678	-0.156715	N	down	Klla0B	682960
KLLA0B07821g	YLR370C	XP_003958474.1	XP_003678444.1	XP_001643333.1	NP_986131.1	SAKL0H03982g	XP_714052.1;XP_714327.1	XP_681334.1	NP_596291.1	471.617	319.208	109.312	77.011	138.207	90.4976	0.611072	N	up	No	No	374.656	389.969	107.479	102.902	130.23	134.417	-0.0412685	N	down	369.189	356.501	102.48	102.902	128.554	123.384	0.06152	N	up	353.389	390.527	103.406	102.902	122.451	134.914	-0.13676	N	down	Klla0B	687701
KLLA0B07843g	YLR369W	XP_003955185.1	XP_003678443.1	XP_001643334.1	NP_986130.1	SAKL0H04004g	XP_715228.1	NA	NA	49.9145	36.2987	65.9579	49.0316	83.0189	57.6174	0.526746	N	up	No	No	51.8415	44.6082	72.0309	57.669	87.3489	75.2983	0.208128	N	up	45.7313	40.7813	60.9909	57.669	76.517	69.1185	0.146873	N	up	48.1268	44.6791	68.9895	57.669	81.6881	75.5767	0.112674	N	up	Klla0B	688371
KLLA0B07865g	YLR368W	XP_003955186.1	XP_003673616.1	NA	NP_986129.1	SAKL0H04026g	NA	NA	NA	51.3596	45.8191	48.3509	44.5754	60.9104	52.3829	0.217638	N	up	No	No	44.0086	47.6117	53.9413	53.787	65.3828	70.2686	-0.0993537	N	down	48.5547	43.5253	56.8929	53.787	71.4331	64.5007	0.150268	N	up	46.013	47.6787	57.9511	53.787	68.6021	70.5282	-0.0337208	N	down	Klla0B	690559
KLLA0B07887g	YGR068C	XP_003958473.1	XP_003673181.1	XP_001643336.1	NP_986128.2	SAKL0H04048g	XP_721268.1;XP_721539.1	NA	NA	21.9146	18.2603	29.5095	25.9591	37.4111	30.5046	0.295316	N	up	No	No	19.4958	26.9566	29.9275	37.6651	36.2915	49.2091	-0.442131	N	down	33.761	24.6429	49.228	37.6651	61.8338	45.1698	0.456464	N	up	19.7022	26.9942	30.8727	37.6651	36.5491	49.3909	-0.424722	N	down	Klla0B	693510
KLLA0B07909g	YGR067C	XP_003958472.1;XP_003958472.1;XP_003958472.1;XP_003958472.1	XP_003673180.1;XP_003673180.1;XP_003673180.1;XP_003673180.1	XP_001643337.1	NP_986127.1	SAKL0H04070g	XP_716682.1;XP_716741.1	XP_657700.1;XP_658855.1;XP_659874.1;XP_661617.1;XP_662324.1;XP_664722.1;XP_682004.1	NP_592812.1;NP_593288.1;NP_594663.1;NP_596183.1	54.3048	10.183	92.0787	17.4201	113.695	20.4586	2.47376	Y	up	Yes	No	22.4894	15.134	45.8131	28.4278	55.4853	37.112	0.588116	N	up	12.8115	13.8358	25.4171	28.4278	31.9274	34.0663	-0.0984128	N	down	19.0693	15.1586	39.7085	28.4278	47.0231	37.2492	0.334469	N	up	Klla0B	697885
KLLA0B07931g	YLR367W;YJL190C	XP_003957894.1;XP_003958471.1	XP_003673179.1;XP_003678315.1	XP_001643338.1;XP_001646401.1	NP_984710.1;NP_986126.1	SAKL0C04488g;SAKL0H04092g	XP_718767.1;XP_718852.1	XP_658511.1	NP_593234.1;NP_593367.1	424.473	434.398	412.91	427.427	521.496	502.239	0.0543136	N	up	No	No	285.954	238.121	387.643	282.837	469.816	369.221	0.347286	N	up	220.274	217.696	271.23	282.837	340.271	338.92	0.00544122	N	up	244.641	238.511	327.238	282.837	387.422	370.586	0.0635878	N	up	Klla0B	701123
KLLA0B07953g	YGR065C	XP_003958139.1	XP_003673178.1	XP_001642441.1	NP_986125.2	SAKL0H04114g	NA	XP_659925.1	NA	68.2178	79.5959	67.2535	84.583	84.5738	99.3958	-0.233075	N	down	No	No	55.8805	65.0766	76.7878	82.8346	93.044	108.113	-0.216455	N	down	58.1868	59.4951	76.0738	82.8346	95.4809	99.2412	-0.0585535	N	down	69.3473	65.186	97.6277	82.8346	115.574	108.513	0.0874494	N	up	Klla0B	703782
KLLA0B07975g	YLR364W	XP_003955187.1	XP_003678442.1	XP_001642440.1	NP_986124.1	SAKL0H04136g	NA	XP_681899.1	NA	595.596	1039.66	64.5493	118.195	81.0719	138.898	-0.776962	N	down	No	No	743.139	1263.52	89.5104	141.285	108.503	184.629	-0.765015	N	down	922.959	1155.06	105.808	141.285	132.734	169.473	-0.34981	N	down	1263.67	1265.21	156.141	141.285	184.835	185.311	-0.000713701	N	down	Klla0B	705661
KLLA0B07997g	YGR063C	XP_003958137.1	XP_003673177.1	XP_001643339.1	NP_986123.1	SAKL0H04158g	XP_721856.1;XP_722016.1	NA	NP_596596.1	489.752	450.117	54.1576	53.0273	68.4179	62.3087	0.135217	N	up	No	No	564.467	660.688	58.9779	64.0909	71.4914	83.6765	-0.229666	N	down	540.736	604.013	55.3056	64.0909	69.4301	76.8092	-0.147321	N	down	551.175	661.757	58.9001	64.0909	69.7103	83.9859	-0.270815	N	down	Klla0B	706556
KLLA0B08019g	YGR062C	XP_003958136.1	XP_003673176.1	XP_001643340.1	NP_986122.1	SAKL0H04180g	XP_721855.1;XP_722015.1	XP_663328.1	NP_588329.1	37.594	46.4766	21.1889	27.0528	26.6169	31.7861	-0.256522	N	down	No	No	96.5933	66.2008	58.097	37.5219	70.4211	48.9818	0.519253	N	up	42.9356	60.523	25.1094	37.5219	31.5042	44.962	-0.515511	N	down	111.645	66.3124	69.6699	37.5219	82.4775	49.1629	0.74253	N	up	Klla0B	707312
KLLA0B08041g	YLR363W-A	XP_003958135.1	XP_003673175.1	XP_001642439.1	NP_986121.1	SAKL0H04202g	NA	NA	NA	173.856	243.452	14.5246	21.1863	18.2065	24.8931	-0.452466	N	down	No	No	409.925	245.086	31.8243	17.0239	38.5554	22.2039	0.7851	N	up	116.984	224.071	9.29027	17.0239	11.6386	20.3821	-0.814717	N	down	502.602	245.521	39.6233	17.0239	46.9163	22.2861	1.05209	Y	up	Klla0B	708380
KLLA0B08063g	YGR061C	XP_003958134.1	XP_003673174.1	XP_001642438.1	NP_986120.1	SAKL0H04224g	XP_711102.1;XP_711119.1	XP_681390.1	NP_593296.1	82.0868	109.31	217.53	312.042	275.115	366.677	-0.414391	N	down	No	No	116.355	147.359	348.568	406.149	422.558	530.201	-0.328069	N	down	135.749	134.719	388.35	406.149	487.403	486.689	0.00180194	N	up	136.58	147.599	416.988	406.149	493.656	532.162	-0.10872	N	down	Klla0B	709756
KLLA0B08085g	YGR060W	XP_003958133.1;XP_003958482.1	XP_003673173.1;XP_003673191.1	XP_001642831.1;XP_001643341.1	NP_986119.1	SAKL0H04246g	XP_713420.1;XP_713456.1;XP_722703.1;XP_722849.1	XP_664577.1;XP_682176.1	NP_592903.1	1203.26	2485.29	612.269	1384.68	778.671	1627.12	-1.06318	Y	down	No	Yes	802.76	1681.94	498.03	960.537	603.851	1255.7	-1.05616	Y	down	2988.1	1537.51	1779.22	960.537	2233.75	1152.62	0.954895	N	up	878.423	1684	556.956	960.537	659.601	1260.34	-0.933605	N	down	Klla0B	714158
KLLA0B08107g	YLR363C	XP_003955188.1	XP_003678441.1	XP_001643420.1	NA	SAKL0H04268g	XP_722431.1;XP_722569.1	NA	NA	99.4086	102.832	44.825	47.6708	56.2655	56.0059	0.00627471	N	up	No	No	122.191	111.247	56.6684	47.5479	68.6472	62.0555	0.147916	N	up	83.0889	101.706	36.5484	47.5479	45.8275	56.9631	-0.316024	N	down	145.068	111.438	68.2259	47.5479	80.7794	62.285	0.369574	N	up	Klla0B	716305
KLLA0B08129g	YGR059W	XP_003958132.1	XP_003673172.1	XP_001643419.1	NP_986118.2	SAKL0H04312g	XP_722568.1	NA	NP_593566.1;XP_001713168.1	44.1236	11.2475	45.4921	11.9543	57.0788	14.0469	2.0218	Y	up	Yes	No	37.4107	5.24871	43.7989	5.68153	53.0914	7.43097	2.8814	Y	up	5.09726	4.7979	5.7176	5.68153	7.19059	6.82084	0.0994114	N	up	161.735	5.25463	190.534	5.68153	225.565	7.4584	4.968	Y	up	Klla0B	718086
KLLA0B08151g	YGR058W	XP_003958131.1	XP_003673171.1	XP_001643418.1	NP_986117.1	SAKL0H04334g	XP_715963.1;XP_716021.1	XP_660590.1	NA	44.3416	56.8403	28.6097	38.2996	35.8841	45.0003	-0.327428	N	down	No	No	43.7314	49.1712	32.3432	33.5153	39.1995	43.7921	-0.150125	N	down	38.9843	44.9507	27.0073	33.5153	33.8967	40.1974	-0.238818	N	down	37.7604	49.2391	28.3222	33.5153	33.522	43.9539	-0.381484	N	down	Klla0B	720152
KLLA0B08173g	YMR230W;YOR293W	XP_003955002.1;XP_003955773.1	XP_003674530.1;XP_003675446.1	XP_001646689.1	NP_986116.1	SAKL0H04356g	NA	XP_661310.1	NP_594018.1;NP_595605.1	12325.5	14077.1	1768.48	2105.27	2227.82	2473.74	-0.151061	N	down	No	No	14040.8	18742.6	1776.57	2202.22	2153.83	2875.2	-0.416888	N	down	15430.9	17134.7	1882.34	2202.22	2362.22	2639.23	-0.160004	N	down	14226.9	18772.3	1844.38	2202.22	2183.7	2885.83	-0.402231	N	down	Klla0B	722254
KLLA0B08195g	YOR292C	XP_003955001.1	XP_003674529.1	NA	NP_986115.2	SAKL0H04378g	XP_711304.1	XP_658851.1	NP_593696.1;NP_594971.1	32.3247	31.2289	17.1889	17.0816	21.9263	20.0738	0.12895	N	up	No	No	28.2909	38.3072	18.1464	22.7406	22.0092	29.685	-0.453443	N	down	33.3941	35.0217	20.9686	22.7406	26.3124	27.2488	-0.0549201	N	down	27.5726	38.3719	18.4391	22.7406	21.8331	29.7947	-0.452484	N	down	Klla0B	723299
KLLA0B08217g	YOR291W	XP_003955000.1	XP_003674528.1	XP_001644278.1	NP_986114.2	SAKL0H04400g	XP_722474.1;XP_722615.1	XP_682133.1;XP_682133.1;XP_682133.1;XP_682133.1	NP_587882.1	24.1471	22.0478	64.4042	61.2501	80.8789	71.9744	0.168032	N	up	No	No	20.206	21.4532	64.2991	63.4289	77.9378	82.8181	-0.0887624	N	down	18.448	19.6127	56.3543	63.4289	70.7116	76.0211	-0.104626	N	down	19.3085	21.487	63.0286	63.4289	74.6103	83.1243	-0.156519	N	down	Klla0B	724364
KLLA0B08239g	YMR229C	XP_003955772.1	XP_003675447.1	XP_001645726.1	NP_986113.2	SAKL0H04422g	XP_722479.1;XP_722620.1	XP_659751.1	NP_587890.1	20.4765	37.5489	76.7578	143.134	95.8966	168.168	-0.810609	N	down	No	No	46.1828	41.2921	179.019	147.451	216.833	192.267	0.172439	N	up	17.702	37.7532	65.712	147.451	82.4086	176.493	-1.10086	Y	down	62.5179	41.3732	246.915	147.451	292.283	192.979	0.59544	N	up	Klla0B	729850
KLLA0B08261g	NA	NA	NA	XP_001645725.1	NP_986112.1	SAKL0H04444g	NA	NA	NA	44.6555	0.746234	27.5095	0.594142	34.5438	0.698419	5.62064	Y	up	Yes	No	74.1437	0.943762	51.1732	0.739114	62.0467	0.965378	6.00176	Y	up	0.605451	0.862803	0.452164	0.739114	NA	NA	NA	NA	NA	88.3403	0.945278	62.4973	0.739114	73.9846	0.968946	6.2577	Y	up	Klla0B	735279
KLLA0B08283g	YMR228W	XP_003955771.1	XP_003675448.1	XP_001645724.1	NP_986111.2	SAKL0H04466g	XP_722434.1;XP_722572.1	XP_660606.1	NP_593495.1	18.7816	23.4564	11.6059	14.4241	14.3798	16.946	-0.238935	N	down	No	No	62.4979	31.2371	41.9443	19.2503	50.7795	25.0995	1.01117	Y	up	22.021	28.5595	14.4797	19.2503	18.1502	23.0402	-0.355295	N	down	92.9378	31.2968	64.0496	19.2503	75.8269	25.1924	1.56517	Y	up	Klla0B	736483
KLLA0B08305g	YMR227C	XP_003955770.1	XP_003675449.1	XP_001645723.1	NP_986110.1	SAKL0H04488g	XP_722475.1;XP_722616.1	XP_680828.1	NP_593650.1	14.4816	22.0131	23.3175	36.2651	29.2697	42.616	-0.542716	N	down	No	No	20.7249	21.2266	33.2788	31.2669	40.3371	40.8258	-0.018407	N	down	21.2572	19.4055	32.6784	31.2669	40.9989	37.4751	0.12997	N	up	23.8869	21.2598	39.334	31.2669	46.5589	40.9767	0.183253	N	up	Klla0B	737967
KLLA0B08327g	YOR290C	XP_003955769.1	XP_003675450.1	XP_001645722.1	NP_986109.2	NA	XP_719938.1;XP_720068.1;XP_722570.1	XP_659882.1	NP_588472.2;NP_594861.1	14.8919	12.5661	46.9399	40.645	59.101	47.7612	0.307179	N	up	No	No	14.2499	14.1183	49.0946	44.8988	59.4839	58.5823	0.0194099	N	up	13.9135	12.9077	46.0657	44.8988	57.8221	53.7752	0.0976632	N	up	11.0402	14.1433	38.8368	44.8988	45.9759	58.799	-0.364054	N	down	Klla0B	742205
KLLA0B08371g	YMR226C	XP_003955768.1	XP_003675455.1	XP_001645721.1	NP_986108.1	SAKL0H04730g	XP_722705.1;XP_722851.1	XP_657783.1;XP_658222.1	NP_593098.1	262.075	184.672	131.798	97.1236	165.875	114.11	0.539572	N	up	No	No	205.272	200.931	102.247	93.2204	123.93	121.838	0.0289043	N	up	222.649	183.681	106.161	93.2204	133.293	111.836	0.256442	N	up	169.288	201.194	86.4071	93.2204	102.298	122.288	-0.252003	N	down	Klla0B	747517
KLLA0B08415g	YPR063C	XP_003958641.1	XP_003674049.1	XP_001644867.1	NP_983767.2	SAKL0B07612g	NA	NA	NP_592875.1	563.559	496.887	79.8045	74.8614	101.14	87.9533	0.201831	N	up	No	No	617.584	801.369	96.4477	115.513	116.854	150.807	-0.365465	N	down	801.421	732.623	120.281	115.513	151.014	138.431	0.124404	N	up	582.619	802.651	94.0355	115.513	111.34	151.365	-0.44351	N	down	Klla0B	749520
KLLA0B08437g	YPR062W	XP_003958642.1	XP_003674048.1	XP_001644868.1	NP_983768.2	SAKL0B07590g	NA	NA	NP_588524.1	345.337	412.731	84.9127	107.479	106.876	126.284	-0.240856	N	down	No	No	543.068	558.253	123.402	117.456	149.554	153.315	-0.0367459	N	down	360.378	510.373	80.624	117.456	101.095	140.733	-0.47762	N	down	574.345	559.19	132.734	117.456	157.165	153.882	0.0289117	N	up	Klla0B	750194
KLLA0B08459g	YPR061C	XP_003958643.1	XP_003674047.1	XP_001642857.1	NP_983769.1	SAKL0B07568g	XP_713035.1;XP_713067.1	XP_681448.1	NP_593700.1	41.3534	36.9285	21.166	19.4231	26.5479	22.8253	0.217039	N	up	No	No	38.4388	34.1289	21.4006	17.8259	25.932	23.2863	0.170519	N	up	28.1589	31.1999	15.5132	17.8259	19.471	21.3749	-0.1276	N	down	32.5133	34.178	18.9926	17.8259	22.4794	23.3723	-0.0474509	N	down	Klla0B	751178
KLLA0B08481g	YPR060C	XP_003958644.1	XP_003674046.1	XP_001642856.1	NP_983770.1	SAKL0B07546g	XP_713036.1;XP_713068.1	XP_664470.1	NP_594216.1	110.252	154.584	56.8549	82.0127	71.4042	96.3573	-0.432798	N	down	No	No	180.665	181.809	87.4433	81.5975	105.96	106.514	-0.00720538	N	down	145.064	166.214	68.2056	81.5975	85.5768	97.7726	-0.193777	N	down	207.407	182.108	103.293	81.5975	122.278	106.908	0.191302	N	up	Klla0B	752482
KLLA0B08503g	YBR104W;YPR058W	XP_003957058.1;XP_003958645.1	XP_003674045.1;XP_003678128.1	XP_001642855.1;XP_001644869.1	NA	SAKL0A00132g;SAKL0A10670g;SAKL0B07524g	XP_713891.1;XP_714093.1	XP_661854.1	NP_593701.2	49.5981	30.6827	28.166	18.1772	35.3371	21.358	0.725436	N	up	No	No	128.19	94.7558	78.0857	52.8915	94.6459	68.9701	0.447401	N	up	60.8302	86.6329	35.4294	52.8915	44.4062	63.3114	-0.516151	N	down	151.638	94.9338	93.6635	52.8915	110.873	69.2254	0.669584	N	up	Klla0B	753498
KLLA0B08525g	YPR057W	XP_003958646.1	XP_003674044.1	XP_001642854.1	NP_983771.1	SAKL0B07502g	NA	NA	NP_001018218.1;NP_594775.1	13.5442	28.1399	7.20087	15.2867	9.01521	17.9607	-0.996688	N	down	No	No	31.4967	24.8673	20.2327	14.8573	24.5292	19.393	0.324384	N	up	20.5464	22.7343	12.8867	14.8573	16.1763	17.8015	-0.145882	N	down	35.7608	24.9081	23.4967	14.8573	27.8183	19.4647	0.506939	N	up	Klla0B	754935
KLLA0B08547g	NA	NA	XP_003678129.1	XP_001644870.1	NP_983772.1	Sklu_YGOB_Anc_3.346	XP_711247.1;XP_711271.1	NA	NA	172.934	189.486	18.7213	21.9485	23.5061	25.7881	-0.134415	N	down	No	No	223.762	189.637	31.4191	24.1578	38.0819	31.5493	0.274421	N	up	155.353	173.365	20.9962	24.1578	26.3444	28.9598	-0.133359	N	down	252.267	189.922	36.1032	24.1578	42.7438	31.6659	0.437489	N	up	Klla0B	756147
KLLA0B08569g	YPR056W	XP_003958647.1	XP_003674043.1	XP_001644871.1	NP_983773.1	SAKL0B07480g	XP_711246.1;XP_711270.1	XP_657742.1	NP_595532.1	67.9917	83.9808	39.419	50.9431	49.686	59.8498	-0.26859	N	down	No	No	92.9076	97.9846	61.154	59.6811	74.1307	77.9531	-0.0710468	N	down	82.3186	89.5763	51.9419	59.6811	65.1425	71.5548	-0.131961	N	down	91.358	98.1294	61.4202	59.6811	72.7105	78.2412	-0.101898	N	down	Klla0B	756558
KLLA0B08591g	YMR259C	XP_003955809.1	XP_003675915.1	XP_001645618.1	NP_985130.2	SAKL0D02222g	XP_717088.1;XP_717089.1;XP_717167.1;XP_717168.1	XP_663953.1	NP_588532.1	15.0485	19.4053	40.006	52.6617	50.2968	61.8775	-0.299037	N	down	No	No	16.4981	14.7924	51.7748	42.6528	62.7415	55.6718	0.170726	N	up	13.9382	13.5237	41.9573	42.6528	52.6189	51.1031	0.0397032	N	up	17.9935	14.8173	57.4669	42.6528	68.0161	55.8776	0.277373	N	up	Klla0B	758017
KLLA0B08635g	YMR258C	XP_003955810.1	NA	XP_001643791.1	NP_986448.2	SAKL0D02310g	XP_715198.1	NA	NA	304.578	294.292	287.103	285.016	363.404	334.902	0.117914	N	up	No	No	136.312	191.266	154.596	199.246	187.467	260.378	-0.474101	N	down	211.462	174.847	229.254	199.246	287.864	239.004	0.269555	N	up	145.239	191.522	168.773	199.246	199.84	261.34	-0.384749	N	down	Klla0B	762767
KLLA0B08657g	YMR257C	XP_003955811.1	XP_003675419.1	XP_001643792.1	NP_986449.1	SAKL0D02332g	NA	NA	NA	19.7461	30.8568	28.1987	44.2055	35.3589	51.9416	-0.5557	N	down	No	No	29.2851	31.9975	51.1617	51.6734	62.0267	67.4723	-0.125634	N	down	26.5684	29.2523	44.2694	51.6734	55.5052	61.9347	-0.156377	N	down	38.366	32.0475	68.0661	51.6734	80.5668	67.7217	0.250201	N	up	Klla0B	764962
KLLA0B08679g	YOL054W	XP_003956949.1	XP_003674559.1	XP_001643793.1	NP_986450.2	SAKL0D02354g	XP_719928.1;XP_720058.1	XP_659772.1;XP_663565.1	NP_587745.1	19.3441	25.3882	15.2582	20.4846	19.1506	24.0687	-0.330888	N	down	No	No	28.3153	34.0738	20.0061	22.4423	24.2644	29.2961	-0.292254	N	down	35.9616	31.1512	24.755	22.4423	31.0693	26.8919	0.203512	N	up	28.0824	34.1302	20.2937	22.4423	24.0285	29.4044	-0.295214	N	down	Klla0B	767808
KLLA0B08712g	YMR256C	XP_003955812.1	XP_003675420.1	XP_001643794.1	NP_986451.2	Sklu_YGOB_Anc_8.807	XP_719926.1;XP_720056.1	NA	NA	15259.8	10370.3	491.286	359.721	617.803	422.672	0.54758	N	up	No	No	16939	16411.7	526.34	474.114	638.001	619.148	0.0432998	N	up	13460.7	15003.5	408.691	474.114	512.644	568.332	-0.148543	N	down	15688	16436.5	505.839	474.114	598.908	621.437	-0.0530149	N	down	Klla0B	769252
KLLA0B08734g	YOL053W	NA	XP_003674558.1	XP_001643795.1	NP_986452.1	SAKL0D02398g	XP_713506.1;XP_713547.1	NA	NP_596659.1	55.5282	53.1442	29.125	28.5686	36.8018	33.5678	0.132844	N	up	No	No	76.36	61.5054	51.2403	38.1364	62.1451	49.7873	0.308882	N	up	52.9009	56.2293	33.6141	38.1364	42.1479	45.7013	-0.11669	N	down	77.6072	61.6046	53.4959	38.1364	63.3341	49.9713	0.339344	N	up	Klla0B	770125
KLLA0B08756g	YMR255W	XP_003955813.1	NA	XP_001646105.1	NP_986453.2	SAKL0D02420g	NA	NA	NA	56.5203	76.2911	23.2817	33.4759	29.1777	39.3318	-0.431965	N	down	No	No	98.7961	101.916	36.8325	35.3531	44.6425	46.1493	-0.0517412	N	down	109.999	93.1737	38.8937	35.3531	48.7934	42.362	0.201145	N	up	100.326	102.083	38.1924	35.3531	45.2167	46.32	-0.0391187	N	down	Klla0B	771322
KLLA0B08778g	YMR252C	XP_003955815.1	XP_003675423.1	NA	NP_986454.1	SAKL0D02464g	NA	NA	NA	62.1954	73.2377	8.48541	10.595	10.6338	12.4453	-0.22888	N	down	No	No	78.5401	73.6021	11.5151	10.0689	13.9488	13.1414	0.0934405	N	up	60.0728	67.2916	8.77826	10.0689	11.0115	12.063	-0.139678	N	down	102.509	73.7355	15.2104	10.0689	18.0098	13.19	0.438584	N	up	Klla0B	772247
KLLA0B08800g	YDR242W	NA	XP_003674716.1	NA	NA	SAKL0D02486g	XP_716924.1;XP_716991.1;XP_720880.1;XP_721393.1	XP_658387.1;XP_660266.1;XP_660483.1;XP_664123.1;XP_664641.1;XP_682046.1	NP_588099.1	18.2846	14.4659	20.1725	17.2214	25.4246	20.2339	0.329446	N	up	No	No	19.4572	22.9947	24.8825	26.6668	30.1495	34.8275	-0.196969	N	down	20.8523	21.0217	24.6629	26.6668	30.9452	31.9689	-0.0432913	N	down	23.7375	23.0297	30.2595	26.6668	35.8267	34.9562	0.0414853	N	up	Klla0B	772732
KLLA0B08822g	YBR126C	XP_003957036.1	XP_003674067.1;XP_003678106.1	XP_001645709.1	NP_983718.1	SAKL0B08470g	XP_711706.1;XP_712180.1	XP_663127.1	NP_594205.1	1136.1	967.976	928.315	847.301	1179.28	995.59	0.244319	N	up	No	No	312.281	564.446	316.098	526.091	383.41	687.948	-0.84357	N	down	926.931	515.969	898.179	526.091	1127.69	631.467	0.837252	N	up	263.433	565.094	272.382	526.091	322.575	690.488	-1.09697	Y	down	Klla0B	775550
KLLA0B08844g	YBR125C	XP_003957037.1	XP_003678107.1	XP_001645708.1	NP_983719.2	SAKL0B08448g	XP_711704.1;XP_712178.1	NA	NA	63.6601	100.029	41.3838	66.9418	52.1049	78.6611	-0.594233	N	down	No	No	62.7371	74.7997	51.1226	56.0558	61.977	73.2264	-0.239692	N	down	74.2689	68.3807	58.6009	56.0558	73.5298	67.2159	0.133272	N	up	59.9063	74.9093	50.111	56.0558	59.314	73.497	-0.304747	N	down	Klla0B	777472
KLLA0B08866g	YBR123C	XP_003957038.1	XP_003678108.1	XP_001645707.1	NP_983720.2	SAKL0B08426g	XP_722673.1;XP_722819.1	XP_681266.1	NP_593297.1	21.7531	30.4071	24.531	35.2262	30.9771	41.393	-0.41786	N	down	No	No	28.1066	30.7964	36.455	36.661	44.1986	47.8545	-0.124927	N	down	30.5656	28.155	37.6731	36.661	47.2965	43.9273	0.10189	N	up	24.9482	30.8477	32.9301	36.661	38.9724	48.0315	-0.308269	N	down	Klla0B	779130
KLLA0B08888g	YBR122C	XP_003957039.1	XP_003678109.1	XP_001646154.1	NP_983721.1	SAKL0B08404g	XP_714621.1;XP_714754.1	XP_661199.1	XP_004001715.1	144.233	170.646	38.8854	48.3328	48.9891	56.7932	-0.213316	N	down	No	No	444.732	250.082	125.069	64.6799	151.548	84.3735	0.84031	N	up	169.823	228.641	46.1426	64.6799	57.8704	77.4504	-0.424842	N	down	560.967	250.541	160.63	64.6799	190.146	84.6856	1.15963	Y	up	Klla0B	781251
KLLA0B08910g	YPR082C	XP_003958623.1	XP_003674066.1	XP_001646155.1	NP_983722.1	SAKL0B08382g	XP_715681.1;XP_715737.1	XP_660452.1	NP_587992.1	21.5064	22.6646	4.30269	4.74254	5.37863	5.57225	-0.0551006	N	down	No	No	24.0399	27.3197	5.00471	5.07944	6.0623	6.6283	-0.122387	N	down	27.7927	24.9766	5.33098	5.07944	6.69042	6.08438	0.119642	N	up	26.542	27.3658	5.40561	5.07944	6.40035	6.65281	-0.0729789	N	down	Klla0B	782025
KLLA0B08932g	YBR121C	XP_003957040.1	XP_003678110.1	XP_001645114.1;XP_001646156.1	NP_983723.1	SAKL0B08360g	XP_715872.1;XP_715922.1	XP_682104.1	NP_593935.1	186.259	220.284	292.84	371.377	370.681	436.379	-0.235321	N	down	No	No	208.464	315.464	297.233	414.475	360.304	541.126	-0.587219	N	down	309.86	288.402	423.25	414.475	531.101	496.716	0.0964237	N	up	222.221	315.971	323.645	414.475	383.184	543.126	-0.503373	N	down	Klla0B	783004
KLLA0B08954g	YBR120C	XP_003957041.1	XP_003678111.1	XP_001645115.1	NP_983724.1	SAKL0B08338g	XP_715983.1;XP_716041.1	NA	NA	138.933	151.283	39.4475	44.487	49.1187	52.2764	-0.0907662	N	down	No	No	406.933	248.313	102.63	56.7213	124.382	74.025	0.744749	N	up	175.297	227.015	42.6155	56.7213	53.4965	67.9503	-0.349706	N	down	492.854	248.726	126.816	56.7213	150.137	74.2987	1.00959	Y	up	Klla0B	785408
KLLA0B08976g	YBR119W	XP_003957042.1	XP_003678112.1	XP_001646157.1	NP_983725.2	SAKL0B08316g	XP_716616.1	XP_657713.1	NP_596424.1	25.8368	26.3343	15.569	16.5442	19.441	19.4405	-0.00148986	N	down	No	No	52.4851	36.7513	30.0374	19.3866	36.3991	25.2857	0.512086	N	up	27.2354	33.6006	14.6137	19.3866	18.3294	23.211	-0.353115	N	down	45.0375	36.8192	26.4057	19.3866	31.2588	25.3793	0.280011	N	up	Klla0B	786122
KLLA0B08998g	YPR080W;YBR118W	XP_003957043.1;XP_003958624.1	XP_003674065.1;XP_003678113.1	XP_001645116.1;XP_001646158.1	NP_983726.1	SAKL0B08294g	XP_710144.1;XP_710148.1;XP_711870.1;XP_711899.1;XP_717581.1;XP_717655.1	XP_661822.1	NP_587757.1;NP_594440.1;NP_595255.1	9194.55	8592.93	10260.6	10500.7	13029.3	12337.7	0.0786911	N	up	No	No	8783.04	9241.94	8214.63	7988.72	9959.68	10428.7	-0.066437	N	down	8860.89	8449.18	7962.79	7988.72	9994.43	9572.88	0.0621548	N	up	8340.1	9257.01	7959.06	7988.72	9423.43	10467.3	-0.151582	N	down	Klla0B	787497
KLLA0B09020g	YPR079W	XP_003958625.1	XP_003678114.1	XP_001646160.1	NP_983727.1	SAKL0B08272g	XP_713568.1;XP_713603.1	XP_661699.1	NP_595322.1	11.5119	17.6579	6.55854	10.3319	8.16101	12.1405	-0.576654	N	down	No	No	18.6041	28.1059	12.1358	16.9474	14.7052	22.1023	-0.598979	N	down	18.8778	25.6968	11.5055	16.9474	14.4442	20.2889	-0.507181	N	down	12.6222	28.1595	8.38246	16.9474	9.92195	22.1841	-1.1832	Y	down	Klla0B	790295
KLLA0B09042g	NA	NA	NA	NA	NA	NA	NA	NA	NA	51.9926	0.559669	12.862	0.17195	16.1789	0.20212	6.29128	Y	up	Yes	No	62.4936	1.39315	15.5124	0.284374	18.7856	0.369903	5.52975	Y	up	1.66186	1.27396	0.38282	0.284374	NA	NA	NA	NA	NA	61.5124	1.39684	16.2762	0.284374	19.2715	0.371275	5.54618	Y	up	Klla0B	791864
KLLA0B09064g	YMR303C;YOL086C;YMR083W;YBR145W	XP_003954651.1;XP_003958311.1;XP_003959946.1;XP_003959947.1	XP_003673717.1;XP_003678182.1;XP_003678245.1	XP_001642939.1;XP_001647135.1	NP_982625.2;NP_982914.1;NP_984892.1	SAKL0B08184g;SAKL0C10164g;SAKL0E02838g;SAKL0F06270g	XP_717575.1;XP_717649.1;XP_721905.1;XP_722066.1	XP_659890.1;XP_682248.1	NP_588244.1	2609.17	341.277	2293.14	332.369	2902.84	390.51	2.89402	Y	up	Yes	No	701.184	857.676	546.756	613.988	661.893	800.703	-0.274367	N	down	241.125	784.161	179.374	613.988	224.869	735.007	-1.70886	Y	down	40.8529	859.327	31.8702	613.988	37.7211	803.665	-4.41445	Y	down	Klla0B	792849
KLLA0B09108g	NA	NA	NA	XP_001646163.1	NA	SAKL0B08140g	XP_717998.1;XP_718065.1	XP_661693.1	NA	33.3874	31.4986	14.7487	14.706	18.5977	17.2815	0.106246	N	up	No	No	40.4447	48.799	20.0524	22.3011	24.2984	29.1536	-0.242747	N	down	50.659	44.6093	24.0825	22.3011	30.2069	26.7602	0.189827	N	up	32.3663	48.8616	16.2957	22.3011	19.2903	29.2612	-0.583014	N	down	Klla0B	795534
KLLA0B09130g	YPR075C	XP_003958628.1;XP_003958628.1	XP_003674063.1	XP_001642205.1;XP_001642205.1	NA	SAKL0B08118g;SAKL0B08118g	XP_717572.1;XP_717572.1;XP_717646.1;XP_717646.1	NA	NA	18.1921	34.1148	15.8671	31.2429	19.9745	36.7077	-0.878176	N	down	No	No	43.979	37.7771	37.2326	29.3939	45.0884	38.3553	0.237758	N	up	31.7742	34.5377	26.1628	29.3939	32.8574	35.2079	-0.108832	N	down	44.2525	37.8436	37.8842	29.3939	44.8518	38.4971	0.208886	N	up	Klla0B	797768
KLLA0B09152g	YPR074C;YBR117C	XP_003957045.1;XP_003958629.1	XP_003674062.1;XP_003678116.1	XP_001643470.1;XP_001646164.1	NP_983730.1	SAKL0B08096g	XP_717574.1;XP_717648.1	XP_658292.1	NP_596066.1	1061.38	970.031	1645.52	1660.52	2084.88	1951.18	0.0956283	N	up	No	No	1292.32	1371.15	1896.25	1857.22	2297.91	2424.36	-0.0772817	N	down	1267.98	1253.54	1778.67	1857.22	2232.54	2225.4	0.00454222	N	up	1326.9	1373.41	1986.88	1857.22	2352.32	2433.32	-0.0489348	N	down	Klla0B	800238
KLLA0B09174g	YPR073C	XP_003958630.1	XP_003674061.1	XP_001646165.1	NP_983731.1	SAKL0B08074g	XP_717567.1;XP_717641.1	XP_662172.1	XP_001713094.1	96.048	156.252	20.9654	36.2406	26.2745	42.585	-0.697577	N	down	No	No	167.475	186.395	40.2246	41.4532	48.7406	54.1149	-0.148511	N	down	169.1	170.403	38.9602	41.4532	48.8758	49.6738	-0.0251187	N	down	167.496	186.684	40.2759	41.4532	47.6805	54.315	-0.191357	N	down	Klla0B	802641
KLLA0B09196g	YPR072W	XP_003958631.1	XP_003674060.1	XP_001643469.1;XP_001643469.1;XP_001643469.1;XP_001643469.1	NP_983732.1;NP_983732.1;NP_983732.1;NP_983732.1	SAKL0B08052g	XP_717570.1;XP_717644.1	XP_662189.1	NA	30.4932	43.2247	39.9243	58.5368	50.1931	68.7789	-0.454866	N	down	No	No	50.506	52.4106	63.7377	60.9729	77.2384	79.6178	-0.0405988	N	down	48.6122	47.9143	58.6968	60.9729	73.6345	73.0833	0.011712	N	up	55.7194	52.4934	71.7593	60.9729	84.9531	79.9121	0.0889461	N	up	Klla0B	803259
KLLA0B09218g	YBR115C	XP_003957046.1	XP_003678117.1	XP_001643468.1	NP_983749.2	SAKL0B08030g	XP_721197.1;XP_721469.1	XP_663214.1	NP_594314.1	84.7533	89.1174	236.24	260.567	298.923	306.19	-0.0345723	N	down	No	No	99.9766	85.0854	308.116	242.243	373.553	316.539	0.239655	N	up	129.384	77.7819	381.9	242.243	479.675	290.555	0.724016	N	up	96.0142	85.2018	303.148	242.243	358.861	317.708	0.177389	N	up	Klla0B	805915
KLLA0B09240g	YBR114W	XP_003957047.1	XP_003678118.1	XP_001643467.1	NP_983750.2	SAKL0B08008g	XP_721196.1;XP_721468.1	XP_661876.1	NP_587701.1	14.6861	23.3961	23.5314	38.364	29.4757	45.0843	-0.613934	N	down	No	No	17.9524	24.2663	31.4359	39.0642	38.1487	51.0113	-0.436181	N	down	27.6223	22.1843	45.7076	39.0642	57.3299	46.8246	0.293823	N	up	24.3817	24.3039	43.4279	39.0642	51.4077	51.1999	0.00682576	N	up	Klla0B	810178
KLLA0B09262g	YBR112C	XP_003958632.1	XP_003674059.1	XP_001642195.1;XP_001643466.1	NP_983751.2	SAKL0B07986g	XP_719777.1;XP_719894.1	XP_661151.1;XP_661151.1;XP_661151.1;XP_661151.1;XP_661151.1;XP_661151.1;XP_661151.1;XP_661151.1;XP_661151.1;XP_661151.1;XP_661151.1;XP_661151.1;XP_661943.1;XP_681726.1;XP_681726.1;XP_681726.1;XP_681726.1;XP_681726.1;XP_681726.1	NP_596609.1	34.1513	56.1204	69.1963	118.916	87.2319	139.719	-0.679606	N	down	No	No	44.0663	46.55	90.2817	88.2271	109.4	115.189	-0.0728324	N	down	44.6549	42.5567	87.8025	88.2271	110.224	105.736	0.0588584	N	up	44.7021	46.6244	93.4787	88.2271	110.684	115.615	-0.0631685	N	down	Klla0B	814303
KLLA0B09284g	YBR111W-A	XP_003957048.1	XP_003678119.1	XP_001642863.1	NP_983752.1	SAKL0B07964g	XP_719774.1;XP_719891.1	NA	NA	136.721	181.298	13.6539	18.9529	17.2121	22.2722	-0.371751	N	down	No	No	224.041	210.926	23.6387	20.4522	28.6421	26.7122	0.113521	N	up	252.848	192.822	25.5321	20.4522	32.0502	24.5197	0.389655	N	up	215.045	211.222	23.6126	20.4522	27.9548	26.8109	0.0672547	N	up	Klla0B	817377
KLLA0B09306g	YBR111C	XP_003957049.1	XP_003678120.1	XP_001642862.1	NP_983753.1	SAKL0B07942g	XP_719775.1;XP_719892.1	XP_680980.1	NP_595387.1	154.837	172.353	56.96	65.9206	71.9098	77.4596	-0.107118	N	down	No	No	163.448	159.715	61.744	55.113	74.8708	72.0358	0.0585846	N	up	189.823	146.001	68.6634	55.113	86.1927	66.1222	0.388461	N	up	148.113	159.914	57.43	55.113	67.9703	72.3019	-0.0813691	N	down	Klla0B	818061
KLLA0B09350g	YPR070W	XP_003958633.1	XP_003674058.1	XP_001642861.1	NP_983754.1	SAKL0B07898g	XP_720950.1;XP_721072.1	NA	NA	60.5768	42.8935	42.5083	31.2847	53.6317	36.7555	0.545009	N	up	No	No	83.5642	55.4987	71.0485	43.8492	86.1201	57.2596	0.588841	N	up	43.237	50.7369	36.0924	43.8492	45.2403	52.56	-0.213375	N	down	78.0355	55.5837	67.0912	43.8492	79.4195	57.4712	0.467577	N	up	Klla0B	819170
KLLA0B09372g	YPR069C	XP_003957051.1	XP_003678121.1	XP_001644860.1	NP_983755.2	SAKL0B07876g	XP_714778.1;XP_714840.1	XP_658291.1	NP_596015.1	938.33	899.587	530.443	549.737	672.743	645.955	0.0586771	N	up	No	No	893.503	1187.43	513.334	626.715	622.112	818.046	-0.395111	N	down	998.183	1085.58	547.771	626.715	687.416	750.913	-0.127722	N	down	931.702	1189.4	543.39	626.715	643.428	821.071	-0.351976	N	down	Klla0B	821388
KLLA0B09394g	YPR068C	XP_003958634.1	XP_003674057.1	XP_001642860.1	NP_983756.2	SAKL0B07854g	XP_711859.1;XP_723599.1	NA	NA	41.0492	22.781	27.2183	15.84	34.3928	18.6126	0.886197	N	up	No	No	32.6427	25.6984	27.288	19.2338	33.0865	25.1168	0.391173	N	up	24.702	23.4934	19.1885	19.2338	24.0473	23.0554	0.065837	N	up	29.3418	25.7374	24.947	19.2338	29.5339	25.2096	0.231383	N	up	Klla0B	822629
KLLA0B09405g	YBR110W	XP_003957052.1	XP_003678122.1	XP_001644861.1	NP_983757.2	SAKL0B07832g	XP_711858.1;XP_723598.1	XP_662950.1	NP_593186.1	235.326	154.025	162.085	111.152	205.333	130.613	0.65282	N	up	No	No	131.07	175.531	116.136	143.236	140.788	187.154	-0.409515	N	down	176.03	160.464	149.3	143.236	187.205	171.791	0.126112	N	up	127.758	175.772	115.653	143.236	136.955	187.846	-0.452836	N	down	Klla0B	823945
KLLA0B09427g	YBR109C	XP_003957053.1	XP_003674056.1;XP_003678123.1	XP_001642859.1	NP_983758.1	SAKL0B07810g	XP_711861.1;XP_723601.1	XP_659651.1	NP_593340.1	1088.05	764.628	207.7	156.362	262.962	183.733	0.517357	N	up	No	No	740.583	794.418	171.086	165.8	207.388	216.48	-0.0625815	N	down	752.531	726.257	163.396	165.8	205.09	198.713	0.0452593	N	up	729.509	795.637	168.016	165.8	198.91	217.281	-0.127558	N	down	Klla0B	825951
KLLA0B09460g	YBR108W	XP_003957054.1	XP_003678124.1	XP_001642858.1	NP_983760.2;NP_983760.2	SAKL0B07788g	XP_712637.1;XP_712787.1	NA	NA	10.8798	9.43859	20.4512	19.2108	25.9528	22.5695	0.202412	N	up	No	No	11.3962	16.2188	21.4399	28.2143	26.0007	36.8477	-0.513808	N	down	14.6594	14.8272	26.577	28.2143	33.3895	33.8233	-0.0193394	N	down	12.9792	16.2435	25.2065	28.2143	29.8321	36.9839	-0.308228	N	down	Klla0B	826867
KLLA0B09482g	NA	NA	NA	NA	NA	NA	NA	NA	NA	95.2176	45.5939	23.0122	11.4582	29.0508	13.4647	1.10958	Y	up	No	No	71.6392	56.2344	23.6926	16.7739	28.7175	21.9077	0.394803	N	up	51.5342	51.4076	16.0832	16.7739	20.1667	20.1095	0.010955	N	up	60.0485	56.312	20.6688	16.7739	24.4575	21.9886	0.155506	N	up	Klla0B	829842
KLLA0B09504g	YPR067W	XP_003958637.1	XP_003674054.1;XP_003678125.1	XP_001644863.1	NP_983762.1	SAKL0B07744g	XP_719789.1;XP_719906.1	XP_663557.1	NP_596675.1	54.9166	39.9041	16.5872	13.0009	21.0565	15.2729	0.464252	N	up	No	No	68.06	73.5923	20.6168	20.2206	24.9845	26.3858	-0.0858639	N	down	61.5333	67.2819	17.5793	20.2206	22.0216	24.2206	-0.139634	N	down	58.9983	73.7229	17.9101	20.2206	21.202	26.4834	-0.334784	N	down	Klla0B	830548
KLLA0B09526g	YPR066W	XP_003958638.1	XP_003674053.1	XP_001644864.1	NP_983763.1	SAKL0B07722g	XP_711261.1;XP_711284.1	XP_660020.1	NP_592940.1	17.5962	17.6452	10.1293	10.8328	12.7878	12.7256	0.00720087	N	up	No	No	22.3008	24.7839	12.9189	13.5018	15.6608	17.6349	-0.169658	N	down	22.3194	22.6573	12.4925	13.5018	15.6766	16.1875	-0.0403891	N	down	18.0414	24.8213	10.7599	13.5018	12.7338	17.7001	-0.471166	N	down	Klla0B	831336
KLLA0B09548g	YBR106W	XP_003957056.1;XP_003958639.1	XP_003674052.1;XP_003678126.1	XP_001644865.1	NP_983764.2	SAKL0B07700g	XP_716461.1	XP_681309.1	NP_594054.1;NP_595944.2	710.319	624.241	205.532	192.678	259.805	226.402	0.198629	N	up	No	No	1074.84	1209.81	351.157	363.356	425.517	474.49	-0.156504	N	down	1045.7	1106.01	326.921	363.356	410.096	435.546	-0.086632	N	down	1094.22	1211.68	368.222	363.356	435.92	476.244	-0.12743	N	down	Klla0B	832583
KLLA0B09592g	YBR105C	XP_003957057.1	XP_003678127.1	XP_001644866.1	NP_983766.2	SAKL0B07634g	XP_716106.1	XP_658783.1	NP_593556.2	314.771	363.983	193.316	238.137	245.605	279.81	-0.187958	N	down	No	No	223.744	330.622	144.235	196.91	175.01	257.128	-0.558791	N	down	363.131	302.256	226.456	196.91	284.061	236.025	0.267591	N	up	219.399	331.135	144.805	196.91	171.431	258.079	-0.589854	N	down	Klla0B	834414
KLLA0B09636g	YPL059W	XP_003954693.1	XP_003674687.1;XP_003675580.1	XP_001644353.1	NP_984149.1	SAKL0H10626g	XP_711724.1;XP_711746.1	XP_661908.1	NP_593888.1	525.655	341.254	108.995	76.5571	137.937	89.9679	0.61678	N	up	No	No	738.726	654.042	154.437	128.604	187.189	167.925	0.156619	N	up	544.826	597.925	110.424	128.604	138.492	154.143	-0.153857	N	down	729.29	655.043	158.057	128.604	187.129	168.546	0.151144	N	up	Klla0B	836265
KLLA0B09658g	YPR127W	XP_003955106.1	XP_003674106.1;XP_003677543.1	XP_001646187.1	NP_982574.1	SAKL0F03696g	XP_716440.1	XP_682448.1	NP_588168.1;NP_594192.1;NP_594584.1	197.267	23.7594	135.709	17.5331	172.286	20.6001	3.06392	Y	up	Yes	No	182.929	43.6658	122.757	26.559	148.774	34.6846	2.104	Y	up	26.3813	39.9191	16.6731	26.559	20.8947	31.8378	-0.601368	N	down	202.001	43.7319	137.403	26.559	162.663	34.8127	2.22717	Y	up	Klla0B	837873
KLLA0B09680g	YBR163W	XP_003957594.1	XP_003674688.1	XP_001644352.1	NP_984150.1	SAKL0C05632g;SAKL0H10648g	XP_715117.1;XP_715168.1	XP_658334.1	NP_596136.1	26.5575	30.9459	27.2337	32.7065	34.7898	38.4344	-0.142569	N	down	No	No	17.9843	31.4926	20.8917	33.9093	25.3242	44.2922	-0.803926	N	down	33.1205	28.7901	37.2143	33.9093	46.7046	40.6567	0.204186	N	up	17.6743	31.5391	21.2432	33.9093	25.1466	44.4559	-0.815866	N	down	Klla0B	840160
KLLA0B09702g	YPL058C	XP_003954692.1	XP_003675581.1	XP_001644351.1	NA	SAKL0C05654g;SAKL0H10670g	XP_718029.1;XP_718095.1	XP_658778.1;XP_660851.1;XP_660933.1;XP_661556.1;XP_664185.1;XP_680850.1;XP_681613.1;XP_681758.1;XP_682197.1;XP_682613.1	NP_587932.3	23.0186	129.201	68.8965	410.662	86.461	482.417	-2.4804	Y	down	No	No	28.7283	14.7526	98.1159	46.2343	118.896	60.3543	0.977226	N	up	17.6558	13.4871	57.7317	46.2343	72.5016	55.4012	0.384673	N	up	29.8313	14.7766	103.379	46.2343	122.402	60.5775	1.01184	Y	up	Klla0B	842245
KLLA0B09724g	YBR162W-A	XP_003957593.1	XP_003674689.1	XP_001643210.1	NP_984151.1	Sklu_YGOB_Anc_8.516	NA	XP_681559.1	XP_004001737.1	517.47	755.347	20.8378	31.705	26.3553	37.2531	-0.498427	N	down	No	No	810.888	893.818	28.0219	29.1683	33.9561	38.0592	-0.169548	N	down	782.674	817.191	24.2383	29.1683	30.4089	34.9361	-0.208152	N	down	853.315	895.471	29.4221	29.1683	34.8278	38.2	-0.146082	N	down	Klla0B	848785
KLLA0B09746g	YBR162C	XP_003957592.1	XP_003674690.1	XP_001644350.1	NP_984152.1	SAKL0H10692g	XP_721645.1;XP_721765.1	NA	NA	263.403	300.385	239.952	297.813	302.007	349.939	-0.21254	N	down	No	No	458.887	499.447	437.568	439.101	530.085	573.089	-0.112233	N	down	418.196	456.614	383.067	439.101	480.853	526.059	-0.130167	N	down	361.707	500.301	352.548	439.101	417.366	575.208	-0.463413	N	down	Klla0B	850402
KLLA0B09768g	YBR161W;YPL057C	XP_003954691.1;XP_003957591.1	XP_003674691.1;XP_003675583.1	XP_001643208.1	NA	SAKL0H10736g	XP_714110.1;XP_714248.1	XP_664138.1	NP_588403.1;NP_593734.1	248.914	208.943	150.287	132.045	187.685	155.182	0.274175	N	up	No	No	368.432	380.668	264.542	252.818	320.516	330.016	-0.0416715	N	down	279.885	348.016	194.528	252.818	244.218	302.933	-0.311579	N	down	349.275	381.298	256.284	252.818	303.372	331.236	-0.127597	N	down	Klla0B	852589
KLLA0B09790g	YBR160W	XP_003957590.1	XP_003674693.1	XP_001644349.1	NP_984154.1	SAKL0H10758g	XP_713486.1;XP_713525.1	XP_659471.1;XP_661786.1;XP_681530.1	NP_587921.1;NP_595629.1	63.475	102.889	30.1254	51.4254	37.8986	60.42	-0.673301	N	down	No	No	79.3142	89.4308	45.5026	48.0049	55.1398	62.7069	-0.177439	N	down	96.7766	81.7557	53.0676	48.0049	66.6258	57.5599	0.21358	N	up	72.7159	89.5592	42.9982	48.0049	50.8987	62.9386	-0.301112	N	down	Klla0B	855327
KLLA0B09812g	YBR159W	XP_003957589.1	XP_003674694.1	XP_001644348.1	NP_984155.2	SAKL0H10780g	XP_713488.1;XP_713527.1	XP_663465.1	NP_593697.1	128.415	143.135	80.2593	94.308	101.439	110.804	-0.127157	N	down	No	No	134.595	175.86	92.7528	112.434	112.367	146.808	-0.381756	N	down	147.069	160.773	96.8192	112.434	121.418	134.759	-0.149736	N	down	121.668	176.136	85.815	112.434	101.624	147.35	-0.53519	N	down	Klla0B	856799
KLLA0B09834g	YPL055C	XP_003954689.1	XP_003675584.1	XP_001642151.1	NP_984156.1	SAKL0H10802g	XP_441044.1;XP_713526.1	NA	NA	13.926	34.6036	5.70723	14.5638	7.13158	17.11	-1.26564	Y	down	No	No	32.8343	33.6512	13.7018	12.6683	16.5973	16.5402	0.021432	N	up	32.1095	30.7647	12.2141	12.6683	15.314	15.1827	0.0141979	N	up	40.0187	33.7062	16.5475	12.6683	19.5906	16.6013	0.237395	N	up	Klla0B	858130
KLLA0B09856g	YBR158W	XP_003957588.1	XP_003674695.1	XP_001644347.1	NP_984157.1	SAKL0B12826g;SAKL0G00110g;SAKL0G00132g;SAKL0G19866g;SAKL0H10824g	XP_722415.1;XP_722553.1	NA	NA	86.8063	74.9015	66.2364	60.2703	84.1745	70.82	0.249734	N	up	No	No	67.8843	79.8116	58.5364	64.1116	70.9358	83.7655	-0.232271	N	down	88.892	72.9615	74.4855	64.1116	93.5019	76.8896	0.285889	N	up	73.6511	79.9239	65.7747	64.1116	77.8774	84.075	-0.103935	N	down	Klla0B	859162
KLLA0B09878g	YPL054W	XP_003954688.1	XP_003675585.1	XP_001642172.1	NP_984158.1	SAKL0H10846g	XP_716626.1	XP_661051.1	NP_588409.2;NP_594201.1	15.8435	2.30817	11.8145	1.74495	14.9177	2.04965	2.85926	Y	up	Yes	No	11.659	2.55284	10.3244	1.96761	12.525	2.57095	2.27639	Y	up	2.23961	2.33372	1.83811	1.96761	2.2953	2.35991	0.00555162	N	up	11.0821	2.55635	9.82718	1.96761	11.6328	2.58045	2.19368	Y	up	Klla0B	862234
KLLA0B09900g	YBR157C	XP_003957587.1	XP_003674696.1	XP_001644346.1	NP_986397.1	SAKL0C02508g	NA	NA	NA	105.885	57.955	87.8814	49.071	110.114	57.6658	0.933021	N	up	No	No	134.135	51.939	124.258	44.8967	150.655	58.6872	1.3673	Y	up	47.4066	47.4793	42.5357	44.8967	53.4052	53.8693	-0.00563451	N	down	105.229	52.0037	99.1978	44.8967	117.449	58.904	1.00663	Y	up	Klla0B	866210
KLLA0B09922g	NA	NA	NA	NA	NP_986496.2	SAKL0H10890g	XP_720938.1;XP_721060.1	NA	NA	31.8419	23.8576	44.0394	33.44	55.3909	39.3002	0.494991	N	up	No	No	23.9901	27.9735	41.7796	44.5614	50.6699	58.1978	-0.207449	N	down	24.0448	25.573	39.5131	44.5614	49.5437	53.4211	-0.105029	N	down	18.3269	28.0147	32.326	44.5614	38.2706	58.4129	-0.605951	N	down	Klla0B	867748
KLLA0B09944g	YBR156C	XP_003957586.1	XP_003674697.1	XP_001644345.1;XP_001644345.1	NP_986398.1;NP_986398.1	SAKL0H10912g;SAKL0H10912g	NA	NA	NP_596135.2	9.12969	13.0481	14.2673	20.9764	17.9549	24.6486	-0.457625	N	down	No	No	13.1579	16.7832	18.8568	22.1109	22.8659	28.8787	-0.344494	N	down	14.3284	15.343	19.7774	22.1109	24.7994	26.5084	-0.0896435	N	down	13.2379	16.808	19.6487	22.1109	23.2594	28.9854	-0.311608	N	down	Klla0B	870678
KLLA0B09966g	YBR155W	XP_003957585.1	XP_003674698.1	XP_001644344.1	NP_986399.1	SAKL0H10934g	XP_718912.1;XP_719014.1	XP_663042.1	NP_594238.1	39.4451	92.44	27.3146	66.7635	34.3407	78.4422	-1.19198	Y	down	No	No	102.591	93.9666	76.6101	64.7295	92.8461	84.4479	0.131525	N	up	62.6567	85.9097	44.5116	64.7295	55.8603	77.5185	-0.478059	N	down	120.44	94.1352	91.1736	64.7295	107.939	84.7603	0.341886	N	up	Klla0B	872760
KLLA0B09988g	YDR483W;YOR099W	XP_003957584.1;XP_003959394.1	XP_003674685.1;XP_003674699.1;XP_003675138.1	XP_001642171.1;XP_001643095.1;XP_001643211.1;XP_001644799.1;XP_001644800.1	NP_986400.1;XP_002999468.1	SAKL0E10164g;SAKL0H10956g	XP_710275.1;XP_721621.1;XP_721623.1;XP_721740.1;XP_721742.1	XP_660356.1;XP_681388.1	NP_588253.1;NP_595123.2;NP_595938.1;NP_596168.1	100.602	156.022	76.067	123.769	95.9879	145.437	-0.599333	N	down	No	No	109.716	146.019	96.999	118.905	117.517	155.249	-0.398448	N	down	125.162	133.492	105.132	118.905	131.967	142.508	-0.111458	N	down	164.911	146.249	148.28	118.905	175.556	155.823	0.171904	N	up	Klla0B	874338
KLLA0B10010g	YPR192W	XP_003956520.1	XP_003677997.1	NA	NP_986401.2	SAKL0H11000g	XP_715780.1;XP_715831.1	NA	NA	40.4167	21.1047	19.8243	11.2171	24.9438	13.1835	0.91966	N	up	No	No	50.9293	21.0547	27.8091	10.708	33.7062	13.9814	1.26838	Y	up	19.306	19.2487	10.3437	10.708	12.9918	12.8339	0.0133944	N	up	70.4806	21.0889	39.4103	10.708	46.6479	14.0331	1.7311	Y	up	Klla0B	876684
KLLA0B10032g	YPL052W	XP_003958682.1	XP_003675587.1	XP_001642589.1	NP_986402.2	SAKL0H11022g;Sklu_YGOB_H11022	NA	NA	NA	130.487	69.9768	38.4746	21.4423	48.694	25.1955	0.950942	N	up	No	No	101.919	87.977	32.4584	26.437	39.3538	34.5516	0.194584	N	up	73.1152	80.4241	23.2276	26.437	29.1251	31.7152	-0.11064	N	down	80.0479	88.0919	26.5395	26.437	31.4322	34.6792	-0.12624	N	down	Klla0B	879469
KLLA0B10054g	YDR482C	XP_003957583.1	XP_003674700.1	NA	NP_986404.1	SAKL0H11044g	XP_723370.1;XP_723559.1	XP_664190.1	NP_593820.1	143.053	104.83	26.8862	20.6373	33.8622	24.2473	0.481409	N	up	No	No	125.603	89.4349	26.9023	17.8721	32.6283	23.3573	0.484847	N	up	93.79	81.7579	19.3804	17.8721	24.3335	21.4399	0.19408	N	up	111.159	89.5562	24.8452	17.8721	29.4143	23.4436	0.347044	N	up	Klla0B	880175
KLLA0B10076g	NA	NA	NA	NA	NP_986405.1	NA	XP_710509.1;XP_713494.1;XP_713535.1	NA	NA	40.1855	36.9307	36.7046	34.729	45.852	40.8055	0.167302	N	up	No	No	67.8146	36.9243	71.3881	35.9922	86.4791	46.9893	0.88423	N	up	31.3157	33.7569	31.5546	35.9922	39.621	43.133	-0.125802	N	down	53.898	36.9841	57.7688	35.9922	68.3635	47.1631	0.532217	N	up	Klla0B	881077
KLLA0B10098g	NA	NA	NA	NA	NA	NA	NA	NA	NA	11.4887	8.5871	3.04759	2.49759	3.85506	2.93493	0.395367	N	up	No	No	11.7359	4.63347	3.4167	1.2939	4.14107	1.68622	1.22891	Y	up	4.54501	4.23638	1.37834	1.2939	1.72749	1.54789	0.102211	N	up	14.5455	4.64266	4.22671	1.2939	5.00524	1.69246	1.49893	Y	up	Klla0B	884810
KLLA0B10120g	YDR317W	XP_003956316.1	NA	XP_001644214.1	NP_987014.2	SAKL0G08910g	NA	NA	NA	58.195	21.7874	35.1359	13.7377	44.5207	16.1395	1.46401	Y	up	Yes	No	88.6798	23.1302	60.5111	14.6662	73.3262	19.1417	1.93077	Y	up	18.4759	21.1465	12.4868	14.6662	15.6673	17.5709	-0.173347	N	down	85.0593	23.1695	59.8304	14.6662	70.8139	19.2125	1.87023	Y	up	Klla0B	886187
KLLA0B10142g	YDR318W	XP_003956315.1	XP_003677124.1	XP_001644215.1	NP_987015.2	SAKL0G08888g	XP_710820.1;XP_710834.1	NA	NA	21.5326	17.3676	10.5139	9.21754	13.1651	10.8296	0.279862	N	up	No	No	27.955	20.5212	17.8234	12.0236	21.6136	15.7042	0.453404	N	up	18.53	18.7601	11.2794	12.0236	14.1409	14.4152	-0.0183684	N	down	25.4476	20.5512	16.7619	12.0236	19.8366	15.7622	0.336124	N	up	Klla0B	887476
KLLA0B10153g	YDR319C	XP_003956314.1	XP_003677125.1	XP_001642682.1	NP_987016.2	SAKL0G08866g	XP_713025.1;XP_713057.1;XP_717014.1;XP_717095.1	NA	NP_596796.1	69.5075	65.0991	26.4566	26.4149	33.3031	31.0331	0.101529	N	up	No	No	77.8426	66.3209	36.4393	29.2605	44.1619	38.2302	0.218686	N	up	58.5593	60.6288	27.0805	29.2605	34.0027	35.0921	-0.0398948	N	down	54.844	66.4144	26.5472	29.2605	31.4287	38.3715	-0.27605	N	down	Klla0B	888468
KLLA0B10175g	YHR072W	XP_003957250.1	XP_003677822.1	XP_001642683.1	NP_987017.2	SAKL0G08844g	XP_722471.1;XP_722612.1	XP_681529.1	NP_593702.2	43.4381	59.454	58.6068	82.3246	73.8628	96.7432	-0.389161	N	down	No	No	44.3681	51.3104	70.3567	74.8948	85.2678	97.8035	-0.19582	N	down	61.988	46.908	93.0451	74.8948	116.847	89.7763	0.379987	N	up	47.446	51.3895	76.1984	74.8948	90.2154	98.1649	-0.120325	N	down	Klla0B	889538
KLLA0B10197g	YDR320C	XP_003956313.1	XP_003677126.1	XP_001642684.1	NP_987018.1	SAKL0G08822g	XP_714179.1;XP_714220.1	XP_682067.1	NP_593480.1	23.9856	27.3876	31.5941	37.1882	39.6983	43.6974	-0.139047	N	down	No	No	37.7183	38.6667	49.0607	46.2253	59.481	60.3549	-0.0265482	N	down	37.9926	35.3496	47.1106	46.2253	59.0847	55.4015	0.0934984	N	up	32.183	38.7283	42.6392	46.2253	50.4755	60.578	-0.264136	N	down	Klla0B	891842
KLLA0B10219g	NA	NA	NA	NA	NP_987019.1	NA	NA	NA	NA	76.5692	2.29532	18.8195	0.608548	24.0203	0.715047	5.06191	Y	up	Yes	No	54.3372	2.36615	16.2662	0.593308	19.7087	0.774339	4.64995	Y	up	1.50924	2.16332	0.374271	0.593308	NA	NA	NA	NA	NA	113.256	2.37063	34.2688	0.593308	40.58	0.777203	5.68139	Y	up	Klla0B	893941
KLLA0B10241g	YPL250C	XP_003955292.1;XP_003957832.1	XP_003676367.1;XP_003677347.1	NA	NP_985384.1	SAKL0A02684g	NA	NA	NA	69.8085	76.2117	12.5876	14.5917	15.8144	17.1459	-0.117011	N	down	No	No	139.554	137.552	24.573	22.471	29.815	29.3737	0.0181286	N	up	94.935	125.744	16.9172	22.471	21.2018	26.9623	-0.332492	N	down	102.8	137.736	19.075	22.471	22.5831	29.4822	-0.365856	N	down	Klla0B	895841
KLLA0B10263g	YMR196W	XP_003955293.1;XP_003957831.1	XP_003676369.1;XP_003677346.1	XP_001647356.1	NP_985383.2	SAKL0A02662g	XP_720033.1;XP_720166.1	XP_663890.1	NA	41.8175	16.8236	83.1651	34.6993	104.625	40.7788	1.35928	Y	up	Yes	No	21.6945	24.1416	52.0277	53.3889	63.0521	69.7886	-0.136739	N	down	27.9192	22.0687	64.1323	53.3889	80.5203	64.0594	0.33594	N	up	15.1147	24.1717	37.1765	53.3889	43.9992	70.0464	-0.662889	N	down	Klla0B	896677
KLLA0B10285g	YMR197C	XP_003959434.1	XP_003676370.1	XP_001647355.1	NP_985382.1	SAKL0A02640g	XP_720032.1;XP_720165.1	XP_659577.1	NP_596668.1	138.844	129.64	54.0882	51.4783	67.8774	60.4915	0.165779	N	up	No	No	151.213	151.03	59.7258	55.6507	72.3949	72.7054	-0.00160023	N	down	155.009	138.066	58.7244	55.6507	73.7048	66.7375	0.147267	N	up	156.685	151.238	63.6564	55.6507	75.3567	72.974	0.0526078	N	up	Klla0B	900197
KLLA0B10307g	YPL252C	XP_003957830.1	XP_003677345.1	XP_001647354.1	NP_985381.1	SAKL0A02618g	XP_720031.1;XP_720164.1	NA	NA	196.627	85.5596	46.3392	21.3933	58.3878	25.1374	1.21572	Y	up	No	No	290.256	175.573	79.1871	44.3156	96.0076	57.8814	0.730116	N	up	104.364	160.506	27.1964	44.3156	34.1398	53.1306	-0.636059	N	down	323.558	175.827	90.9396	44.3156	107.673	58.0953	0.894689	N	up	Klla0B	901566
KLLA0B10329g	YMR198W	XP_003957829.1;XP_003959435.1	XP_003676371.1;XP_003677344.1	XP_001647353.1	NP_985380.1	SAKL0A02596g	NA	NA	NA	17.0337	24.0076	19.4912	26.9255	24.4489	31.6438	-0.372995	N	down	No	No	22.4341	23.6825	29.7885	29.0491	36.0862	37.9242	-0.0632299	N	down	24.1907	21.651	31.0569	29.0491	38.9787	34.8118	0.160306	N	up	25.3448	23.7208	34.1998	29.0491	40.479	38.0645	0.0843414	N	up	Klla0B	902691
KLLA0B10351g	YPL254W	XP_003957828.1	XP_003677343.1	XP_001647352.1	NP_985379.2	SAKL0A02574g	XP_720002.1;XP_720134.1	NA	NP_596492.1	50.2683	45.2293	39.0381	35.4735	49.3918	41.6831	0.245229	N	up	No	No	49.6584	46.6677	45.0639	39.2346	54.617	51.2369	0.0949174	N	up	42.4529	42.6637	37.0148	39.2346	46.4189	47.0316	-0.0158666	N	down	41.0748	46.74	38.1441	39.2346	45.1557	51.4263	-0.185093	N	down	Klla0B	904656
KLLA0B10373g	YBR250W	XP_003958531.1	XP_003677773.1	XP_001647168.1	NP_985500.2	SAKL0A05632g	NA	NA	NA	38.2002	4.9609	35.4641	4.74736	45.1089	5.57912	3.01528	Y	up	Yes	No	42.5006	8.32545	50.7912	9.17158	61.548	11.9822	2.37762	Y	up	4.84158	7.61099	5.634	9.17158	7.08037	10.9986	-0.630636	N	down	34.2318	8.33763	41.5872	9.17158	49.225	12.0265	2.04797	Y	up	Klla0B	906659
KLLA0B10395g	NA	XP_003958531.1	XP_003677773.1	NA	NP_985500.2	SAKL0A05632g	NA	NA	NA	226.872	60.6124	136.827	37.7876	172.376	44.4034	1.95676	Y	up	Yes	No	511.842	85.674	393.362	60.2111	476.686	78.5419	2.59587	Y	up	36.8885	78.3282	27.4671	60.2111	34.4645	72.0973	-1.07053	Y	down	460.675	85.8284	360.927	60.2111	427.261	78.8324	2.431	Y	up	Klla0B	909517
KLLA0B10406g	NA	NA	NA	NA	NA	NA	NA	NA	NA	191.237	53.73	40.3604	11.9212	50.5073	14.0114	1.84942	Y	up	Yes	No	575.743	90.5269	105.958	15.5077	128.388	20.2251	2.64625	Y	up	37.124	82.7682	6.85371	15.5077	8.60131	18.5656	-1.12625	Y	down	500.293	90.7044	94.538	15.5077	111.922	20.2999	2.43777	Y	up	Klla0B	910676
KLLA0B10428g	NA	NA	NA	NA	NA	NA	NA	NA	NA	60.0414	63.1629	14.9737	15.8472	18.821	18.619	0.0151131	N	up	No	No	80.1939	59.6943	20.0779	13.3141	24.3523	17.387	0.471478	N	up	46.2856	54.5725	11.0638	13.3141	13.8801	15.96	-0.197643	N	down	87.9382	59.7858	21.5377	13.3141	25.5031	17.4513	0.553088	N	up	Klla0B	911707
KLLA0B10450g	YPL177C	XP_003955007.1;XP_003958532.1	XP_003677772.1	XP_001647169.1	NP_985499.1	SAKL0A05610g	XP_720839.1;XP_721352.1	XP_658489.1;XP_659624.1;XP_660295.1;XP_682597.1	NA	163.049	130.989	116.423	97.0243	146.81	114.004	0.364882	N	up	No	No	174.414	162.17	138.513	118.299	167.845	154.414	0.120146	N	up	121.248	148.26	91.93	118.299	115.33	141.742	-0.29868	N	down	139.623	162.439	113.079	118.299	133.873	154.985	-0.213149	N	down	Klla0B	912877
KLLA0B10472g	YPL178W	XP_003955006.1	XP_003676300.1	XP_001647290.1	NP_985498.1	SAKL0A05588g	XP_713573.1;XP_713608.1	XP_663746.1	NP_596414.1	260.544	246.794	83.1396	80.7294	104.199	94.8602	0.13511	N	up	No	No	274.294	228.989	95.5467	72.6478	115.795	94.8189	0.286138	N	up	189.984	209.35	63.0342	72.6478	79.1073	87.0377	-0.140844	N	down	258.35	229.377	90.6932	72.6478	107.373	95.1695	0.170476	N	up	Klla0B	914512
KLLA0B10538g	YBL011W	XP_003959018.1	XP_003675136.1	XP_001644985.1	NP_986036.2	SAKL0H21560g	XP_710056.1;XP_715291.1;XP_715356.1	XP_663203.1	NP_596450.1	64.2447	60.3847	92.449	91.4878	116.589	107.503	0.11707	N	up	No	No	75.2316	126.225	118.442	182.988	143.627	239.035	-0.73646	N	down	121.43	115.393	182.638	182.988	229.187	219.415	0.0639043	N	up	53.2103	126.409	85.6283	182.988	101.4	239.918	-1.24036	Y	down	Klla0B	919185
KLLA0B10560g	YPR163C	XP_003954884.1	XP_003677685.1	XP_001646237.1	NP_983127.2	SAKL0F15554g	XP_716672.1;XP_716731.1	XP_680619.1	NP_595728.1	86.5441	191.176	111.62	263.097	140.089	309.148	-1.1421	Y	down	No	No	242.702	300.04	231.059	262.502	280.009	342.593	-0.291407	N	down	280.935	274.308	256.553	262.502	321.902	314.479	0.0328845	N	up	302.156	300.549	294.255	262.502	348.358	343.86	0.0176269	N	up	Klla0B	921743
KLLA0B10582g	YLR454W	XP_003954883.1	XP_003677684.1	XP_001646236.1	NP_983128.2	SAKL0F15576g	XP_716671.1;XP_716730.1	XP_680617.1	NP_594183.2	17.9772	11.7158	85.0972	56.9999	107.568	66.9828	0.683641	N	up	No	No	12.0758	13.6067	71.7446	74.444	86.9239	97.2168	-0.15601	N	down	15.0366	12.4392	85.8514	74.444	107.758	89.2377	0.272587	N	up	9.87204	13.6274	59.7658	74.444	70.7443	97.5761	-0.463007	N	down	Klla0B	924069
KLLA0B10604g	NA	NA	NA	NA	NA	SAKL0F15598g	NA	NA	NA	10.9915	13.9235	22.2886	28.7723	27.9368	33.8073	-0.276273	N	down	No	No	13.0906	11.7674	32.6041	27.0088	39.5053	35.2605	0.167859	N	up	10.1078	10.7579	24.2782	27.0088	30.4353	32.3667	-0.0880312	N	down	16.7112	11.7863	42.6651	27.0088	50.5132	35.3908	0.510458	N	up	Klla0B	932289
KLLA0B10626g	YPR165W	XP_003954882.1;XP_003955483.1	XP_003674443.1;XP_003677683.1	XP_001643537.1;XP_001646234.1;XP_001646235.1	NP_983130.1;NP_983131.1	SAKL0F15620g;SAKL0F15642g	XP_715774.1;XP_715825.1	XP_660291.1;XP_662557.1;XP_663344.1	NP_001018257.1;NP_593631.1;NP_594490.1;NP_594569.1	1066.96	1059.66	346.036	361.213	436.5	424.462	0.0403643	N	up	No	No	931.571	1082.57	348.121	372.76	421.891	486.62	-0.20597	N	down	974.556	989.705	349.208	372.76	438.346	446.684	-0.0275517	N	down	898.534	1084.32	341.305	372.76	404.111	488.419	-0.273644	N	down	Klla0B	936497
KLLA0B10648g	YPR166C	XP_003955482.1	XP_003674444.1	XP_001646233.1	NP_983132.1	SAKL0F15664g	XP_721931.1;XP_722092.1	XP_662215.1	NP_593797.1	359.79	338.57	47.9646	47.1997	60.1091	55.4594	0.11555	N	up	No	No	1131.09	614.932	152.458	77.6199	184.801	101.31	0.864011	N	up	395.688	562.194	51.5344	77.6199	64.5956	92.9958	-0.525945	N	down	1420.14	615.981	196.476	77.6199	232.577	101.684	1.19042	Y	up	Klla0B	937752
KLLA0B10670g	YIR030C	XP_003959213.1	XP_003676432.1	NA	NA	SAKL0C00880g	XP_719943.1;XP_720073.1	XP_681686.1	NP_588429.1;NP_594496.1	38.9101	57.8695	16.9713	26.4538	21.4475	31.0847	-0.534602	N	down	No	No	50.9926	46.2856	27.1224	22.2879	32.8815	29.1111	0.175687	N	up	52.4823	42.3134	26.4583	22.2879	33.171	26.7217	0.318587	N	up	46.6763	46.3527	25.1678	22.2879	29.8002	29.2186	0.0370493	N	up	Klla0B	938387
KLLA0B10692g	YPR167C	XP_003955481.1	XP_003674445.1	XP_001643538.1	NP_984602.1	SAKL0F15686g	XP_715415.1;XP_715485.1	XP_662374.1	NP_593708.1	188.599	112.805	81.1932	51.0968	102.849	60.0337	0.77686	N	up	No	No	153.754	90.8698	73.9975	39.8524	89.6597	52.109	0.796437	N	up	137.777	83.0667	62.2752	39.8524	78.1301	47.8309	0.718166	N	up	207.494	90.9801	102.43	39.8524	121.243	52.3014	1.22544	Y	up	Klla0B	939675
KLLA0B10714g	YPR168W	XP_003954881.1	XP_003677682.1	XP_001643539.1	NP_984601.2	SAKL0F15708g	XP_716337.1;XP_716399.1	NA	NP_596571.2	21.3173	36.6191	4.84253	8.45338	6.05128	9.93179	-0.718572	N	down	No	No	41.8451	47.6799	10.6717	10.7382	12.9254	14.012	-0.108917	N	down	32.9935	43.5912	8.34604	10.7382	10.4756	12.8622	-0.310607	N	down	40.7479	47.7631	9.96298	10.7382	11.7951	14.0638	-0.271259	N	down	Klla0B	941126
KLLA0B10736g	YPR169W	XP_003955480.1	XP_003674446.1	XP_001646232.1	NP_984600.2	SAKL0F15730g	XP_723241.1;XP_723432.1	XP_662781.1	XP_001713048.1	42.8587	78.2598	42.0439	79.4657	52.8062	93.3714	-0.822601	N	down	No	No	79.4149	70.9373	86.488	71.3215	104.788	93.0806	0.170767	N	up	62.2863	64.8535	65.0898	71.3215	81.6536	85.4422	-0.0682422	N	down	92.5401	71.0581	102.756	71.3215	121.638	93.4248	0.376119	N	up	Klla0B	941796
KLLA0B10769g	YPR170W-B	XP_003955479.1	XP_003677681.1	XP_001646231.1	NP_984599.1	SAKL0F15796g	NA	NA	NP_001018267.3	173.768	199.27	73.1023	83.9816	91.814	98.6831	-0.104348	N	down	No	No	197.709	206.442	92.2548	87.5117	111.807	114.345	-0.0277433	N	down	196.707	188.717	91.8682	87.5117	115.281	104.959	0.138859	N	up	199.683	206.704	97.2975	87.5117	115.193	114.768	0.0102492	N	up	Klla0B	943832
KLLA0B10780g	YPR171W	XP_003955478.1	XP_003674447.1	XP_001646230.1;XP_001646230.1	NP_984598.2;NP_984598.2	SAKL0F15818g	NA	NA	NA	42.2359	54.1274	52.4211	70.0786	65.9217	82.3471	-0.321205	N	down	No	No	87.2214	80.26	100.989	86.2078	122.416	112.522	0.118388	N	up	66.1122	73.3761	73.4007	86.2078	92.0977	103.288	-0.167485	N	down	106.441	80.3939	126.119	86.2078	149.296	112.938	0.399679	N	up	Klla0B	944758
KLLA0B10802g	YLR455W	XP_003954880.1	XP_003677680.1	XP_001647103.1	NP_984597.1	SAKL0F15840g	XP_716676.1;XP_716735.1	XP_659070.1	NP_595841.1;NP_596684.1	53.3344	83.021	37.1273	60.6166	46.9333	71.2237	-0.601335	N	down	No	No	84.8292	107.574	57.2345	66.7227	69.4205	87.1274	-0.336214	N	down	98.2111	98.3442	63.1729	66.7227	79.2814	79.9765	-0.0123363	N	down	89.7857	107.74	61.6551	66.7227	72.9923	87.4494	-0.259743	N	down	Klla0B	947115
KLLA0B10824g	YLR456W;YPR172W	XP_003954879.1;XP_003955477.1	XP_003674448.1;XP_003677679.1	XP_001646229.1	NP_984596.2	SAKL0F15862g	XP_720531.1;XP_720659.1	XP_662384.1	NP_594810.1	528.809	281.095	165.184	92.3889	207.971	108.569	0.937744	N	up	No	No	478.258	425.604	155.237	126.691	188.231	165.512	0.185669	N	up	416.215	389.076	129.757	126.691	162.876	151.926	0.101991	N	up	387.639	426.207	129.582	126.691	153.423	166.123	-0.111932	N	down	Klla0B	948593
KLLA0B10846g	YPR173C	XP_003955476.1	XP_003674449.1	XP_001646228.1	NP_984595.1	SAKL0F15884g	XP_720644.1;XP_720771.1	XP_660665.1	NP_593086.1	65.1913	59.2193	55.4991	51.7982	69.7183	60.8693	0.195499	N	up	No	No	76.4873	66.6536	67.4467	55.1313	81.7588	72.0057	0.184389	N	up	64.0462	60.9337	54.6558	55.1313	68.5664	66.0957	0.0556961	N	up	68.9349	66.7514	62.2856	55.1313	73.7403	72.2718	0.032719	N	up	Klla0B	949338
KLLA0B10868g	YGR124W;YPR145W	XP_003958534.1	XP_003677188.1	XP_001643790.1	NP_985850.1	SAKL0F02970g	XP_712554.1;XP_712583.1	XP_662005.1	NP_595291.1	417.045	523.016	501.225	673.875	630.399	791.754	-0.328799	N	down	No	No	875.322	846.627	1051.74	938.087	1274.38	1224.3	0.0577934	N	up	696.19	774.019	801.115	938.087	1004.87	1123.83	-0.161575	N	down	940.015	848.073	1154.2	938.087	1366.58	1228.83	0.152996	N	up	Klla0B	951111
KLLA0B10890g	YPR144C	XP_003956095.1	XP_003677187.1	XP_001643036.1	NP_984268.2	SAKL0F03014g	XP_713159.1;XP_713205.1	XP_659137.1	NP_596634.1	39.0189	67.8323	32.553	59.1117	40.6688	69.4459	-0.772528	N	down	No	No	70.5975	56.4246	76.7727	56.6163	92.9801	73.88	0.333645	N	up	38.3703	51.5861	40.1248	56.6163	50.3329	67.8174	-0.433982	N	down	93.9578	56.5234	103.939	56.6163	123.065	74.1533	0.724984	N	up	Klla0B	954119
KLLA0B10912g	YGR123C	XP_003956092.1	XP_003677186.1	XP_001644122.1	NP_982624.2	SAKL0F03102g	XP_721631.1;XP_721750.1	NA	NP_596740.1	34.4317	57.0308	31.2599	53.386	39.2283	62.7223	-0.67745	N	down	No	No	59.9971	59.241	64.1438	58.0894	77.7229	75.8202	0.0358471	N	up	45.1776	54.1596	46.552	58.0894	58.4076	69.598	-0.255766	N	down	76.3506	59.3388	83.2081	58.0894	98.5321	76.1005	0.369582	N	up	Klla0B	955948
KLLA0B10934g	YPR143W	XP_003956091.1	XP_003677185.1	XP_001644121.1	NP_986918.1	SAKL0F03146g	XP_710002.1	XP_681516.1	NP_592956.1	36.6582	79.3989	16.2973	35.7218	20.2287	41.9705	-1.0546	Y	down	No	No	103.352	73.4876	49.5903	32.6673	60.0688	42.6731	0.506868	N	up	63.339	67.1805	29.3242	32.6673	36.8163	39.1704	-0.0857729	N	down	167.682	73.5919	81.8101	32.6673	96.8553	42.8308	1.18469	Y	up	Klla0B	957643
KLLA0B10956g	YPR141C	XP_003956090.1	XP_003677184.1	XP_001644120.1;XP_001647101.1	NP_986919.1	SAKL0F03168g	XP_714133.1;XP_714271.1	XP_663944.1	NP_593458.1;NP_594189.1	8.86399	12.2308	11.868	15.9731	14.7848	18.7711	-0.346434	N	down	No	No	11.2912	9.89273	16.9252	13.7115	20.5038	17.8905	0.195029	N	up	9.5106	9.04448	13.4338	13.7115	16.8733	16.4224	0.0239045	N	up	12.2271	9.91036	18.6765	13.7115	22.1137	17.9566	0.283889	N	up	Klla0B	958985
KLLA0B10978g	YPR140W	XP_003956089.1	XP_003677183.1	XP_001644119.1	NP_986920.1	SAKL0F03212g	XP_714129.1;XP_714267.1	XP_663979.1	NA	62.6447	106.512	45.0186	79.4324	56.5926	93.3162	-0.72172	N	down	No	No	135.919	116.584	112.585	89.3261	136.374	116.552	0.226688	N	up	74.9899	106.587	59.206	89.3261	74.2569	106.988	-0.529421	N	down	179.065	116.789	151.408	89.3261	179.233	116.983	0.610874	N	up	Klla0B	961330
KLLA0B11000g	YPR139C	XP_003956088.1	XP_003677182.1	XP_001644118.1	NP_986921.1	SAKL0F03234g	XP_713648.1;XP_713693.1	XP_663949.1	NP_593657.2	102.122	123.77	44.3313	55.4028	55.8425	65.0931	-0.221141	N	down	No	No	114.553	121.393	58.4393	57.4195	70.813	74.9442	-0.0821267	N	down	93.688	110.981	45.5983	57.4195	57.2164	68.794	-0.269107	N	down	122.827	121.596	64.0334	57.4195	75.8197	75.2213	0.00770187	N	up	Klla0B	962820
KLLA0B11011g	YGR122W	XP_003956358.1	XP_003676528.1	XP_001644117.1	NP_982622.1	SAKL0F03256g	NA	NA	NA	50.2245	41.5904	33.7455	29.0863	42.6627	34.1729	0.320513	N	up	No	No	68.8844	75.6942	50.6115	51.1816	61.3092	66.8395	-0.114755	N	down	55.1488	69.1996	38.7227	51.1816	48.5924	61.3536	-0.335042	N	down	64.4788	75.8101	48.1866	51.1816	57.05	67.0865	-0.231073	N	down	Klla0B	963671
KLLA0B11033g	YGR121C;YPR138C	XP_003956087.1	XP_003674115.1	XP_001647099.1	NP_982623.1	SAKL0F03278g	XP_721572.1;XP_721693.1	XP_658785.1;XP_680732.1	NP_588424.1;NP_593462.1;NP_593983.1	14.6177	24.904	12.1042	22.2439	15.1808	26.1349	-0.78489	N	down	No	No	19.1843	24.6764	18.2359	21.3518	22.0905	27.864	-0.330177	N	down	22.146	22.5601	20.1916	21.3518	25.3315	25.5775	-0.0219806	N	down	24.4929	24.7187	23.8103	21.3518	28.1851	27.9671	-0.00151801	N	down	Klla0B	966275
KLLA0B11055g	NA	NA	NA	NA	NA	NA	NA	NA	NA	251.629	238.714	144.855	151.774	183.538	178.35	0.0415744	N	up	No	No	596.682	497.247	318.526	247.704	385.993	323.182	0.255285	N	up	425.319	454.612	219.694	247.704	275.723	296.663	-0.10691	N	down	527.957	498.141	289.234	247.704	342.408	324.377	0.0763435	N	up	Klla0B	969484
[truncated: 4,123 more rows]
[truncated: 13 more columns]
